# Supplementary material for: Heat-not-burn tobacco products: a systematic literature review
Source: PubMed Central journal article supplement (PMC6824610; doi:10.1136/tobaccocontrol-2018-054419), 2018-09-04
Supplement: tobaccocontrol-2018-054419supp001.pdf [file tobaccocontrol-2018-054419supp001.pdf]

## Supplementary material and appendices for Heat-not-burn tobacco products: a systematic literature review

Erikas Simonavicius<sup>1</sup>, Ann McNeill<sup>1,2</sup>, Lion Shahab<sup>3</sup>, Leonie S Brose<sup>1,2</sup>

<sup>1</sup> King's College London, Department of Addictions, Institute of Psychiatry, Psychology and Neuroscience, 4 Windsor Walk, London, SE5 8BB, United Kingdom

<sup>2</sup> UK Centre for Tobacco and Alcohol Studies, United Kingdom

<sup>3</sup> University College London, Behavioural Science and Health Institute of Epidemiology & Health, London, United Kingdom

### Correspondence to:

Erikas Simonavicius, Department of Addictions, Institute of Psychiatry, Psychology and Neuroscience, King's College London, 4 Windsor Walk, London SE5 8BB, United Kingdom. E-mail: [erikas.simonavicius@kcl.ac.uk](mailto:erikas.simonavicius@kcl.ac.uk)

### Supplementary tables

|                                                                                                                                        |   |
|----------------------------------------------------------------------------------------------------------------------------------------|---|
| Table S1 Toxicants, carcinogens and other compounds, and their related biomarkers of exposure measured in human exposure studies ..... | 2 |
| Table S2 Nicotine delivery after use of a regular tobacco stick.....                                                                   | 2 |
| Table S3 Quality rating of randomised controlled trials and crossover studies .....                                                    | 3 |

Table S1 Toxicants, carcinogens and other compounds, and their related biomarkers of exposure measured in human exposure studies [1]

| Harmful and potentially harmful compounds (HPHC)     | Risk                                                             | Measured biomarker of exposure                                                                                                                                                      |
|------------------------------------------------------|------------------------------------------------------------------|-------------------------------------------------------------------------------------------------------------------------------------------------------------------------------------|
| 1,3-butadiene                                        | Carcinogen, respiratory & reproductive/developmental toxicant    | Monohydroxybutenyl mercapturic acid (MHBMA)                                                                                                                                         |
| 1-aminonaphthalene                                   | Carcinogen                                                       | 1-aminonaphthalene (1-NA)                                                                                                                                                           |
| 2-aminonaphthalene                                   | Carcinogen                                                       | 2-aminonaphthalene (2-NA)                                                                                                                                                           |
| 4-aminobiphenyl                                      | Carcinogen                                                       | 4-aminobiphenyl (4-ABP)                                                                                                                                                             |
| Acetaldehyde                                         | Carcinogen, respiratory toxicant & addictive                     | No valid biomarker                                                                                                                                                                  |
| Acrolein                                             | Respiratory & cardiovascular toxicant                            | 3-hydroxypropylmercapturic acid (3-HPMA)                                                                                                                                            |
| Acrylonitrile                                        | Carcinogen, respiratory toxicant                                 | 2-cyanoethylmercapturic acid (CEMA)                                                                                                                                                 |
| Ammonia                                              | Respiratory toxicant                                             | No valid biomarker                                                                                                                                                                  |
| Benzene                                              | Carcinogen, cardiovascular & reproductive/developmental toxicant | S-phenylmercapturic acid (S-PMA)                                                                                                                                                    |
| Benzo(a)pyrene                                       | Carcinogen                                                       | 3-hydroxy-benzo(a)pyrene (Total-3-OH-B[a]P)                                                                                                                                         |
| Carbon monoxide                                      | Reproductive/developmental toxicant                              | Carboxyhemoglobin (COHb)                                                                                                                                                            |
| Crotonaldehyde                                       | Carcinogen                                                       | 3-hydroxy-1-methylpropylmercapturic acid (3-HMPMA)                                                                                                                                  |
| Formaldehyde                                         | Carcinogen & respiratory toxicant                                | No valid biomarker                                                                                                                                                                  |
| Isoprene                                             | Carcinogen                                                       | No valid biomarker                                                                                                                                                                  |
| N-nitrosornicotine (NNN)                             | Carcinogen                                                       | Total N-nitrosornicotine (NNN)                                                                                                                                                      |
| 4-(methylnitrosamino)-1-(3-pyridyl)-1-butanone (NNK) | Carcinogen                                                       | Total 4-(methylnitrosamino)-1-(3-pyridyl)-1-butanol (NNAL)                                                                                                                          |
| Toluene                                              | Respiratory & reproductive/developmental toxicant                | S-benzylmercapturic acid (S-BMA)                                                                                                                                                    |
| Nicotine                                             | Reproductive/developmental toxicant & addictive                  | Total nicotine equivalents in urine (free nicotine, nicotine-glucuronide, free cotinine, cotinine-glucuronide, free trans-3'-hydroxycotinine, trans-3'-hydroxycotinine-glucuronide) |

Table S2 Nicotine delivery after use of a regular tobacco stick

| Pharmacokinetic parameters      | THS 2.1 [2]      | THS 2.2 [3]* | PNTV product [4]** |
|---------------------------------|------------------|--------------|--------------------|
| C <sub>max</sub> (ng/mL)        | 8.4 (6.8–10.3)   | 14.3; 11.53  | 5.39 (4.34, 6.69)  |
| AUC <sub>0-last</sub> (ng*h/mL) | 17.7 (15.0–20.8) | 23.75; 18.92 | 4.12 (3.43, 4.95)  |
| t <sub>1/2</sub> (h)            | 2.6 (2.3–3.0)    | 3.81; 4.16   | 1.66 (1.41, 1.95)  |
| t <sub>max</sub> (min)          | 8 (4–61)         | 6; 6         | 3.86 (2.83–7.83)   |

\* Two reported least square means are from THS 2.2 comparison with cigarette and with nicotine gum, respectively

\*\* As the product does not contain nicotine sticks, it was used for 3 minutes, 10 puffs at approximately 20 sec intervals  
C<sub>max</sub>: maximum observed plasma concentration; AUC<sub>0-last</sub>: area under the plasma concentration-time curve from time 0 to the last quantifiable concentration; t<sub>1/2</sub>: terminal elimination half-life; t<sub>max</sub>: time to C<sub>max</sub>.

Table S3 Quality rating of randomised controlled trials and crossover studies

| Study authors, year          | Funding | EPHPP          |              |             |          |                 |           |          | Study period    | Protocol registration date |
|------------------------------|---------|----------------|--------------|-------------|----------|-----------------|-----------|----------|-----------------|----------------------------|
|                              |         | Selection bias | Study design | Confounders | Blinding | Data collection | Drop outs | Overall  |                 |                            |
| Ludicke et al., 2017a [5]**  | Tob     | 2              | 1            | 1           | 2        | 1               | 1         | Strong   | 06–07/2012      | 01/2013**                  |
| Ludicke et al., 2016 [6]*    | Tob     | 2              | 1            | 1           | 3        | 1               | 1         | Moderate | 11/2008–02/2009 | 12/2008*                   |
| Picavet et al., 2016 [2]**   | Tob     | 2              | 2            | 3           | 3        | 1               | 1         | Weak     | 05–06/2012      | 01/2013**                  |
| Lopez et al., 2016 [7]       | Indep   | 2              | 2            | 3           | 3        | 1               | 3         | Weak     | Not reported    | Not registered             |
| Haziza et al., 2016a [8]**   | Tob     | 2              | 1            | 1           | 2        | 1               | 1         | Strong   | 07/2013         | 10/2013**                  |
| Haziza et al., 2016b [9]**   | Tob     | 3              | 1            | 1           | 2        | 1               | 1         | Moderate | 07–09/2013      | 10/2013**                  |
| Ludicke et al., 2017b [10]** | Tob     | 3              | 1            | 1           | 1        | 1               | 1         | Moderate | 07/2013         | 10/2013**                  |
| Ludicke et al., 2017c [11]** | Tob     | 3              | 1            | 1           | 1        | 1               | 1         | Moderate | 07/2013         | 10/2013**                  |
| Brossard et al., 2017 [3]*   | Tob     | 3              | 2            | 1           | 3        | 1               | 1         | Weak     | 07–11/2013      | 10/2013*                   |
| Gee et al., 2017 [12]        | Tob     | 2              | 2            | 3           | 3        | 1               | 3         | Weak     | Not reported    | Not reported               |
| Yuki et al., 2017 [4]        | Tob     | 2              | 2            | 3           | 3        | 1               | 1         | Weak     | Not reported    | Not reported               |

Note: 1 - strong, 2 - moderate, 3 - weak. Tob – tobacco industry-funded research, indep – independently-funded research.

\* Study protocol has been registered while the study was ongoing

\*\* Study protocol has been registered when the study had been finished

## Appendices

|                                                                                                      |    |
|------------------------------------------------------------------------------------------------------|----|
| Table A1 Search strategies and outcomes for all databases .....                                      | 5  |
| Table A2 Studies and findings on heat not burn sidestream, mainstream and secondhand emissions ..... | 6  |
| Table A3 Findings of the studies on heat not burn use by human participants .....                    | 34 |
| Table A4 Findings of epidemiology studies on heat not burn use.....                                  | 54 |

Table A1 Search strategies and outcomes for all databases

| Database                                                                                                       | Search strategy                                                                                                                                                                                                         | Outcome on 13 <sup>th</sup> July 2017 |
|----------------------------------------------------------------------------------------------------------------|-------------------------------------------------------------------------------------------------------------------------------------------------------------------------------------------------------------------------|---------------------------------------|
| <b>Medline</b><br>Ovid MEDLINE(R) In-Process & Other Non-Indexed Citations and Ovid MEDLINE(R) 1946 to Present | 1. "heat not burn".mp.<br>2. "tobacco heating system".mp.<br>3. (heat* adj3 tobacco).mp.<br>4. IQOS.mp.<br>5. Ploom.mp.<br>6. Heets.mp. OR glo.mp.<br>7. 1 or 2 or 3 or 4 or 5 or 6<br>8. limit 7 to yr="2010 -Current" | 77 references exported                |
| <b>Embase</b><br>Embase 1974 to 2017 Week 28                                                                   | 1. "heat not burn".mp.<br>2. "tobacco heating system".mp.<br>3. (heat* adj3 tobacco).mp.<br>4. IQOS.mp.<br>5. Ploom.mp.<br>6. Heets.mp. OR glo.mp.<br>7. 1 or 2 or 3 or 4 or 5 or 6<br>8. limit 7 to yr="2010 -Current" | 104 references exported               |
| <b>PsycINFO</b><br>PsycINFO 1806 to July Week 1 2017                                                           | 1. "heat not burn".mp.<br>2. "tobacco heating system".mp.<br>3. (heat* adj3 tobacco).mp.<br>4. IQOS.mp.<br>5. Ploom.mp.<br>6. Heets.mp. OR glo.mp.<br>7. 1 or 2 or 3 or 4 or 5 or 6<br>8. limit 7 to yr="2010 -Current" | 12 references exported                |
| <b>ProQuest Social Sciences Premium Collection</b>                                                             | "Heat not burn" OR<br>"Tobacco heating system"OR<br>(heat* hadj3 tobacco) OR<br>IQOS OR<br>Ploom OR<br>Heets OR<br>glo<br>Limited to: after 01/01/2010 AND Peer reviewed                                                | 20 references exported                |
| <b>Scopus</b>                                                                                                  | (ALL ( "Heat not burn" ) OR                                                                                                                                                                                             | 492 references exported               |

|                                                         |                                                                                                                                                                                                                                                                     |                         |
|---------------------------------------------------------|---------------------------------------------------------------------------------------------------------------------------------------------------------------------------------------------------------------------------------------------------------------------|-------------------------|
|                                                         | ALL ( "Tobacco heating system" ) OR<br>ALL ( heat??? W/3 tobacco ) OR<br>ALL ( "IQOS" OR "Ploom " OR "Heets" OR "glo" )) AND<br>PUBYEAR > 2009                                                                                                                      |                         |
| <b>Web of Science</b><br>Web of Science Core Collection | TOPIC: ("Heat not burn") OR<br>TOPIC: ("Tobacco heating system") OR<br>TOPIC: (heat* Near/3 tobacco) OR<br>TOPIC: ("IQOS" OR "Ploom" OR "Heets" OR<br>"Heatsticks" OR "glo")<br>Timespan: 2010-2017.<br>Indexes: SCI-EXPANDED, SSCI, A&HCI, CPCI-S, CPCI-SSH, ESCI. | 138 references exported |

Table A2 Studies and findings on heat not burn sidestream, mainstream and secondhand emissions

|                                                            |                                                                                                                                                                                                                                                                                                                                                                                                                                                                                                                                                                                               |
|------------------------------------------------------------|-----------------------------------------------------------------------------------------------------------------------------------------------------------------------------------------------------------------------------------------------------------------------------------------------------------------------------------------------------------------------------------------------------------------------------------------------------------------------------------------------------------------------------------------------------------------------------------------------|
| <b>Mainstream emissions produced using machine smoking</b> |                                                                                                                                                                                                                                                                                                                                                                                                                                                                                                                                                                                               |
| <b>Authors, study year</b>                                 | <b>Auer et al., 2017 [13]</b>                                                                                                                                                                                                                                                                                                                                                                                                                                                                                                                                                                 |
| <b>Funder/Affiliations</b>                                 | <b>Affiliations:</b> <ul style="list-style-type: none"> <li>• Institute of Primary Health Care (BIHAM), University of Bern, Bern, Switzerland</li> <li>• Department of Ambulatory Care and Community Medicine, University of Lausanne, Lausanne, Switzerland</li> <li>• Institute for Work and Health, University of Lausanne and Geneva, Lausanne, Switzerland</li> </ul>                                                                                                                                                                                                                    |
| <b>Primary aim</b>                                         | To compare levels of HPHC in mainstream IQOS emissions with those in mainstream cigarette smoke                                                                                                                                                                                                                                                                                                                                                                                                                                                                                               |
| <b>Products used</b>                                       | <ul style="list-style-type: none"> <li>• IQOS with regular tobacco sticks</li> <li>• Cigarette (Lucky Strike Blue Lights)</li> </ul>                                                                                                                                                                                                                                                                                                                                                                                                                                                          |
| <b>Methods</b>                                             | <b>Design:</b> Laboratory comparison study using smoking machines<br><b>Study time and setting:</b> not reported<br><b>Method description:</b> For tested products mainstream smoke and aerosol was produced following the International Organization for Standardization (ISO) machine smoking regime (35 ml puff volume at 2 puffs per minute, for 5–6 minutes or a mean of 14 puffs). Polycyclic aromatic hydrocarbons generated by reference cigarettes were not analysed and for comparison the mean values in the 35 best-selling cigarettes brands in the United States are used [14]. |
| <b>Participants</b>                                        | Not reported                                                                                                                                                                                                                                                                                                                                                                                                                                                                                                                                                                                  |
| <b>Interventions/Exposure</b>                              | 'We trapped polycyclic aromatic hydrocarbons from IQOS cigarette smoke in a glass filter (Whatman 37 mmØGF/B) mounted in line with an XAD2 cartridge. For each sampling, 10 IQOS cigarettes were smoked. Each sampling support was desorbed in 10mLof acetonitrile and sonicated for 1 hour. The eluate was evaporated in a vacuum concentrator (Speed Vac SC-200, ThermoFisher                                                                                                                                                                                                               |

|                                 | <p>Scientific) set with 30 millibars and 27g until the residue was almost dry to prevent evaporation of the most volatile polycyclic aromatic hydrocarbons. The residue was filtered with polytetrafluoroethylene membrane (Acrodisc CR 13 mm, 0.45 µm, Pall Life Sciences) before it was analysed with a high-performance liquid chromatography device (Ultimate 3000, ThermoFisher Scientific) equipped with a fluorescence detector (FLD- 3000RS), UV detector (VWD-3000), and a separation column Nucleodur EC 150 × 3mm C18 3 µm (Macherey-Nagel) under isocratic conditions (1.2mL min<sup>-1</sup>). We injected 2 µL into the high-performance liquid chromatography chain; methanol/ water (70/30) with acetonitrile was the eluent solvent at an initial ratio of 100% to 0% (4 minutes) and a linear gradient up to 100% acetonitrile (12 minutes)' [13]</p>                                                                                                                                                                                                                                                                                                                                                                                                                                                                                                                                                                                                                                                                                                                                                                                                                                                                                                                                                                                                                                                                                                                                                                                                                                                                                                                                                                                                                                                                                                                                                                                                                                                                                                                                                                                                                                                                                                                                                                                                                                                                                                                                                                                                                                                                                                                                                                                                                                                                                                                                                                                                                                                                                                                                                                                                                                                                                                                                    |              |                                       |                                       |                                   |  |  |                         |          |     |                    |           |     |                      |           |     |                         |           |     |                           |           |    |                         |           |     |                             |           |     |                            |           |     |                                         |  |  |                        |           |      |                           |           |      |                         |          |      |                     |           |      |                       |           |      |                         |           |      |                         |           |    |                   |           |    |                              |           |    |                     |           |    |                                 |           |    |                                 |           |    |                           |           |    |                         |  |  |                      |            |              |                       |          |              |                    |           |    |
|---------------------------------|------------------------------------------------------------------------------------------------------------------------------------------------------------------------------------------------------------------------------------------------------------------------------------------------------------------------------------------------------------------------------------------------------------------------------------------------------------------------------------------------------------------------------------------------------------------------------------------------------------------------------------------------------------------------------------------------------------------------------------------------------------------------------------------------------------------------------------------------------------------------------------------------------------------------------------------------------------------------------------------------------------------------------------------------------------------------------------------------------------------------------------------------------------------------------------------------------------------------------------------------------------------------------------------------------------------------------------------------------------------------------------------------------------------------------------------------------------------------------------------------------------------------------------------------------------------------------------------------------------------------------------------------------------------------------------------------------------------------------------------------------------------------------------------------------------------------------------------------------------------------------------------------------------------------------------------------------------------------------------------------------------------------------------------------------------------------------------------------------------------------------------------------------------------------------------------------------------------------------------------------------------------------------------------------------------------------------------------------------------------------------------------------------------------------------------------------------------------------------------------------------------------------------------------------------------------------------------------------------------------------------------------------------------------------------------------------------------------------------------------------------------------------------------------------------------------------------------------------------------------------------------------------------------------------------------------------------------------------------------------------------------------------------------------------------------------------------------------------------------------------------------------------------------------------------------------------------------------------------------------------------------------------------------------------------------------------------------------------------------------------------------------------------------------------------------------------------------------------------------------------------------------------------------------------------------------------------------------------------------------------------------------------------------------------------------------------------------------------------------------------------------------------------------------------------------|--------------|---------------------------------------|---------------------------------------|-----------------------------------|--|--|-------------------------|----------|-----|--------------------|-----------|-----|----------------------|-----------|-----|-------------------------|-----------|-----|---------------------------|-----------|----|-------------------------|-----------|-----|-----------------------------|-----------|-----|----------------------------|-----------|-----|-----------------------------------------|--|--|------------------------|-----------|------|---------------------------|-----------|------|-------------------------|----------|------|---------------------|-----------|------|-----------------------|-----------|------|-------------------------|-----------|------|-------------------------|-----------|----|-------------------|-----------|----|------------------------------|-----------|----|---------------------|-----------|----|---------------------------------|-----------|----|---------------------------------|-----------|----|---------------------------|-----------|----|-------------------------|--|--|----------------------|------------|--------------|-----------------------|----------|--------------|--------------------|-----------|----|
| <b>Outcome/Key findings</b>     | <p>HPHC in mainstream IQOS aerosol compared with reference cigarette smoke</p>                                                                                                                                                                                                                                                                                                                                                                                                                                                                                                                                                                                                                                                                                                                                                                                                                                                                                                                                                                                                                                                                                                                                                                                                                                                                                                                                                                                                                                                                                                                                                                                                                                                                                                                                                                                                                                                                                                                                                                                                                                                                                                                                                                                                                                                                                                                                                                                                                                                                                                                                                                                                                                                                                                                                                                                                                                                                                                                                                                                                                                                                                                                                                                                                                                                                                                                                                                                                                                                                                                                                                                                                                                                                                                                             |              |                                       |                                       |                                   |  |  |                         |          |     |                    |           |     |                      |           |     |                         |           |     |                           |           |    |                         |           |     |                             |           |     |                            |           |     |                                         |  |  |                        |           |      |                           |           |      |                         |          |      |                     |           |      |                       |           |      |                         |           |      |                         |           |    |                   |           |    |                              |           |    |                     |           |    |                                 |           |    |                                 |           |    |                           |           |    |                         |  |  |                      |            |              |                       |          |              |                    |           |    |
|                                 | <table border="1" style="width: 100%; border-collapse: collapse;"> <thead> <tr> <th style="text-align: center;">HPHC</th> <th style="text-align: center;">Mean (SD)</th> <th style="text-align: center;">% ratio HnB aerosol : cigarette smoke</th> </tr> </thead> <tbody> <tr> <td colspan="3"><b>Volatile organic compounds</b></td> </tr> <tr> <td>Acetaldehyde (µg/stick)</td> <td style="text-align: center;">133 (35)</td> <td style="text-align: center;">22%</td> </tr> <tr> <td>Acetone (µg/stick)</td> <td style="text-align: center;">12 (12.9)</td> <td style="text-align: center;">13%</td> </tr> <tr> <td>Acroleine (µg/stick)</td> <td style="text-align: center;">0.9 (0.6)</td> <td style="text-align: center;">82%</td> </tr> <tr> <td>Benzaldehyde (µg/stick)</td> <td style="text-align: center;">1.2 (1.4)</td> <td style="text-align: center;">50%</td> </tr> <tr> <td>Crotonaldehyde (µg/stick)</td> <td style="text-align: center;">0.7 (0.9)</td> <td style="text-align: center;">4%</td> </tr> <tr> <td>Formaldehyde (µg/stick)</td> <td style="text-align: center;">3.2 (2.7)</td> <td style="text-align: center;">74%</td> </tr> <tr> <td>Isovaleraldehyde (µg/stick)</td> <td style="text-align: center;">3.5 (3.1)</td> <td style="text-align: center;">41%</td> </tr> <tr> <td>Propionaldehyde (µg/stick)</td> <td style="text-align: center;">7.8 (4.3)</td> <td style="text-align: center;">26%</td> </tr> <tr> <td colspan="3"><b>Polycyclic aromatic hydrocarbons</b></td> </tr> <tr> <td>Naphthalene (ng/stick)</td> <td style="text-align: center;">1.6 (0.5)</td> <td style="text-align: center;">0.1%</td> </tr> <tr> <td>Acenaphthylene (ng/stick)</td> <td style="text-align: center;">1.9 (0.6)</td> <td style="text-align: center;">0.8%</td> </tr> <tr> <td>Acenaphthene (ng/stick)</td> <td style="text-align: center;">145 (54)</td> <td style="text-align: center;">295%</td> </tr> <tr> <td>Fluorene (ng/stick)</td> <td style="text-align: center;">1.5 (0.6)</td> <td style="text-align: center;">0.4%</td> </tr> <tr> <td>Anthracene (ng/stick)</td> <td style="text-align: center;">0.3 (0.1)</td> <td style="text-align: center;">0.2%</td> </tr> <tr> <td>Phenanthrene (ng/stick)</td> <td style="text-align: center;">2.0 (0.2)</td> <td style="text-align: center;">0.7%</td> </tr> <tr> <td>Fluoranthene (ng/stick)</td> <td style="text-align: center;">7.3 (1.1)</td> <td style="text-align: center;">6%</td> </tr> <tr> <td>Pyrene (ng/stick)</td> <td style="text-align: center;">6.4 (1.1)</td> <td style="text-align: center;">7%</td> </tr> <tr> <td>Benz[a]anthracene (ng/stick)</td> <td style="text-align: center;">1.8 (0.4)</td> <td style="text-align: center;">6%</td> </tr> <tr> <td>Chrysene (ng/stick)</td> <td style="text-align: center;">1.5 (0.3)</td> <td style="text-align: center;">3%</td> </tr> <tr> <td>Benzo[b]fluoranthene (ng/stick)</td> <td style="text-align: center;">0.5 (0.2)</td> <td style="text-align: center;">2%</td> </tr> <tr> <td>Benzo[k]fluoranthene (ng/stick)</td> <td style="text-align: center;">0.4 (0.2)</td> <td style="text-align: center;">9%</td> </tr> <tr> <td>Benzo[a]pyrene (ng/stick)</td> <td style="text-align: center;">0.8 (0.1)</td> <td style="text-align: center;">4%</td> </tr> <tr> <td colspan="3"><b>Other inorganics</b></td> </tr> <tr> <td>Carbon dioxide (ppm)</td> <td style="text-align: center;">3057 (532)</td> <td style="text-align: center;">Not analysed</td> </tr> <tr> <td>Carbon monoxide (ppm)</td> <td style="text-align: center;">328 (76)</td> <td style="text-align: center;">Not analysed</td> </tr> <tr> <td>Nitric oxide (ppm)</td> <td style="text-align: center;">5.5 (1.5)</td> <td style="text-align: center;">6%</td> </tr> </tbody> </table> | HPHC         | Mean (SD)                             | % ratio HnB aerosol : cigarette smoke | <b>Volatile organic compounds</b> |  |  | Acetaldehyde (µg/stick) | 133 (35) | 22% | Acetone (µg/stick) | 12 (12.9) | 13% | Acroleine (µg/stick) | 0.9 (0.6) | 82% | Benzaldehyde (µg/stick) | 1.2 (1.4) | 50% | Crotonaldehyde (µg/stick) | 0.7 (0.9) | 4% | Formaldehyde (µg/stick) | 3.2 (2.7) | 74% | Isovaleraldehyde (µg/stick) | 3.5 (3.1) | 41% | Propionaldehyde (µg/stick) | 7.8 (4.3) | 26% | <b>Polycyclic aromatic hydrocarbons</b> |  |  | Naphthalene (ng/stick) | 1.6 (0.5) | 0.1% | Acenaphthylene (ng/stick) | 1.9 (0.6) | 0.8% | Acenaphthene (ng/stick) | 145 (54) | 295% | Fluorene (ng/stick) | 1.5 (0.6) | 0.4% | Anthracene (ng/stick) | 0.3 (0.1) | 0.2% | Phenanthrene (ng/stick) | 2.0 (0.2) | 0.7% | Fluoranthene (ng/stick) | 7.3 (1.1) | 6% | Pyrene (ng/stick) | 6.4 (1.1) | 7% | Benz[a]anthracene (ng/stick) | 1.8 (0.4) | 6% | Chrysene (ng/stick) | 1.5 (0.3) | 3% | Benzo[b]fluoranthene (ng/stick) | 0.5 (0.2) | 2% | Benzo[k]fluoranthene (ng/stick) | 0.4 (0.2) | 9% | Benzo[a]pyrene (ng/stick) | 0.8 (0.1) | 4% | <b>Other inorganics</b> |  |  | Carbon dioxide (ppm) | 3057 (532) | Not analysed | Carbon monoxide (ppm) | 328 (76) | Not analysed | Nitric oxide (ppm) | 5.5 (1.5) | 6% |
|                                 | HPHC                                                                                                                                                                                                                                                                                                                                                                                                                                                                                                                                                                                                                                                                                                                                                                                                                                                                                                                                                                                                                                                                                                                                                                                                                                                                                                                                                                                                                                                                                                                                                                                                                                                                                                                                                                                                                                                                                                                                                                                                                                                                                                                                                                                                                                                                                                                                                                                                                                                                                                                                                                                                                                                                                                                                                                                                                                                                                                                                                                                                                                                                                                                                                                                                                                                                                                                                                                                                                                                                                                                                                                                                                                                                                                                                                                                                       | Mean (SD)    | % ratio HnB aerosol : cigarette smoke |                                       |                                   |  |  |                         |          |     |                    |           |     |                      |           |     |                         |           |     |                           |           |    |                         |           |     |                             |           |     |                            |           |     |                                         |  |  |                        |           |      |                           |           |      |                         |          |      |                     |           |      |                       |           |      |                         |           |      |                         |           |    |                   |           |    |                              |           |    |                     |           |    |                                 |           |    |                                 |           |    |                           |           |    |                         |  |  |                      |            |              |                       |          |              |                    |           |    |
|                                 | <b>Volatile organic compounds</b>                                                                                                                                                                                                                                                                                                                                                                                                                                                                                                                                                                                                                                                                                                                                                                                                                                                                                                                                                                                                                                                                                                                                                                                                                                                                                                                                                                                                                                                                                                                                                                                                                                                                                                                                                                                                                                                                                                                                                                                                                                                                                                                                                                                                                                                                                                                                                                                                                                                                                                                                                                                                                                                                                                                                                                                                                                                                                                                                                                                                                                                                                                                                                                                                                                                                                                                                                                                                                                                                                                                                                                                                                                                                                                                                                                          |              |                                       |                                       |                                   |  |  |                         |          |     |                    |           |     |                      |           |     |                         |           |     |                           |           |    |                         |           |     |                             |           |     |                            |           |     |                                         |  |  |                        |           |      |                           |           |      |                         |          |      |                     |           |      |                       |           |      |                         |           |      |                         |           |    |                   |           |    |                              |           |    |                     |           |    |                                 |           |    |                                 |           |    |                           |           |    |                         |  |  |                      |            |              |                       |          |              |                    |           |    |
|                                 | Acetaldehyde (µg/stick)                                                                                                                                                                                                                                                                                                                                                                                                                                                                                                                                                                                                                                                                                                                                                                                                                                                                                                                                                                                                                                                                                                                                                                                                                                                                                                                                                                                                                                                                                                                                                                                                                                                                                                                                                                                                                                                                                                                                                                                                                                                                                                                                                                                                                                                                                                                                                                                                                                                                                                                                                                                                                                                                                                                                                                                                                                                                                                                                                                                                                                                                                                                                                                                                                                                                                                                                                                                                                                                                                                                                                                                                                                                                                                                                                                                    | 133 (35)     | 22%                                   |                                       |                                   |  |  |                         |          |     |                    |           |     |                      |           |     |                         |           |     |                           |           |    |                         |           |     |                             |           |     |                            |           |     |                                         |  |  |                        |           |      |                           |           |      |                         |          |      |                     |           |      |                       |           |      |                         |           |      |                         |           |    |                   |           |    |                              |           |    |                     |           |    |                                 |           |    |                                 |           |    |                           |           |    |                         |  |  |                      |            |              |                       |          |              |                    |           |    |
|                                 | Acetone (µg/stick)                                                                                                                                                                                                                                                                                                                                                                                                                                                                                                                                                                                                                                                                                                                                                                                                                                                                                                                                                                                                                                                                                                                                                                                                                                                                                                                                                                                                                                                                                                                                                                                                                                                                                                                                                                                                                                                                                                                                                                                                                                                                                                                                                                                                                                                                                                                                                                                                                                                                                                                                                                                                                                                                                                                                                                                                                                                                                                                                                                                                                                                                                                                                                                                                                                                                                                                                                                                                                                                                                                                                                                                                                                                                                                                                                                                         | 12 (12.9)    | 13%                                   |                                       |                                   |  |  |                         |          |     |                    |           |     |                      |           |     |                         |           |     |                           |           |    |                         |           |     |                             |           |     |                            |           |     |                                         |  |  |                        |           |      |                           |           |      |                         |          |      |                     |           |      |                       |           |      |                         |           |      |                         |           |    |                   |           |    |                              |           |    |                     |           |    |                                 |           |    |                                 |           |    |                           |           |    |                         |  |  |                      |            |              |                       |          |              |                    |           |    |
|                                 | Acroleine (µg/stick)                                                                                                                                                                                                                                                                                                                                                                                                                                                                                                                                                                                                                                                                                                                                                                                                                                                                                                                                                                                                                                                                                                                                                                                                                                                                                                                                                                                                                                                                                                                                                                                                                                                                                                                                                                                                                                                                                                                                                                                                                                                                                                                                                                                                                                                                                                                                                                                                                                                                                                                                                                                                                                                                                                                                                                                                                                                                                                                                                                                                                                                                                                                                                                                                                                                                                                                                                                                                                                                                                                                                                                                                                                                                                                                                                                                       | 0.9 (0.6)    | 82%                                   |                                       |                                   |  |  |                         |          |     |                    |           |     |                      |           |     |                         |           |     |                           |           |    |                         |           |     |                             |           |     |                            |           |     |                                         |  |  |                        |           |      |                           |           |      |                         |          |      |                     |           |      |                       |           |      |                         |           |      |                         |           |    |                   |           |    |                              |           |    |                     |           |    |                                 |           |    |                                 |           |    |                           |           |    |                         |  |  |                      |            |              |                       |          |              |                    |           |    |
|                                 | Benzaldehyde (µg/stick)                                                                                                                                                                                                                                                                                                                                                                                                                                                                                                                                                                                                                                                                                                                                                                                                                                                                                                                                                                                                                                                                                                                                                                                                                                                                                                                                                                                                                                                                                                                                                                                                                                                                                                                                                                                                                                                                                                                                                                                                                                                                                                                                                                                                                                                                                                                                                                                                                                                                                                                                                                                                                                                                                                                                                                                                                                                                                                                                                                                                                                                                                                                                                                                                                                                                                                                                                                                                                                                                                                                                                                                                                                                                                                                                                                                    | 1.2 (1.4)    | 50%                                   |                                       |                                   |  |  |                         |          |     |                    |           |     |                      |           |     |                         |           |     |                           |           |    |                         |           |     |                             |           |     |                            |           |     |                                         |  |  |                        |           |      |                           |           |      |                         |          |      |                     |           |      |                       |           |      |                         |           |      |                         |           |    |                   |           |    |                              |           |    |                     |           |    |                                 |           |    |                                 |           |    |                           |           |    |                         |  |  |                      |            |              |                       |          |              |                    |           |    |
|                                 | Crotonaldehyde (µg/stick)                                                                                                                                                                                                                                                                                                                                                                                                                                                                                                                                                                                                                                                                                                                                                                                                                                                                                                                                                                                                                                                                                                                                                                                                                                                                                                                                                                                                                                                                                                                                                                                                                                                                                                                                                                                                                                                                                                                                                                                                                                                                                                                                                                                                                                                                                                                                                                                                                                                                                                                                                                                                                                                                                                                                                                                                                                                                                                                                                                                                                                                                                                                                                                                                                                                                                                                                                                                                                                                                                                                                                                                                                                                                                                                                                                                  | 0.7 (0.9)    | 4%                                    |                                       |                                   |  |  |                         |          |     |                    |           |     |                      |           |     |                         |           |     |                           |           |    |                         |           |     |                             |           |     |                            |           |     |                                         |  |  |                        |           |      |                           |           |      |                         |          |      |                     |           |      |                       |           |      |                         |           |      |                         |           |    |                   |           |    |                              |           |    |                     |           |    |                                 |           |    |                                 |           |    |                           |           |    |                         |  |  |                      |            |              |                       |          |              |                    |           |    |
|                                 | Formaldehyde (µg/stick)                                                                                                                                                                                                                                                                                                                                                                                                                                                                                                                                                                                                                                                                                                                                                                                                                                                                                                                                                                                                                                                                                                                                                                                                                                                                                                                                                                                                                                                                                                                                                                                                                                                                                                                                                                                                                                                                                                                                                                                                                                                                                                                                                                                                                                                                                                                                                                                                                                                                                                                                                                                                                                                                                                                                                                                                                                                                                                                                                                                                                                                                                                                                                                                                                                                                                                                                                                                                                                                                                                                                                                                                                                                                                                                                                                                    | 3.2 (2.7)    | 74%                                   |                                       |                                   |  |  |                         |          |     |                    |           |     |                      |           |     |                         |           |     |                           |           |    |                         |           |     |                             |           |     |                            |           |     |                                         |  |  |                        |           |      |                           |           |      |                         |          |      |                     |           |      |                       |           |      |                         |           |      |                         |           |    |                   |           |    |                              |           |    |                     |           |    |                                 |           |    |                                 |           |    |                           |           |    |                         |  |  |                      |            |              |                       |          |              |                    |           |    |
|                                 | Isovaleraldehyde (µg/stick)                                                                                                                                                                                                                                                                                                                                                                                                                                                                                                                                                                                                                                                                                                                                                                                                                                                                                                                                                                                                                                                                                                                                                                                                                                                                                                                                                                                                                                                                                                                                                                                                                                                                                                                                                                                                                                                                                                                                                                                                                                                                                                                                                                                                                                                                                                                                                                                                                                                                                                                                                                                                                                                                                                                                                                                                                                                                                                                                                                                                                                                                                                                                                                                                                                                                                                                                                                                                                                                                                                                                                                                                                                                                                                                                                                                | 3.5 (3.1)    | 41%                                   |                                       |                                   |  |  |                         |          |     |                    |           |     |                      |           |     |                         |           |     |                           |           |    |                         |           |     |                             |           |     |                            |           |     |                                         |  |  |                        |           |      |                           |           |      |                         |          |      |                     |           |      |                       |           |      |                         |           |      |                         |           |    |                   |           |    |                              |           |    |                     |           |    |                                 |           |    |                                 |           |    |                           |           |    |                         |  |  |                      |            |              |                       |          |              |                    |           |    |
|                                 | Propionaldehyde (µg/stick)                                                                                                                                                                                                                                                                                                                                                                                                                                                                                                                                                                                                                                                                                                                                                                                                                                                                                                                                                                                                                                                                                                                                                                                                                                                                                                                                                                                                                                                                                                                                                                                                                                                                                                                                                                                                                                                                                                                                                                                                                                                                                                                                                                                                                                                                                                                                                                                                                                                                                                                                                                                                                                                                                                                                                                                                                                                                                                                                                                                                                                                                                                                                                                                                                                                                                                                                                                                                                                                                                                                                                                                                                                                                                                                                                                                 | 7.8 (4.3)    | 26%                                   |                                       |                                   |  |  |                         |          |     |                    |           |     |                      |           |     |                         |           |     |                           |           |    |                         |           |     |                             |           |     |                            |           |     |                                         |  |  |                        |           |      |                           |           |      |                         |          |      |                     |           |      |                       |           |      |                         |           |      |                         |           |    |                   |           |    |                              |           |    |                     |           |    |                                 |           |    |                                 |           |    |                           |           |    |                         |  |  |                      |            |              |                       |          |              |                    |           |    |
|                                 | <b>Polycyclic aromatic hydrocarbons</b>                                                                                                                                                                                                                                                                                                                                                                                                                                                                                                                                                                                                                                                                                                                                                                                                                                                                                                                                                                                                                                                                                                                                                                                                                                                                                                                                                                                                                                                                                                                                                                                                                                                                                                                                                                                                                                                                                                                                                                                                                                                                                                                                                                                                                                                                                                                                                                                                                                                                                                                                                                                                                                                                                                                                                                                                                                                                                                                                                                                                                                                                                                                                                                                                                                                                                                                                                                                                                                                                                                                                                                                                                                                                                                                                                                    |              |                                       |                                       |                                   |  |  |                         |          |     |                    |           |     |                      |           |     |                         |           |     |                           |           |    |                         |           |     |                             |           |     |                            |           |     |                                         |  |  |                        |           |      |                           |           |      |                         |          |      |                     |           |      |                       |           |      |                         |           |      |                         |           |    |                   |           |    |                              |           |    |                     |           |    |                                 |           |    |                                 |           |    |                           |           |    |                         |  |  |                      |            |              |                       |          |              |                    |           |    |
|                                 | Naphthalene (ng/stick)                                                                                                                                                                                                                                                                                                                                                                                                                                                                                                                                                                                                                                                                                                                                                                                                                                                                                                                                                                                                                                                                                                                                                                                                                                                                                                                                                                                                                                                                                                                                                                                                                                                                                                                                                                                                                                                                                                                                                                                                                                                                                                                                                                                                                                                                                                                                                                                                                                                                                                                                                                                                                                                                                                                                                                                                                                                                                                                                                                                                                                                                                                                                                                                                                                                                                                                                                                                                                                                                                                                                                                                                                                                                                                                                                                                     | 1.6 (0.5)    | 0.1%                                  |                                       |                                   |  |  |                         |          |     |                    |           |     |                      |           |     |                         |           |     |                           |           |    |                         |           |     |                             |           |     |                            |           |     |                                         |  |  |                        |           |      |                           |           |      |                         |          |      |                     |           |      |                       |           |      |                         |           |      |                         |           |    |                   |           |    |                              |           |    |                     |           |    |                                 |           |    |                                 |           |    |                           |           |    |                         |  |  |                      |            |              |                       |          |              |                    |           |    |
|                                 | Acenaphthylene (ng/stick)                                                                                                                                                                                                                                                                                                                                                                                                                                                                                                                                                                                                                                                                                                                                                                                                                                                                                                                                                                                                                                                                                                                                                                                                                                                                                                                                                                                                                                                                                                                                                                                                                                                                                                                                                                                                                                                                                                                                                                                                                                                                                                                                                                                                                                                                                                                                                                                                                                                                                                                                                                                                                                                                                                                                                                                                                                                                                                                                                                                                                                                                                                                                                                                                                                                                                                                                                                                                                                                                                                                                                                                                                                                                                                                                                                                  | 1.9 (0.6)    | 0.8%                                  |                                       |                                   |  |  |                         |          |     |                    |           |     |                      |           |     |                         |           |     |                           |           |    |                         |           |     |                             |           |     |                            |           |     |                                         |  |  |                        |           |      |                           |           |      |                         |          |      |                     |           |      |                       |           |      |                         |           |      |                         |           |    |                   |           |    |                              |           |    |                     |           |    |                                 |           |    |                                 |           |    |                           |           |    |                         |  |  |                      |            |              |                       |          |              |                    |           |    |
|                                 | Acenaphthene (ng/stick)                                                                                                                                                                                                                                                                                                                                                                                                                                                                                                                                                                                                                                                                                                                                                                                                                                                                                                                                                                                                                                                                                                                                                                                                                                                                                                                                                                                                                                                                                                                                                                                                                                                                                                                                                                                                                                                                                                                                                                                                                                                                                                                                                                                                                                                                                                                                                                                                                                                                                                                                                                                                                                                                                                                                                                                                                                                                                                                                                                                                                                                                                                                                                                                                                                                                                                                                                                                                                                                                                                                                                                                                                                                                                                                                                                                    | 145 (54)     | 295%                                  |                                       |                                   |  |  |                         |          |     |                    |           |     |                      |           |     |                         |           |     |                           |           |    |                         |           |     |                             |           |     |                            |           |     |                                         |  |  |                        |           |      |                           |           |      |                         |          |      |                     |           |      |                       |           |      |                         |           |      |                         |           |    |                   |           |    |                              |           |    |                     |           |    |                                 |           |    |                                 |           |    |                           |           |    |                         |  |  |                      |            |              |                       |          |              |                    |           |    |
|                                 | Fluorene (ng/stick)                                                                                                                                                                                                                                                                                                                                                                                                                                                                                                                                                                                                                                                                                                                                                                                                                                                                                                                                                                                                                                                                                                                                                                                                                                                                                                                                                                                                                                                                                                                                                                                                                                                                                                                                                                                                                                                                                                                                                                                                                                                                                                                                                                                                                                                                                                                                                                                                                                                                                                                                                                                                                                                                                                                                                                                                                                                                                                                                                                                                                                                                                                                                                                                                                                                                                                                                                                                                                                                                                                                                                                                                                                                                                                                                                                                        | 1.5 (0.6)    | 0.4%                                  |                                       |                                   |  |  |                         |          |     |                    |           |     |                      |           |     |                         |           |     |                           |           |    |                         |           |     |                             |           |     |                            |           |     |                                         |  |  |                        |           |      |                           |           |      |                         |          |      |                     |           |      |                       |           |      |                         |           |      |                         |           |    |                   |           |    |                              |           |    |                     |           |    |                                 |           |    |                                 |           |    |                           |           |    |                         |  |  |                      |            |              |                       |          |              |                    |           |    |
|                                 | Anthracene (ng/stick)                                                                                                                                                                                                                                                                                                                                                                                                                                                                                                                                                                                                                                                                                                                                                                                                                                                                                                                                                                                                                                                                                                                                                                                                                                                                                                                                                                                                                                                                                                                                                                                                                                                                                                                                                                                                                                                                                                                                                                                                                                                                                                                                                                                                                                                                                                                                                                                                                                                                                                                                                                                                                                                                                                                                                                                                                                                                                                                                                                                                                                                                                                                                                                                                                                                                                                                                                                                                                                                                                                                                                                                                                                                                                                                                                                                      | 0.3 (0.1)    | 0.2%                                  |                                       |                                   |  |  |                         |          |     |                    |           |     |                      |           |     |                         |           |     |                           |           |    |                         |           |     |                             |           |     |                            |           |     |                                         |  |  |                        |           |      |                           |           |      |                         |          |      |                     |           |      |                       |           |      |                         |           |      |                         |           |    |                   |           |    |                              |           |    |                     |           |    |                                 |           |    |                                 |           |    |                           |           |    |                         |  |  |                      |            |              |                       |          |              |                    |           |    |
|                                 | Phenanthrene (ng/stick)                                                                                                                                                                                                                                                                                                                                                                                                                                                                                                                                                                                                                                                                                                                                                                                                                                                                                                                                                                                                                                                                                                                                                                                                                                                                                                                                                                                                                                                                                                                                                                                                                                                                                                                                                                                                                                                                                                                                                                                                                                                                                                                                                                                                                                                                                                                                                                                                                                                                                                                                                                                                                                                                                                                                                                                                                                                                                                                                                                                                                                                                                                                                                                                                                                                                                                                                                                                                                                                                                                                                                                                                                                                                                                                                                                                    | 2.0 (0.2)    | 0.7%                                  |                                       |                                   |  |  |                         |          |     |                    |           |     |                      |           |     |                         |           |     |                           |           |    |                         |           |     |                             |           |     |                            |           |     |                                         |  |  |                        |           |      |                           |           |      |                         |          |      |                     |           |      |                       |           |      |                         |           |      |                         |           |    |                   |           |    |                              |           |    |                     |           |    |                                 |           |    |                                 |           |    |                           |           |    |                         |  |  |                      |            |              |                       |          |              |                    |           |    |
|                                 | Fluoranthene (ng/stick)                                                                                                                                                                                                                                                                                                                                                                                                                                                                                                                                                                                                                                                                                                                                                                                                                                                                                                                                                                                                                                                                                                                                                                                                                                                                                                                                                                                                                                                                                                                                                                                                                                                                                                                                                                                                                                                                                                                                                                                                                                                                                                                                                                                                                                                                                                                                                                                                                                                                                                                                                                                                                                                                                                                                                                                                                                                                                                                                                                                                                                                                                                                                                                                                                                                                                                                                                                                                                                                                                                                                                                                                                                                                                                                                                                                    | 7.3 (1.1)    | 6%                                    |                                       |                                   |  |  |                         |          |     |                    |           |     |                      |           |     |                         |           |     |                           |           |    |                         |           |     |                             |           |     |                            |           |     |                                         |  |  |                        |           |      |                           |           |      |                         |          |      |                     |           |      |                       |           |      |                         |           |      |                         |           |    |                   |           |    |                              |           |    |                     |           |    |                                 |           |    |                                 |           |    |                           |           |    |                         |  |  |                      |            |              |                       |          |              |                    |           |    |
| Pyrene (ng/stick)               | 6.4 (1.1)                                                                                                                                                                                                                                                                                                                                                                                                                                                                                                                                                                                                                                                                                                                                                                                                                                                                                                                                                                                                                                                                                                                                                                                                                                                                                                                                                                                                                                                                                                                                                                                                                                                                                                                                                                                                                                                                                                                                                                                                                                                                                                                                                                                                                                                                                                                                                                                                                                                                                                                                                                                                                                                                                                                                                                                                                                                                                                                                                                                                                                                                                                                                                                                                                                                                                                                                                                                                                                                                                                                                                                                                                                                                                                                                                                                                  | 7%           |                                       |                                       |                                   |  |  |                         |          |     |                    |           |     |                      |           |     |                         |           |     |                           |           |    |                         |           |     |                             |           |     |                            |           |     |                                         |  |  |                        |           |      |                           |           |      |                         |          |      |                     |           |      |                       |           |      |                         |           |      |                         |           |    |                   |           |    |                              |           |    |                     |           |    |                                 |           |    |                                 |           |    |                           |           |    |                         |  |  |                      |            |              |                       |          |              |                    |           |    |
| Benz[a]anthracene (ng/stick)    | 1.8 (0.4)                                                                                                                                                                                                                                                                                                                                                                                                                                                                                                                                                                                                                                                                                                                                                                                                                                                                                                                                                                                                                                                                                                                                                                                                                                                                                                                                                                                                                                                                                                                                                                                                                                                                                                                                                                                                                                                                                                                                                                                                                                                                                                                                                                                                                                                                                                                                                                                                                                                                                                                                                                                                                                                                                                                                                                                                                                                                                                                                                                                                                                                                                                                                                                                                                                                                                                                                                                                                                                                                                                                                                                                                                                                                                                                                                                                                  | 6%           |                                       |                                       |                                   |  |  |                         |          |     |                    |           |     |                      |           |     |                         |           |     |                           |           |    |                         |           |     |                             |           |     |                            |           |     |                                         |  |  |                        |           |      |                           |           |      |                         |          |      |                     |           |      |                       |           |      |                         |           |      |                         |           |    |                   |           |    |                              |           |    |                     |           |    |                                 |           |    |                                 |           |    |                           |           |    |                         |  |  |                      |            |              |                       |          |              |                    |           |    |
| Chrysene (ng/stick)             | 1.5 (0.3)                                                                                                                                                                                                                                                                                                                                                                                                                                                                                                                                                                                                                                                                                                                                                                                                                                                                                                                                                                                                                                                                                                                                                                                                                                                                                                                                                                                                                                                                                                                                                                                                                                                                                                                                                                                                                                                                                                                                                                                                                                                                                                                                                                                                                                                                                                                                                                                                                                                                                                                                                                                                                                                                                                                                                                                                                                                                                                                                                                                                                                                                                                                                                                                                                                                                                                                                                                                                                                                                                                                                                                                                                                                                                                                                                                                                  | 3%           |                                       |                                       |                                   |  |  |                         |          |     |                    |           |     |                      |           |     |                         |           |     |                           |           |    |                         |           |     |                             |           |     |                            |           |     |                                         |  |  |                        |           |      |                           |           |      |                         |          |      |                     |           |      |                       |           |      |                         |           |      |                         |           |    |                   |           |    |                              |           |    |                     |           |    |                                 |           |    |                                 |           |    |                           |           |    |                         |  |  |                      |            |              |                       |          |              |                    |           |    |
| Benzo[b]fluoranthene (ng/stick) | 0.5 (0.2)                                                                                                                                                                                                                                                                                                                                                                                                                                                                                                                                                                                                                                                                                                                                                                                                                                                                                                                                                                                                                                                                                                                                                                                                                                                                                                                                                                                                                                                                                                                                                                                                                                                                                                                                                                                                                                                                                                                                                                                                                                                                                                                                                                                                                                                                                                                                                                                                                                                                                                                                                                                                                                                                                                                                                                                                                                                                                                                                                                                                                                                                                                                                                                                                                                                                                                                                                                                                                                                                                                                                                                                                                                                                                                                                                                                                  | 2%           |                                       |                                       |                                   |  |  |                         |          |     |                    |           |     |                      |           |     |                         |           |     |                           |           |    |                         |           |     |                             |           |     |                            |           |     |                                         |  |  |                        |           |      |                           |           |      |                         |          |      |                     |           |      |                       |           |      |                         |           |      |                         |           |    |                   |           |    |                              |           |    |                     |           |    |                                 |           |    |                                 |           |    |                           |           |    |                         |  |  |                      |            |              |                       |          |              |                    |           |    |
| Benzo[k]fluoranthene (ng/stick) | 0.4 (0.2)                                                                                                                                                                                                                                                                                                                                                                                                                                                                                                                                                                                                                                                                                                                                                                                                                                                                                                                                                                                                                                                                                                                                                                                                                                                                                                                                                                                                                                                                                                                                                                                                                                                                                                                                                                                                                                                                                                                                                                                                                                                                                                                                                                                                                                                                                                                                                                                                                                                                                                                                                                                                                                                                                                                                                                                                                                                                                                                                                                                                                                                                                                                                                                                                                                                                                                                                                                                                                                                                                                                                                                                                                                                                                                                                                                                                  | 9%           |                                       |                                       |                                   |  |  |                         |          |     |                    |           |     |                      |           |     |                         |           |     |                           |           |    |                         |           |     |                             |           |     |                            |           |     |                                         |  |  |                        |           |      |                           |           |      |                         |          |      |                     |           |      |                       |           |      |                         |           |      |                         |           |    |                   |           |    |                              |           |    |                     |           |    |                                 |           |    |                                 |           |    |                           |           |    |                         |  |  |                      |            |              |                       |          |              |                    |           |    |
| Benzo[a]pyrene (ng/stick)       | 0.8 (0.1)                                                                                                                                                                                                                                                                                                                                                                                                                                                                                                                                                                                                                                                                                                                                                                                                                                                                                                                                                                                                                                                                                                                                                                                                                                                                                                                                                                                                                                                                                                                                                                                                                                                                                                                                                                                                                                                                                                                                                                                                                                                                                                                                                                                                                                                                                                                                                                                                                                                                                                                                                                                                                                                                                                                                                                                                                                                                                                                                                                                                                                                                                                                                                                                                                                                                                                                                                                                                                                                                                                                                                                                                                                                                                                                                                                                                  | 4%           |                                       |                                       |                                   |  |  |                         |          |     |                    |           |     |                      |           |     |                         |           |     |                           |           |    |                         |           |     |                             |           |     |                            |           |     |                                         |  |  |                        |           |      |                           |           |      |                         |          |      |                     |           |      |                       |           |      |                         |           |      |                         |           |    |                   |           |    |                              |           |    |                     |           |    |                                 |           |    |                                 |           |    |                           |           |    |                         |  |  |                      |            |              |                       |          |              |                    |           |    |
| <b>Other inorganics</b>         |                                                                                                                                                                                                                                                                                                                                                                                                                                                                                                                                                                                                                                                                                                                                                                                                                                                                                                                                                                                                                                                                                                                                                                                                                                                                                                                                                                                                                                                                                                                                                                                                                                                                                                                                                                                                                                                                                                                                                                                                                                                                                                                                                                                                                                                                                                                                                                                                                                                                                                                                                                                                                                                                                                                                                                                                                                                                                                                                                                                                                                                                                                                                                                                                                                                                                                                                                                                                                                                                                                                                                                                                                                                                                                                                                                                                            |              |                                       |                                       |                                   |  |  |                         |          |     |                    |           |     |                      |           |     |                         |           |     |                           |           |    |                         |           |     |                             |           |     |                            |           |     |                                         |  |  |                        |           |      |                           |           |      |                         |          |      |                     |           |      |                       |           |      |                         |           |      |                         |           |    |                   |           |    |                              |           |    |                     |           |    |                                 |           |    |                                 |           |    |                           |           |    |                         |  |  |                      |            |              |                       |          |              |                    |           |    |
| Carbon dioxide (ppm)            | 3057 (532)                                                                                                                                                                                                                                                                                                                                                                                                                                                                                                                                                                                                                                                                                                                                                                                                                                                                                                                                                                                                                                                                                                                                                                                                                                                                                                                                                                                                                                                                                                                                                                                                                                                                                                                                                                                                                                                                                                                                                                                                                                                                                                                                                                                                                                                                                                                                                                                                                                                                                                                                                                                                                                                                                                                                                                                                                                                                                                                                                                                                                                                                                                                                                                                                                                                                                                                                                                                                                                                                                                                                                                                                                                                                                                                                                                                                 | Not analysed |                                       |                                       |                                   |  |  |                         |          |     |                    |           |     |                      |           |     |                         |           |     |                           |           |    |                         |           |     |                             |           |     |                            |           |     |                                         |  |  |                        |           |      |                           |           |      |                         |          |      |                     |           |      |                       |           |      |                         |           |      |                         |           |    |                   |           |    |                              |           |    |                     |           |    |                                 |           |    |                                 |           |    |                           |           |    |                         |  |  |                      |            |              |                       |          |              |                    |           |    |
| Carbon monoxide (ppm)           | 328 (76)                                                                                                                                                                                                                                                                                                                                                                                                                                                                                                                                                                                                                                                                                                                                                                                                                                                                                                                                                                                                                                                                                                                                                                                                                                                                                                                                                                                                                                                                                                                                                                                                                                                                                                                                                                                                                                                                                                                                                                                                                                                                                                                                                                                                                                                                                                                                                                                                                                                                                                                                                                                                                                                                                                                                                                                                                                                                                                                                                                                                                                                                                                                                                                                                                                                                                                                                                                                                                                                                                                                                                                                                                                                                                                                                                                                                   | Not analysed |                                       |                                       |                                   |  |  |                         |          |     |                    |           |     |                      |           |     |                         |           |     |                           |           |    |                         |           |     |                             |           |     |                            |           |     |                                         |  |  |                        |           |      |                           |           |      |                         |          |      |                     |           |      |                       |           |      |                         |           |      |                         |           |    |                   |           |    |                              |           |    |                     |           |    |                                 |           |    |                                 |           |    |                           |           |    |                         |  |  |                      |            |              |                       |          |              |                    |           |    |
| Nitric oxide (ppm)              | 5.5 (1.5)                                                                                                                                                                                                                                                                                                                                                                                                                                                                                                                                                                                                                                                                                                                                                                                                                                                                                                                                                                                                                                                                                                                                                                                                                                                                                                                                                                                                                                                                                                                                                                                                                                                                                                                                                                                                                                                                                                                                                                                                                                                                                                                                                                                                                                                                                                                                                                                                                                                                                                                                                                                                                                                                                                                                                                                                                                                                                                                                                                                                                                                                                                                                                                                                                                                                                                                                                                                                                                                                                                                                                                                                                                                                                                                                                                                                  | 6%           |                                       |                                       |                                   |  |  |                         |          |     |                    |           |     |                      |           |     |                         |           |     |                           |           |    |                         |           |     |                             |           |     |                            |           |     |                                         |  |  |                        |           |      |                           |           |      |                         |          |      |                     |           |      |                       |           |      |                         |           |      |                         |           |    |                   |           |    |                              |           |    |                     |           |    |                                 |           |    |                                 |           |    |                           |           |    |                         |  |  |                      |            |              |                       |          |              |                    |           |    |

|                               |                                                                                                                                                                                                                                                                                                                                                                                                                                                                                                                                                                                                                                                                                                                                                                                                                                                                                                              |               |     |
|-------------------------------|--------------------------------------------------------------------------------------------------------------------------------------------------------------------------------------------------------------------------------------------------------------------------------------------------------------------------------------------------------------------------------------------------------------------------------------------------------------------------------------------------------------------------------------------------------------------------------------------------------------------------------------------------------------------------------------------------------------------------------------------------------------------------------------------------------------------------------------------------------------------------------------------------------------|---------------|-----|
|                               | Nicotine (mg/stick)                                                                                                                                                                                                                                                                                                                                                                                                                                                                                                                                                                                                                                                                                                                                                                                                                                                                                          | 0.301 (0.213) | 84% |
| <b>Conclusions</b>            | <ul style="list-style-type: none"> <li>• 'The emissions released by IQOS contain elements from pyrolysis and thermogenic degradation that are the same harmful constituents of conventional tobacco cigarette smoke' [13].</li> </ul>                                                                                                                                                                                                                                                                                                                                                                                                                                                                                                                                                                                                                                                                        |               |     |
| <b>Authors, study year</b>    | Farsalinos et al., 2017 [15]                                                                                                                                                                                                                                                                                                                                                                                                                                                                                                                                                                                                                                                                                                                                                                                                                                                                                 |               |     |
| <b>Funder/Affiliations</b>    | <p><b>Affiliations:</b></p> <ul style="list-style-type: none"> <li>• Department of Cardiology, Onassis Cardiac Surgery Center, Kallithea, Greece</li> <li>• Department of Pharmacy, University of Patras, Rio-Patras, Greece</li> <li>• Skylab-Med Laboratories of Applied Industrial Research and Analysis S.A., Marousi, Greece</li> <li>• Declaration of interests: Two studies by Farsalinos were funded by the non-profit association American E-liquid Manufacturing Standards Association in 2013 and one study was funded by the non-profit Tennessee Smoke-Free Association in 2015.</li> </ul>                                                                                                                                                                                                                                                                                                     |               |     |
| <b>Primary aim</b>            | To compare levels of nicotine in mainstream IQOS emissions from regular and menthol tobacco sticks with nicotine in different type of e-cigarettes aerosol and in mainstream cigarette smoke                                                                                                                                                                                                                                                                                                                                                                                                                                                                                                                                                                                                                                                                                                                 |               |     |
| <b>Products used</b>          | <ul style="list-style-type: none"> <li>• IQOS (purchased in Milan, Italy) and tobacco sticks (regular and menthol, purchased in Milan)</li> <li>• Marlboro Regular cigarette (purchased in Athens, Greece)</li> <li>• First generation cigalike e-cigarette (Vapour 2 cigs, Prague, Czech Republic)</li> <li>• Second generation pen-style e-cigarette (Epsilon, Nobacco, Athens, Greece): an eGo battery (1100 mAh) and a tank-type bottom coil atomizer</li> <li>• Third generation tank style e-cigarette: battery device (EVIC VTC Mini, Joyetech, Shenzhen, China), tank-type atomizer (Nautilus Mini, Aspire, Shenzhen, China)</li> <li>• For all e-cigarettes the same custom made liquid was used: 45% propylene glycol, 45% glycerol, 8% water and 2% nicotine</li> </ul>                                                                                                                           |               |     |
| <b>Methods</b>                | <p><b>Design:</b> Laboratory comparison study using smoking machines</p> <p><b>Study time and setting:</b> 2015, Athens, Greece</p> <p><b>Method description:</b> For tested products mainstream smoke and aerosol was produced using Health Canada Intense (HCI) machine-smoking regime (55 ml puff volume, 27.5 ml/s puff flow rate, 2 s puff duration, 30 s inter-puff interval). For e-cigarettes and HnB, an additional puffing regime (55 ml puff volume, 13.75 ml/s puff flow rate, 4 s puff, and 30 s inter-puff interval) was used for comparison.</p>                                                                                                                                                                                                                                                                                                                                              |               |     |
| <b>Participants</b>           | Not reported                                                                                                                                                                                                                                                                                                                                                                                                                                                                                                                                                                                                                                                                                                                                                                                                                                                                                                 |               |     |
| <b>Interventions/Exposure</b> | <p>'The method for quantification of nicotine was based on the WHO official method SOP 04.</p> <p>Unused tobacco sticks from HnB were examined for the levels of nicotine per weight of tobacco. After careful removal of paper and filter from the tobacco stick, the tobacco was weighted. Subsequently, 200 mg of tobacco was mixed with 1 mL of 2% quinoline solution in n-hexane (used as internal standard), 4 mL distilled water, and 2 mL NaOH. The solution was allowed to rest for 15 minutes. Then, it was introduced to a round bottom flask and 200 mL n-hexane was added. The solution was stirred strongly using a magnetic stirrer for 1 hour and then it was transferred in a separator funnel for the separation of two layers. From the supernatant layer, 200 µL was further diluted with n-hexane to a final volume of 10 mL. The lower, aqueous layer was re-extracted with 200 mL</p> |               |     |



|                             | n-hexane. From the supernatant layer of this second extraction, 200 µL were further diluted with n-hexane to a final volume of 10 mL. Finally, both extracts were analyzed with GC-NPD for the nicotine content, and the nicotine concentration was calculated as mg/g tobacco' [15]                                                                                                                                                                                                                                                                                                                                                                                                                                                                                                                                                                                                                                                                                             |                      |                            |                                                    |                                                    |                      |                      |                     |  |                         |  |              |            |                     |                     |              |            |                     |                     |                      |  |                     |                     |                       |  |                     |                     |                        |  |                     |                     |
|-----------------------------|----------------------------------------------------------------------------------------------------------------------------------------------------------------------------------------------------------------------------------------------------------------------------------------------------------------------------------------------------------------------------------------------------------------------------------------------------------------------------------------------------------------------------------------------------------------------------------------------------------------------------------------------------------------------------------------------------------------------------------------------------------------------------------------------------------------------------------------------------------------------------------------------------------------------------------------------------------------------------------|----------------------|----------------------------|----------------------------------------------------|----------------------------------------------------|----------------------|----------------------|---------------------|--|-------------------------|--|--------------|------------|---------------------|---------------------|--------------|------------|---------------------|---------------------|----------------------|--|---------------------|---------------------|-----------------------|--|---------------------|---------------------|------------------------|--|---------------------|---------------------|
| <b>Outcome/Key findings</b> | Levels of nicotine in mainstream aerosol of IQOS and tested e-cigarettes compared with reference cigarette smoke                                                                                                                                                                                                                                                                                                                                                                                                                                                                                                                                                                                                                                                                                                                                                                                                                                                                 |                      |                            |                                                    |                                                    |                      |                      |                     |  |                         |  |              |            |                     |                     |              |            |                     |                     |                      |  |                     |                     |                       |  |                     |                     |                        |  |                     |                     |
|                             | <table border="1"> <thead> <tr> <th rowspan="2">Tested product</th> <th rowspan="2">Nicotine in tobacco (mg/g)</th> <th colspan="2">Nicotine in aerosol, mg (% ratio vs ref cigarette)</th> </tr> <tr> <th>2 seconds HCl regime</th> <th>4 seconds HCl regime</th> </tr> </thead> <tbody> <tr> <td>Reference cigarette</td> <td></td> <td>1.99 ± 0.20 (reference)</td> <td></td> </tr> <tr> <td>Regular IQOS</td> <td>15.2 ± 1.1</td> <td>1.40 ± 0.16 (70.4%)</td> <td>1.41 ± 0.08 (70.9%)</td> </tr> <tr> <td>Menthol IQOS</td> <td>15.6 ± 1.7</td> <td>1.38 ± 0.11 (69.3%)</td> <td>1.43 ± 0.13 (71.9%)</td> </tr> <tr> <td>Cigalike e-cigarette</td> <td></td> <td>0.46 ± 0.06 (23.1%)</td> <td>0.86 ± 0.08 (43.2%)</td> </tr> <tr> <td>Pen-style e-cigarette</td> <td></td> <td>0.51 ± 0.05 (25.6%)</td> <td>1.73 ± 0.09 (86.9%)</td> </tr> <tr> <td>Tank style e-cigarette</td> <td></td> <td>0.82 ± 0.06 (41.2%)</td> <td>1.84 ± 0.11 (92.5%)</td> </tr> </tbody> </table> | Tested product       | Nicotine in tobacco (mg/g) | Nicotine in aerosol, mg (% ratio vs ref cigarette) |                                                    | 2 seconds HCl regime | 4 seconds HCl regime | Reference cigarette |  | 1.99 ± 0.20 (reference) |  | Regular IQOS | 15.2 ± 1.1 | 1.40 ± 0.16 (70.4%) | 1.41 ± 0.08 (70.9%) | Menthol IQOS | 15.6 ± 1.7 | 1.38 ± 0.11 (69.3%) | 1.43 ± 0.13 (71.9%) | Cigalike e-cigarette |  | 0.46 ± 0.06 (23.1%) | 0.86 ± 0.08 (43.2%) | Pen-style e-cigarette |  | 0.51 ± 0.05 (25.6%) | 1.73 ± 0.09 (86.9%) | Tank style e-cigarette |  | 0.82 ± 0.06 (41.2%) | 1.84 ± 0.11 (92.5%) |
|                             | Tested product                                                                                                                                                                                                                                                                                                                                                                                                                                                                                                                                                                                                                                                                                                                                                                                                                                                                                                                                                                   |                      |                            | Nicotine in tobacco (mg/g)                         | Nicotine in aerosol, mg (% ratio vs ref cigarette) |                      |                      |                     |  |                         |  |              |            |                     |                     |              |            |                     |                     |                      |  |                     |                     |                       |  |                     |                     |                        |  |                     |                     |
|                             |                                                                                                                                                                                                                                                                                                                                                                                                                                                                                                                                                                                                                                                                                                                                                                                                                                                                                                                                                                                  | 2 seconds HCl regime | 4 seconds HCl regime       |                                                    |                                                    |                      |                      |                     |  |                         |  |              |            |                     |                     |              |            |                     |                     |                      |  |                     |                     |                       |  |                     |                     |                        |  |                     |                     |
|                             | Reference cigarette                                                                                                                                                                                                                                                                                                                                                                                                                                                                                                                                                                                                                                                                                                                                                                                                                                                                                                                                                              |                      | 1.99 ± 0.20 (reference)    |                                                    |                                                    |                      |                      |                     |  |                         |  |              |            |                     |                     |              |            |                     |                     |                      |  |                     |                     |                       |  |                     |                     |                        |  |                     |                     |
|                             | Regular IQOS                                                                                                                                                                                                                                                                                                                                                                                                                                                                                                                                                                                                                                                                                                                                                                                                                                                                                                                                                                     | 15.2 ± 1.1           | 1.40 ± 0.16 (70.4%)        | 1.41 ± 0.08 (70.9%)                                |                                                    |                      |                      |                     |  |                         |  |              |            |                     |                     |              |            |                     |                     |                      |  |                     |                     |                       |  |                     |                     |                        |  |                     |                     |
|                             | Menthol IQOS                                                                                                                                                                                                                                                                                                                                                                                                                                                                                                                                                                                                                                                                                                                                                                                                                                                                                                                                                                     | 15.6 ± 1.7           | 1.38 ± 0.11 (69.3%)        | 1.43 ± 0.13 (71.9%)                                |                                                    |                      |                      |                     |  |                         |  |              |            |                     |                     |              |            |                     |                     |                      |  |                     |                     |                       |  |                     |                     |                        |  |                     |                     |
|                             | Cigalike e-cigarette                                                                                                                                                                                                                                                                                                                                                                                                                                                                                                                                                                                                                                                                                                                                                                                                                                                                                                                                                             |                      | 0.46 ± 0.06 (23.1%)        | 0.86 ± 0.08 (43.2%)                                |                                                    |                      |                      |                     |  |                         |  |              |            |                     |                     |              |            |                     |                     |                      |  |                     |                     |                       |  |                     |                     |                        |  |                     |                     |
| Pen-style e-cigarette       |                                                                                                                                                                                                                                                                                                                                                                                                                                                                                                                                                                                                                                                                                                                                                                                                                                                                                                                                                                                  | 0.51 ± 0.05 (25.6%)  | 1.73 ± 0.09 (86.9%)        |                                                    |                                                    |                      |                      |                     |  |                         |  |              |            |                     |                     |              |            |                     |                     |                      |  |                     |                     |                       |  |                     |                     |                        |  |                     |                     |
| Tank style e-cigarette      |                                                                                                                                                                                                                                                                                                                                                                                                                                                                                                                                                                                                                                                                                                                                                                                                                                                                                                                                                                                  | 0.82 ± 0.06 (41.2%)  | 1.84 ± 0.11 (92.5%)        |                                                    |                                                    |                      |                      |                     |  |                         |  |              |            |                     |                     |              |            |                     |                     |                      |  |                     |                     |                       |  |                     |                     |                        |  |                     |                     |
| <b>Conclusions</b>          | <ul style="list-style-type: none"> <li>IQOS delivered less nicotine to mainstream aerosol than tobacco cigarette did. Under 2 seconds HCl regime, IQOS nicotine delivery was higher compared with all tested e-cigarettes, but lower than pen-style and tank style e-cigarettes' at 4 seconds HCl regime</li> </ul>                                                                                                                                                                                                                                                                                                                                                                                                                                                                                                                                                                                                                                                              |                      |                            |                                                    |                                                    |                      |                      |                     |  |                         |  |              |            |                     |                     |              |            |                     |                     |                      |  |                     |                     |                       |  |                     |                     |                        |  |                     |                     |
| <b>Authors, study year</b>  | <b>Bekki et al., 2017</b> [16]                                                                                                                                                                                                                                                                                                                                                                                                                                                                                                                                                                                                                                                                                                                                                                                                                                                                                                                                                   |                      |                            |                                                    |                                                    |                      |                      |                     |  |                         |  |              |            |                     |                     |              |            |                     |                     |                      |  |                     |                     |                       |  |                     |                     |                        |  |                     |                     |
| <b>Funder/Affiliations</b>  | <p><b>Funded by:</b></p> <ul style="list-style-type: none"> <li>The Health and Labour Science Research Grants from Ministry of Health</li> <li>Labour and Welfare of the Japanese Government</li> <li>The practical research project for life-style related diseases including cardiovascular diseases and diabetes mellitus from Japan Agency for Medical Research and Development, AMED.</li> </ul> <p><b>Affiliations:</b></p> <ul style="list-style-type: none"> <li>Department of Environmental Health, National Institute of Public Health. Minami, Wako-shi, Saitama 351-0197, Japan</li> </ul>                                                                                                                                                                                                                                                                                                                                                                           |                      |                            |                                                    |                                                    |                      |                      |                     |  |                         |  |              |            |                     |                     |              |            |                     |                     |                      |  |                     |                     |                       |  |                     |                     |                        |  |                     |                     |
| <b>Primary aim</b>          | To compare levels of nicotine and HPHC in mainstream IQOS emissions from regular and menthol tobacco sticks with those in mainstream cigarette smoke                                                                                                                                                                                                                                                                                                                                                                                                                                                                                                                                                                                                                                                                                                                                                                                                                             |                      |                            |                                                    |                                                    |                      |                      |                     |  |                         |  |              |            |                     |                     |              |            |                     |                     |                      |  |                     |                     |                       |  |                     |                     |                        |  |                     |                     |
| <b>Products used</b>        | <ul style="list-style-type: none"> <li>Reference cigarettes 3R4F (high yield) and 1R5F (low yield)</li> <li>IQOS with regular and menthol tobacco sticks</li> </ul>                                                                                                                                                                                                                                                                                                                                                                                                                                                                                                                                                                                                                                                                                                                                                                                                              |                      |                            |                                                    |                                                    |                      |                      |                     |  |                         |  |              |            |                     |                     |              |            |                     |                     |                      |  |                     |                     |                       |  |                     |                     |                        |  |                     |                     |
| <b>Methods</b>              | <p><b>Design:</b> Laboratory comparison study using smoking machines</p> <p><b>Study time and setting:</b> Japan, time not reported</p>                                                                                                                                                                                                                                                                                                                                                                                                                                                                                                                                                                                                                                                                                                                                                                                                                                          |                      |                            |                                                    |                                                    |                      |                      |                     |  |                         |  |              |            |                     |                     |              |            |                     |                     |                      |  |                     |                     |                       |  |                     |                     |                        |  |                     |                     |

|                                      | <b>Method description:</b> For tested products mainstream smoke and aerosol was produced using Health Canada Intense (HCI) machine smoking regime (55 ml puff volume, 2 s puff duration, 30 s puff interval, and 100% blocking of the filter ventilation holes).                                                                                                                                                                                                                                                                                                                                                                                                                                                                                                                                                                                                                                                                                                                                                                                                                                                                                                                                                                                                                                                                                                                                                                                                                                                                                                                                                                                                                                                                                                                                                                                                                                                                                                                                                                                                                                                                                                                                                                          |              |                |                |                |                |      |           |           |           |           |                                     |             |            |            |            |                  |             |            |            |           |                |           |            |            |            |                     |           |           |           |           |                            |             |             |            |            |                                      |  |  |  |  |                |           |           |            |            |                |            |            |              |             |                |            |            |              |             |                |            |            |              |             |                  |            |             |              |              |
|--------------------------------------|-------------------------------------------------------------------------------------------------------------------------------------------------------------------------------------------------------------------------------------------------------------------------------------------------------------------------------------------------------------------------------------------------------------------------------------------------------------------------------------------------------------------------------------------------------------------------------------------------------------------------------------------------------------------------------------------------------------------------------------------------------------------------------------------------------------------------------------------------------------------------------------------------------------------------------------------------------------------------------------------------------------------------------------------------------------------------------------------------------------------------------------------------------------------------------------------------------------------------------------------------------------------------------------------------------------------------------------------------------------------------------------------------------------------------------------------------------------------------------------------------------------------------------------------------------------------------------------------------------------------------------------------------------------------------------------------------------------------------------------------------------------------------------------------------------------------------------------------------------------------------------------------------------------------------------------------------------------------------------------------------------------------------------------------------------------------------------------------------------------------------------------------------------------------------------------------------------------------------------------------|--------------|----------------|----------------|----------------|----------------|------|-----------|-----------|-----------|-----------|-------------------------------------|-------------|------------|------------|------------|------------------|-------------|------------|------------|-----------|----------------|-----------|------------|------------|------------|---------------------|-----------|-----------|-----------|-----------|----------------------------|-------------|-------------|------------|------------|--------------------------------------|--|--|--|--|----------------|-----------|-----------|------------|------------|----------------|------------|------------|--------------|-------------|----------------|------------|------------|--------------|-------------|----------------|------------|------------|--------------|-------------|------------------|------------|-------------|--------------|--------------|
| <b>Participants</b>                  | Not reported                                                                                                                                                                                                                                                                                                                                                                                                                                                                                                                                                                                                                                                                                                                                                                                                                                                                                                                                                                                                                                                                                                                                                                                                                                                                                                                                                                                                                                                                                                                                                                                                                                                                                                                                                                                                                                                                                                                                                                                                                                                                                                                                                                                                                              |              |                |                |                |                |      |           |           |           |           |                                     |             |            |            |            |                  |             |            |            |           |                |           |            |            |            |                     |           |           |           |           |                            |             |             |            |            |                                      |  |  |  |  |                |           |           |            |            |                |            |            |              |             |                |            |            |              |             |                |            |            |              |             |                  |            |             |              |              |
| <b>Interventions/Exposure</b>        | Each sampling was performed by 3 cigarettes and tobacco sticks. A cigarette was puffed 9 times, and one tobacco stick was puffed 11 times.                                                                                                                                                                                                                                                                                                                                                                                                                                                                                                                                                                                                                                                                                                                                                                                                                                                                                                                                                                                                                                                                                                                                                                                                                                                                                                                                                                                                                                                                                                                                                                                                                                                                                                                                                                                                                                                                                                                                                                                                                                                                                                |              |                |                |                |                |      |           |           |           |           |                                     |             |            |            |            |                  |             |            |            |           |                |           |            |            |            |                     |           |           |           |           |                            |             |             |            |            |                                      |  |  |  |  |                |           |           |            |            |                |            |            |              |             |                |            |            |              |             |                |            |            |              |             |                  |            |             |              |              |
| <b>Outcome/Key findings</b>          | <ul style="list-style-type: none"> <li>IQOS regular tobacco sticks had 15.7 mg of nicotine and menthol tobacco sticks had 17.1 mg of nicotine per gram of tobacco. These estimates were similar to nicotine in reference cigarettes: 19.7 mg/g in 3R4F and 15.9 mg/g in 1R5F.</li> <li>IQOS showed more effective transfer rate of nicotine from tobacco sticks to mainstream aerosol than reference cigarettes: 23.4% (regular) and 23.5% (menthol) compared with 11.3% (3R4F) and 11.5% (1R5F).</li> </ul> <p>HPHC in mainstream IQOS aerosol of regular and menthol tobacco sticks and in smoke of reference cigarettes</p> <table border="1"> <thead> <tr> <th></th> <th>IQOS regular</th> <th>IQOS menthol</th> <th>3R4F cigarette</th> <th>1R5F cigarette</th> </tr> <tr> <th>HPHC</th> <th>Mean ± SD</th> <th>Mean ± SD</th> <th>Mean ± SD</th> <th>Mean ± SD</th> </tr> </thead> <tbody> <tr> <td>Total particulate matter (mg/stick)</td> <td>44.0 ± 11.4</td> <td>49.9 ± 8.6</td> <td>36.9 ± 1.9</td> <td>28.9 ± 2.3</td> </tr> <tr> <td>Water (mg/stick)</td> <td>33.1 ± 10.2</td> <td>35.3 ± 8.3</td> <td>10.1 ± 0.9</td> <td>8.8 ± 1.1</td> </tr> <tr> <td>Tar (mg/stick)</td> <td>9.8 ± 3.0</td> <td>13.4 ± 2.2</td> <td>25.2 ± 1.5</td> <td>19.2 ± 1.3</td> </tr> <tr> <td>Nicotine (mg/stick)</td> <td>1.1 ± 0.1</td> <td>1.2 ± 0.1</td> <td>1.7 ± 0.1</td> <td>1.0 ± 0.1</td> </tr> <tr> <td>Carbon monoxide (mg/stick)</td> <td>0.44 ± 0.04</td> <td>0.43 ± 0.04</td> <td>33.0 ± 1.8</td> <td>29.7 ± 1.7</td> </tr> <tr> <td colspan="5"><b>Tobacco-specific nitrosamines</b></td> </tr> <tr> <td>NAB (ng/stick)</td> <td>4.5 ± 0.5</td> <td>5.5 ± 0.6</td> <td>30.4 ± 2.0</td> <td>26.2 ± 0.5</td> </tr> <tr> <td>NAT (ng/stick)</td> <td>34.0 ± 3.1</td> <td>37.2 ± 3.9</td> <td>246.4 ± 16.9</td> <td>183.1 ± 6.0</td> </tr> <tr> <td>NNN (ng/stick)</td> <td>19.2 ± 2.1</td> <td>24.9 ± 3.5</td> <td>311.1 ± 24.3</td> <td>240.7 ± 6.6</td> </tr> <tr> <td>NNK (ng/stick)</td> <td>12.3 ± 1.5</td> <td>13.8 ± 2.6</td> <td>250.4 ± 13.7</td> <td>107.0 ± 5.0</td> </tr> <tr> <td>Total (ng/stick)</td> <td>70.0 ± 7.2</td> <td>81.4 ± 10.4</td> <td>838.2 ± 53.7</td> <td>557.1 ± 15.7</td> </tr> </tbody> </table> |              | IQOS regular   | IQOS menthol   | 3R4F cigarette | 1R5F cigarette | HPHC | Mean ± SD | Mean ± SD | Mean ± SD | Mean ± SD | Total particulate matter (mg/stick) | 44.0 ± 11.4 | 49.9 ± 8.6 | 36.9 ± 1.9 | 28.9 ± 2.3 | Water (mg/stick) | 33.1 ± 10.2 | 35.3 ± 8.3 | 10.1 ± 0.9 | 8.8 ± 1.1 | Tar (mg/stick) | 9.8 ± 3.0 | 13.4 ± 2.2 | 25.2 ± 1.5 | 19.2 ± 1.3 | Nicotine (mg/stick) | 1.1 ± 0.1 | 1.2 ± 0.1 | 1.7 ± 0.1 | 1.0 ± 0.1 | Carbon monoxide (mg/stick) | 0.44 ± 0.04 | 0.43 ± 0.04 | 33.0 ± 1.8 | 29.7 ± 1.7 | <b>Tobacco-specific nitrosamines</b> |  |  |  |  | NAB (ng/stick) | 4.5 ± 0.5 | 5.5 ± 0.6 | 30.4 ± 2.0 | 26.2 ± 0.5 | NAT (ng/stick) | 34.0 ± 3.1 | 37.2 ± 3.9 | 246.4 ± 16.9 | 183.1 ± 6.0 | NNN (ng/stick) | 19.2 ± 2.1 | 24.9 ± 3.5 | 311.1 ± 24.3 | 240.7 ± 6.6 | NNK (ng/stick) | 12.3 ± 1.5 | 13.8 ± 2.6 | 250.4 ± 13.7 | 107.0 ± 5.0 | Total (ng/stick) | 70.0 ± 7.2 | 81.4 ± 10.4 | 838.2 ± 53.7 | 557.1 ± 15.7 |
|                                      | IQOS regular                                                                                                                                                                                                                                                                                                                                                                                                                                                                                                                                                                                                                                                                                                                                                                                                                                                                                                                                                                                                                                                                                                                                                                                                                                                                                                                                                                                                                                                                                                                                                                                                                                                                                                                                                                                                                                                                                                                                                                                                                                                                                                                                                                                                                              | IQOS menthol | 3R4F cigarette | 1R5F cigarette |                |                |      |           |           |           |           |                                     |             |            |            |            |                  |             |            |            |           |                |           |            |            |            |                     |           |           |           |           |                            |             |             |            |            |                                      |  |  |  |  |                |           |           |            |            |                |            |            |              |             |                |            |            |              |             |                |            |            |              |             |                  |            |             |              |              |
| HPHC                                 | Mean ± SD                                                                                                                                                                                                                                                                                                                                                                                                                                                                                                                                                                                                                                                                                                                                                                                                                                                                                                                                                                                                                                                                                                                                                                                                                                                                                                                                                                                                                                                                                                                                                                                                                                                                                                                                                                                                                                                                                                                                                                                                                                                                                                                                                                                                                                 | Mean ± SD    | Mean ± SD      | Mean ± SD      |                |                |      |           |           |           |           |                                     |             |            |            |            |                  |             |            |            |           |                |           |            |            |            |                     |           |           |           |           |                            |             |             |            |            |                                      |  |  |  |  |                |           |           |            |            |                |            |            |              |             |                |            |            |              |             |                |            |            |              |             |                  |            |             |              |              |
| Total particulate matter (mg/stick)  | 44.0 ± 11.4                                                                                                                                                                                                                                                                                                                                                                                                                                                                                                                                                                                                                                                                                                                                                                                                                                                                                                                                                                                                                                                                                                                                                                                                                                                                                                                                                                                                                                                                                                                                                                                                                                                                                                                                                                                                                                                                                                                                                                                                                                                                                                                                                                                                                               | 49.9 ± 8.6   | 36.9 ± 1.9     | 28.9 ± 2.3     |                |                |      |           |           |           |           |                                     |             |            |            |            |                  |             |            |            |           |                |           |            |            |            |                     |           |           |           |           |                            |             |             |            |            |                                      |  |  |  |  |                |           |           |            |            |                |            |            |              |             |                |            |            |              |             |                |            |            |              |             |                  |            |             |              |              |
| Water (mg/stick)                     | 33.1 ± 10.2                                                                                                                                                                                                                                                                                                                                                                                                                                                                                                                                                                                                                                                                                                                                                                                                                                                                                                                                                                                                                                                                                                                                                                                                                                                                                                                                                                                                                                                                                                                                                                                                                                                                                                                                                                                                                                                                                                                                                                                                                                                                                                                                                                                                                               | 35.3 ± 8.3   | 10.1 ± 0.9     | 8.8 ± 1.1      |                |                |      |           |           |           |           |                                     |             |            |            |            |                  |             |            |            |           |                |           |            |            |            |                     |           |           |           |           |                            |             |             |            |            |                                      |  |  |  |  |                |           |           |            |            |                |            |            |              |             |                |            |            |              |             |                |            |            |              |             |                  |            |             |              |              |
| Tar (mg/stick)                       | 9.8 ± 3.0                                                                                                                                                                                                                                                                                                                                                                                                                                                                                                                                                                                                                                                                                                                                                                                                                                                                                                                                                                                                                                                                                                                                                                                                                                                                                                                                                                                                                                                                                                                                                                                                                                                                                                                                                                                                                                                                                                                                                                                                                                                                                                                                                                                                                                 | 13.4 ± 2.2   | 25.2 ± 1.5     | 19.2 ± 1.3     |                |                |      |           |           |           |           |                                     |             |            |            |            |                  |             |            |            |           |                |           |            |            |            |                     |           |           |           |           |                            |             |             |            |            |                                      |  |  |  |  |                |           |           |            |            |                |            |            |              |             |                |            |            |              |             |                |            |            |              |             |                  |            |             |              |              |
| Nicotine (mg/stick)                  | 1.1 ± 0.1                                                                                                                                                                                                                                                                                                                                                                                                                                                                                                                                                                                                                                                                                                                                                                                                                                                                                                                                                                                                                                                                                                                                                                                                                                                                                                                                                                                                                                                                                                                                                                                                                                                                                                                                                                                                                                                                                                                                                                                                                                                                                                                                                                                                                                 | 1.2 ± 0.1    | 1.7 ± 0.1      | 1.0 ± 0.1      |                |                |      |           |           |           |           |                                     |             |            |            |            |                  |             |            |            |           |                |           |            |            |            |                     |           |           |           |           |                            |             |             |            |            |                                      |  |  |  |  |                |           |           |            |            |                |            |            |              |             |                |            |            |              |             |                |            |            |              |             |                  |            |             |              |              |
| Carbon monoxide (mg/stick)           | 0.44 ± 0.04                                                                                                                                                                                                                                                                                                                                                                                                                                                                                                                                                                                                                                                                                                                                                                                                                                                                                                                                                                                                                                                                                                                                                                                                                                                                                                                                                                                                                                                                                                                                                                                                                                                                                                                                                                                                                                                                                                                                                                                                                                                                                                                                                                                                                               | 0.43 ± 0.04  | 33.0 ± 1.8     | 29.7 ± 1.7     |                |                |      |           |           |           |           |                                     |             |            |            |            |                  |             |            |            |           |                |           |            |            |            |                     |           |           |           |           |                            |             |             |            |            |                                      |  |  |  |  |                |           |           |            |            |                |            |            |              |             |                |            |            |              |             |                |            |            |              |             |                  |            |             |              |              |
| <b>Tobacco-specific nitrosamines</b> |                                                                                                                                                                                                                                                                                                                                                                                                                                                                                                                                                                                                                                                                                                                                                                                                                                                                                                                                                                                                                                                                                                                                                                                                                                                                                                                                                                                                                                                                                                                                                                                                                                                                                                                                                                                                                                                                                                                                                                                                                                                                                                                                                                                                                                           |              |                |                |                |                |      |           |           |           |           |                                     |             |            |            |            |                  |             |            |            |           |                |           |            |            |            |                     |           |           |           |           |                            |             |             |            |            |                                      |  |  |  |  |                |           |           |            |            |                |            |            |              |             |                |            |            |              |             |                |            |            |              |             |                  |            |             |              |              |
| NAB (ng/stick)                       | 4.5 ± 0.5                                                                                                                                                                                                                                                                                                                                                                                                                                                                                                                                                                                                                                                                                                                                                                                                                                                                                                                                                                                                                                                                                                                                                                                                                                                                                                                                                                                                                                                                                                                                                                                                                                                                                                                                                                                                                                                                                                                                                                                                                                                                                                                                                                                                                                 | 5.5 ± 0.6    | 30.4 ± 2.0     | 26.2 ± 0.5     |                |                |      |           |           |           |           |                                     |             |            |            |            |                  |             |            |            |           |                |           |            |            |            |                     |           |           |           |           |                            |             |             |            |            |                                      |  |  |  |  |                |           |           |            |            |                |            |            |              |             |                |            |            |              |             |                |            |            |              |             |                  |            |             |              |              |
| NAT (ng/stick)                       | 34.0 ± 3.1                                                                                                                                                                                                                                                                                                                                                                                                                                                                                                                                                                                                                                                                                                                                                                                                                                                                                                                                                                                                                                                                                                                                                                                                                                                                                                                                                                                                                                                                                                                                                                                                                                                                                                                                                                                                                                                                                                                                                                                                                                                                                                                                                                                                                                | 37.2 ± 3.9   | 246.4 ± 16.9   | 183.1 ± 6.0    |                |                |      |           |           |           |           |                                     |             |            |            |            |                  |             |            |            |           |                |           |            |            |            |                     |           |           |           |           |                            |             |             |            |            |                                      |  |  |  |  |                |           |           |            |            |                |            |            |              |             |                |            |            |              |             |                |            |            |              |             |                  |            |             |              |              |
| NNN (ng/stick)                       | 19.2 ± 2.1                                                                                                                                                                                                                                                                                                                                                                                                                                                                                                                                                                                                                                                                                                                                                                                                                                                                                                                                                                                                                                                                                                                                                                                                                                                                                                                                                                                                                                                                                                                                                                                                                                                                                                                                                                                                                                                                                                                                                                                                                                                                                                                                                                                                                                | 24.9 ± 3.5   | 311.1 ± 24.3   | 240.7 ± 6.6    |                |                |      |           |           |           |           |                                     |             |            |            |            |                  |             |            |            |           |                |           |            |            |            |                     |           |           |           |           |                            |             |             |            |            |                                      |  |  |  |  |                |           |           |            |            |                |            |            |              |             |                |            |            |              |             |                |            |            |              |             |                  |            |             |              |              |
| NNK (ng/stick)                       | 12.3 ± 1.5                                                                                                                                                                                                                                                                                                                                                                                                                                                                                                                                                                                                                                                                                                                                                                                                                                                                                                                                                                                                                                                                                                                                                                                                                                                                                                                                                                                                                                                                                                                                                                                                                                                                                                                                                                                                                                                                                                                                                                                                                                                                                                                                                                                                                                | 13.8 ± 2.6   | 250.4 ± 13.7   | 107.0 ± 5.0    |                |                |      |           |           |           |           |                                     |             |            |            |            |                  |             |            |            |           |                |           |            |            |            |                     |           |           |           |           |                            |             |             |            |            |                                      |  |  |  |  |                |           |           |            |            |                |            |            |              |             |                |            |            |              |             |                |            |            |              |             |                  |            |             |              |              |
| Total (ng/stick)                     | 70.0 ± 7.2                                                                                                                                                                                                                                                                                                                                                                                                                                                                                                                                                                                                                                                                                                                                                                                                                                                                                                                                                                                                                                                                                                                                                                                                                                                                                                                                                                                                                                                                                                                                                                                                                                                                                                                                                                                                                                                                                                                                                                                                                                                                                                                                                                                                                                | 81.4 ± 10.4  | 838.2 ± 53.7   | 557.1 ± 15.7   |                |                |      |           |           |           |           |                                     |             |            |            |            |                  |             |            |            |           |                |           |            |            |            |                     |           |           |           |           |                            |             |             |            |            |                                      |  |  |  |  |                |           |           |            |            |                |            |            |              |             |                |            |            |              |             |                |            |            |              |             |                  |            |             |              |              |
| <b>Authors' conclusions</b>          | <ul style="list-style-type: none"> <li>Although at lower levels than in mainstream smoke of reference cigarettes, IQOS mainstream emissions include detectable levels of HPHC and particulate matter</li> </ul>                                                                                                                                                                                                                                                                                                                                                                                                                                                                                                                                                                                                                                                                                                                                                                                                                                                                                                                                                                                                                                                                                                                                                                                                                                                                                                                                                                                                                                                                                                                                                                                                                                                                                                                                                                                                                                                                                                                                                                                                                           |              |                |                |                |                |      |           |           |           |           |                                     |             |            |            |            |                  |             |            |            |           |                |           |            |            |            |                     |           |           |           |           |                            |             |             |            |            |                                      |  |  |  |  |                |           |           |            |            |                |            |            |              |             |                |            |            |              |             |                |            |            |              |             |                  |            |             |              |              |
| <b>Authors, study year</b>           | Schaller et al., 2016 [17]                                                                                                                                                                                                                                                                                                                                                                                                                                                                                                                                                                                                                                                                                                                                                                                                                                                                                                                                                                                                                                                                                                                                                                                                                                                                                                                                                                                                                                                                                                                                                                                                                                                                                                                                                                                                                                                                                                                                                                                                                                                                                                                                                                                                                |              |                |                |                |                |      |           |           |           |           |                                     |             |            |            |            |                  |             |            |            |           |                |           |            |            |            |                     |           |           |           |           |                            |             |             |            |            |                                      |  |  |  |  |                |           |           |            |            |                |            |            |              |             |                |            |            |              |             |                |            |            |              |             |                  |            |             |              |              |
| <b>Funder/Affiliations</b>           | <b>Affiliations:</b> Philip Morris International R&D, Philip Morris Products S.A., Quai Jeanrenaud 5, 2000 Neuchatel, Switzerland                                                                                                                                                                                                                                                                                                                                                                                                                                                                                                                                                                                                                                                                                                                                                                                                                                                                                                                                                                                                                                                                                                                                                                                                                                                                                                                                                                                                                                                                                                                                                                                                                                                                                                                                                                                                                                                                                                                                                                                                                                                                                                         |              |                |                |                |                |      |           |           |           |           |                                     |             |            |            |            |                  |             |            |            |           |                |           |            |            |            |                     |           |           |           |           |                            |             |             |            |            |                                      |  |  |  |  |                |           |           |            |            |                |            |            |              |             |                |            |            |              |             |                |            |            |              |             |                  |            |             |              |              |
| <b>Primary aim</b>                   | To compare levels of HPHC in mainstream IQOS emissions with those in mainstream cigarette smoke                                                                                                                                                                                                                                                                                                                                                                                                                                                                                                                                                                                                                                                                                                                                                                                                                                                                                                                                                                                                                                                                                                                                                                                                                                                                                                                                                                                                                                                                                                                                                                                                                                                                                                                                                                                                                                                                                                                                                                                                                                                                                                                                           |              |                |                |                |                |      |           |           |           |           |                                     |             |            |            |            |                  |             |            |            |           |                |           |            |            |            |                     |           |           |           |           |                            |             |             |            |            |                                      |  |  |  |  |                |           |           |            |            |                |            |            |              |             |                |            |            |              |             |                |            |            |              |             |                  |            |             |              |              |

| <b>Products used</b>          | <ul style="list-style-type: none"> <li>Reference cigarette 3R4F</li> <li>THS 2.2 (IQOS) used with two regular and two menthol tobacco sticks variants</li> </ul>                                                                                                                                                                                                                                                                                                                                                                                                                                                                                                                                                                                                                                                                                                                                                                                                                                                                                                                                                                                                                                                                                                                                                                                                                                                                                                                                                                                                                                                                                                                                                                                                                                                                                                                                                                                                                                                                                                                                                                                                                                                                                                                                                                                                                                                  |                  |                  |                          |                          |      |               |               |               |              |  |  |  |                    |            |            |            |                         |            |            |          |                            |            |            |          |                             |             |             |          |                  |  |  |  |                          |            |          |             |                         |          |          |            |                            |            |            |          |                         |             |             |             |                     |              |             |          |                           |             |             |             |                    |            |            |           |                                |             |             |          |                                                     |  |  |  |                     |             |             |            |                    |               |               |            |                   |             |             |          |                          |               |               |            |                          |               |               |            |                    |               |               |            |
|-------------------------------|-------------------------------------------------------------------------------------------------------------------------------------------------------------------------------------------------------------------------------------------------------------------------------------------------------------------------------------------------------------------------------------------------------------------------------------------------------------------------------------------------------------------------------------------------------------------------------------------------------------------------------------------------------------------------------------------------------------------------------------------------------------------------------------------------------------------------------------------------------------------------------------------------------------------------------------------------------------------------------------------------------------------------------------------------------------------------------------------------------------------------------------------------------------------------------------------------------------------------------------------------------------------------------------------------------------------------------------------------------------------------------------------------------------------------------------------------------------------------------------------------------------------------------------------------------------------------------------------------------------------------------------------------------------------------------------------------------------------------------------------------------------------------------------------------------------------------------------------------------------------------------------------------------------------------------------------------------------------------------------------------------------------------------------------------------------------------------------------------------------------------------------------------------------------------------------------------------------------------------------------------------------------------------------------------------------------------------------------------------------------------------------------------------------------|------------------|------------------|--------------------------|--------------------------|------|---------------|---------------|---------------|--------------|--|--|--|--------------------|------------|------------|------------|-------------------------|------------|------------|----------|----------------------------|------------|------------|----------|-----------------------------|-------------|-------------|----------|------------------|--|--|--|--------------------------|------------|----------|-------------|-------------------------|----------|----------|------------|----------------------------|------------|------------|----------|-------------------------|-------------|-------------|-------------|---------------------|--------------|-------------|----------|---------------------------|-------------|-------------|-------------|--------------------|------------|------------|-----------|--------------------------------|-------------|-------------|----------|-----------------------------------------------------|--|--|--|---------------------|-------------|-------------|------------|--------------------|---------------|---------------|------------|-------------------|-------------|-------------|----------|--------------------------|---------------|---------------|------------|--------------------------|---------------|---------------|------------|--------------------|---------------|---------------|------------|
| <b>Methods</b>                | <p><b>Design:</b> Laboratory comparison study using smoking machines</p> <p><b>Study time and setting:</b> Switzerland, time not reported</p> <p><b>Measures:</b> For tested products mainstream smoke and aerosol was produced using Health Canada Intense (HCI) machine smoking regime</p>                                                                                                                                                                                                                                                                                                                                                                                                                                                                                                                                                                                                                                                                                                                                                                                                                                                                                                                                                                                                                                                                                                                                                                                                                                                                                                                                                                                                                                                                                                                                                                                                                                                                                                                                                                                                                                                                                                                                                                                                                                                                                                                      |                  |                  |                          |                          |      |               |               |               |              |  |  |  |                    |            |            |            |                         |            |            |          |                            |            |            |          |                             |             |             |          |                  |  |  |  |                          |            |          |             |                         |          |          |            |                            |            |            |          |                         |             |             |             |                     |              |             |          |                           |             |             |             |                    |            |            |           |                                |             |             |          |                                                     |  |  |  |                     |             |             |            |                    |               |               |            |                   |             |             |          |                          |               |               |            |                          |               |               |            |                    |               |               |            |
| <b>Participants</b>           | Not reported                                                                                                                                                                                                                                                                                                                                                                                                                                                                                                                                                                                                                                                                                                                                                                                                                                                                                                                                                                                                                                                                                                                                                                                                                                                                                                                                                                                                                                                                                                                                                                                                                                                                                                                                                                                                                                                                                                                                                                                                                                                                                                                                                                                                                                                                                                                                                                                                      |                  |                  |                          |                          |      |               |               |               |              |  |  |  |                    |            |            |            |                         |            |            |          |                            |            |            |          |                             |             |             |          |                  |  |  |  |                          |            |          |             |                         |          |          |            |                            |            |            |          |                         |             |             |             |                     |              |             |          |                           |             |             |             |                    |            |            |           |                                |             |             |          |                                                     |  |  |  |                     |             |             |            |                    |               |               |            |                   |             |             |          |                          |               |               |            |                          |               |               |            |                    |               |               |            |
| <b>Interventions/Exposure</b> | 'The reference cigarette 3R4F was smoked to a butt length of 35 mm using a bell-shaped puff profile and 100% blocking of ventilation holes. THS2.2 Regular and Menthol tobacco sticks were 'smoked' using a bell-shaped puff profile to a defined puff count of 12 puffs' [17]                                                                                                                                                                                                                                                                                                                                                                                                                                                                                                                                                                                                                                                                                                                                                                                                                                                                                                                                                                                                                                                                                                                                                                                                                                                                                                                                                                                                                                                                                                                                                                                                                                                                                                                                                                                                                                                                                                                                                                                                                                                                                                                                    |                  |                  |                          |                          |      |               |               |               |              |  |  |  |                    |            |            |            |                         |            |            |          |                            |            |            |          |                             |             |             |          |                  |  |  |  |                          |            |          |             |                         |          |          |            |                            |            |            |          |                         |             |             |             |                     |              |             |          |                           |             |             |             |                    |            |            |           |                                |             |             |          |                                                     |  |  |  |                     |             |             |            |                    |               |               |            |                   |             |             |          |                          |               |               |            |                          |               |               |            |                    |               |               |            |
| <b>Outcome/Key findings</b>   | Yields of HPHC in the aerosol of THS regular and menthol tobacco sticks and in comparison to reference cigarette                                                                                                                                                                                                                                                                                                                                                                                                                                                                                                                                                                                                                                                                                                                                                                                                                                                                                                                                                                                                                                                                                                                                                                                                                                                                                                                                                                                                                                                                                                                                                                                                                                                                                                                                                                                                                                                                                                                                                                                                                                                                                                                                                                                                                                                                                                  |                  |                  |                          |                          |      |               |               |               |              |  |  |  |                    |            |            |            |                         |            |            |          |                            |            |            |          |                             |             |             |          |                  |  |  |  |                          |            |          |             |                         |          |          |            |                            |            |            |          |                         |             |             |             |                     |              |             |          |                           |             |             |             |                    |            |            |           |                                |             |             |          |                                                     |  |  |  |                     |             |             |            |                    |               |               |            |                   |             |             |          |                          |               |               |            |                          |               |               |            |                    |               |               |            |
|                               | <table border="1"> <thead> <tr> <th></th> <th>THS 2.2 regular*</th> <th>THS 2.2 menthol*</th> <th>3R4F reference cigarette</th> </tr> <tr> <th>HPHC</th> <th>Mean ± 95% CI</th> <th>Mean ± 95% CI</th> <th>Mean ± 95% CI</th> </tr> </thead> <tbody> <tr> <td colspan="4"><b>Gases</b></td> </tr> <tr> <td>Ammonia (µg/stick)</td> <td>14.2 ± 1.1</td> <td>13.8 ± 0.7</td> <td>39.3 ± 3.2</td> </tr> <tr> <td>Nitric oxide (µg/stick)</td> <td>16.8 ± 2.3</td> <td>12.3 ± 1.7</td> <td>491 ± 38</td> </tr> <tr> <td>Nitrogen oxides (µg/stick)</td> <td>17.3 ± 2.6</td> <td>12.6 ± 1.7</td> <td>537 ± 43</td> </tr> <tr> <td>Hydrogen cyanide (µg/stick)</td> <td>4.81 ± 0.35</td> <td>5.14 ± 0.70</td> <td>493 ± 78</td> </tr> <tr> <td colspan="4"><b>Carbonyls</b></td> </tr> <tr> <td>Butyraldehyde (µg/stick)</td> <td>26.1 ± 2.3</td> <td>26.7 ± 2</td> <td>88.4 ± 10.7</td> </tr> <tr> <td>Acetaldehyde (µg/stick)</td> <td>219 ± 31</td> <td>205 ± 12</td> <td>1555 ± 184</td> </tr> <tr> <td>Propionaldehyde (µg/stick)</td> <td>14.5 ± 2.4</td> <td>13.9 ± 0.7</td> <td>125 ± 16</td> </tr> <tr> <td>Formaldehyde (µg/stick)</td> <td>5.53 ± 0.69</td> <td>4.55 ± 0.25</td> <td>56.5 ± 12.1</td> </tr> <tr> <td>Acrolein (µg/stick)</td> <td>11.30 ± 2.36</td> <td>9.15 ± 0.43</td> <td>154 ± 20</td> </tr> <tr> <td>Crotonaldehyde (µg/stick)</td> <td>4.14 ± 0.23</td> <td>3.24 ± 0.21</td> <td>68.8 ± 14.4</td> </tr> <tr> <td>Acetone (µg/stick)</td> <td>40.7 ± 6.2</td> <td>39.4 ± 2.3</td> <td>736 ± 129</td> </tr> <tr> <td>Methyl ethyl ketone (µg/stick)</td> <td>7.18 ± 1.19</td> <td>6.93 ± 0.64</td> <td>187 ± 30</td> </tr> <tr> <td colspan="4"><b>Volatile and semi-volatile organic compounds</b></td> </tr> <tr> <td>Pyridine (µg/stick)</td> <td>7.54 ± 0.26</td> <td>7.21 ± 0.25</td> <td>36.1 ± 2.2</td> </tr> <tr> <td>Styrene (µg/stick)</td> <td>0.608 ± 0.058</td> <td>0.561 ± 0.033</td> <td>24.5 ± 1.2</td> </tr> <tr> <td>Toluene(µg/stick)</td> <td>2.59 ± 0.43</td> <td>2.39 ± 0.16</td> <td>188 ± 11</td> </tr> <tr> <td>Acrylonitrile (µg/stick)</td> <td>0.258 ± 0.041</td> <td>0.220 ± 0.014</td> <td>31.9 ± 1.8</td> </tr> <tr> <td>1,3-Butadiene (µg/stick)</td> <td>0.294 ± 0.042</td> <td>0.265 ± 0.024</td> <td>63.8 ± 3.5</td> </tr> <tr> <td>Benzene (µg/stick)</td> <td>0.649 ± 0.074</td> <td>0.640 ± 0.040</td> <td>97.6 ± 4.7</td> </tr> </tbody> </table> |                  | THS 2.2 regular* | THS 2.2 menthol*         | 3R4F reference cigarette | HPHC | Mean ± 95% CI | Mean ± 95% CI | Mean ± 95% CI | <b>Gases</b> |  |  |  | Ammonia (µg/stick) | 14.2 ± 1.1 | 13.8 ± 0.7 | 39.3 ± 3.2 | Nitric oxide (µg/stick) | 16.8 ± 2.3 | 12.3 ± 1.7 | 491 ± 38 | Nitrogen oxides (µg/stick) | 17.3 ± 2.6 | 12.6 ± 1.7 | 537 ± 43 | Hydrogen cyanide (µg/stick) | 4.81 ± 0.35 | 5.14 ± 0.70 | 493 ± 78 | <b>Carbonyls</b> |  |  |  | Butyraldehyde (µg/stick) | 26.1 ± 2.3 | 26.7 ± 2 | 88.4 ± 10.7 | Acetaldehyde (µg/stick) | 219 ± 31 | 205 ± 12 | 1555 ± 184 | Propionaldehyde (µg/stick) | 14.5 ± 2.4 | 13.9 ± 0.7 | 125 ± 16 | Formaldehyde (µg/stick) | 5.53 ± 0.69 | 4.55 ± 0.25 | 56.5 ± 12.1 | Acrolein (µg/stick) | 11.30 ± 2.36 | 9.15 ± 0.43 | 154 ± 20 | Crotonaldehyde (µg/stick) | 4.14 ± 0.23 | 3.24 ± 0.21 | 68.8 ± 14.4 | Acetone (µg/stick) | 40.7 ± 6.2 | 39.4 ± 2.3 | 736 ± 129 | Methyl ethyl ketone (µg/stick) | 7.18 ± 1.19 | 6.93 ± 0.64 | 187 ± 30 | <b>Volatile and semi-volatile organic compounds</b> |  |  |  | Pyridine (µg/stick) | 7.54 ± 0.26 | 7.21 ± 0.25 | 36.1 ± 2.2 | Styrene (µg/stick) | 0.608 ± 0.058 | 0.561 ± 0.033 | 24.5 ± 1.2 | Toluene(µg/stick) | 2.59 ± 0.43 | 2.39 ± 0.16 | 188 ± 11 | Acrylonitrile (µg/stick) | 0.258 ± 0.041 | 0.220 ± 0.014 | 31.9 ± 1.8 | 1,3-Butadiene (µg/stick) | 0.294 ± 0.042 | 0.265 ± 0.024 | 63.8 ± 3.5 | Benzene (µg/stick) | 0.649 ± 0.074 | 0.640 ± 0.040 | 97.6 ± 4.7 |
|                               |                                                                                                                                                                                                                                                                                                                                                                                                                                                                                                                                                                                                                                                                                                                                                                                                                                                                                                                                                                                                                                                                                                                                                                                                                                                                                                                                                                                                                                                                                                                                                                                                                                                                                                                                                                                                                                                                                                                                                                                                                                                                                                                                                                                                                                                                                                                                                                                                                   | THS 2.2 regular* | THS 2.2 menthol* | 3R4F reference cigarette |                          |      |               |               |               |              |  |  |  |                    |            |            |            |                         |            |            |          |                            |            |            |          |                             |             |             |          |                  |  |  |  |                          |            |          |             |                         |          |          |            |                            |            |            |          |                         |             |             |             |                     |              |             |          |                           |             |             |             |                    |            |            |           |                                |             |             |          |                                                     |  |  |  |                     |             |             |            |                    |               |               |            |                   |             |             |          |                          |               |               |            |                          |               |               |            |                    |               |               |            |
|                               | HPHC                                                                                                                                                                                                                                                                                                                                                                                                                                                                                                                                                                                                                                                                                                                                                                                                                                                                                                                                                                                                                                                                                                                                                                                                                                                                                                                                                                                                                                                                                                                                                                                                                                                                                                                                                                                                                                                                                                                                                                                                                                                                                                                                                                                                                                                                                                                                                                                                              | Mean ± 95% CI    | Mean ± 95% CI    | Mean ± 95% CI            |                          |      |               |               |               |              |  |  |  |                    |            |            |            |                         |            |            |          |                            |            |            |          |                             |             |             |          |                  |  |  |  |                          |            |          |             |                         |          |          |            |                            |            |            |          |                         |             |             |             |                     |              |             |          |                           |             |             |             |                    |            |            |           |                                |             |             |          |                                                     |  |  |  |                     |             |             |            |                    |               |               |            |                   |             |             |          |                          |               |               |            |                          |               |               |            |                    |               |               |            |
|                               | <b>Gases</b>                                                                                                                                                                                                                                                                                                                                                                                                                                                                                                                                                                                                                                                                                                                                                                                                                                                                                                                                                                                                                                                                                                                                                                                                                                                                                                                                                                                                                                                                                                                                                                                                                                                                                                                                                                                                                                                                                                                                                                                                                                                                                                                                                                                                                                                                                                                                                                                                      |                  |                  |                          |                          |      |               |               |               |              |  |  |  |                    |            |            |            |                         |            |            |          |                            |            |            |          |                             |             |             |          |                  |  |  |  |                          |            |          |             |                         |          |          |            |                            |            |            |          |                         |             |             |             |                     |              |             |          |                           |             |             |             |                    |            |            |           |                                |             |             |          |                                                     |  |  |  |                     |             |             |            |                    |               |               |            |                   |             |             |          |                          |               |               |            |                          |               |               |            |                    |               |               |            |
|                               | Ammonia (µg/stick)                                                                                                                                                                                                                                                                                                                                                                                                                                                                                                                                                                                                                                                                                                                                                                                                                                                                                                                                                                                                                                                                                                                                                                                                                                                                                                                                                                                                                                                                                                                                                                                                                                                                                                                                                                                                                                                                                                                                                                                                                                                                                                                                                                                                                                                                                                                                                                                                | 14.2 ± 1.1       | 13.8 ± 0.7       | 39.3 ± 3.2               |                          |      |               |               |               |              |  |  |  |                    |            |            |            |                         |            |            |          |                            |            |            |          |                             |             |             |          |                  |  |  |  |                          |            |          |             |                         |          |          |            |                            |            |            |          |                         |             |             |             |                     |              |             |          |                           |             |             |             |                    |            |            |           |                                |             |             |          |                                                     |  |  |  |                     |             |             |            |                    |               |               |            |                   |             |             |          |                          |               |               |            |                          |               |               |            |                    |               |               |            |
|                               | Nitric oxide (µg/stick)                                                                                                                                                                                                                                                                                                                                                                                                                                                                                                                                                                                                                                                                                                                                                                                                                                                                                                                                                                                                                                                                                                                                                                                                                                                                                                                                                                                                                                                                                                                                                                                                                                                                                                                                                                                                                                                                                                                                                                                                                                                                                                                                                                                                                                                                                                                                                                                           | 16.8 ± 2.3       | 12.3 ± 1.7       | 491 ± 38                 |                          |      |               |               |               |              |  |  |  |                    |            |            |            |                         |            |            |          |                            |            |            |          |                             |             |             |          |                  |  |  |  |                          |            |          |             |                         |          |          |            |                            |            |            |          |                         |             |             |             |                     |              |             |          |                           |             |             |             |                    |            |            |           |                                |             |             |          |                                                     |  |  |  |                     |             |             |            |                    |               |               |            |                   |             |             |          |                          |               |               |            |                          |               |               |            |                    |               |               |            |
|                               | Nitrogen oxides (µg/stick)                                                                                                                                                                                                                                                                                                                                                                                                                                                                                                                                                                                                                                                                                                                                                                                                                                                                                                                                                                                                                                                                                                                                                                                                                                                                                                                                                                                                                                                                                                                                                                                                                                                                                                                                                                                                                                                                                                                                                                                                                                                                                                                                                                                                                                                                                                                                                                                        | 17.3 ± 2.6       | 12.6 ± 1.7       | 537 ± 43                 |                          |      |               |               |               |              |  |  |  |                    |            |            |            |                         |            |            |          |                            |            |            |          |                             |             |             |          |                  |  |  |  |                          |            |          |             |                         |          |          |            |                            |            |            |          |                         |             |             |             |                     |              |             |          |                           |             |             |             |                    |            |            |           |                                |             |             |          |                                                     |  |  |  |                     |             |             |            |                    |               |               |            |                   |             |             |          |                          |               |               |            |                          |               |               |            |                    |               |               |            |
|                               | Hydrogen cyanide (µg/stick)                                                                                                                                                                                                                                                                                                                                                                                                                                                                                                                                                                                                                                                                                                                                                                                                                                                                                                                                                                                                                                                                                                                                                                                                                                                                                                                                                                                                                                                                                                                                                                                                                                                                                                                                                                                                                                                                                                                                                                                                                                                                                                                                                                                                                                                                                                                                                                                       | 4.81 ± 0.35      | 5.14 ± 0.70      | 493 ± 78                 |                          |      |               |               |               |              |  |  |  |                    |            |            |            |                         |            |            |          |                            |            |            |          |                             |             |             |          |                  |  |  |  |                          |            |          |             |                         |          |          |            |                            |            |            |          |                         |             |             |             |                     |              |             |          |                           |             |             |             |                    |            |            |           |                                |             |             |          |                                                     |  |  |  |                     |             |             |            |                    |               |               |            |                   |             |             |          |                          |               |               |            |                          |               |               |            |                    |               |               |            |
|                               | <b>Carbonyls</b>                                                                                                                                                                                                                                                                                                                                                                                                                                                                                                                                                                                                                                                                                                                                                                                                                                                                                                                                                                                                                                                                                                                                                                                                                                                                                                                                                                                                                                                                                                                                                                                                                                                                                                                                                                                                                                                                                                                                                                                                                                                                                                                                                                                                                                                                                                                                                                                                  |                  |                  |                          |                          |      |               |               |               |              |  |  |  |                    |            |            |            |                         |            |            |          |                            |            |            |          |                             |             |             |          |                  |  |  |  |                          |            |          |             |                         |          |          |            |                            |            |            |          |                         |             |             |             |                     |              |             |          |                           |             |             |             |                    |            |            |           |                                |             |             |          |                                                     |  |  |  |                     |             |             |            |                    |               |               |            |                   |             |             |          |                          |               |               |            |                          |               |               |            |                    |               |               |            |
|                               | Butyraldehyde (µg/stick)                                                                                                                                                                                                                                                                                                                                                                                                                                                                                                                                                                                                                                                                                                                                                                                                                                                                                                                                                                                                                                                                                                                                                                                                                                                                                                                                                                                                                                                                                                                                                                                                                                                                                                                                                                                                                                                                                                                                                                                                                                                                                                                                                                                                                                                                                                                                                                                          | 26.1 ± 2.3       | 26.7 ± 2         | 88.4 ± 10.7              |                          |      |               |               |               |              |  |  |  |                    |            |            |            |                         |            |            |          |                            |            |            |          |                             |             |             |          |                  |  |  |  |                          |            |          |             |                         |          |          |            |                            |            |            |          |                         |             |             |             |                     |              |             |          |                           |             |             |             |                    |            |            |           |                                |             |             |          |                                                     |  |  |  |                     |             |             |            |                    |               |               |            |                   |             |             |          |                          |               |               |            |                          |               |               |            |                    |               |               |            |
|                               | Acetaldehyde (µg/stick)                                                                                                                                                                                                                                                                                                                                                                                                                                                                                                                                                                                                                                                                                                                                                                                                                                                                                                                                                                                                                                                                                                                                                                                                                                                                                                                                                                                                                                                                                                                                                                                                                                                                                                                                                                                                                                                                                                                                                                                                                                                                                                                                                                                                                                                                                                                                                                                           | 219 ± 31         | 205 ± 12         | 1555 ± 184               |                          |      |               |               |               |              |  |  |  |                    |            |            |            |                         |            |            |          |                            |            |            |          |                             |             |             |          |                  |  |  |  |                          |            |          |             |                         |          |          |            |                            |            |            |          |                         |             |             |             |                     |              |             |          |                           |             |             |             |                    |            |            |           |                                |             |             |          |                                                     |  |  |  |                     |             |             |            |                    |               |               |            |                   |             |             |          |                          |               |               |            |                          |               |               |            |                    |               |               |            |
|                               | Propionaldehyde (µg/stick)                                                                                                                                                                                                                                                                                                                                                                                                                                                                                                                                                                                                                                                                                                                                                                                                                                                                                                                                                                                                                                                                                                                                                                                                                                                                                                                                                                                                                                                                                                                                                                                                                                                                                                                                                                                                                                                                                                                                                                                                                                                                                                                                                                                                                                                                                                                                                                                        | 14.5 ± 2.4       | 13.9 ± 0.7       | 125 ± 16                 |                          |      |               |               |               |              |  |  |  |                    |            |            |            |                         |            |            |          |                            |            |            |          |                             |             |             |          |                  |  |  |  |                          |            |          |             |                         |          |          |            |                            |            |            |          |                         |             |             |             |                     |              |             |          |                           |             |             |             |                    |            |            |           |                                |             |             |          |                                                     |  |  |  |                     |             |             |            |                    |               |               |            |                   |             |             |          |                          |               |               |            |                          |               |               |            |                    |               |               |            |
|                               | Formaldehyde (µg/stick)                                                                                                                                                                                                                                                                                                                                                                                                                                                                                                                                                                                                                                                                                                                                                                                                                                                                                                                                                                                                                                                                                                                                                                                                                                                                                                                                                                                                                                                                                                                                                                                                                                                                                                                                                                                                                                                                                                                                                                                                                                                                                                                                                                                                                                                                                                                                                                                           | 5.53 ± 0.69      | 4.55 ± 0.25      | 56.5 ± 12.1              |                          |      |               |               |               |              |  |  |  |                    |            |            |            |                         |            |            |          |                            |            |            |          |                             |             |             |          |                  |  |  |  |                          |            |          |             |                         |          |          |            |                            |            |            |          |                         |             |             |             |                     |              |             |          |                           |             |             |             |                    |            |            |           |                                |             |             |          |                                                     |  |  |  |                     |             |             |            |                    |               |               |            |                   |             |             |          |                          |               |               |            |                          |               |               |            |                    |               |               |            |
|                               | Acrolein (µg/stick)                                                                                                                                                                                                                                                                                                                                                                                                                                                                                                                                                                                                                                                                                                                                                                                                                                                                                                                                                                                                                                                                                                                                                                                                                                                                                                                                                                                                                                                                                                                                                                                                                                                                                                                                                                                                                                                                                                                                                                                                                                                                                                                                                                                                                                                                                                                                                                                               | 11.30 ± 2.36     | 9.15 ± 0.43      | 154 ± 20                 |                          |      |               |               |               |              |  |  |  |                    |            |            |            |                         |            |            |          |                            |            |            |          |                             |             |             |          |                  |  |  |  |                          |            |          |             |                         |          |          |            |                            |            |            |          |                         |             |             |             |                     |              |             |          |                           |             |             |             |                    |            |            |           |                                |             |             |          |                                                     |  |  |  |                     |             |             |            |                    |               |               |            |                   |             |             |          |                          |               |               |            |                          |               |               |            |                    |               |               |            |
|                               | Crotonaldehyde (µg/stick)                                                                                                                                                                                                                                                                                                                                                                                                                                                                                                                                                                                                                                                                                                                                                                                                                                                                                                                                                                                                                                                                                                                                                                                                                                                                                                                                                                                                                                                                                                                                                                                                                                                                                                                                                                                                                                                                                                                                                                                                                                                                                                                                                                                                                                                                                                                                                                                         | 4.14 ± 0.23      | 3.24 ± 0.21      | 68.8 ± 14.4              |                          |      |               |               |               |              |  |  |  |                    |            |            |            |                         |            |            |          |                            |            |            |          |                             |             |             |          |                  |  |  |  |                          |            |          |             |                         |          |          |            |                            |            |            |          |                         |             |             |             |                     |              |             |          |                           |             |             |             |                    |            |            |           |                                |             |             |          |                                                     |  |  |  |                     |             |             |            |                    |               |               |            |                   |             |             |          |                          |               |               |            |                          |               |               |            |                    |               |               |            |
|                               | Acetone (µg/stick)                                                                                                                                                                                                                                                                                                                                                                                                                                                                                                                                                                                                                                                                                                                                                                                                                                                                                                                                                                                                                                                                                                                                                                                                                                                                                                                                                                                                                                                                                                                                                                                                                                                                                                                                                                                                                                                                                                                                                                                                                                                                                                                                                                                                                                                                                                                                                                                                | 40.7 ± 6.2       | 39.4 ± 2.3       | 736 ± 129                |                          |      |               |               |               |              |  |  |  |                    |            |            |            |                         |            |            |          |                            |            |            |          |                             |             |             |          |                  |  |  |  |                          |            |          |             |                         |          |          |            |                            |            |            |          |                         |             |             |             |                     |              |             |          |                           |             |             |             |                    |            |            |           |                                |             |             |          |                                                     |  |  |  |                     |             |             |            |                    |               |               |            |                   |             |             |          |                          |               |               |            |                          |               |               |            |                    |               |               |            |
|                               | Methyl ethyl ketone (µg/stick)                                                                                                                                                                                                                                                                                                                                                                                                                                                                                                                                                                                                                                                                                                                                                                                                                                                                                                                                                                                                                                                                                                                                                                                                                                                                                                                                                                                                                                                                                                                                                                                                                                                                                                                                                                                                                                                                                                                                                                                                                                                                                                                                                                                                                                                                                                                                                                                    | 7.18 ± 1.19      | 6.93 ± 0.64      | 187 ± 30                 |                          |      |               |               |               |              |  |  |  |                    |            |            |            |                         |            |            |          |                            |            |            |          |                             |             |             |          |                  |  |  |  |                          |            |          |             |                         |          |          |            |                            |            |            |          |                         |             |             |             |                     |              |             |          |                           |             |             |             |                    |            |            |           |                                |             |             |          |                                                     |  |  |  |                     |             |             |            |                    |               |               |            |                   |             |             |          |                          |               |               |            |                          |               |               |            |                    |               |               |            |
|                               | <b>Volatile and semi-volatile organic compounds</b>                                                                                                                                                                                                                                                                                                                                                                                                                                                                                                                                                                                                                                                                                                                                                                                                                                                                                                                                                                                                                                                                                                                                                                                                                                                                                                                                                                                                                                                                                                                                                                                                                                                                                                                                                                                                                                                                                                                                                                                                                                                                                                                                                                                                                                                                                                                                                               |                  |                  |                          |                          |      |               |               |               |              |  |  |  |                    |            |            |            |                         |            |            |          |                            |            |            |          |                             |             |             |          |                  |  |  |  |                          |            |          |             |                         |          |          |            |                            |            |            |          |                         |             |             |             |                     |              |             |          |                           |             |             |             |                    |            |            |           |                                |             |             |          |                                                     |  |  |  |                     |             |             |            |                    |               |               |            |                   |             |             |          |                          |               |               |            |                          |               |               |            |                    |               |               |            |
|                               | Pyridine (µg/stick)                                                                                                                                                                                                                                                                                                                                                                                                                                                                                                                                                                                                                                                                                                                                                                                                                                                                                                                                                                                                                                                                                                                                                                                                                                                                                                                                                                                                                                                                                                                                                                                                                                                                                                                                                                                                                                                                                                                                                                                                                                                                                                                                                                                                                                                                                                                                                                                               | 7.54 ± 0.26      | 7.21 ± 0.25      | 36.1 ± 2.2               |                          |      |               |               |               |              |  |  |  |                    |            |            |            |                         |            |            |          |                            |            |            |          |                             |             |             |          |                  |  |  |  |                          |            |          |             |                         |          |          |            |                            |            |            |          |                         |             |             |             |                     |              |             |          |                           |             |             |             |                    |            |            |           |                                |             |             |          |                                                     |  |  |  |                     |             |             |            |                    |               |               |            |                   |             |             |          |                          |               |               |            |                          |               |               |            |                    |               |               |            |
| Styrene (µg/stick)            | 0.608 ± 0.058                                                                                                                                                                                                                                                                                                                                                                                                                                                                                                                                                                                                                                                                                                                                                                                                                                                                                                                                                                                                                                                                                                                                                                                                                                                                                                                                                                                                                                                                                                                                                                                                                                                                                                                                                                                                                                                                                                                                                                                                                                                                                                                                                                                                                                                                                                                                                                                                     | 0.561 ± 0.033    | 24.5 ± 1.2       |                          |                          |      |               |               |               |              |  |  |  |                    |            |            |            |                         |            |            |          |                            |            |            |          |                             |             |             |          |                  |  |  |  |                          |            |          |             |                         |          |          |            |                            |            |            |          |                         |             |             |             |                     |              |             |          |                           |             |             |             |                    |            |            |           |                                |             |             |          |                                                     |  |  |  |                     |             |             |            |                    |               |               |            |                   |             |             |          |                          |               |               |            |                          |               |               |            |                    |               |               |            |
| Toluene(µg/stick)             | 2.59 ± 0.43                                                                                                                                                                                                                                                                                                                                                                                                                                                                                                                                                                                                                                                                                                                                                                                                                                                                                                                                                                                                                                                                                                                                                                                                                                                                                                                                                                                                                                                                                                                                                                                                                                                                                                                                                                                                                                                                                                                                                                                                                                                                                                                                                                                                                                                                                                                                                                                                       | 2.39 ± 0.16      | 188 ± 11         |                          |                          |      |               |               |               |              |  |  |  |                    |            |            |            |                         |            |            |          |                            |            |            |          |                             |             |             |          |                  |  |  |  |                          |            |          |             |                         |          |          |            |                            |            |            |          |                         |             |             |             |                     |              |             |          |                           |             |             |             |                    |            |            |           |                                |             |             |          |                                                     |  |  |  |                     |             |             |            |                    |               |               |            |                   |             |             |          |                          |               |               |            |                          |               |               |            |                    |               |               |            |
| Acrylonitrile (µg/stick)      | 0.258 ± 0.041                                                                                                                                                                                                                                                                                                                                                                                                                                                                                                                                                                                                                                                                                                                                                                                                                                                                                                                                                                                                                                                                                                                                                                                                                                                                                                                                                                                                                                                                                                                                                                                                                                                                                                                                                                                                                                                                                                                                                                                                                                                                                                                                                                                                                                                                                                                                                                                                     | 0.220 ± 0.014    | 31.9 ± 1.8       |                          |                          |      |               |               |               |              |  |  |  |                    |            |            |            |                         |            |            |          |                            |            |            |          |                             |             |             |          |                  |  |  |  |                          |            |          |             |                         |          |          |            |                            |            |            |          |                         |             |             |             |                     |              |             |          |                           |             |             |             |                    |            |            |           |                                |             |             |          |                                                     |  |  |  |                     |             |             |            |                    |               |               |            |                   |             |             |          |                          |               |               |            |                          |               |               |            |                    |               |               |            |
| 1,3-Butadiene (µg/stick)      | 0.294 ± 0.042                                                                                                                                                                                                                                                                                                                                                                                                                                                                                                                                                                                                                                                                                                                                                                                                                                                                                                                                                                                                                                                                                                                                                                                                                                                                                                                                                                                                                                                                                                                                                                                                                                                                                                                                                                                                                                                                                                                                                                                                                                                                                                                                                                                                                                                                                                                                                                                                     | 0.265 ± 0.024    | 63.8 ± 3.5       |                          |                          |      |               |               |               |              |  |  |  |                    |            |            |            |                         |            |            |          |                            |            |            |          |                             |             |             |          |                  |  |  |  |                          |            |          |             |                         |          |          |            |                            |            |            |          |                         |             |             |             |                     |              |             |          |                           |             |             |             |                    |            |            |           |                                |             |             |          |                                                     |  |  |  |                     |             |             |            |                    |               |               |            |                   |             |             |          |                          |               |               |            |                          |               |               |            |                    |               |               |            |
| Benzene (µg/stick)            | 0.649 ± 0.074                                                                                                                                                                                                                                                                                                                                                                                                                                                                                                                                                                                                                                                                                                                                                                                                                                                                                                                                                                                                                                                                                                                                                                                                                                                                                                                                                                                                                                                                                                                                                                                                                                                                                                                                                                                                                                                                                                                                                                                                                                                                                                                                                                                                                                                                                                                                                                                                     | 0.640 ± 0.040    | 97.6 ± 4.7       |                          |                          |      |               |               |               |              |  |  |  |                    |            |            |            |                         |            |            |          |                            |            |            |          |                             |             |             |          |                  |  |  |  |                          |            |          |             |                         |          |          |            |                            |            |            |          |                         |             |             |             |                     |              |             |          |                           |             |             |             |                    |            |            |           |                                |             |             |          |                                                     |  |  |  |                     |             |             |            |                    |               |               |            |                   |             |             |          |                          |               |               |            |                          |               |               |            |                    |               |               |            |

|                                         |               |               |               |
|-----------------------------------------|---------------|---------------|---------------|
| Isoprene (µg/stick)                     | 2.35 ± 0.39   | 2.11 ± 0.18   | 798 ± 49      |
| Quinoline (µg/stick)                    | <0.012        | <0.012        | 0.513 ± 0.023 |
| <b>Polycyclic aromatic hydrocarbons</b> |               |               |               |
| Benzo[a]pyrene (ng/stick)               | <1.00         | 1.29 ± 0.10   | 14.2 ± 0.3    |
| Benz [a]anthracene (ng/stick)           | 1.45 ± 0.14   | 2.49 ± 0.17   | 28.0 ± 0.6    |
| Pyrene (ng/stick)                       | <5.00         | 9.06 ± 0.68   | 87.3 ± 2.5    |
| Dibenz [a,h]anthracene (ng/stick)       | <0.100        | <0.100        | 1.70 ± 0.11   |
| <b>Phenols and acid derivatives</b>     |               |               |               |
| Acrylamide (µg/stick)                   | 1.73 ± 0.12   | 1.91 ± 0.16   | 4.8 ± 0.3     |
| Acetamide (µg/stick)                    | 4.02 ± 0.18   | 4.30 ± 0.24   | 13.9 ± 0.5    |
| Catechol (µg/stick)                     | 16.3 ± 1.5    | 17.1 ± 1.1    | 91.4 ± 5.6    |
| Phenol (µg/stick)                       | 1.16 ± 0.12   | 1.60 ± 0.4    | 13.6 ± 0.9    |
| Hydroquinone (µg/stick)                 | 8.10 ± 0.48   | 8.98 ± 1.02   | 83.1 ± 5.5    |
| o-Cresol (µg/stick)                     | 0.069 ± 0.008 | 0.095 ± 0.025 | 4.47 ± 0.16   |
| m-Cresol (µg/stick)                     | 0.029 ± 0.004 | 0.033 ± 0.006 | 3.03 ± 0.08   |
| p-Cresol (µg/stick)                     | 0.072 ± 0.008 | 0.083 ± 0.010 | 9.17 ± 0.44   |
| <b>Aromatic amines</b>                  |               |               |               |
| o-Toluidine (ng/stick)                  | 1.260 ± 0.187 | 0.777 ± 0.287 | 85.5 ± 2.7    |
| 1-Aminonaphthalene (ng/stick)           | 0.077         | 0.086         | 20.8 ± 1.3    |
| 2-Aminonaphthalene (ng/stick)           | 0.046 ± 0.008 | <0.035        | 11.0 ± 0.6    |
| 3-Aminobiphenyl (ng/stick)              | <0.032        | 0.032         | 3.77 ± 0.47   |
| 4-Aminobiphenyl (ng/stick)              | <0.051        | <0.051        | 3.26 ± 0.12   |
| <b>Tobacco-specific nitrosamines</b>    |               |               |               |
| NAB (ng/stick)                          | <3.15         | <3.15         | 33.7 ± 8.5    |
| NAT (ng/stick)                          | 20.5 ± 0.5    | 19.7 ± 3.6    | 318 ± 74      |
| NNN (ng/stick)                          | 17.2 ± 1.25   | 13.7 ± 1.21   | 309 ± 41      |
| NNK (ng/stick)                          | 6.7 ± 0.6     | 5.9 ± 0.4     | 266 ± 15      |
| <b>Elements</b>                         |               |               |               |
| Selenium (ng/stick)                     | <0.550        | 0.780         | 1.62 ± 0.32   |
| Mercury (ng/stick)                      | 1.17 ± 0.05   | 1.34 ± 0.18   | 4.80 ± 0.13   |
| Arsenic (ng/stick)                      | <1.13         | <1.13         | 8.51 ± 0.34   |
| Lead (ng/stick)                         | <3.35         | <3.35         | 37.0 ± 0.7    |
| Cadmium (ng/stick)                      | <0.350        | <0.350        | 161 ± 4       |
| Nickel (ng/stick)                       | <0.55         | <0.55         | <0.55         |
| Chromium                                | <0.55         | <0.55         | <0.55         |
| <b>Epoxides and vinyl chloride</b>      |               |               |               |

|                               |                                                                                                                                                                                                                                                                                                                                                                                                                                                                                             |               |               |             |
|-------------------------------|---------------------------------------------------------------------------------------------------------------------------------------------------------------------------------------------------------------------------------------------------------------------------------------------------------------------------------------------------------------------------------------------------------------------------------------------------------------------------------------------|---------------|---------------|-------------|
|                               | Propylene oxide (µg/stick)                                                                                                                                                                                                                                                                                                                                                                                                                                                                  | 0.148 ± 0.018 | 0.149 ± 0.017 | 1.32 ± 0.12 |
|                               | Vinyl chloride (ng/stick)                                                                                                                                                                                                                                                                                                                                                                                                                                                                   | <3.54         | <3.54         | 96.7 ± 2.0  |
|                               | Ethylene oxide (µg/stick)                                                                                                                                                                                                                                                                                                                                                                                                                                                                   | 0.201 ± 0.014 | 0.202 ± 0.013 | 29.4 ± 2.0  |
|                               | <b>Other compounds</b>                                                                                                                                                                                                                                                                                                                                                                                                                                                                      |               |               |             |
|                               | Water (mg/stick)                                                                                                                                                                                                                                                                                                                                                                                                                                                                            | 36.5 ± 3.1    | 29.7 ± 3.6    | 15.8 ± 2.9  |
|                               | Glycerin (mg/stick)                                                                                                                                                                                                                                                                                                                                                                                                                                                                         | 4.63 ± 0.83   | 3.94 ± 0.87   | 2.42 ± 0.14 |
|                               | Total particulate matter (mg/stick)                                                                                                                                                                                                                                                                                                                                                                                                                                                         | 48.2 ± 2.4    | 43.5 ± 1.5    | 49.0 ± 4.8  |
|                               | Nicotine (mg/stick)                                                                                                                                                                                                                                                                                                                                                                                                                                                                         | 1.32 ± 0.16   | 1.21 ± 0.09   | 1.89 ± 0.16 |
|                               | Nicotine-free dry particulate matter (mg/stick)                                                                                                                                                                                                                                                                                                                                                                                                                                             | 10.3 ± 0.9    | 12.6 ± 2.2    | 31.2 ± 1.8  |
|                               | Nitrobenzene (ng/stick)                                                                                                                                                                                                                                                                                                                                                                                                                                                                     | <0.188        | 0.335 ± 0.164 | 8.62 ± 1.10 |
|                               | Carbon monoxide (mg/stick)                                                                                                                                                                                                                                                                                                                                                                                                                                                                  | 0.531 ± 0.068 | 0.594 ± 0.110 | 32.8 ± 2.4  |
|                               | Menthol (mg/stick)                                                                                                                                                                                                                                                                                                                                                                                                                                                                          | N/A           | 2.62 ± 0.1    | N/A         |
|                               | * only results of FR1 and FR1 M versions of tobacco sticks provided                                                                                                                                                                                                                                                                                                                                                                                                                         |               |               |             |
| <b>Findings overview</b>      | <ul style="list-style-type: none"> <li>• There are significantly lower concentrations of HPHCs in the mainstream aerosol of THS2.2 compared with the mainstream smoke of the 3R4F reference cigarette</li> <li>• The reductions in the concentrations of most HPHCs in the THS2.2 aerosol were greater than 90% when compared with 3R4F</li> <li>• Tobacco combustion of tobacco did not appear when using the THS2.2 with more intense puffing regimens than the HCl conditions</li> </ul> |               |               |             |
| <b>Authors, study year</b>    | Schaller et al., 2016 [18]                                                                                                                                                                                                                                                                                                                                                                                                                                                                  |               |               |             |
| <b>Funder/Affiliations</b>    | Affiliations: Philip Morris International R&D, Philip Morris Products S.A., Quai Jeanrenaud 5, 2000 Neuchatel, Switzerland                                                                                                                                                                                                                                                                                                                                                                  |               |               |             |
| <b>Primary aim</b>            | To compare levels of HPHC in mainstream IQOS emissions from regular and menthol tobacco sticks with those in mainstream cigarette smoke                                                                                                                                                                                                                                                                                                                                                     |               |               |             |
| <b>Products used</b>          | <ul style="list-style-type: none"> <li>• Reference cigarette 3R4F</li> <li>• THS 2.2 (IQOS) used with 43 experimental tobacco blends</li> </ul>                                                                                                                                                                                                                                                                                                                                             |               |               |             |
| <b>Methods</b>                | <b>Design:</b> Laboratory comparison study using smoking machines<br><b>Study time and setting:</b> Switzerland, time not reported<br><b>Measures:</b> For tested products mainstream smoke and aerosol was produced using Health Canada Intense (HCl) machine smoking regime                                                                                                                                                                                                               |               |               |             |
| <b>Participants</b>           | Not reported                                                                                                                                                                                                                                                                                                                                                                                                                                                                                |               |               |             |
| <b>Interventions/Exposure</b> | Each tobacco stick and 3R4F reference cigarettes were conditioned following the ISO 3402 protocol, then mainstream aerosol was produced from the stick using the Health Canada intense machine-smoking regimen.                                                                                                                                                                                                                                                                             |               |               |             |
| <b>Outcome/Key findings</b>   | Yields of HPHC in the aerosol of THS control tobacco blend and in comparison to reference cigarette                                                                                                                                                                                                                                                                                                                                                                                         |               |               |             |

|                                                     | HPHC | THS2.2 control tobacco blend | 3R4F reference cigarette |
|-----------------------------------------------------|------|------------------------------|--------------------------|
|                                                     |      | Mean ± 95% CI                | Mean                     |
| <b>Gases</b>                                        |      |                              |                          |
| Ammonia (µg/stick)                                  |      | 12.0 ± 5.2                   | 31.2                     |
| Nitric oxide (µg/stick)                             |      | 13.0 ± 2.4                   | 510                      |
| Nitrogen oxides (µg/stick)                          |      | 13.8 ± 2.4                   | 571                      |
| Carbon monoxide (mg/stick)                          |      | 0.446±0.246                  | 30.6                     |
| <b>Carbonyls</b>                                    |      |                              |                          |
| Butyraldehyde (µg/stick)                            |      | 24.0 ± 8.1                   | 83.5                     |
| Acetaldehyde (µg/stick)                             |      | 211±60                       | 1694                     |
| Propionaldehyde (µg/stick)                          |      | 14.6 ± 10.5                  | 122                      |
| Formaldehyde (µg/stick)                             |      | 10.16 ± 10.08                | 88.9                     |
| Acrolein (µg/stick)                                 |      | 10.96 ± 5.16                 | 161                      |
| Crotonaldehyde (µg/stick)                           |      | <3.29                        | 51.7                     |
| Acetone (µg/stick)                                  |      | 35±11.3                      | 685                      |
| Methyl ethyl ketone (µg/stick)                      |      | 7.95 ± 6.65                  | 183                      |
| <b>Volatile and semi-volatile organic compounds</b> |      |                              |                          |
| Pyridine (µg/stick)                                 |      | 8.27 ± 3.06                  | 31.5                     |
| Styrene (µg/stick)                                  |      | 1.067 ± 2.528                | 16.5                     |
| Quinoline (µg/stick)                                |      | <0.011                       | 0.44                     |
| Resorcinol (µg/stick)                               |      | <0.055                       | 1.75                     |
| Toluene (µg/stick)                                  |      | 2.49 ± 1.69                  | 137                      |
| Acrylonitrile (µg/stick)                            |      | 0.177 ± 0.173                | 24.0                     |
| 1,3-Butadiene (µg/stick)                            |      | 0.272 ± 0.101                | 97.0                     |
| Benzene (µg/stick)                                  |      | 0.700 ± 0.540                | 81.1                     |
| Isoprene (µg/stick)                                 |      | 2.14 ± 0.44                  | 884                      |
| <b>Polycyclic aromatic hydrocarbons</b>             |      |                              |                          |
| Dibenz [a,h]anthracene (ng/stick)                   |      | <0.413                       | 0.79                     |
| Benz [a]anthracene (ng/stick)                       |      | 2.64 ± 2.46                  | 27.2                     |
| Pyrene (ng/stick)                                   |      | 8.01 ± 4.80                  | 79.3                     |
| Benzo[a]pyrene (ng/stick)                           |      | 1.02±0.69                    | 15.0                     |
| <b>Phenols and acid derivatives</b>                 |      |                              |                          |
| Acrylamide (µg/stick)                               |      | 1.85 ± 1.33                  | 4.5                      |
| Acetamide (µg/stick)                                |      | 3.31 ± 1.69                  | 13.0                     |
| Catechol (µg/stick)                                 |      | 13.2 ± 5.6                   | 89.6                     |

|                                                 |               |       |
|-------------------------------------------------|---------------|-------|
| Phenol (µg/stick)                               | 1.12 ± 0.52   | 13.9  |
| Hydroquinone (µg/stick)                         | 6.23 ± 2.46   | 88.3  |
| o-Cresol (µg/stick)                             | 0.052 ± 0.036 | 4.11  |
| m-Cresol (µg/stick)                             | 0.031 ± 0.036 | 3.61  |
| p-Cresol (µg/stick)                             | 0.068 ± 0.097 | 8.86  |
| <b>Aromatic amines</b>                          |               |       |
| o-Toluidine (ng/stick)                          | 1.616 ± 0.883 | 103.9 |
| 1-Aminonaphthalene (ng/stick)                   | 0.069±0.077   | 21.2  |
| 2-Aminonaphthalene (ng/stick)                   | 0.045±0.06    | 16.2  |
| 3-Aminobiphenyl (ng/stick)                      | 0.012±0.012   | 4.09  |
| 4-Aminobiphenyl (ng/stick)                      | 0.012±0.012   | 2.77  |
| <b>Tobacco-specific nitrosamines</b>            |               |       |
| NAB (ng/stick)                                  | 3.01 ± 1.13   | 30.3  |
| NAT (ng/stick)                                  | 17.5 ± 9.3    | 269   |
| NNN (ng/stick)                                  | 14.2 ± 5.9    | 284   |
| NNK (ng/stick)                                  | 7.1 ± 2.8     | 261   |
| <b>Elements</b>                                 |               |       |
| Selenium (ng/stick)                             | <0.83         | 1.49  |
| Mercury (ng/stick)                              | 1.25 ± 0.48   | 4.67  |
| Arsenic (ng/stick)                              | <1.20         | 7.99  |
| Lead (ng/stick)                                 | <1.62         | 31.9  |
| Cadmium (ng/stick)                              | <0.280        | 94    |
| Nickel (ng/stick)                               | <53           | <53   |
| Chromium (ng/stick)                             | <11           | <11   |
| <b>Epoxides and vinyl chloride</b>              |               |       |
| Propylene oxide (µg/stick)                      | 0.078 ± 0.021 | 1.11  |
| Vinyl chloride (ng/stick)                       | <2.19         | 100.8 |
| Ethylene oxide (µg/stick)                       | 0.199 ± 0.141 | 24.1  |
| <b>Other compounds</b>                          |               |       |
| Glycerin (mg/stick)                             | 4.63±1.01     | 2.28  |
| Water (mg/stick)                                | 32.1±6.5      | 15.8  |
| Total particulate matter (mg/stick)             | 54.7±3.2      | 44.7  |
| Nicotine-free dry particulate matter (mg/stick) | 21.2±8.5      | 26.8  |
| Nicotine (mg/stick)                             | 1.38±0.2      | 1.88  |
| Hydrogen cyanide (µg/stick)                     | <4.37         | 364   |

|                               | Nitrobenzene (ng/stick)                                                                                                                                                                                                                                                                                                                                                                                                                                                                                                                                                                                                                                                                                                                   | <37.84                       | <37.84                        |                               |         |  |  |  |           |                       |      |             |      |                              |                              |                               |                               |
|-------------------------------|-------------------------------------------------------------------------------------------------------------------------------------------------------------------------------------------------------------------------------------------------------------------------------------------------------------------------------------------------------------------------------------------------------------------------------------------------------------------------------------------------------------------------------------------------------------------------------------------------------------------------------------------------------------------------------------------------------------------------------------------|------------------------------|-------------------------------|-------------------------------|---------|--|--|--|-----------|-----------------------|------|-------------|------|------------------------------|------------------------------|-------------------------------|-------------------------------|
| <b>Findings overview</b>      | <ul style="list-style-type: none"> <li>The mainstream aerosols produced by 43 different experimental tobacco plug blends in the THS2.2 contained significantly lower concentrations of HPHCs than found in the mainstream smoke of reference cigarette 3R4F. The tobacco blend composition in tobacco sticks had only a minimal impact on the HPHC levels in mainstream aerosols.</li> <li>Ammonia, tobacco specific nitrosamines, nitrogen oxides, poly-aromatic hydrocarbons, acrylamide and acetamide concentrations in the THS2.2 mainstream aerosols showed significant variability across the 43 experimental tobacco sticks blends</li> </ul>                                                                                      |                              |                               |                               |         |  |  |  |           |                       |      |             |      |                              |                              |                               |                               |
| <b>Authors, study year</b>    | Protano et al., 2016 [19]                                                                                                                                                                                                                                                                                                                                                                                                                                                                                                                                                                                                                                                                                                                 |                              |                               |                               |         |  |  |  |           |                       |      |             |      |                              |                              |                               |                               |
| <b>Funder/Affiliations</b>    | <b>Affiliations:</b> <ul style="list-style-type: none"> <li>Department of Public Health and Infectious Diseases, Sapienza University of Rome, Italy</li> <li>Department of Technological Innovations, INAIL, Rome, Italy</li> <li>Centre of Occupational Medicine, Sapienza University of Rome, Italy</li> </ul>                                                                                                                                                                                                                                                                                                                                                                                                                          |                              |                               |                               |         |  |  |  |           |                       |      |             |      |                              |                              |                               |                               |
| <b>Primary aim</b>            | To compare levels of secondhand smoke and emissions between tested tobacco and nicotine products                                                                                                                                                                                                                                                                                                                                                                                                                                                                                                                                                                                                                                          |                              |                               |                               |         |  |  |  |           |                       |      |             |      |                              |                              |                               |                               |
| <b>Products used</b>          | <ul style="list-style-type: none"> <li>IQOS tobacco stick</li> <li>Pall Mall San Francisco cigarette</li> <li>Hand-rolled cigarette (Golden Virginia® tobacco hand-rolled with a Rizla® Blue Regular Rolling Paper)</li> <li>Pen-style e-cigarette (Smooke® E-SMART (L)) filled with Smooke® Light e-liquid (9 mg/ml nicotine)</li> </ul>                                                                                                                                                                                                                                                                                                                                                                                                 |                              |                               |                               |         |  |  |  |           |                       |      |             |      |                              |                              |                               |                               |
| <b>Methods</b>                | <b>Design:</b> Laboratory comparison study using smoking volunteers<br><b>Study time and setting:</b> 2015<br><b>Method description:</b> Submicron particles were measured using a Fast Mobility Particle Sizer spectrometer (FMPS 3091, TSI Inc.) in a room of 52.7 m <sup>3</sup> with a door and a window (0.67 air changes/h in the room). The FMPS 3091 measures particle size distribution in the range 5.6-560 nm using the electrical mobility technique, with a 1-s time resolution.                                                                                                                                                                                                                                             |                              |                               |                               |         |  |  |  |           |                       |      |             |      |                              |                              |                               |                               |
| <b>Participants</b>           | Two researchers of Sapienza University in Rome: 53-year old male and 37-year old female, both smokers at the time of the study                                                                                                                                                                                                                                                                                                                                                                                                                                                                                                                                                                                                            |                              |                               |                               |         |  |  |  |           |                       |      |             |      |                              |                              |                               |                               |
| <b>Interventions/Exposure</b> | <p>To simulate passive exposure of the subjects, the air sampler was placed 2 meters away from the smoker and at 1.5 meters above the floor. The door and the window were opened before each experiment to reach a steady submicron particles concentration; then, the door and the window were kept closed until the end of each experiment.</p> <p>For each experiment, lasting one hour from the cigarette or device ignition, the submicron particles deposition dose was modelled in the human respiratory tree with the Multiple-Path Particle Dosimetry model (MPPD v2.1, ARA 2009). Each experiment was run in triplicate; arithmetic mean values were calculated for each 1-s time measurement and used for data comparison.</p> |                              |                               |                               |         |  |  |  |           |                       |      |             |      |                              |                              |                               |                               |
| <b>Outcome/Key findings</b>   | <b>Number (%) of total deposited submicron particles in different respiratory regions for a normal adult male breathing through nose in rest condition</b> <table border="1" style="width: 100%; border-collapse: collapse;"> <thead> <tr> <th rowspan="2">Respiratory region</th> <th colspan="4">Product</th> </tr> <tr> <th>Cigarette</th> <th>Hand-rolled cigarette</th> <th>IQOS</th> <th>E-cigarette</th> </tr> </thead> <tbody> <tr> <td>Head</td> <td>2.87 x 10<sup>9</sup> (18%)</td> <td>2.24 x 10<sup>9</sup> (17%)</td> <td>0.665 x 10<sup>9</sup> (17%)</td> <td>0.834 x 10<sup>9</sup> (20%)</td> </tr> </tbody> </table>                                                                                                   |                              |                               | Respiratory region            | Product |  |  |  | Cigarette | Hand-rolled cigarette | IQOS | E-cigarette | Head | 2.87 x 10 <sup>9</sup> (18%) | 2.24 x 10 <sup>9</sup> (17%) | 0.665 x 10 <sup>9</sup> (17%) | 0.834 x 10 <sup>9</sup> (20%) |
| Respiratory region            | Product                                                                                                                                                                                                                                                                                                                                                                                                                                                                                                                                                                                                                                                                                                                                   |                              |                               |                               |         |  |  |  |           |                       |      |             |      |                              |                              |                               |                               |
|                               | Cigarette                                                                                                                                                                                                                                                                                                                                                                                                                                                                                                                                                                                                                                                                                                                                 | Hand-rolled cigarette        | IQOS                          | E-cigarette                   |         |  |  |  |           |                       |      |             |      |                              |                              |                               |                               |
| Head                          | 2.87 x 10 <sup>9</sup> (18%)                                                                                                                                                                                                                                                                                                                                                                                                                                                                                                                                                                                                                                                                                                              | 2.24 x 10 <sup>9</sup> (17%) | 0.665 x 10 <sup>9</sup> (17%) | 0.834 x 10 <sup>9</sup> (20%) |         |  |  |  |           |                       |      |             |      |                              |                              |                               |                               |



|                            |                                                                                                                                                                                                                                                                                                                                                                                                                                                                                                                                                                                                                                                                                                                                                                                                                                                           |                              |                              |                              |                              |                              |          |                              |                              |                              |                              |       |                         |                         |                        |                        |
|----------------------------|-----------------------------------------------------------------------------------------------------------------------------------------------------------------------------------------------------------------------------------------------------------------------------------------------------------------------------------------------------------------------------------------------------------------------------------------------------------------------------------------------------------------------------------------------------------------------------------------------------------------------------------------------------------------------------------------------------------------------------------------------------------------------------------------------------------------------------------------------------------|------------------------------|------------------------------|------------------------------|------------------------------|------------------------------|----------|------------------------------|------------------------------|------------------------------|------------------------------|-------|-------------------------|-------------------------|------------------------|------------------------|
|                            | <table border="1"> <tr> <td>Tracheo-bronchial</td> <td>4.85 x 10<sup>9</sup> (30%)</td> <td>3.91 x 10<sup>9</sup> (30%)</td> <td>1.18 x 10<sup>9</sup> (30%)</td> <td>1.33 x 10<sup>9</sup> (32%)</td> </tr> <tr> <td>Alveolar</td> <td>8.39 x 10<sup>9</sup> (52%)</td> <td>6.89 x 10<sup>9</sup> (53%)</td> <td>2.15 x 10<sup>9</sup> (53%)</td> <td>1.91 x 10<sup>9</sup> (48%)</td> </tr> <tr> <td>Total</td> <td>16.11 x 10<sup>9</sup></td> <td>13.04 x 10<sup>9</sup></td> <td>4.00 x 10<sup>9</sup></td> <td>4.07 x 10<sup>9</sup></td> </tr> </table>                                                                                                                                                                                                                                                                                            | Tracheo-bronchial            | 4.85 x 10 <sup>9</sup> (30%) | 3.91 x 10 <sup>9</sup> (30%) | 1.18 x 10 <sup>9</sup> (30%) | 1.33 x 10 <sup>9</sup> (32%) | Alveolar | 8.39 x 10 <sup>9</sup> (52%) | 6.89 x 10 <sup>9</sup> (53%) | 2.15 x 10 <sup>9</sup> (53%) | 1.91 x 10 <sup>9</sup> (48%) | Total | 16.11 x 10 <sup>9</sup> | 13.04 x 10 <sup>9</sup> | 4.00 x 10 <sup>9</sup> | 4.07 x 10 <sup>9</sup> |
| Tracheo-bronchial          | 4.85 x 10 <sup>9</sup> (30%)                                                                                                                                                                                                                                                                                                                                                                                                                                                                                                                                                                                                                                                                                                                                                                                                                              | 3.91 x 10 <sup>9</sup> (30%) | 1.18 x 10 <sup>9</sup> (30%) | 1.33 x 10 <sup>9</sup> (32%) |                              |                              |          |                              |                              |                              |                              |       |                         |                         |                        |                        |
| Alveolar                   | 8.39 x 10 <sup>9</sup> (52%)                                                                                                                                                                                                                                                                                                                                                                                                                                                                                                                                                                                                                                                                                                                                                                                                                              | 6.89 x 10 <sup>9</sup> (53%) | 2.15 x 10 <sup>9</sup> (53%) | 1.91 x 10 <sup>9</sup> (48%) |                              |                              |          |                              |                              |                              |                              |       |                         |                         |                        |                        |
| Total                      | 16.11 x 10 <sup>9</sup>                                                                                                                                                                                                                                                                                                                                                                                                                                                                                                                                                                                                                                                                                                                                                                                                                                   | 13.04 x 10 <sup>9</sup>      | 4.00 x 10 <sup>9</sup>       | 4.07 x 10 <sup>9</sup>       |                              |                              |          |                              |                              |                              |                              |       |                         |                         |                        |                        |
|                            | <ul style="list-style-type: none"> <li>• During smoking, submicronic particles released by traditional and hand-rolled cigarettes and deposited in the respiratory tract of a passively exposed subject are four-times higher than those released by e-cigarettes and HnB devices</li> <li>• After smoking, submicronic particles generated by traditional and hand-rolled cigarettes remain high until the end of the experiment (about six-times higher than background) while, for e-cigarettes and HnB devices, submicronic particles' values return immediately to similar to background levels</li> </ul>                                                                                                                                                                                                                                           |                              |                              |                              |                              |                              |          |                              |                              |                              |                              |       |                         |                         |                        |                        |
| <b>Conclusions</b>         | <ul style="list-style-type: none"> <li>• Exposure to submicronic particles generated by e-cigarette and HnB devices occurs during use period and becomes negligible when the devices are turned off</li> <li>• Exposure to submicronic particles when e-cigarette and HnB are used still occur and can be inhaled and reach alveolar region of a passive smoker</li> </ul>                                                                                                                                                                                                                                                                                                                                                                                                                                                                                |                              |                              |                              |                              |                              |          |                              |                              |                              |                              |       |                         |                         |                        |                        |
| <b>Authors, study year</b> | <b>Ruprecht et al., 2017 [20]</b>                                                                                                                                                                                                                                                                                                                                                                                                                                                                                                                                                                                                                                                                                                                                                                                                                         |                              |                              |                              |                              |                              |          |                              |                              |                              |                              |       |                         |                         |                        |                        |
| <b>Funder/Affiliations</b> | <p><b>Funded by:</b> Fondazione IRCCS, Istituto Nazionale dei Tumori, Milan, Italy and by the University of Southern California</p> <p><b>Affiliations:</b></p> <ul style="list-style-type: none"> <li>• Fondazione IRCCS Istituto Tumori, Milan, Italy;</li> <li>• Department of Civil and Environmental Engineering, University of Southern California, California, USA;</li> <li>• Cardiopulmonary Rehabilitation Unit, Azienda Sociosanitaria Territoriale Lariana, Sant'Antonio Abate Hospital, Cantu, Italy;</li> <li>• Aerosol and Air Pollution Research Group, School of Energy and Environment, City University of Hong Kong, Hong Kong;</li> <li>• Environmental Chemistry and Technology Program, University of Wisconsin-Madison, Madison, Wisconsin, USA;</li> <li>• Repace Associates Inc., Bowie, Maryland, USA</li> </ul>                |                              |                              |                              |                              |                              |          |                              |                              |                              |                              |       |                         |                         |                        |                        |
| <b>Primary aim</b>         | To compare levels of secondhand emissions by IQOS, e-cigarette, and cigarette in an indoor environment                                                                                                                                                                                                                                                                                                                                                                                                                                                                                                                                                                                                                                                                                                                                                    |                              |                              |                              |                              |                              |          |                              |                              |                              |                              |       |                         |                         |                        |                        |
| <b>Products used</b>       | <ul style="list-style-type: none"> <li>• IQOS</li> <li>• Tank-style e-cigarettes: "Elips Serie C," Tank System (Ovale Europe Srl), refilled with 16 mg/ml nicotine cartridges</li> <li>• Cigarettes</li> </ul>                                                                                                                                                                                                                                                                                                                                                                                                                                                                                                                                                                                                                                            |                              |                              |                              |                              |                              |          |                              |                              |                              |                              |       |                         |                         |                        |                        |
| <b>Methods</b>             | <p><b>Design:</b> Laboratory comparison study using smoking volunteers</p> <p><b>Study time and setting:</b> not reported</p> <p><b>Measures:</b> Black Carbon (BC) was measured at two wavelengths (880 nm and 370 nm), using an Aethalometer (model AE31, Magee Scientific) and reported in ng/m<sup>3</sup>. Particulate matter number concentration was monitored using a Met One Instruments particle counter operating with two channels (dp &gt; 1.0 mm and dp &gt; 0.3 mm). Additionally, submicron particles (10–1000 nm in size) were measured using a condensation particle counter (CPC model 3007, TSI Inc., Shoreview, MN, USA). Particle mass (PM) concentration (in mg/m<sup>3</sup>) was measured at three size ranges, namely PM<sub>1</sub>, PM<sub>2.5</sub>, and PM<sub>10</sub>, using a Met One PM mass monitor (model Aerocet</p> |                              |                              |                              |                              |                              |          |                              |                              |                              |                              |       |                         |                         |                        |                        |

|                                               | <p>531). The instrument was gravimetrically pre-calibrated by parallel comparison with the model BAM-1020 (Met One Instruments Inc.) with US Environmental Protection Agency (EPA) equivalence certificate designation N.° EQPM-0798-122.</p> <p>Trace elements, metals, and particle-phase organic compounds were measured by time-integrated collections of PM samples, followed by offline extraction and chemical analysis. Total Suspended Particles were collected on quartz and Teflon filters (2 mm pore size, Whatman International Ltd., Midlestone, UK) loaded on four Sioutas Personal Cascade Impactor Samplers (Sioutas™ PCIS, SKC Inc., Eighty Four, PA, USA) each operating at 10 l/min, outdoors and indoors. To measure the metals and trace element concentrations, Teflon filters were digested in an acid mixture (comprised of nitric acid, hydrochloric acid, and hydrogen peroxide), inside of a microwave-assisted Teflon-made digestion bomb (Milestone ETHOSC+), and subsequently analysed using a high-resolution magnetic sector inductively coupled plasma mass spectrometry (ICP-MS; Thermo-Finnigan Element 2). To measure the concentration of individual organic species (including but not limited to alkanes, polycyclic aromatic hydrocarbons, and organic acids), quartz filters were extracted in a 1: 1 solution of dichloromethane and acetone, using Soxhlets, followed by volume reduction using rotary evaporation under high purity nitrogen and derivatization of carboxylic acids with diazomethane. The substrates were then analysed by gas chromatography mass spectrometry (GC-MS) method (GC-6980, quadruple MS-5973, Agilent Technologies). In addition to the particle phase measurements, gas-phase aldehydes were also collected on silica vials activated with 2,4-Dinitrophenylhydrazine (DNPH) and analysed according to the EPA method TO-11A -1999 (method TO-11A; US-EPA 1999).</p> |                                                       |                                                               |                                                       |                                   |                       |           |                                         |                       |                       |                                       |                       |         |                                       |                       |                       |                                               |         |       |                           |                       |          |                             |                       |         |
|-----------------------------------------------|---------------------------------------------------------------------------------------------------------------------------------------------------------------------------------------------------------------------------------------------------------------------------------------------------------------------------------------------------------------------------------------------------------------------------------------------------------------------------------------------------------------------------------------------------------------------------------------------------------------------------------------------------------------------------------------------------------------------------------------------------------------------------------------------------------------------------------------------------------------------------------------------------------------------------------------------------------------------------------------------------------------------------------------------------------------------------------------------------------------------------------------------------------------------------------------------------------------------------------------------------------------------------------------------------------------------------------------------------------------------------------------------------------------------------------------------------------------------------------------------------------------------------------------------------------------------------------------------------------------------------------------------------------------------------------------------------------------------------------------------------------------------------------------------------------------------------------------------------------------------------------------------------------------------------------------------------|-------------------------------------------------------|---------------------------------------------------------------|-------------------------------------------------------|-----------------------------------|-----------------------|-----------|-----------------------------------------|-----------------------|-----------------------|---------------------------------------|-----------------------|---------|---------------------------------------|-----------------------|-----------------------|-----------------------------------------------|---------|-------|---------------------------|-----------------------|----------|-----------------------------|-----------------------|---------|
| <b>Participants</b>                           | Not reported                                                                                                                                                                                                                                                                                                                                                                                                                                                                                                                                                                                                                                                                                                                                                                                                                                                                                                                                                                                                                                                                                                                                                                                                                                                                                                                                                                                                                                                                                                                                                                                                                                                                                                                                                                                                                                                                                                                                      |                                                       |                                                               |                                                       |                                   |                       |           |                                         |                       |                       |                                       |                       |         |                                       |                       |                       |                                               |         |       |                           |                       |          |                             |                       |         |
| <b>Interventions/Exposure</b>                 | <p>Air samples were collected at the sitting room of a flat owned by habitual smokers (volume: 48 m<sup>3</sup>. 1.5 air changes/h), furnished with typical home appliances. During the experiments, the room was normally occupied by two to three people and equipped with real time analysers (placed 2 meters away from the smokers), samplers and three fans were always in operation during the smoking sessions and blowing in three different directions, two horizontally and one vertically, to assure homogeneity in the sampling environment and maximal mixing.</p> <p>For IQOS, a total of 10 menthol and 14 regular tobacco sticks were tested; each session lasted for about 3 hours, during which tobacco sticks were consumed in cycles of 7 minutes, followed by 3 minutes pauses.</p> <p>For e-cigarettes, 13 vaping sessions were performed and results reported as the average; e-cigarette vaping session lasted for 2–3 hours, with one puff every minute for 7 minutes, followed by 3 minutes pauses.</p> <p>For cigarettes, nine were smoked in sequence, each for about 7 minutes with 3 minute pauses in between.</p>                                                                                                                                                                                                                                                                                                                                                                                                                                                                                                                                                                                                                                                                                                                                                                                                 |                                                       |                                                               |                                                       |                                   |                       |           |                                         |                       |                       |                                       |                       |         |                                       |                       |                       |                                               |         |       |                           |                       |          |                             |                       |         |
| <b>Outcome/Key findings</b>                   | <p><b>Air pollution after the use of e-cigarette and HnB compared to cigarette secondhand tobacco smoke</b></p> <table border="1"> <thead> <tr> <th>Pollutant</th> <th>E-cigarette pollution as % of cigarette pollution (min%–max%)</th> <th>HnB pollution as % of cigarette pollution (min%–max%)</th> </tr> </thead> <tbody> <tr> <td>370 nm UV BC (µg/m<sup>3</sup>)</td> <td>non-detectable levels</td> <td>0.73–0.79</td> </tr> <tr> <td>880 nm Standard BC (µg/m<sup>3</sup>)</td> <td>non-detectable levels</td> <td>non-detectable levels</td> </tr> <tr> <td>PM &gt; 0.3 (particles/cm<sup>3</sup>)</td> <td>non-detectable levels</td> <td>2.8–7.3</td> </tr> <tr> <td>PM &gt; 1.0 (particles/cm<sup>3</sup>)</td> <td>non-detectable levels</td> <td>non-detectable levels</td> </tr> <tr> <td>PM<sub>nm</sub> (particles/cm<sup>3</sup>)</td> <td>5.7–7.0</td> <td>22–24</td> </tr> <tr> <td>PM 1 (µg/m<sup>3</sup>)</td> <td>non-detectable levels</td> <td>0.92–1.0</td> </tr> <tr> <td>PM 2.5 (µg/m<sup>3</sup>)</td> <td>non-detectable levels</td> <td>1.3–1.5</td> </tr> </tbody> </table>                                                                                                                                                                                                                                                                                                                                                                                                                                                                                                                                                                                                                                                                                                                                                                                                                                     | Pollutant                                             | E-cigarette pollution as % of cigarette pollution (min%–max%) | HnB pollution as % of cigarette pollution (min%–max%) | 370 nm UV BC (µg/m <sup>3</sup> ) | non-detectable levels | 0.73–0.79 | 880 nm Standard BC (µg/m <sup>3</sup> ) | non-detectable levels | non-detectable levels | PM > 0.3 (particles/cm <sup>3</sup> ) | non-detectable levels | 2.8–7.3 | PM > 1.0 (particles/cm <sup>3</sup> ) | non-detectable levels | non-detectable levels | PM <sub>nm</sub> (particles/cm <sup>3</sup> ) | 5.7–7.0 | 22–24 | PM 1 (µg/m <sup>3</sup> ) | non-detectable levels | 0.92–1.0 | PM 2.5 (µg/m <sup>3</sup> ) | non-detectable levels | 1.3–1.5 |
| Pollutant                                     | E-cigarette pollution as % of cigarette pollution (min%–max%)                                                                                                                                                                                                                                                                                                                                                                                                                                                                                                                                                                                                                                                                                                                                                                                                                                                                                                                                                                                                                                                                                                                                                                                                                                                                                                                                                                                                                                                                                                                                                                                                                                                                                                                                                                                                                                                                                     | HnB pollution as % of cigarette pollution (min%–max%) |                                                               |                                                       |                                   |                       |           |                                         |                       |                       |                                       |                       |         |                                       |                       |                       |                                               |         |       |                           |                       |          |                             |                       |         |
| 370 nm UV BC (µg/m <sup>3</sup> )             | non-detectable levels                                                                                                                                                                                                                                                                                                                                                                                                                                                                                                                                                                                                                                                                                                                                                                                                                                                                                                                                                                                                                                                                                                                                                                                                                                                                                                                                                                                                                                                                                                                                                                                                                                                                                                                                                                                                                                                                                                                             | 0.73–0.79                                             |                                                               |                                                       |                                   |                       |           |                                         |                       |                       |                                       |                       |         |                                       |                       |                       |                                               |         |       |                           |                       |          |                             |                       |         |
| 880 nm Standard BC (µg/m <sup>3</sup> )       | non-detectable levels                                                                                                                                                                                                                                                                                                                                                                                                                                                                                                                                                                                                                                                                                                                                                                                                                                                                                                                                                                                                                                                                                                                                                                                                                                                                                                                                                                                                                                                                                                                                                                                                                                                                                                                                                                                                                                                                                                                             | non-detectable levels                                 |                                                               |                                                       |                                   |                       |           |                                         |                       |                       |                                       |                       |         |                                       |                       |                       |                                               |         |       |                           |                       |          |                             |                       |         |
| PM > 0.3 (particles/cm <sup>3</sup> )         | non-detectable levels                                                                                                                                                                                                                                                                                                                                                                                                                                                                                                                                                                                                                                                                                                                                                                                                                                                                                                                                                                                                                                                                                                                                                                                                                                                                                                                                                                                                                                                                                                                                                                                                                                                                                                                                                                                                                                                                                                                             | 2.8–7.3                                               |                                                               |                                                       |                                   |                       |           |                                         |                       |                       |                                       |                       |         |                                       |                       |                       |                                               |         |       |                           |                       |          |                             |                       |         |
| PM > 1.0 (particles/cm <sup>3</sup> )         | non-detectable levels                                                                                                                                                                                                                                                                                                                                                                                                                                                                                                                                                                                                                                                                                                                                                                                                                                                                                                                                                                                                                                                                                                                                                                                                                                                                                                                                                                                                                                                                                                                                                                                                                                                                                                                                                                                                                                                                                                                             | non-detectable levels                                 |                                                               |                                                       |                                   |                       |           |                                         |                       |                       |                                       |                       |         |                                       |                       |                       |                                               |         |       |                           |                       |          |                             |                       |         |
| PM <sub>nm</sub> (particles/cm <sup>3</sup> ) | 5.7–7.0                                                                                                                                                                                                                                                                                                                                                                                                                                                                                                                                                                                                                                                                                                                                                                                                                                                                                                                                                                                                                                                                                                                                                                                                                                                                                                                                                                                                                                                                                                                                                                                                                                                                                                                                                                                                                                                                                                                                           | 22–24                                                 |                                                               |                                                       |                                   |                       |           |                                         |                       |                       |                                       |                       |         |                                       |                       |                       |                                               |         |       |                           |                       |          |                             |                       |         |
| PM 1 (µg/m <sup>3</sup> )                     | non-detectable levels                                                                                                                                                                                                                                                                                                                                                                                                                                                                                                                                                                                                                                                                                                                                                                                                                                                                                                                                                                                                                                                                                                                                                                                                                                                                                                                                                                                                                                                                                                                                                                                                                                                                                                                                                                                                                                                                                                                             | 0.92–1.0                                              |                                                               |                                                       |                                   |                       |           |                                         |                       |                       |                                       |                       |         |                                       |                       |                       |                                               |         |       |                           |                       |          |                             |                       |         |
| PM 2.5 (µg/m <sup>3</sup> )                   | non-detectable levels                                                                                                                                                                                                                                                                                                                                                                                                                                                                                                                                                                                                                                                                                                                                                                                                                                                                                                                                                                                                                                                                                                                                                                                                                                                                                                                                                                                                                                                                                                                                                                                                                                                                                                                                                                                                                                                                                                                             | 1.3–1.5                                               |                                                               |                                                       |                                   |                       |           |                                         |                       |                       |                                       |                       |         |                                       |                       |                       |                                               |         |       |                           |                       |          |                             |                       |         |

|                            |                                                                                                                                                                                                                                                                                                                                                                                                                                                                                                                                                                                                                                                                                                                                                                                                                                                                                                                                                                                                                                                                                                                                                                                                                                                                                                                                                                                                                                                                                                                                                                                                                                                                                                                                                                                                                                                                                                                                                                                                                                                                                                                                                                                                                                                                                                                                                                                                                                                                                                                                                                                                                                                                                                                                                                       |                       |         |
|----------------------------|-----------------------------------------------------------------------------------------------------------------------------------------------------------------------------------------------------------------------------------------------------------------------------------------------------------------------------------------------------------------------------------------------------------------------------------------------------------------------------------------------------------------------------------------------------------------------------------------------------------------------------------------------------------------------------------------------------------------------------------------------------------------------------------------------------------------------------------------------------------------------------------------------------------------------------------------------------------------------------------------------------------------------------------------------------------------------------------------------------------------------------------------------------------------------------------------------------------------------------------------------------------------------------------------------------------------------------------------------------------------------------------------------------------------------------------------------------------------------------------------------------------------------------------------------------------------------------------------------------------------------------------------------------------------------------------------------------------------------------------------------------------------------------------------------------------------------------------------------------------------------------------------------------------------------------------------------------------------------------------------------------------------------------------------------------------------------------------------------------------------------------------------------------------------------------------------------------------------------------------------------------------------------------------------------------------------------------------------------------------------------------------------------------------------------------------------------------------------------------------------------------------------------------------------------------------------------------------------------------------------------------------------------------------------------------------------------------------------------------------------------------------------------|-----------------------|---------|
|                            | PM 10 ( $\mu\text{g}/\text{m}^3$ )                                                                                                                                                                                                                                                                                                                                                                                                                                                                                                                                                                                                                                                                                                                                                                                                                                                                                                                                                                                                                                                                                                                                                                                                                                                                                                                                                                                                                                                                                                                                                                                                                                                                                                                                                                                                                                                                                                                                                                                                                                                                                                                                                                                                                                                                                                                                                                                                                                                                                                                                                                                                                                                                                                                                    | non-detectable levels | 1.5–1.7 |
|                            | Acrolein ( $\mu\text{g}/\text{m}^3$ )                                                                                                                                                                                                                                                                                                                                                                                                                                                                                                                                                                                                                                                                                                                                                                                                                                                                                                                                                                                                                                                                                                                                                                                                                                                                                                                                                                                                                                                                                                                                                                                                                                                                                                                                                                                                                                                                                                                                                                                                                                                                                                                                                                                                                                                                                                                                                                                                                                                                                                                                                                                                                                                                                                                                 | non-detectable levels | 1.8–2.3 |
|                            | Acetaldehyde ( $\mu\text{g}/\text{m}^3$ )                                                                                                                                                                                                                                                                                                                                                                                                                                                                                                                                                                                                                                                                                                                                                                                                                                                                                                                                                                                                                                                                                                                                                                                                                                                                                                                                                                                                                                                                                                                                                                                                                                                                                                                                                                                                                                                                                                                                                                                                                                                                                                                                                                                                                                                                                                                                                                                                                                                                                                                                                                                                                                                                                                                             | 0.23–0.29             | 5.0–5.9 |
|                            | Formaldehyde ( $\mu\text{g}/\text{m}^3$ )                                                                                                                                                                                                                                                                                                                                                                                                                                                                                                                                                                                                                                                                                                                                                                                                                                                                                                                                                                                                                                                                                                                                                                                                                                                                                                                                                                                                                                                                                                                                                                                                                                                                                                                                                                                                                                                                                                                                                                                                                                                                                                                                                                                                                                                                                                                                                                                                                                                                                                                                                                                                                                                                                                                             | 3.1–3.7               | 6.9–7.1 |
| <b>Conclusions</b>         | <ul style="list-style-type: none"> <li>• Particulate matter emissions from IQOS were substantially higher compared to e-cigarette emissions but well below emissions associated with cigarette smoke</li> <li>• Compared to cigarette smoke, IQOS and e-cigarettes emitted much lower levels of widely recognised carcinogens aldehydes, but these still pose risk for other people around.</li> </ul>                                                                                                                                                                                                                                                                                                                                                                                                                                                                                                                                                                                                                                                                                                                                                                                                                                                                                                                                                                                                                                                                                                                                                                                                                                                                                                                                                                                                                                                                                                                                                                                                                                                                                                                                                                                                                                                                                                                                                                                                                                                                                                                                                                                                                                                                                                                                                                |                       |         |
| <b>Authors, study year</b> | <b>Mitova et al., 2016 [21]</b>                                                                                                                                                                                                                                                                                                                                                                                                                                                                                                                                                                                                                                                                                                                                                                                                                                                                                                                                                                                                                                                                                                                                                                                                                                                                                                                                                                                                                                                                                                                                                                                                                                                                                                                                                                                                                                                                                                                                                                                                                                                                                                                                                                                                                                                                                                                                                                                                                                                                                                                                                                                                                                                                                                                                       |                       |         |
| <b>Funder/Affiliations</b> | <b>Affiliations:</b> Philip Morris International R&D, Philip Morris Products S.A., Quai Jeanrenaud 5, 2000 Neuchatel, Switzerland                                                                                                                                                                                                                                                                                                                                                                                                                                                                                                                                                                                                                                                                                                                                                                                                                                                                                                                                                                                                                                                                                                                                                                                                                                                                                                                                                                                                                                                                                                                                                                                                                                                                                                                                                                                                                                                                                                                                                                                                                                                                                                                                                                                                                                                                                                                                                                                                                                                                                                                                                                                                                                     |                       |         |
| <b>Primary aim</b>         | To compare levels of secondhand emissions by IQOS and cigarette in an indoor environment                                                                                                                                                                                                                                                                                                                                                                                                                                                                                                                                                                                                                                                                                                                                                                                                                                                                                                                                                                                                                                                                                                                                                                                                                                                                                                                                                                                                                                                                                                                                                                                                                                                                                                                                                                                                                                                                                                                                                                                                                                                                                                                                                                                                                                                                                                                                                                                                                                                                                                                                                                                                                                                                              |                       |         |
| <b>Products used</b>       | <ul style="list-style-type: none"> <li>• IQOS: under Health Canada Intense (HCI) conditions yields 1.32 mg of nicotine and 0.53 mg of CO.</li> <li>• Cigarette (Marlboro Gold from Swiss market): under HCI yields 1.7 mg nicotine and 22.9 mg CO.</li> </ul>                                                                                                                                                                                                                                                                                                                                                                                                                                                                                                                                                                                                                                                                                                                                                                                                                                                                                                                                                                                                                                                                                                                                                                                                                                                                                                                                                                                                                                                                                                                                                                                                                                                                                                                                                                                                                                                                                                                                                                                                                                                                                                                                                                                                                                                                                                                                                                                                                                                                                                         |                       |         |
| <b>Methods</b>             | <p><b>Design:</b> Laboratory comparison study using smoking volunteers.</p> <p><b>Study time and setting:</b> Switzerland, time not reported</p> <p><b>Measures:</b> Particulate phase markers for environmental tobacco smoker (ETS) were determined according to ISO methods: ISO 15593 for gravimetric respirable suspended particulate matter (RSP), ultraviolet particulate matter (UVPM) and fluorescent particulate matter (FPM), and ISO 18144 for solanesol. Briefly, RSP was determined by weighing a polytetrafluoroethylene filter (37 mm diameter, 1 <math>\mu\text{m}</math> pore size) in triplicate on a microbalance (XP2U, Mettler Toledo, Greifensee, Switzerland) after overnight conditioning at 50 <math>\pm</math>5% humidity. The average of the triplicate determinations was taken as the filter weight. After air sampling, the procedure was repeated, and the mass increase was reported as RSP. UVPM, FPM and solanesol were determined after extraction of the filter with 3mL methanol for background and IQOS assessments and 6 mL for assessments using Marlboro Gold. UVPM and FPM were determined simultaneously using ultra performance liquid chromatography (UPLC) with ultraviolet (UV) and fluorescence detection (Acquity, Waters Corporation, Milford, Massachusetts, USA). UVPM was determined at a wave length of 325 nm, and FPM at 300 nm excitation and 420 nm emission wavelengths. 2,2',4,4'-Tetrahydroxybenzophenone and scopoletin were used as surrogate standards for UVPM and FPM, respectively. The determination of solanesol was performed using UPLC with UV detection at a wavelength of 205 nm (Acquity, Waters Corporation, Milford, Massachusetts, USA). 3-Ethenylpyridine and nicotine were determined using an adaption of the standard method ISO 18145 for use with gas chromatography-mass spectrometry (GC-MS; QP 2010 Ultra, Shimadzu Corporation, Kyoto, Japan). The analysis of VOCs (1,3-butadiene, acrylonitrile, benzene, isoprene, toluene) was performed using a method based on the National Institute for Occupational Safety and Health (NIOSH) standards 1024 and 1501 adapted for the inclusion of acrylonitrile and isoprene (which were not previously determined in the standard methods) in a single method. The air was sampled through a charcoal sorbent tube (Anasorb CSC, SKC, Blandford, UK), which was extracted with dichloromethane (1.5 mL) containing stable isotope-labelled internal standards (acrylonitrile-d3, benzene-d6, 1,3-butadiene-d6, toluene-d8), prior to analysis by GC-MS (QP-2010 Ultra; Shimadzu Corporation, Kyoto, Japan) operated in electron impact ionization (EI) mode. Low molecular weight carbonyl compounds (acetaldehyde, acrolein,</p> |                       |         |

|                                         | crotonaldehyde, formaldehyde) were trapped on a 2,4-dinitrophenylhydrazine (DNPH)-coated silica cartridge (Waters Corporation, Milford, MA, USA) using a method based on ISO standard 16000-3 (International Organization for Standardization, 2011). The cartridge was eluted with acetonitrile (2 mL) and the DNPH-derivatives analysed by liquid chromatography-tandem mass spectrometry using atmospheric pressure chemical ionization (Triple Quad 5500; ABSciex, Framingham, MA, USA). CO was measured continuously using a nondispersive infrared detector (X-Stream™ Process Gas Analyzer, Emerson, Baar, Switzerland) calibrated using a certified gas standard (Carbagas AG, Guemlingen, Switzerland). NO and NOx were measured continuously using a chemiluminescence detector (APNA 370 Ambient NOx Monitor; Horiba, Baden, Switzerland) calibrated with certified gas standards (Messer Schweiz AG, Lenzburg, Switzerland).                                                                                                                                                                                                                                                      |                               |        |                               |                                         |  |  |                                |                          |     |          |                        |    |           |                           |     |                   |                           |     |                                 |                           |     |                                |                           |     |                  |  |  |              |                        |     |
|-----------------------------------------|-----------------------------------------------------------------------------------------------------------------------------------------------------------------------------------------------------------------------------------------------------------------------------------------------------------------------------------------------------------------------------------------------------------------------------------------------------------------------------------------------------------------------------------------------------------------------------------------------------------------------------------------------------------------------------------------------------------------------------------------------------------------------------------------------------------------------------------------------------------------------------------------------------------------------------------------------------------------------------------------------------------------------------------------------------------------------------------------------------------------------------------------------------------------------------------------------|-------------------------------|--------|-------------------------------|-----------------------------------------|--|--|--------------------------------|--------------------------|-----|----------|------------------------|----|-----------|---------------------------|-----|-------------------|---------------------------|-----|---------------------------------|---------------------------|-----|--------------------------------|---------------------------|-----|------------------|--|--|--------------|------------------------|-----|
| <b>Participants</b>                     | Adult cigarette smokers (age: 21–60 years) with a regular daily cigarette consumption of at least 10 cigarettes with a 6mg ISO tar yield were recruited for participation in the study by a consumer panel recruiting agency.<br>A PMI representative was present during all assessments to ensure the panelists use the test products according to the established schedule. The PMI representatives for the background and IQOS assessments were non-smokers, while those for the Marlboro Gold assessments were adult smokers of cigarettes. The PMI representatives did not smoke or use any test products during the assessments.                                                                                                                                                                                                                                                                                                                                                                                                                                                                                                                                                        |                               |        |                               |                                         |  |  |                                |                          |     |          |                        |    |           |                           |     |                   |                           |     |                                 |                           |     |                                |                           |     |                  |  |  |              |                        |     |
| <b>Interventions/Exposure</b>           | All assessments (per simulation) lasted for 5 h during which time the smoking panelists used the test products according to a pre-defined time schedule. For instance, for the “Office” simulation, panelist 1 started to use the test product immediately at the beginning of the assessment period (t=0 min) and used a new test product at intervals of 30 min; smoking panelist 2 started to use the test product at t=15 min and used a new test product at intervals of 30 min (total of 4 test products per hour).<br>“Background” measurements of indoor air quality (IAQ) were performed for 4 h using the same ventilation conditions, but no test products were used. After each “background” session, a tracer gas method was used according to the International Organization for Standardization standard method ISO 16000-8 to confirm the ventilation rate in the environmentally controlled room. The room was flooded with carbon dioxide (CO <sub>2</sub> ) up to a concentration of 1% and the decay rate of CO <sub>2</sub> was measured over 8 h using a non-dispersive infrared instrument (X-Stream™ Process Gas Analyzer, Emerson Electric Co., St. Louis, MO, USA). |                               |        |                               |                                         |  |  |                                |                          |     |          |                        |    |           |                           |     |                   |                           |     |                                 |                           |     |                                |                           |     |                  |  |  |              |                        |     |
| <b>Outcome/Key findings</b>             | <p><b>Air constituents after using IQOS in ‘Residential’ (1.5 air changes per hour)* condition</b></p> <table border="1"> <thead> <tr> <th>Constituent in the air</th> <th>Median</th> <th>% compared to cigarette smoke</th> </tr> </thead> <tbody> <tr> <td colspan="3"><b>Secondhand tobacco smoke markers</b></td> </tr> <tr> <td>Respirable suspended particles</td> <td>&lt; 14.7 µg/m<sup>3</sup></td> <td>&lt;6%</td> </tr> <tr> <td>Nicotine</td> <td>2.66 µg/m<sup>3</sup></td> <td>9%</td> </tr> <tr> <td>Solanesol</td> <td>&lt; 0.466 µg/m<sup>3</sup></td> <td>&lt;5%</td> </tr> <tr> <td>3-Ethenylpyridine</td> <td>&lt; 0.243 µg/m<sup>3</sup></td> <td>&lt;3%</td> </tr> <tr> <td>Ultra-violet particulate matter</td> <td>&lt; 0.789 µg/m<sup>3</sup></td> <td>&lt;2%</td> </tr> <tr> <td>Fluorescent particulate matter</td> <td>&lt; 0.064 µg/m<sup>3</sup></td> <td>&lt;1%</td> </tr> <tr> <td colspan="3"><b>Carbonyls</b></td> </tr> <tr> <td>Formaldehyde</td> <td>22.4 µg/m<sup>3</sup></td> <td>41%</td> </tr> </tbody> </table>                                                                                                                                    | Constituent in the air        | Median | % compared to cigarette smoke | <b>Secondhand tobacco smoke markers</b> |  |  | Respirable suspended particles | < 14.7 µg/m <sup>3</sup> | <6% | Nicotine | 2.66 µg/m <sup>3</sup> | 9% | Solanesol | < 0.466 µg/m <sup>3</sup> | <5% | 3-Ethenylpyridine | < 0.243 µg/m <sup>3</sup> | <3% | Ultra-violet particulate matter | < 0.789 µg/m <sup>3</sup> | <2% | Fluorescent particulate matter | < 0.064 µg/m <sup>3</sup> | <1% | <b>Carbonyls</b> |  |  | Formaldehyde | 22.4 µg/m <sup>3</sup> | 41% |
| Constituent in the air                  | Median                                                                                                                                                                                                                                                                                                                                                                                                                                                                                                                                                                                                                                                                                                                                                                                                                                                                                                                                                                                                                                                                                                                                                                                        | % compared to cigarette smoke |        |                               |                                         |  |  |                                |                          |     |          |                        |    |           |                           |     |                   |                           |     |                                 |                           |     |                                |                           |     |                  |  |  |              |                        |     |
| <b>Secondhand tobacco smoke markers</b> |                                                                                                                                                                                                                                                                                                                                                                                                                                                                                                                                                                                                                                                                                                                                                                                                                                                                                                                                                                                                                                                                                                                                                                                               |                               |        |                               |                                         |  |  |                                |                          |     |          |                        |    |           |                           |     |                   |                           |     |                                 |                           |     |                                |                           |     |                  |  |  |              |                        |     |
| Respirable suspended particles          | < 14.7 µg/m <sup>3</sup>                                                                                                                                                                                                                                                                                                                                                                                                                                                                                                                                                                                                                                                                                                                                                                                                                                                                                                                                                                                                                                                                                                                                                                      | <6%                           |        |                               |                                         |  |  |                                |                          |     |          |                        |    |           |                           |     |                   |                           |     |                                 |                           |     |                                |                           |     |                  |  |  |              |                        |     |
| Nicotine                                | 2.66 µg/m <sup>3</sup>                                                                                                                                                                                                                                                                                                                                                                                                                                                                                                                                                                                                                                                                                                                                                                                                                                                                                                                                                                                                                                                                                                                                                                        | 9%                            |        |                               |                                         |  |  |                                |                          |     |          |                        |    |           |                           |     |                   |                           |     |                                 |                           |     |                                |                           |     |                  |  |  |              |                        |     |
| Solanesol                               | < 0.466 µg/m <sup>3</sup>                                                                                                                                                                                                                                                                                                                                                                                                                                                                                                                                                                                                                                                                                                                                                                                                                                                                                                                                                                                                                                                                                                                                                                     | <5%                           |        |                               |                                         |  |  |                                |                          |     |          |                        |    |           |                           |     |                   |                           |     |                                 |                           |     |                                |                           |     |                  |  |  |              |                        |     |
| 3-Ethenylpyridine                       | < 0.243 µg/m <sup>3</sup>                                                                                                                                                                                                                                                                                                                                                                                                                                                                                                                                                                                                                                                                                                                                                                                                                                                                                                                                                                                                                                                                                                                                                                     | <3%                           |        |                               |                                         |  |  |                                |                          |     |          |                        |    |           |                           |     |                   |                           |     |                                 |                           |     |                                |                           |     |                  |  |  |              |                        |     |
| Ultra-violet particulate matter         | < 0.789 µg/m <sup>3</sup>                                                                                                                                                                                                                                                                                                                                                                                                                                                                                                                                                                                                                                                                                                                                                                                                                                                                                                                                                                                                                                                                                                                                                                     | <2%                           |        |                               |                                         |  |  |                                |                          |     |          |                        |    |           |                           |     |                   |                           |     |                                 |                           |     |                                |                           |     |                  |  |  |              |                        |     |
| Fluorescent particulate matter          | < 0.064 µg/m <sup>3</sup>                                                                                                                                                                                                                                                                                                                                                                                                                                                                                                                                                                                                                                                                                                                                                                                                                                                                                                                                                                                                                                                                                                                                                                     | <1%                           |        |                               |                                         |  |  |                                |                          |     |          |                        |    |           |                           |     |                   |                           |     |                                 |                           |     |                                |                           |     |                  |  |  |              |                        |     |
| <b>Carbonyls</b>                        |                                                                                                                                                                                                                                                                                                                                                                                                                                                                                                                                                                                                                                                                                                                                                                                                                                                                                                                                                                                                                                                                                                                                                                                               |                               |        |                               |                                         |  |  |                                |                          |     |          |                        |    |           |                           |     |                   |                           |     |                                 |                           |     |                                |                           |     |                  |  |  |              |                        |     |
| Formaldehyde                            | 22.4 µg/m <sup>3</sup>                                                                                                                                                                                                                                                                                                                                                                                                                                                                                                                                                                                                                                                                                                                                                                                                                                                                                                                                                                                                                                                                                                                                                                        | 41%                           |        |                               |                                         |  |  |                                |                          |     |          |                        |    |           |                           |     |                   |                           |     |                                 |                           |     |                                |                           |     |                  |  |  |              |                        |     |

|                            |                                                                                                                                                                                                                                                                                                                                                                                                                                                                                                                                                                                                                                                                                                                                                                                                                                                                                                                                           |
|----------------------------|-------------------------------------------------------------------------------------------------------------------------------------------------------------------------------------------------------------------------------------------------------------------------------------------------------------------------------------------------------------------------------------------------------------------------------------------------------------------------------------------------------------------------------------------------------------------------------------------------------------------------------------------------------------------------------------------------------------------------------------------------------------------------------------------------------------------------------------------------------------------------------------------------------------------------------------------|
|                            | <p>Acetaldehyde 12.5 µg/m<sup>3</sup> 14%</p> <p>Crotonaldehyde &lt;0.182 µg/m<sup>3</sup> &lt;9%</p> <p>Acrolein &lt; 0.146 µg/m<sup>3</sup> &lt;3%</p> <p><b>Volatile organic compounds</b></p> <p>Toluene 2.61 µg/m<sup>3</sup> 9%</p> <p>Acrylonitrile &lt; 0.27 µg/m<sup>3</sup> &lt;7%</p> <p>1,3-Butadiene &lt; 1.14 µg/m<sup>3</sup> &lt;7%</p> <p>Isoprene 6.7 µg/m<sup>3</sup> 6%</p> <p>Benzene 0.567 µg/m<sup>3</sup> 6%</p> <p><b>Gases</b></p> <p>Carbon monoxide 0.454 ppm 21%</p> <p>Nitrogen oxides 5.21 ppb 11%</p> <p>Nitrogen oxide 2.58 ppb 7%</p> <p>* Results for simulated 'hospitality' and 'office' conditions were similar</p>                                                                                                                                                                                                                                                                                 |
| <b>Findings overview</b>   | The concentrations of all measured indoor air constituents were higher in the cigarette, compared to the background and IQOS sessions.                                                                                                                                                                                                                                                                                                                                                                                                                                                                                                                                                                                                                                                                                                                                                                                                    |
| <b>Authors, study year</b> | <b>O'Connell et al., 2016 [22]</b>                                                                                                                                                                                                                                                                                                                                                                                                                                                                                                                                                                                                                                                                                                                                                                                                                                                                                                        |
| <b>Funder/Affiliations</b> | <p><b>Affiliations:</b></p> <ul style="list-style-type: none"> <li>Imperial Tobacco Ltd, 121 Winterstoke Road, Bristol, BS3 2LL, UK</li> <li>Reemtsma Cigarettenfabriken GmbH - Imperial Tobacco Group, Albert-Einstein-Ring 7, D-22761, Hamburg, Germany</li> </ul>                                                                                                                                                                                                                                                                                                                                                                                                                                                                                                                                                                                                                                                                      |
| <b>Primary aim</b>         | To compare levels of sidestream emissions by IQOS, e-cigarette, and nicotine inhalator                                                                                                                                                                                                                                                                                                                                                                                                                                                                                                                                                                                                                                                                                                                                                                                                                                                    |
| <b>Products used</b>       | <ul style="list-style-type: none"> <li>IQOS with regular tobacco sticks</li> <li>Nicorette® inhalator (15 mg nicotine replacement aid; McNeil Consumer Healthcare Ltd)</li> <li>Blu™ closed system e-cigarette (18 mg nicotine; Fontem Ventures B.V.)</li> </ul>                                                                                                                                                                                                                                                                                                                                                                                                                                                                                                                                                                                                                                                                          |
| <b>Methods</b>             | <p><b>Design:</b> Laboratory comparison study using smoking volunteers</p> <p><b>Study time and setting:</b> Switzerland, time not reported</p> <p><b>Method description:</b> Proton Transfer Reaction-Mass Spectrometry (PTR-MS) instrument ionizes volatile organic compounds (VOC) in the gas phase through their reaction with H<sub>3</sub>O<sup>+</sup> to form protonated VOCs (VOCH+) which can then be detected by a mass spectrometer. Airspace analysis was conducted by connecting the PTR-MS inlet to the test chamber and sampling directly. PTR-MS operating conditions were as follows: drift tube voltage, 500 V; drift tube pressure, 2.3 mbar; drift tube temperature, 120°C; drift tube length, 9.3 cm; E/N ratio, 130 Td (Townsend; where E is electric field and N is the number density of the gas in the drift tube; 1 Td=10<sup>-17</sup> cm<sup>2</sup> V molecule<sup>-1</sup>); inlet temperature, 120°C.</p> |
| <b>Participants</b>        | Not reported                                                                                                                                                                                                                                                                                                                                                                                                                                                                                                                                                                                                                                                                                                                                                                                                                                                                                                                              |

|                               |                                                                                                                                                                                                                                                                                                                                                                                                                                                                                                                                                            |
|-------------------------------|------------------------------------------------------------------------------------------------------------------------------------------------------------------------------------------------------------------------------------------------------------------------------------------------------------------------------------------------------------------------------------------------------------------------------------------------------------------------------------------------------------------------------------------------------------|
| <b>Interventions/Exposure</b> | All products were used in accordance with manufacturer's instructions and consumed ad libitum i.e., there was no pre-defined consumption requirement. For each of the different products, a number of replicate puffs were made and representative data from a single puff were shown.                                                                                                                                                                                                                                                                     |
| <b>Outcome/Key findings</b>   | <p><b>Authors' described results</b></p> <ul style="list-style-type: none"> <li>• When IQOS was activated but not puffed, a large number of different volatile organic compounds species across a range of masses were released into the airspace</li> <li>• Volatile organic compounds in the airspace around the nicotine inhalator and the e-cigarette during product use were virtually indistinguishable</li> </ul>                                                                                                                                   |
| <b>Authors' conclusions</b>   | <ul style="list-style-type: none"> <li>• IQOS produce sidestream emissions both while activated and used by a user, which raises a concern of second-hand exposure</li> </ul>                                                                                                                                                                                                                                                                                                                                                                              |
| <b>Authors, study year</b>    | <b>Bekki et al., 2017 [16]</b>                                                                                                                                                                                                                                                                                                                                                                                                                                                                                                                             |
| <b>Funder/Affiliations</b>    | <p><b>Funded by:</b></p> <ul style="list-style-type: none"> <li>• The Health and Labour Science Research Grants from Ministry of Health</li> <li>• Labour and Welfare of the Japanese Government</li> <li>• The practical research project for life-style related diseases including cardiovascular diseases and diabetes mellitus from Japan Agency for Medical Research and Development, AMED.</li> </ul> <p><b>Affiliations:</b> Department of Environmental Health, National Institute of Public Health. Minami, Wako-shi, Saitama 351-0197, Japan</p> |
| <b>Primary aim</b>            | To compare levels of nicotine and HPHC in mainstream IQOS emissions from regular and menthol tobacco sticks with those in mainstream cigarette smoke                                                                                                                                                                                                                                                                                                                                                                                                       |
| <b>Products used</b>          | <ul style="list-style-type: none"> <li>• Reference cigarettes 3R4F (high yield) and 1R5F (low yield)</li> <li>• Regular and menthol IQOS</li> </ul>                                                                                                                                                                                                                                                                                                                                                                                                        |
| <b>Methods</b>                | <p><b>Design:</b> Laboratory comparison study using smoking machines</p> <p><b>Study time and setting:</b> Japan, time not reported</p> <p><b>Measures:</b> yields of HPHC in mainstream aerosol from the regular and menthol IQOS tobacco sticks are compared to HPHC in mainstream smoke from the reference cigarettes</p>                                                                                                                                                                                                                               |
| <b>Participants</b>           | Not reported                                                                                                                                                                                                                                                                                                                                                                                                                                                                                                                                               |
| <b>Interventions/Exposure</b> | Both IQOS and the reference cigarettes were smoked under HCl conditions. Each sampling was performed by 3 cigarettes and tobacco sticks, one cigarette was puffed 9 times, and one tobacco stick was puffed 11 times                                                                                                                                                                                                                                                                                                                                       |
| <b>Outcome/Key findings</b>   | <ul style="list-style-type: none"> <li>• The average concentration of nicotine in IQOS regular tobacco sticks was 15.7 mg/g and in menthol tobacco sticks 17.1 mg/g.</li> </ul>                                                                                                                                                                                                                                                                                                                                                                            |

|                                      | <p>These estimates were similar to nicotine in smoke from reference cigarettes: 19.7 mg/g in 3R4F and 15.9 mg/g in 1R5F.</p> <ul style="list-style-type: none"> <li>• IQOS showed higher nicotine transfer rate from tobacco sticks to aerosol than reference cigarettes: 23.4% (regular) and 23.5% (menthol) compared with 11.3% (3R4F) and 11.5% (1R5F).</li> <li>• The concentration of tobacco specific nitrosamines were almost at the same ratio in IQOS tobacco sticks and in reference cigarettes.</li> </ul> <p><b>Yields of HPHC in the mainstream aerosol of regular and menthol IQOS tobacco sticks and in mainstream smoke of reference cigarettes</b></p> <table border="1"> <thead> <tr> <th></th> <th>IQOS regular</th> <th>IQOS menthol</th> <th>3R4F cigarette</th> <th>1R5F cigarette</th> </tr> <tr> <th>HPHC</th> <th>Mean ± SD</th> <th>Mean ± SD</th> <th>Mean ± SD</th> <th>Mean ± SD</th> </tr> </thead> <tbody> <tr> <td>Total particulate matter (mg/stick)</td> <td>44.0 ± 11.4</td> <td>49.9 ± 8.6</td> <td>36.9 ± 1.9</td> <td>28.9 ± 2.3</td> </tr> <tr> <td>Water (mg/stick)</td> <td>33.1 ± 10.2</td> <td>35.3 ± 8.3</td> <td>10.1 ± 0.9</td> <td>8.8 ± 1.1</td> </tr> <tr> <td>Tar (mg/stick)</td> <td>9.8 ± 3.0</td> <td>13.4 ± 2.2</td> <td>25.2 ± 1.5</td> <td>19.2 ± 1.3</td> </tr> <tr> <td>Nicotine (mg/stick)</td> <td>1.1 ± 0.1</td> <td>1.2 ± 0.1</td> <td>1.7 ± 0.1</td> <td>1.0 ± 0.1</td> </tr> <tr> <td>Carbon monoxide (mg/stick)</td> <td>0.44 ± 0.04</td> <td>0.43 ± 0.04</td> <td>33.0 ± 1.8</td> <td>29.7 ± 1.7</td> </tr> <tr> <td colspan="5"><b>Tobacco-specific nitrosamines</b></td> </tr> <tr> <td>NAB (ng/stick)</td> <td>4.5 ± 0.5</td> <td>5.5 ± 0.6</td> <td>30.4 ± 2.0</td> <td>26.2 ± 0.5</td> </tr> <tr> <td>NAT (ng/stick)</td> <td>34.0 ± 3.1</td> <td>37.2 ± 3.9</td> <td>246.4 ± 16.9</td> <td>183.1 ± 6.0</td> </tr> <tr> <td>NNN (ng/stick)</td> <td>19.2 ± 2.1</td> <td>24.9 ± 3.5</td> <td>311.1 ± 24.3</td> <td>240.7 ± 6.6</td> </tr> <tr> <td>NNK (ng/stick)</td> <td>12.3 ± 1.5</td> <td>13.8 ± 2.6</td> <td>250.4 ± 13.7</td> <td>107.0 ± 5.0</td> </tr> <tr> <td>Total (ng/stick)</td> <td>70.0 ± 7.2</td> <td>81.4 ± 10.4</td> <td>838.2 ± 53.7</td> <td>557.1 ± 15.7</td> </tr> </tbody> </table> |              | IQOS regular   | IQOS menthol   | 3R4F cigarette | 1R5F cigarette | HPHC | Mean ± SD | Mean ± SD | Mean ± SD | Mean ± SD | Total particulate matter (mg/stick) | 44.0 ± 11.4 | 49.9 ± 8.6 | 36.9 ± 1.9 | 28.9 ± 2.3 | Water (mg/stick) | 33.1 ± 10.2 | 35.3 ± 8.3 | 10.1 ± 0.9 | 8.8 ± 1.1 | Tar (mg/stick) | 9.8 ± 3.0 | 13.4 ± 2.2 | 25.2 ± 1.5 | 19.2 ± 1.3 | Nicotine (mg/stick) | 1.1 ± 0.1 | 1.2 ± 0.1 | 1.7 ± 0.1 | 1.0 ± 0.1 | Carbon monoxide (mg/stick) | 0.44 ± 0.04 | 0.43 ± 0.04 | 33.0 ± 1.8 | 29.7 ± 1.7 | <b>Tobacco-specific nitrosamines</b> |  |  |  |  | NAB (ng/stick) | 4.5 ± 0.5 | 5.5 ± 0.6 | 30.4 ± 2.0 | 26.2 ± 0.5 | NAT (ng/stick) | 34.0 ± 3.1 | 37.2 ± 3.9 | 246.4 ± 16.9 | 183.1 ± 6.0 | NNN (ng/stick) | 19.2 ± 2.1 | 24.9 ± 3.5 | 311.1 ± 24.3 | 240.7 ± 6.6 | NNK (ng/stick) | 12.3 ± 1.5 | 13.8 ± 2.6 | 250.4 ± 13.7 | 107.0 ± 5.0 | Total (ng/stick) | 70.0 ± 7.2 | 81.4 ± 10.4 | 838.2 ± 53.7 | 557.1 ± 15.7 |
|--------------------------------------|------------------------------------------------------------------------------------------------------------------------------------------------------------------------------------------------------------------------------------------------------------------------------------------------------------------------------------------------------------------------------------------------------------------------------------------------------------------------------------------------------------------------------------------------------------------------------------------------------------------------------------------------------------------------------------------------------------------------------------------------------------------------------------------------------------------------------------------------------------------------------------------------------------------------------------------------------------------------------------------------------------------------------------------------------------------------------------------------------------------------------------------------------------------------------------------------------------------------------------------------------------------------------------------------------------------------------------------------------------------------------------------------------------------------------------------------------------------------------------------------------------------------------------------------------------------------------------------------------------------------------------------------------------------------------------------------------------------------------------------------------------------------------------------------------------------------------------------------------------------------------------------------------------------------------------------------------------------------------------------------------------------------------------------------------------------------------------------------------------------------------------------------------------------------------------------------------------------------------------------------------------------------------------|--------------|----------------|----------------|----------------|----------------|------|-----------|-----------|-----------|-----------|-------------------------------------|-------------|------------|------------|------------|------------------|-------------|------------|------------|-----------|----------------|-----------|------------|------------|------------|---------------------|-----------|-----------|-----------|-----------|----------------------------|-------------|-------------|------------|------------|--------------------------------------|--|--|--|--|----------------|-----------|-----------|------------|------------|----------------|------------|------------|--------------|-------------|----------------|------------|------------|--------------|-------------|----------------|------------|------------|--------------|-------------|------------------|------------|-------------|--------------|--------------|
|                                      | IQOS regular                                                                                                                                                                                                                                                                                                                                                                                                                                                                                                                                                                                                                                                                                                                                                                                                                                                                                                                                                                                                                                                                                                                                                                                                                                                                                                                                                                                                                                                                                                                                                                                                                                                                                                                                                                                                                                                                                                                                                                                                                                                                                                                                                                                                                                                                       | IQOS menthol | 3R4F cigarette | 1R5F cigarette |                |                |      |           |           |           |           |                                     |             |            |            |            |                  |             |            |            |           |                |           |            |            |            |                     |           |           |           |           |                            |             |             |            |            |                                      |  |  |  |  |                |           |           |            |            |                |            |            |              |             |                |            |            |              |             |                |            |            |              |             |                  |            |             |              |              |
| HPHC                                 | Mean ± SD                                                                                                                                                                                                                                                                                                                                                                                                                                                                                                                                                                                                                                                                                                                                                                                                                                                                                                                                                                                                                                                                                                                                                                                                                                                                                                                                                                                                                                                                                                                                                                                                                                                                                                                                                                                                                                                                                                                                                                                                                                                                                                                                                                                                                                                                          | Mean ± SD    | Mean ± SD      | Mean ± SD      |                |                |      |           |           |           |           |                                     |             |            |            |            |                  |             |            |            |           |                |           |            |            |            |                     |           |           |           |           |                            |             |             |            |            |                                      |  |  |  |  |                |           |           |            |            |                |            |            |              |             |                |            |            |              |             |                |            |            |              |             |                  |            |             |              |              |
| Total particulate matter (mg/stick)  | 44.0 ± 11.4                                                                                                                                                                                                                                                                                                                                                                                                                                                                                                                                                                                                                                                                                                                                                                                                                                                                                                                                                                                                                                                                                                                                                                                                                                                                                                                                                                                                                                                                                                                                                                                                                                                                                                                                                                                                                                                                                                                                                                                                                                                                                                                                                                                                                                                                        | 49.9 ± 8.6   | 36.9 ± 1.9     | 28.9 ± 2.3     |                |                |      |           |           |           |           |                                     |             |            |            |            |                  |             |            |            |           |                |           |            |            |            |                     |           |           |           |           |                            |             |             |            |            |                                      |  |  |  |  |                |           |           |            |            |                |            |            |              |             |                |            |            |              |             |                |            |            |              |             |                  |            |             |              |              |
| Water (mg/stick)                     | 33.1 ± 10.2                                                                                                                                                                                                                                                                                                                                                                                                                                                                                                                                                                                                                                                                                                                                                                                                                                                                                                                                                                                                                                                                                                                                                                                                                                                                                                                                                                                                                                                                                                                                                                                                                                                                                                                                                                                                                                                                                                                                                                                                                                                                                                                                                                                                                                                                        | 35.3 ± 8.3   | 10.1 ± 0.9     | 8.8 ± 1.1      |                |                |      |           |           |           |           |                                     |             |            |            |            |                  |             |            |            |           |                |           |            |            |            |                     |           |           |           |           |                            |             |             |            |            |                                      |  |  |  |  |                |           |           |            |            |                |            |            |              |             |                |            |            |              |             |                |            |            |              |             |                  |            |             |              |              |
| Tar (mg/stick)                       | 9.8 ± 3.0                                                                                                                                                                                                                                                                                                                                                                                                                                                                                                                                                                                                                                                                                                                                                                                                                                                                                                                                                                                                                                                                                                                                                                                                                                                                                                                                                                                                                                                                                                                                                                                                                                                                                                                                                                                                                                                                                                                                                                                                                                                                                                                                                                                                                                                                          | 13.4 ± 2.2   | 25.2 ± 1.5     | 19.2 ± 1.3     |                |                |      |           |           |           |           |                                     |             |            |            |            |                  |             |            |            |           |                |           |            |            |            |                     |           |           |           |           |                            |             |             |            |            |                                      |  |  |  |  |                |           |           |            |            |                |            |            |              |             |                |            |            |              |             |                |            |            |              |             |                  |            |             |              |              |
| Nicotine (mg/stick)                  | 1.1 ± 0.1                                                                                                                                                                                                                                                                                                                                                                                                                                                                                                                                                                                                                                                                                                                                                                                                                                                                                                                                                                                                                                                                                                                                                                                                                                                                                                                                                                                                                                                                                                                                                                                                                                                                                                                                                                                                                                                                                                                                                                                                                                                                                                                                                                                                                                                                          | 1.2 ± 0.1    | 1.7 ± 0.1      | 1.0 ± 0.1      |                |                |      |           |           |           |           |                                     |             |            |            |            |                  |             |            |            |           |                |           |            |            |            |                     |           |           |           |           |                            |             |             |            |            |                                      |  |  |  |  |                |           |           |            |            |                |            |            |              |             |                |            |            |              |             |                |            |            |              |             |                  |            |             |              |              |
| Carbon monoxide (mg/stick)           | 0.44 ± 0.04                                                                                                                                                                                                                                                                                                                                                                                                                                                                                                                                                                                                                                                                                                                                                                                                                                                                                                                                                                                                                                                                                                                                                                                                                                                                                                                                                                                                                                                                                                                                                                                                                                                                                                                                                                                                                                                                                                                                                                                                                                                                                                                                                                                                                                                                        | 0.43 ± 0.04  | 33.0 ± 1.8     | 29.7 ± 1.7     |                |                |      |           |           |           |           |                                     |             |            |            |            |                  |             |            |            |           |                |           |            |            |            |                     |           |           |           |           |                            |             |             |            |            |                                      |  |  |  |  |                |           |           |            |            |                |            |            |              |             |                |            |            |              |             |                |            |            |              |             |                  |            |             |              |              |
| <b>Tobacco-specific nitrosamines</b> |                                                                                                                                                                                                                                                                                                                                                                                                                                                                                                                                                                                                                                                                                                                                                                                                                                                                                                                                                                                                                                                                                                                                                                                                                                                                                                                                                                                                                                                                                                                                                                                                                                                                                                                                                                                                                                                                                                                                                                                                                                                                                                                                                                                                                                                                                    |              |                |                |                |                |      |           |           |           |           |                                     |             |            |            |            |                  |             |            |            |           |                |           |            |            |            |                     |           |           |           |           |                            |             |             |            |            |                                      |  |  |  |  |                |           |           |            |            |                |            |            |              |             |                |            |            |              |             |                |            |            |              |             |                  |            |             |              |              |
| NAB (ng/stick)                       | 4.5 ± 0.5                                                                                                                                                                                                                                                                                                                                                                                                                                                                                                                                                                                                                                                                                                                                                                                                                                                                                                                                                                                                                                                                                                                                                                                                                                                                                                                                                                                                                                                                                                                                                                                                                                                                                                                                                                                                                                                                                                                                                                                                                                                                                                                                                                                                                                                                          | 5.5 ± 0.6    | 30.4 ± 2.0     | 26.2 ± 0.5     |                |                |      |           |           |           |           |                                     |             |            |            |            |                  |             |            |            |           |                |           |            |            |            |                     |           |           |           |           |                            |             |             |            |            |                                      |  |  |  |  |                |           |           |            |            |                |            |            |              |             |                |            |            |              |             |                |            |            |              |             |                  |            |             |              |              |
| NAT (ng/stick)                       | 34.0 ± 3.1                                                                                                                                                                                                                                                                                                                                                                                                                                                                                                                                                                                                                                                                                                                                                                                                                                                                                                                                                                                                                                                                                                                                                                                                                                                                                                                                                                                                                                                                                                                                                                                                                                                                                                                                                                                                                                                                                                                                                                                                                                                                                                                                                                                                                                                                         | 37.2 ± 3.9   | 246.4 ± 16.9   | 183.1 ± 6.0    |                |                |      |           |           |           |           |                                     |             |            |            |            |                  |             |            |            |           |                |           |            |            |            |                     |           |           |           |           |                            |             |             |            |            |                                      |  |  |  |  |                |           |           |            |            |                |            |            |              |             |                |            |            |              |             |                |            |            |              |             |                  |            |             |              |              |
| NNN (ng/stick)                       | 19.2 ± 2.1                                                                                                                                                                                                                                                                                                                                                                                                                                                                                                                                                                                                                                                                                                                                                                                                                                                                                                                                                                                                                                                                                                                                                                                                                                                                                                                                                                                                                                                                                                                                                                                                                                                                                                                                                                                                                                                                                                                                                                                                                                                                                                                                                                                                                                                                         | 24.9 ± 3.5   | 311.1 ± 24.3   | 240.7 ± 6.6    |                |                |      |           |           |           |           |                                     |             |            |            |            |                  |             |            |            |           |                |           |            |            |            |                     |           |           |           |           |                            |             |             |            |            |                                      |  |  |  |  |                |           |           |            |            |                |            |            |              |             |                |            |            |              |             |                |            |            |              |             |                  |            |             |              |              |
| NNK (ng/stick)                       | 12.3 ± 1.5                                                                                                                                                                                                                                                                                                                                                                                                                                                                                                                                                                                                                                                                                                                                                                                                                                                                                                                                                                                                                                                                                                                                                                                                                                                                                                                                                                                                                                                                                                                                                                                                                                                                                                                                                                                                                                                                                                                                                                                                                                                                                                                                                                                                                                                                         | 13.8 ± 2.6   | 250.4 ± 13.7   | 107.0 ± 5.0    |                |                |      |           |           |           |           |                                     |             |            |            |            |                  |             |            |            |           |                |           |            |            |            |                     |           |           |           |           |                            |             |             |            |            |                                      |  |  |  |  |                |           |           |            |            |                |            |            |              |             |                |            |            |              |             |                |            |            |              |             |                  |            |             |              |              |
| Total (ng/stick)                     | 70.0 ± 7.2                                                                                                                                                                                                                                                                                                                                                                                                                                                                                                                                                                                                                                                                                                                                                                                                                                                                                                                                                                                                                                                                                                                                                                                                                                                                                                                                                                                                                                                                                                                                                                                                                                                                                                                                                                                                                                                                                                                                                                                                                                                                                                                                                                                                                                                                         | 81.4 ± 10.4  | 838.2 ± 53.7   | 557.1 ± 15.7   |                |                |      |           |           |           |           |                                     |             |            |            |            |                  |             |            |            |           |                |           |            |            |            |                     |           |           |           |           |                            |             |             |            |            |                                      |  |  |  |  |                |           |           |            |            |                |            |            |              |             |                |            |            |              |             |                |            |            |              |             |                  |            |             |              |              |
| <b>Authors' conclusions</b>          | <ul style="list-style-type: none"> <li>• Although at lower concentrations than in the mainstream smoke of reference cigarettes, IQOS mainstream emissions definitely include toxic compounds which may have adverse effects on a user and bystanders.</li> </ul>                                                                                                                                                                                                                                                                                                                                                                                                                                                                                                                                                                                                                                                                                                                                                                                                                                                                                                                                                                                                                                                                                                                                                                                                                                                                                                                                                                                                                                                                                                                                                                                                                                                                                                                                                                                                                                                                                                                                                                                                                   |              |                |                |                |                |      |           |           |           |           |                                     |             |            |            |            |                  |             |            |            |           |                |           |            |            |            |                     |           |           |           |           |                            |             |             |            |            |                                      |  |  |  |  |                |           |           |            |            |                |            |            |              |             |                |            |            |              |             |                |            |            |              |             |                  |            |             |              |              |
| <b>Authors, study year</b>           | <b>Eaton et al., 2017 [23]</b>                                                                                                                                                                                                                                                                                                                                                                                                                                                                                                                                                                                                                                                                                                                                                                                                                                                                                                                                                                                                                                                                                                                                                                                                                                                                                                                                                                                                                                                                                                                                                                                                                                                                                                                                                                                                                                                                                                                                                                                                                                                                                                                                                                                                                                                     |              |                |                |                |                |      |           |           |           |           |                                     |             |            |            |            |                  |             |            |            |           |                |           |            |            |            |                     |           |           |           |           |                            |             |             |            |            |                                      |  |  |  |  |                |           |           |            |            |                |            |            |              |             |                |            |            |              |             |                |            |            |              |             |                  |            |             |              |              |
| <b>Funder/Affiliations</b>           | <p><b>Funded by:</b> British American Tobacco Investments Ltd</p> <p><b>Affiliations:</b> Research and Development, British American Tobacco Investments Ltd, Regents Park Road, Southampton, Hampshire SO15 8TL, UK</p>                                                                                                                                                                                                                                                                                                                                                                                                                                                                                                                                                                                                                                                                                                                                                                                                                                                                                                                                                                                                                                                                                                                                                                                                                                                                                                                                                                                                                                                                                                                                                                                                                                                                                                                                                                                                                                                                                                                                                                                                                                                           |              |                |                |                |                |      |           |           |           |           |                                     |             |            |            |            |                  |             |            |            |           |                |           |            |            |            |                     |           |           |           |           |                            |             |             |            |            |                                      |  |  |  |  |                |           |           |            |            |                |            |            |              |             |                |            |            |              |             |                |            |            |              |             |                  |            |             |              |              |
| <b>Primary aim</b>                   | To compare levels of HPHC in mainstream glo emissions with those in mainstream cigarette smoke                                                                                                                                                                                                                                                                                                                                                                                                                                                                                                                                                                                                                                                                                                                                                                                                                                                                                                                                                                                                                                                                                                                                                                                                                                                                                                                                                                                                                                                                                                                                                                                                                                                                                                                                                                                                                                                                                                                                                                                                                                                                                                                                                                                     |              |                |                |                |                |      |           |           |           |           |                                     |             |            |            |            |                  |             |            |            |           |                |           |            |            |            |                     |           |           |           |           |                            |             |             |            |            |                                      |  |  |  |  |                |           |           |            |            |                |            |            |              |             |                |            |            |              |             |                |            |            |              |             |                  |            |             |              |              |
| <b>Products used</b>                 | <ul style="list-style-type: none"> <li>• Reference cigarette 3R4F</li> <li>• HnB device THP 1.0/glo with tobacco plug (blended Virginia tobacco processed by a paper-style reconstitution process)</li> </ul>                                                                                                                                                                                                                                                                                                                                                                                                                                                                                                                                                                                                                                                                                                                                                                                                                                                                                                                                                                                                                                                                                                                                                                                                                                                                                                                                                                                                                                                                                                                                                                                                                                                                                                                                                                                                                                                                                                                                                                                                                                                                      |              |                |                |                |                |      |           |           |           |           |                                     |             |            |            |            |                  |             |            |            |           |                |           |            |            |            |                     |           |           |           |           |                            |             |             |            |            |                                      |  |  |  |  |                |           |           |            |            |                |            |            |              |             |                |            |            |              |             |                |            |            |              |             |                  |            |             |              |              |

| <b>Methods</b>                                              | <p><b>Design:</b> Laboratory comparison study using smoking machines</p> <p>Study time and setting: UK, time not reported</p> <p><b>Measures:</b> yields of HPHC in mainstream aerosol from the glo tobacco sticks are compared to yields of HPHC in mainstream smoke from the reference cigarettes</p>                                                                                                                                                                                                                                                                                                                                                                                                                                                                                                                                                                                                                                                                                                                                                                                                                                                                                                                                                                                                                                                                                                                                                                                                                                                                                                                                                                                                                                                                                                                                                                                                                                                                                                                                                                                                                   |                |                |                |               |               |                                |                           |              |                                             |                 |                |                                           |                |              |                                                             |                |              |                                      |             |                |                                  |                 |             |                           |                           |                |                                 |                           |                |                                       |                                |             |                                      |                |                |                |                |              |                |                |              |
|-------------------------------------------------------------|---------------------------------------------------------------------------------------------------------------------------------------------------------------------------------------------------------------------------------------------------------------------------------------------------------------------------------------------------------------------------------------------------------------------------------------------------------------------------------------------------------------------------------------------------------------------------------------------------------------------------------------------------------------------------------------------------------------------------------------------------------------------------------------------------------------------------------------------------------------------------------------------------------------------------------------------------------------------------------------------------------------------------------------------------------------------------------------------------------------------------------------------------------------------------------------------------------------------------------------------------------------------------------------------------------------------------------------------------------------------------------------------------------------------------------------------------------------------------------------------------------------------------------------------------------------------------------------------------------------------------------------------------------------------------------------------------------------------------------------------------------------------------------------------------------------------------------------------------------------------------------------------------------------------------------------------------------------------------------------------------------------------------------------------------------------------------------------------------------------------------|----------------|----------------|----------------|---------------|---------------|--------------------------------|---------------------------|--------------|---------------------------------------------|-----------------|----------------|-------------------------------------------|----------------|--------------|-------------------------------------------------------------|----------------|--------------|--------------------------------------|-------------|----------------|----------------------------------|-----------------|-------------|---------------------------|---------------------------|----------------|---------------------------------|---------------------------|----------------|---------------------------------------|--------------------------------|-------------|--------------------------------------|----------------|----------------|----------------|----------------|--------------|----------------|----------------|--------------|
| <b>Participants</b>                                         | Not reported                                                                                                                                                                                                                                                                                                                                                                                                                                                                                                                                                                                                                                                                                                                                                                                                                                                                                                                                                                                                                                                                                                                                                                                                                                                                                                                                                                                                                                                                                                                                                                                                                                                                                                                                                                                                                                                                                                                                                                                                                                                                                                              |                |                |                |               |               |                                |                           |              |                                             |                 |                |                                           |                |              |                                                             |                |              |                                      |             |                |                                  |                 |             |                           |                           |                |                                 |                           |                |                                       |                                |             |                                      |                |                |                |                |              |                |                |              |
| <b>Interventions/Exposure</b>                               | Both glo and the reference cigarette were smoked under HCl regimen. Each sampling was performed by 5 cigarettes and tobacco sticks, one cigarette was puffed until the butt mark was reached (10.3 puffs per cigarette), and a tobacco stick was puffed 8 times                                                                                                                                                                                                                                                                                                                                                                                                                                                                                                                                                                                                                                                                                                                                                                                                                                                                                                                                                                                                                                                                                                                                                                                                                                                                                                                                                                                                                                                                                                                                                                                                                                                                                                                                                                                                                                                           |                |                |                |               |               |                                |                           |              |                                             |                 |                |                                           |                |              |                                                             |                |              |                                      |             |                |                                  |                 |             |                           |                           |                |                                 |                           |                |                                       |                                |             |                                      |                |                |                |                |              |                |                |              |
| <b>Outcome/Key findings</b>                                 | <ul style="list-style-type: none"> <li>The maximum proximal heater temperature of glo was <math>240 \pm 3^\circ\text{C}</math>.</li> </ul> <p><b>Yields of HPHC in the mainstream aerosol of glo tobacco sticks and in mainstream smoke of 3R4F reference cigarette</b></p> <table border="1"> <thead> <tr> <th rowspan="2">HPHC</th> <th>THP 1.0/glo</th> <th>3R4F cigarette</th> </tr> <tr> <th>Mean <math>\pm</math> SD</th> <th>Mean <math>\pm</math> SD</th> </tr> </thead> <tbody> <tr> <td>Carbon monoxide (CO, mg/stick)</td> <td>Not quantifiable (&lt;0.233)</td> <td><math>32 \pm 0.9</math></td> </tr> <tr> <td>Carbon dioxide (CO<sub>2</sub>, mg/stick)</td> <td><math>2.35 \pm 0.14</math></td> <td><math>85.1 \pm 4.0</math></td> </tr> <tr> <td>Nitrogen oxide (NO, <math>\mu\text{g}</math>/stick)</td> <td><math>10.1 \pm 0.4</math></td> <td><math>496 \pm 16</math></td> </tr> <tr> <td>Oxides of nitrogen (NO<sub>x</sub>, <math>\mu\text{g}</math>/stick)</td> <td><math>12.0 \pm 0.4</math></td> <td><math>553 \pm 16</math></td> </tr> <tr> <td>Acetaldehyde (<math>\mu\text{g}</math>/stick)</td> <td><math>111 \pm 8</math></td> <td><math>2200 \pm 103</math></td> </tr> <tr> <td>Acrolein (<math>\mu\text{g}</math>/stick)</td> <td><math>2.22 \pm 0.52</math></td> <td><math>157 \pm 9</math></td> </tr> <tr> <td>Benzo(a)pyrene (ng/stick)</td> <td>Not quantifiable (&lt;0.354)</td> <td><math>12.9 \pm 1.3</math></td> </tr> <tr> <td>Benzene (<math>\mu\text{g}</math>/stick)</td> <td>Not quantifiable (&lt;0.056)</td> <td><math>78.6 \pm 4.6</math></td> </tr> <tr> <td>1,3-Butadiene (<math>\mu\text{g}</math>/stick)</td> <td>Below detection limit (&lt;0.029)</td> <td><math>108 \pm 4</math></td> </tr> <tr> <td>Formaldehyde (<math>\mu\text{g}</math>/stick)</td> <td><math>3.29 \pm 0.3</math></td> <td><math>54.1 \pm 6.0</math></td> </tr> <tr> <td>NNN (ng/stick)</td> <td><math>24.7 \pm 2.5</math></td> <td><math>263 \pm 12</math></td> </tr> <tr> <td>NNK (ng/stick)</td> <td><math>6.6 \pm 0.86</math></td> <td><math>281 \pm 16</math></td> </tr> </tbody> </table> | HPHC           | THP 1.0/glo    | 3R4F cigarette | Mean $\pm$ SD | Mean $\pm$ SD | Carbon monoxide (CO, mg/stick) | Not quantifiable (<0.233) | $32 \pm 0.9$ | Carbon dioxide (CO <sub>2</sub> , mg/stick) | $2.35 \pm 0.14$ | $85.1 \pm 4.0$ | Nitrogen oxide (NO, $\mu\text{g}$ /stick) | $10.1 \pm 0.4$ | $496 \pm 16$ | Oxides of nitrogen (NO <sub>x</sub> , $\mu\text{g}$ /stick) | $12.0 \pm 0.4$ | $553 \pm 16$ | Acetaldehyde ( $\mu\text{g}$ /stick) | $111 \pm 8$ | $2200 \pm 103$ | Acrolein ( $\mu\text{g}$ /stick) | $2.22 \pm 0.52$ | $157 \pm 9$ | Benzo(a)pyrene (ng/stick) | Not quantifiable (<0.354) | $12.9 \pm 1.3$ | Benzene ( $\mu\text{g}$ /stick) | Not quantifiable (<0.056) | $78.6 \pm 4.6$ | 1,3-Butadiene ( $\mu\text{g}$ /stick) | Below detection limit (<0.029) | $108 \pm 4$ | Formaldehyde ( $\mu\text{g}$ /stick) | $3.29 \pm 0.3$ | $54.1 \pm 6.0$ | NNN (ng/stick) | $24.7 \pm 2.5$ | $263 \pm 12$ | NNK (ng/stick) | $6.6 \pm 0.86$ | $281 \pm 16$ |
| HPHC                                                        | THP 1.0/glo                                                                                                                                                                                                                                                                                                                                                                                                                                                                                                                                                                                                                                                                                                                                                                                                                                                                                                                                                                                                                                                                                                                                                                                                                                                                                                                                                                                                                                                                                                                                                                                                                                                                                                                                                                                                                                                                                                                                                                                                                                                                                                               |                | 3R4F cigarette |                |               |               |                                |                           |              |                                             |                 |                |                                           |                |              |                                                             |                |              |                                      |             |                |                                  |                 |             |                           |                           |                |                                 |                           |                |                                       |                                |             |                                      |                |                |                |                |              |                |                |              |
|                                                             | Mean $\pm$ SD                                                                                                                                                                                                                                                                                                                                                                                                                                                                                                                                                                                                                                                                                                                                                                                                                                                                                                                                                                                                                                                                                                                                                                                                                                                                                                                                                                                                                                                                                                                                                                                                                                                                                                                                                                                                                                                                                                                                                                                                                                                                                                             | Mean $\pm$ SD  |                |                |               |               |                                |                           |              |                                             |                 |                |                                           |                |              |                                                             |                |              |                                      |             |                |                                  |                 |             |                           |                           |                |                                 |                           |                |                                       |                                |             |                                      |                |                |                |                |              |                |                |              |
| Carbon monoxide (CO, mg/stick)                              | Not quantifiable (<0.233)                                                                                                                                                                                                                                                                                                                                                                                                                                                                                                                                                                                                                                                                                                                                                                                                                                                                                                                                                                                                                                                                                                                                                                                                                                                                                                                                                                                                                                                                                                                                                                                                                                                                                                                                                                                                                                                                                                                                                                                                                                                                                                 | $32 \pm 0.9$   |                |                |               |               |                                |                           |              |                                             |                 |                |                                           |                |              |                                                             |                |              |                                      |             |                |                                  |                 |             |                           |                           |                |                                 |                           |                |                                       |                                |             |                                      |                |                |                |                |              |                |                |              |
| Carbon dioxide (CO <sub>2</sub> , mg/stick)                 | $2.35 \pm 0.14$                                                                                                                                                                                                                                                                                                                                                                                                                                                                                                                                                                                                                                                                                                                                                                                                                                                                                                                                                                                                                                                                                                                                                                                                                                                                                                                                                                                                                                                                                                                                                                                                                                                                                                                                                                                                                                                                                                                                                                                                                                                                                                           | $85.1 \pm 4.0$ |                |                |               |               |                                |                           |              |                                             |                 |                |                                           |                |              |                                                             |                |              |                                      |             |                |                                  |                 |             |                           |                           |                |                                 |                           |                |                                       |                                |             |                                      |                |                |                |                |              |                |                |              |
| Nitrogen oxide (NO, $\mu\text{g}$ /stick)                   | $10.1 \pm 0.4$                                                                                                                                                                                                                                                                                                                                                                                                                                                                                                                                                                                                                                                                                                                                                                                                                                                                                                                                                                                                                                                                                                                                                                                                                                                                                                                                                                                                                                                                                                                                                                                                                                                                                                                                                                                                                                                                                                                                                                                                                                                                                                            | $496 \pm 16$   |                |                |               |               |                                |                           |              |                                             |                 |                |                                           |                |              |                                                             |                |              |                                      |             |                |                                  |                 |             |                           |                           |                |                                 |                           |                |                                       |                                |             |                                      |                |                |                |                |              |                |                |              |
| Oxides of nitrogen (NO <sub>x</sub> , $\mu\text{g}$ /stick) | $12.0 \pm 0.4$                                                                                                                                                                                                                                                                                                                                                                                                                                                                                                                                                                                                                                                                                                                                                                                                                                                                                                                                                                                                                                                                                                                                                                                                                                                                                                                                                                                                                                                                                                                                                                                                                                                                                                                                                                                                                                                                                                                                                                                                                                                                                                            | $553 \pm 16$   |                |                |               |               |                                |                           |              |                                             |                 |                |                                           |                |              |                                                             |                |              |                                      |             |                |                                  |                 |             |                           |                           |                |                                 |                           |                |                                       |                                |             |                                      |                |                |                |                |              |                |                |              |
| Acetaldehyde ( $\mu\text{g}$ /stick)                        | $111 \pm 8$                                                                                                                                                                                                                                                                                                                                                                                                                                                                                                                                                                                                                                                                                                                                                                                                                                                                                                                                                                                                                                                                                                                                                                                                                                                                                                                                                                                                                                                                                                                                                                                                                                                                                                                                                                                                                                                                                                                                                                                                                                                                                                               | $2200 \pm 103$ |                |                |               |               |                                |                           |              |                                             |                 |                |                                           |                |              |                                                             |                |              |                                      |             |                |                                  |                 |             |                           |                           |                |                                 |                           |                |                                       |                                |             |                                      |                |                |                |                |              |                |                |              |
| Acrolein ( $\mu\text{g}$ /stick)                            | $2.22 \pm 0.52$                                                                                                                                                                                                                                                                                                                                                                                                                                                                                                                                                                                                                                                                                                                                                                                                                                                                                                                                                                                                                                                                                                                                                                                                                                                                                                                                                                                                                                                                                                                                                                                                                                                                                                                                                                                                                                                                                                                                                                                                                                                                                                           | $157 \pm 9$    |                |                |               |               |                                |                           |              |                                             |                 |                |                                           |                |              |                                                             |                |              |                                      |             |                |                                  |                 |             |                           |                           |                |                                 |                           |                |                                       |                                |             |                                      |                |                |                |                |              |                |                |              |
| Benzo(a)pyrene (ng/stick)                                   | Not quantifiable (<0.354)                                                                                                                                                                                                                                                                                                                                                                                                                                                                                                                                                                                                                                                                                                                                                                                                                                                                                                                                                                                                                                                                                                                                                                                                                                                                                                                                                                                                                                                                                                                                                                                                                                                                                                                                                                                                                                                                                                                                                                                                                                                                                                 | $12.9 \pm 1.3$ |                |                |               |               |                                |                           |              |                                             |                 |                |                                           |                |              |                                                             |                |              |                                      |             |                |                                  |                 |             |                           |                           |                |                                 |                           |                |                                       |                                |             |                                      |                |                |                |                |              |                |                |              |
| Benzene ( $\mu\text{g}$ /stick)                             | Not quantifiable (<0.056)                                                                                                                                                                                                                                                                                                                                                                                                                                                                                                                                                                                                                                                                                                                                                                                                                                                                                                                                                                                                                                                                                                                                                                                                                                                                                                                                                                                                                                                                                                                                                                                                                                                                                                                                                                                                                                                                                                                                                                                                                                                                                                 | $78.6 \pm 4.6$ |                |                |               |               |                                |                           |              |                                             |                 |                |                                           |                |              |                                                             |                |              |                                      |             |                |                                  |                 |             |                           |                           |                |                                 |                           |                |                                       |                                |             |                                      |                |                |                |                |              |                |                |              |
| 1,3-Butadiene ( $\mu\text{g}$ /stick)                       | Below detection limit (<0.029)                                                                                                                                                                                                                                                                                                                                                                                                                                                                                                                                                                                                                                                                                                                                                                                                                                                                                                                                                                                                                                                                                                                                                                                                                                                                                                                                                                                                                                                                                                                                                                                                                                                                                                                                                                                                                                                                                                                                                                                                                                                                                            | $108 \pm 4$    |                |                |               |               |                                |                           |              |                                             |                 |                |                                           |                |              |                                                             |                |              |                                      |             |                |                                  |                 |             |                           |                           |                |                                 |                           |                |                                       |                                |             |                                      |                |                |                |                |              |                |                |              |
| Formaldehyde ( $\mu\text{g}$ /stick)                        | $3.29 \pm 0.3$                                                                                                                                                                                                                                                                                                                                                                                                                                                                                                                                                                                                                                                                                                                                                                                                                                                                                                                                                                                                                                                                                                                                                                                                                                                                                                                                                                                                                                                                                                                                                                                                                                                                                                                                                                                                                                                                                                                                                                                                                                                                                                            | $54.1 \pm 6.0$ |                |                |               |               |                                |                           |              |                                             |                 |                |                                           |                |              |                                                             |                |              |                                      |             |                |                                  |                 |             |                           |                           |                |                                 |                           |                |                                       |                                |             |                                      |                |                |                |                |              |                |                |              |
| NNN (ng/stick)                                              | $24.7 \pm 2.5$                                                                                                                                                                                                                                                                                                                                                                                                                                                                                                                                                                                                                                                                                                                                                                                                                                                                                                                                                                                                                                                                                                                                                                                                                                                                                                                                                                                                                                                                                                                                                                                                                                                                                                                                                                                                                                                                                                                                                                                                                                                                                                            | $263 \pm 12$   |                |                |               |               |                                |                           |              |                                             |                 |                |                                           |                |              |                                                             |                |              |                                      |             |                |                                  |                 |             |                           |                           |                |                                 |                           |                |                                       |                                |             |                                      |                |                |                |                |              |                |                |              |
| NNK (ng/stick)                                              | $6.6 \pm 0.86$                                                                                                                                                                                                                                                                                                                                                                                                                                                                                                                                                                                                                                                                                                                                                                                                                                                                                                                                                                                                                                                                                                                                                                                                                                                                                                                                                                                                                                                                                                                                                                                                                                                                                                                                                                                                                                                                                                                                                                                                                                                                                                            | $281 \pm 16$   |                |                |               |               |                                |                           |              |                                             |                 |                |                                           |                |              |                                                             |                |              |                                      |             |                |                                  |                 |             |                           |                           |                |                                 |                           |                |                                       |                                |             |                                      |                |                |                |                |              |                |                |              |
| <b>Authors' conclusions</b>                                 | <ul style="list-style-type: none"> <li>The temperature of tobacco in the proximal and distal zones of glo/THP1.0 did not exceed <math>250^\circ\text{C}</math></li> <li>Levels of HPHC in aerosol from glo/THP1.0 indicated very low thermal decomposition of the tobacco</li> </ul>                                                                                                                                                                                                                                                                                                                                                                                                                                                                                                                                                                                                                                                                                                                                                                                                                                                                                                                                                                                                                                                                                                                                                                                                                                                                                                                                                                                                                                                                                                                                                                                                                                                                                                                                                                                                                                      |                |                |                |               |               |                                |                           |              |                                             |                 |                |                                           |                |              |                                                             |                |              |                                      |             |                |                                  |                 |             |                           |                           |                |                                 |                           |                |                                       |                                |             |                                      |                |                |                |                |              |                |                |              |
| <b>Authors, study year</b>                                  | <b>Forster et al., 2017</b> [24]                                                                                                                                                                                                                                                                                                                                                                                                                                                                                                                                                                                                                                                                                                                                                                                                                                                                                                                                                                                                                                                                                                                                                                                                                                                                                                                                                                                                                                                                                                                                                                                                                                                                                                                                                                                                                                                                                                                                                                                                                                                                                          |                |                |                |               |               |                                |                           |              |                                             |                 |                |                                           |                |              |                                                             |                |              |                                      |             |                |                                  |                 |             |                           |                           |                |                                 |                           |                |                                       |                                |             |                                      |                |                |                |                |              |                |                |              |
| <b>Funder/Affiliations</b>                                  | <p><b>Funded by:</b> British American Tobacco Investments Ltd</p> <p><b>Affiliations:</b> Research and Development, British American Tobacco Investments Ltd, Regents Park Road, Southampton, Hampshire</p>                                                                                                                                                                                                                                                                                                                                                                                                                                                                                                                                                                                                                                                                                                                                                                                                                                                                                                                                                                                                                                                                                                                                                                                                                                                                                                                                                                                                                                                                                                                                                                                                                                                                                                                                                                                                                                                                                                               |                |                |                |               |               |                                |                           |              |                                             |                 |                |                                           |                |              |                                                             |                |              |                                      |             |                |                                  |                 |             |                           |                           |                |                                 |                           |                |                                       |                                |             |                                      |                |                |                |                |              |                |                |              |



|                               | SO15 8TL, UK                                                                                                                                                                                                                                                                                                                                                                                                                                                                                                                                                                                                                                                                                                                                                                                                                                                                                                                                                                                                                                                                                                                                                                                                                                                                                                                                                                                                                                                                                                                                                                                                                                                                                                                                                                                           |               |                |               |                |              |      |           |           |           |           |                          |             |             |         |               |                               |            |            |            |               |                               |            |             |            |               |                            |            |            |             |            |                         |         |          |            |          |                     |             |             |         |             |                          |             |             |            |            |                    |             |             |            |            |                    |            |            |            |               |                           |            |               |            |               |
|-------------------------------|--------------------------------------------------------------------------------------------------------------------------------------------------------------------------------------------------------------------------------------------------------------------------------------------------------------------------------------------------------------------------------------------------------------------------------------------------------------------------------------------------------------------------------------------------------------------------------------------------------------------------------------------------------------------------------------------------------------------------------------------------------------------------------------------------------------------------------------------------------------------------------------------------------------------------------------------------------------------------------------------------------------------------------------------------------------------------------------------------------------------------------------------------------------------------------------------------------------------------------------------------------------------------------------------------------------------------------------------------------------------------------------------------------------------------------------------------------------------------------------------------------------------------------------------------------------------------------------------------------------------------------------------------------------------------------------------------------------------------------------------------------------------------------------------------------|---------------|----------------|---------------|----------------|--------------|------|-----------|-----------|-----------|-----------|--------------------------|-------------|-------------|---------|---------------|-------------------------------|------------|------------|------------|---------------|-------------------------------|------------|-------------|------------|---------------|----------------------------|------------|------------|-------------|------------|-------------------------|---------|----------|------------|----------|---------------------|-------------|-------------|---------|-------------|--------------------------|-------------|-------------|------------|------------|--------------------|-------------|-------------|------------|------------|--------------------|------------|------------|------------|---------------|---------------------------|------------|---------------|------------|---------------|
| <b>Primary aim</b>            | To compare levels of HPHC in mainstream glo emissions with those in mainstream IQOS emissions and cigarette smoke                                                                                                                                                                                                                                                                                                                                                                                                                                                                                                                                                                                                                                                                                                                                                                                                                                                                                                                                                                                                                                                                                                                                                                                                                                                                                                                                                                                                                                                                                                                                                                                                                                                                                      |               |                |               |                |              |      |           |           |           |           |                          |             |             |         |               |                               |            |            |            |               |                               |            |             |            |               |                            |            |            |             |            |                         |         |          |            |          |                     |             |             |         |             |                          |             |             |            |            |                    |             |             |            |            |                    |            |            |            |               |                           |            |               |            |               |
| <b>Products used</b>          | <ul style="list-style-type: none"> <li>Reference cigarette 3R4F (ISO tar yield 9.4 mg/cigarette in 9 puffs)</li> <li>Reference cigarette 1R6F (ISO tar yield 8.6 mg/cigarette in 7.5 puffs)</li> <li>Electronic heating device THP 1.0 (glo) with regular and menthol tobacco plugs (blended Virginia tobacco, Bright Tobacco Kent Neostiks and Intensely Fresh Kent Neostiks). Tobacco sticks were sourced from Japan</li> <li>IQOS with Essence tobacco stick sourced from Japan</li> </ul>                                                                                                                                                                                                                                                                                                                                                                                                                                                                                                                                                                                                                                                                                                                                                                                                                                                                                                                                                                                                                                                                                                                                                                                                                                                                                                          |               |                |               |                |              |      |           |           |           |           |                          |             |             |         |               |                               |            |            |            |               |                               |            |             |            |               |                            |            |            |             |            |                         |         |          |            |          |                     |             |             |         |             |                          |             |             |            |            |                    |             |             |            |            |                    |            |            |            |               |                           |            |               |            |               |
| <b>Methods</b>                | <p><b>Design:</b> Laboratory comparison study using smoking machines</p> <p>Study time and setting: UK, time not reported</p> <p><b>Measures:</b> yields of HPHC in the mainstream aerosol from the glo tobacco sticks compared to yields of HPHC in the mainstream emissions from the reference cigarettes and IQOS</p>                                                                                                                                                                                                                                                                                                                                                                                                                                                                                                                                                                                                                                                                                                                                                                                                                                                                                                                                                                                                                                                                                                                                                                                                                                                                                                                                                                                                                                                                               |               |                |               |                |              |      |           |           |           |           |                          |             |             |         |               |                               |            |            |            |               |                               |            |             |            |               |                            |            |            |             |            |                         |         |          |            |          |                     |             |             |         |             |                          |             |             |            |            |                    |             |             |            |            |                    |            |            |            |               |                           |            |               |            |               |
| <b>Participants</b>           | Not reported                                                                                                                                                                                                                                                                                                                                                                                                                                                                                                                                                                                                                                                                                                                                                                                                                                                                                                                                                                                                                                                                                                                                                                                                                                                                                                                                                                                                                                                                                                                                                                                                                                                                                                                                                                                           |               |                |               |                |              |      |           |           |           |           |                          |             |             |         |               |                               |            |            |            |               |                               |            |             |            |               |                            |            |            |             |            |                         |         |          |            |          |                     |             |             |         |             |                          |             |             |            |            |                    |             |             |            |            |                    |            |            |            |               |                           |            |               |            |               |
| <b>Interventions/Exposure</b> | Glo/THP 1.0, the reference cigarettes and IQOS were smoked under HCI regimen. Five replicates were performed for HnB products with each sampling consisting of 5 tobacco sticks. For the reference cigarettes, five replicates were conducted for each with usually three cigarettes per replicate. One cigarette was puffed until the butt mark was reached (10.9 puffs per cigarette on average), and a tobacco stick was puffed 8 times                                                                                                                                                                                                                                                                                                                                                                                                                                                                                                                                                                                                                                                                                                                                                                                                                                                                                                                                                                                                                                                                                                                                                                                                                                                                                                                                                             |               |                |               |                |              |      |           |           |           |           |                          |             |             |         |               |                               |            |            |            |               |                               |            |             |            |               |                            |            |            |             |            |                         |         |          |            |          |                     |             |             |         |             |                          |             |             |            |            |                    |             |             |            |            |                    |            |            |            |               |                           |            |               |            |               |
| <b>Outcome/Key findings</b>   | <p><b>Yields of HPHC in the mainstream aerosol of THP1.0 (glo) regular and menthol tobacco sticks, in mainstream smoke of 3R4F reference cigarette and in IQOS aerosol from regular tobacco stick</b></p> <table border="1"> <thead> <tr> <th></th> <th>glo regular</th> <th>glo menthol</th> <th>3R4F cigarette</th> <th>IQOS regular</th> </tr> <tr> <th>HPHC</th> <th>Mean ± SD</th> <th>Mean ± SD</th> <th>Mean ± SD</th> <th>Mean ± SD</th> </tr> </thead> <tbody> <tr> <td>1,3-Butadiene (µg/stick)</td> <td>BDL (0.029)</td> <td>BDL (0.029)</td> <td>108 ± 4</td> <td>0.224 ± 0.016</td> </tr> <tr> <td>1-Aminonaphthalene (ng/stick)</td> <td>NQ (0.027)</td> <td>NQ (0.027)</td> <td>17.6 ± 0.6</td> <td>0.030 ± 0.013</td> </tr> <tr> <td>2-Aminonaphthalene (ng/stick)</td> <td>NQ (0.012)</td> <td>BDL (0.004)</td> <td>13.2 ± 0.8</td> <td>0.016 ± 0.008</td> </tr> <tr> <td>4-Aminobiphenyl (ng/stick)</td> <td>NQ (0.005)</td> <td>NQ (0.005)</td> <td>2.29 ± 0.12</td> <td>NQ (0.005)</td> </tr> <tr> <td>Acetaldehyde (µg/stick)</td> <td>111 ± 8</td> <td>115 ± 11</td> <td>2200 ± 103</td> <td>327 ± 20</td> </tr> <tr> <td>Acrolein (µg/stick)</td> <td>2.22 ± 0.52</td> <td>2.50 ± 0.11</td> <td>157 ± 9</td> <td>9.98 ± 1.13</td> </tr> <tr> <td>Acrylonitrile (µg/stick)</td> <td>BDL (0.032)</td> <td>BDL (0.032)</td> <td>19.5 ± 1.6</td> <td>NQ (0.107)</td> </tr> <tr> <td>Ammonia (µg/stick)</td> <td>4.01 ± 0.99</td> <td>5.02 ± 0.49</td> <td>32.5 ± 3.5</td> <td>10.6 ± 0.7</td> </tr> <tr> <td>Benzene (µg/stick)</td> <td>NQ (0.056)</td> <td>NQ (0.056)</td> <td>78.6 ± 4.6</td> <td>0.457 ± 0.029</td> </tr> <tr> <td>Benzo[a]pyrene (ng/stick)</td> <td>NQ (0.354)</td> <td>0.356 ± 0.079</td> <td>12.9 ± 1.3</td> <td>0.582 ± 0.024</td> </tr> </tbody> </table> |               | glo regular    | glo menthol   | 3R4F cigarette | IQOS regular | HPHC | Mean ± SD | Mean ± SD | Mean ± SD | Mean ± SD | 1,3-Butadiene (µg/stick) | BDL (0.029) | BDL (0.029) | 108 ± 4 | 0.224 ± 0.016 | 1-Aminonaphthalene (ng/stick) | NQ (0.027) | NQ (0.027) | 17.6 ± 0.6 | 0.030 ± 0.013 | 2-Aminonaphthalene (ng/stick) | NQ (0.012) | BDL (0.004) | 13.2 ± 0.8 | 0.016 ± 0.008 | 4-Aminobiphenyl (ng/stick) | NQ (0.005) | NQ (0.005) | 2.29 ± 0.12 | NQ (0.005) | Acetaldehyde (µg/stick) | 111 ± 8 | 115 ± 11 | 2200 ± 103 | 327 ± 20 | Acrolein (µg/stick) | 2.22 ± 0.52 | 2.50 ± 0.11 | 157 ± 9 | 9.98 ± 1.13 | Acrylonitrile (µg/stick) | BDL (0.032) | BDL (0.032) | 19.5 ± 1.6 | NQ (0.107) | Ammonia (µg/stick) | 4.01 ± 0.99 | 5.02 ± 0.49 | 32.5 ± 3.5 | 10.6 ± 0.7 | Benzene (µg/stick) | NQ (0.056) | NQ (0.056) | 78.6 ± 4.6 | 0.457 ± 0.029 | Benzo[a]pyrene (ng/stick) | NQ (0.354) | 0.356 ± 0.079 | 12.9 ± 1.3 | 0.582 ± 0.024 |
|                               | glo regular                                                                                                                                                                                                                                                                                                                                                                                                                                                                                                                                                                                                                                                                                                                                                                                                                                                                                                                                                                                                                                                                                                                                                                                                                                                                                                                                                                                                                                                                                                                                                                                                                                                                                                                                                                                            | glo menthol   | 3R4F cigarette | IQOS regular  |                |              |      |           |           |           |           |                          |             |             |         |               |                               |            |            |            |               |                               |            |             |            |               |                            |            |            |             |            |                         |         |          |            |          |                     |             |             |         |             |                          |             |             |            |            |                    |             |             |            |            |                    |            |            |            |               |                           |            |               |            |               |
| HPHC                          | Mean ± SD                                                                                                                                                                                                                                                                                                                                                                                                                                                                                                                                                                                                                                                                                                                                                                                                                                                                                                                                                                                                                                                                                                                                                                                                                                                                                                                                                                                                                                                                                                                                                                                                                                                                                                                                                                                              | Mean ± SD     | Mean ± SD      | Mean ± SD     |                |              |      |           |           |           |           |                          |             |             |         |               |                               |            |            |            |               |                               |            |             |            |               |                            |            |            |             |            |                         |         |          |            |          |                     |             |             |         |             |                          |             |             |            |            |                    |             |             |            |            |                    |            |            |            |               |                           |            |               |            |               |
| 1,3-Butadiene (µg/stick)      | BDL (0.029)                                                                                                                                                                                                                                                                                                                                                                                                                                                                                                                                                                                                                                                                                                                                                                                                                                                                                                                                                                                                                                                                                                                                                                                                                                                                                                                                                                                                                                                                                                                                                                                                                                                                                                                                                                                            | BDL (0.029)   | 108 ± 4        | 0.224 ± 0.016 |                |              |      |           |           |           |           |                          |             |             |         |               |                               |            |            |            |               |                               |            |             |            |               |                            |            |            |             |            |                         |         |          |            |          |                     |             |             |         |             |                          |             |             |            |            |                    |             |             |            |            |                    |            |            |            |               |                           |            |               |            |               |
| 1-Aminonaphthalene (ng/stick) | NQ (0.027)                                                                                                                                                                                                                                                                                                                                                                                                                                                                                                                                                                                                                                                                                                                                                                                                                                                                                                                                                                                                                                                                                                                                                                                                                                                                                                                                                                                                                                                                                                                                                                                                                                                                                                                                                                                             | NQ (0.027)    | 17.6 ± 0.6     | 0.030 ± 0.013 |                |              |      |           |           |           |           |                          |             |             |         |               |                               |            |            |            |               |                               |            |             |            |               |                            |            |            |             |            |                         |         |          |            |          |                     |             |             |         |             |                          |             |             |            |            |                    |             |             |            |            |                    |            |            |            |               |                           |            |               |            |               |
| 2-Aminonaphthalene (ng/stick) | NQ (0.012)                                                                                                                                                                                                                                                                                                                                                                                                                                                                                                                                                                                                                                                                                                                                                                                                                                                                                                                                                                                                                                                                                                                                                                                                                                                                                                                                                                                                                                                                                                                                                                                                                                                                                                                                                                                             | BDL (0.004)   | 13.2 ± 0.8     | 0.016 ± 0.008 |                |              |      |           |           |           |           |                          |             |             |         |               |                               |            |            |            |               |                               |            |             |            |               |                            |            |            |             |            |                         |         |          |            |          |                     |             |             |         |             |                          |             |             |            |            |                    |             |             |            |            |                    |            |            |            |               |                           |            |               |            |               |
| 4-Aminobiphenyl (ng/stick)    | NQ (0.005)                                                                                                                                                                                                                                                                                                                                                                                                                                                                                                                                                                                                                                                                                                                                                                                                                                                                                                                                                                                                                                                                                                                                                                                                                                                                                                                                                                                                                                                                                                                                                                                                                                                                                                                                                                                             | NQ (0.005)    | 2.29 ± 0.12    | NQ (0.005)    |                |              |      |           |           |           |           |                          |             |             |         |               |                               |            |            |            |               |                               |            |             |            |               |                            |            |            |             |            |                         |         |          |            |          |                     |             |             |         |             |                          |             |             |            |            |                    |             |             |            |            |                    |            |            |            |               |                           |            |               |            |               |
| Acetaldehyde (µg/stick)       | 111 ± 8                                                                                                                                                                                                                                                                                                                                                                                                                                                                                                                                                                                                                                                                                                                                                                                                                                                                                                                                                                                                                                                                                                                                                                                                                                                                                                                                                                                                                                                                                                                                                                                                                                                                                                                                                                                                | 115 ± 11      | 2200 ± 103     | 327 ± 20      |                |              |      |           |           |           |           |                          |             |             |         |               |                               |            |            |            |               |                               |            |             |            |               |                            |            |            |             |            |                         |         |          |            |          |                     |             |             |         |             |                          |             |             |            |            |                    |             |             |            |            |                    |            |            |            |               |                           |            |               |            |               |
| Acrolein (µg/stick)           | 2.22 ± 0.52                                                                                                                                                                                                                                                                                                                                                                                                                                                                                                                                                                                                                                                                                                                                                                                                                                                                                                                                                                                                                                                                                                                                                                                                                                                                                                                                                                                                                                                                                                                                                                                                                                                                                                                                                                                            | 2.50 ± 0.11   | 157 ± 9        | 9.98 ± 1.13   |                |              |      |           |           |           |           |                          |             |             |         |               |                               |            |            |            |               |                               |            |             |            |               |                            |            |            |             |            |                         |         |          |            |          |                     |             |             |         |             |                          |             |             |            |            |                    |             |             |            |            |                    |            |            |            |               |                           |            |               |            |               |
| Acrylonitrile (µg/stick)      | BDL (0.032)                                                                                                                                                                                                                                                                                                                                                                                                                                                                                                                                                                                                                                                                                                                                                                                                                                                                                                                                                                                                                                                                                                                                                                                                                                                                                                                                                                                                                                                                                                                                                                                                                                                                                                                                                                                            | BDL (0.032)   | 19.5 ± 1.6     | NQ (0.107)    |                |              |      |           |           |           |           |                          |             |             |         |               |                               |            |            |            |               |                               |            |             |            |               |                            |            |            |             |            |                         |         |          |            |          |                     |             |             |         |             |                          |             |             |            |            |                    |             |             |            |            |                    |            |            |            |               |                           |            |               |            |               |
| Ammonia (µg/stick)            | 4.01 ± 0.99                                                                                                                                                                                                                                                                                                                                                                                                                                                                                                                                                                                                                                                                                                                                                                                                                                                                                                                                                                                                                                                                                                                                                                                                                                                                                                                                                                                                                                                                                                                                                                                                                                                                                                                                                                                            | 5.02 ± 0.49   | 32.5 ± 3.5     | 10.6 ± 0.7    |                |              |      |           |           |           |           |                          |             |             |         |               |                               |            |            |            |               |                               |            |             |            |               |                            |            |            |             |            |                         |         |          |            |          |                     |             |             |         |             |                          |             |             |            |            |                    |             |             |            |            |                    |            |            |            |               |                           |            |               |            |               |
| Benzene (µg/stick)            | NQ (0.056)                                                                                                                                                                                                                                                                                                                                                                                                                                                                                                                                                                                                                                                                                                                                                                                                                                                                                                                                                                                                                                                                                                                                                                                                                                                                                                                                                                                                                                                                                                                                                                                                                                                                                                                                                                                             | NQ (0.056)    | 78.6 ± 4.6     | 0.457 ± 0.029 |                |              |      |           |           |           |           |                          |             |             |         |               |                               |            |            |            |               |                               |            |             |            |               |                            |            |            |             |            |                         |         |          |            |          |                     |             |             |         |             |                          |             |             |            |            |                    |             |             |            |            |                    |            |            |            |               |                           |            |               |            |               |
| Benzo[a]pyrene (ng/stick)     | NQ (0.354)                                                                                                                                                                                                                                                                                                                                                                                                                                                                                                                                                                                                                                                                                                                                                                                                                                                                                                                                                                                                                                                                                                                                                                                                                                                                                                                                                                                                                                                                                                                                                                                                                                                                                                                                                                                             | 0.356 ± 0.079 | 12.9 ± 1.3     | 0.582 ± 0.024 |                |              |      |           |           |           |           |                          |             |             |         |               |                               |            |            |            |               |                               |            |             |            |               |                            |            |            |             |            |                         |         |          |            |          |                     |             |             |         |             |                          |             |             |            |            |                    |             |             |            |            |                    |            |            |            |               |                           |            |               |            |               |

|                             |                                                                                                                                                                                                                                                                                                                                                                                                                                                                                                                                                                                                                                                                                                                                                                                                                                                                                                                                                                                                                                                                                                                                                                   |               |               |             |               |
|-----------------------------|-------------------------------------------------------------------------------------------------------------------------------------------------------------------------------------------------------------------------------------------------------------------------------------------------------------------------------------------------------------------------------------------------------------------------------------------------------------------------------------------------------------------------------------------------------------------------------------------------------------------------------------------------------------------------------------------------------------------------------------------------------------------------------------------------------------------------------------------------------------------------------------------------------------------------------------------------------------------------------------------------------------------------------------------------------------------------------------------------------------------------------------------------------------------|---------------|---------------|-------------|---------------|
|                             | Carbon monoxide (mg/stick)                                                                                                                                                                                                                                                                                                                                                                                                                                                                                                                                                                                                                                                                                                                                                                                                                                                                                                                                                                                                                                                                                                                                        | NQ (0.223)    | NQ (0.223)    | 32.0 ± 1.0  | 0.305 ± 0.017 |
|                             | Crotonaldehyde (µg/stick)                                                                                                                                                                                                                                                                                                                                                                                                                                                                                                                                                                                                                                                                                                                                                                                                                                                                                                                                                                                                                                                                                                                                         | 0.567 ± 0.232 | 0.768 ± 0.321 | 42.0 ± 6.2  | 2.00 ± 0.40   |
|                             | Formaldehyde (µg/stick)                                                                                                                                                                                                                                                                                                                                                                                                                                                                                                                                                                                                                                                                                                                                                                                                                                                                                                                                                                                                                                                                                                                                           | 3.29 ± 0.30   | 3.51 ± 0.54   | 54.1 ± 6.0  | 5.93 ± 0.87   |
|                             | Isoprene (µg/stick)                                                                                                                                                                                                                                                                                                                                                                                                                                                                                                                                                                                                                                                                                                                                                                                                                                                                                                                                                                                                                                                                                                                                               | NQ (0.135)    | NQ (0.135)    | 887 ± 49    | 1.55 ± 0.20   |
|                             | NNN (ng/stick)                                                                                                                                                                                                                                                                                                                                                                                                                                                                                                                                                                                                                                                                                                                                                                                                                                                                                                                                                                                                                                                                                                                                                    | 24.7 ± 2.5    | 19.1 ± 2.2    | 263 ± 12    | 11.5 ± 0.8    |
|                             | NNK (ng/stick)                                                                                                                                                                                                                                                                                                                                                                                                                                                                                                                                                                                                                                                                                                                                                                                                                                                                                                                                                                                                                                                                                                                                                    | 6.61 ± 0.86   | 5.32 ± 0.89   | 281 ± 16    | 10.6 ± 0.2    |
|                             | Toluene(µg/stick)                                                                                                                                                                                                                                                                                                                                                                                                                                                                                                                                                                                                                                                                                                                                                                                                                                                                                                                                                                                                                                                                                                                                                 | NQ (0.204)    | NQ (0.204)    | 131 ± 5     | 1.33 ± 0.11   |
|                             | Nicotine (mg/stick)                                                                                                                                                                                                                                                                                                                                                                                                                                                                                                                                                                                                                                                                                                                                                                                                                                                                                                                                                                                                                                                                                                                                               | 0.462 ± 0.037 | 0.365 ± 0.021 | 2.02 ± 0.08 | 1.16 ± 0.03   |
|                             | Water (mg/stick)                                                                                                                                                                                                                                                                                                                                                                                                                                                                                                                                                                                                                                                                                                                                                                                                                                                                                                                                                                                                                                                                                                                                                  | 12.1 ± 1.1    | 10.7 ± 0.9    | 15.1 ± 1.4  | 25.4 ± 2.0    |
|                             | Glycerol (mg/stick)                                                                                                                                                                                                                                                                                                                                                                                                                                                                                                                                                                                                                                                                                                                                                                                                                                                                                                                                                                                                                                                                                                                                               | 3.02 ± 0.26   | 2.38 ± 0.21   | 2.35 ± 0.05 | 4.28 ± 0.08   |
|                             | Total particulate matter (mg/stick)                                                                                                                                                                                                                                                                                                                                                                                                                                                                                                                                                                                                                                                                                                                                                                                                                                                                                                                                                                                                                                                                                                                               | 26.1 ± 1.1    | 25.3 ± 1.4    | 46.9 ± 2.8  | 48.9 ± 0.7    |
|                             | Nicotine-free dry particulate matter (mg/stick)                                                                                                                                                                                                                                                                                                                                                                                                                                                                                                                                                                                                                                                                                                                                                                                                                                                                                                                                                                                                                                                                                                                   | 13.6 ± 1.2    | 14.2 ± 1.3    | 29.8 ± 1.4  | 22.3 ± 2.2    |
| <b>Authors' conclusions</b> | <ul style="list-style-type: none"> <li>The levels of HPHC in the mainstream aerosol from glo were significantly reduced in comparison to the HPHC levels in smoke of a reference cigarette</li> <li>The HPHC levels of the glo aerosol were similar to IQOS aerosol composition</li> </ul>                                                                                                                                                                                                                                                                                                                                                                                                                                                                                                                                                                                                                                                                                                                                                                                                                                                                        |               |               |             |               |
| <b>Authors, study year</b>  | Forster et al., 2017 [25]                                                                                                                                                                                                                                                                                                                                                                                                                                                                                                                                                                                                                                                                                                                                                                                                                                                                                                                                                                                                                                                                                                                                         |               |               |             |               |
| <b>Funder/Affiliations</b>  | <b>Affiliations:</b> Research and Development, British American Tobacco Investments Ltd, Regents Park Road, Southampton, Hampshire SO15 8TL, UK                                                                                                                                                                                                                                                                                                                                                                                                                                                                                                                                                                                                                                                                                                                                                                                                                                                                                                                                                                                                                   |               |               |             |               |
| <b>Primary aim</b>          | To compare levels of secondhand smoke/emissions                                                                                                                                                                                                                                                                                                                                                                                                                                                                                                                                                                                                                                                                                                                                                                                                                                                                                                                                                                                                                                                                                                                   |               |               |             |               |
| <b>Products used</b>        | <ul style="list-style-type: none"> <li>Glo/THP 1.0 with regular tobacco sticks (Bright tobacco Kent Neostick)</li> <li>Cigarette: Lucky Strike regular cigarette (ISO tar yield 7 mg) and Du Maurier Silver cigarette (ISO tar yield 9 mg)</li> </ul>                                                                                                                                                                                                                                                                                                                                                                                                                                                                                                                                                                                                                                                                                                                                                                                                                                                                                                             |               |               |             |               |
| <b>Methods</b>              | <b>Design:</b> Laboratory comparison study using smoking machines<br><b>Study time and setting:</b> United Kingdom, time not reported<br><b>Measures:</b> During the tests, the parameters of CO <sub>2</sub> , CO, NO <sub>x</sub> , ozone (O <sub>3</sub> ) and particulate matter by size (diameter PM <sub>1</sub> = ≤ 1 µm, PM <sub>2.5</sub> = 2.5 µm, and PM <sub>10</sub> = 10 µm) in the test room were measured continuously every 60 seconds. In addition, PM <sub>1</sub> , PM <sub>2.5</sub> , PM <sub>10</sub> , NO <sub>x</sub> and O <sub>3</sub> were monitored outside the test room building. The following air constituents were sampled continuously over the total 4 hours of the test inside the test room: individual and total volatile organic compounds; low-molecular-weight carbonyl compounds (formaldehyde, acetaldehyde, acrolein and crotonaldehyde); polycyclic aromatic hydrocarbons (PAHs); nicotine; glycerol; 3-ethenyl pyridine (3-EP); and tobacco specific nitrosamines (TSNAs). Particle size, mass and number concentration were also measured continuously every 10 seconds with an electrical-mobility spectrometer. |               |               |             |               |
| <b>Participants</b>         | Adult cigarette smokers (minimum age 22 years; minimum daily cigarette consumption six cigarettes) who had smoked for at least                                                                                                                                                                                                                                                                                                                                                                                                                                                                                                                                                                                                                                                                                                                                                                                                                                                                                                                                                                                                                                    |               |               |             |               |

|                                                                      | 18 months were recruited by a specialist agency. Four participants were present in the test room at any time, along with an independent non-smoking moderator.                                                                                                                                                                                                                                                                                                                                                                                                                                                                                                                                                                                                                                                                                                                                                                                                                                                                                                                                                                                                                                                                                                                                                                                                                                                                                                                                                                                                                                                                                                                                                                                                                                                                                                                                                                                                                                                                                                                                                                                                                                                                                                                                                                                                                                                                                                                                                                                                                          |                        |                       |                      |                   |                                                   |                       |                       |                       |                                              |    |     |     |                                                   |                       |                       |                       |                                             |   |    |    |                                             |   |    |    |                                                      |                       |                       |                       |                                                |                       |                       |                       |                                                                      |    |     |     |                                                  |      |      |      |                                                  |    |     |     |                                              |                       |                       |                       |                                                    |                       |                       |                       |                                              |     |      |      |                                                        |                       |     |     |                                              |                       |                       |                       |
|----------------------------------------------------------------------|-----------------------------------------------------------------------------------------------------------------------------------------------------------------------------------------------------------------------------------------------------------------------------------------------------------------------------------------------------------------------------------------------------------------------------------------------------------------------------------------------------------------------------------------------------------------------------------------------------------------------------------------------------------------------------------------------------------------------------------------------------------------------------------------------------------------------------------------------------------------------------------------------------------------------------------------------------------------------------------------------------------------------------------------------------------------------------------------------------------------------------------------------------------------------------------------------------------------------------------------------------------------------------------------------------------------------------------------------------------------------------------------------------------------------------------------------------------------------------------------------------------------------------------------------------------------------------------------------------------------------------------------------------------------------------------------------------------------------------------------------------------------------------------------------------------------------------------------------------------------------------------------------------------------------------------------------------------------------------------------------------------------------------------------------------------------------------------------------------------------------------------------------------------------------------------------------------------------------------------------------------------------------------------------------------------------------------------------------------------------------------------------------------------------------------------------------------------------------------------------------------------------------------------------------------------------------------------------|------------------------|-----------------------|----------------------|-------------------|---------------------------------------------------|-----------------------|-----------------------|-----------------------|----------------------------------------------|----|-----|-----|---------------------------------------------------|-----------------------|-----------------------|-----------------------|---------------------------------------------|---|----|----|---------------------------------------------|---|----|----|------------------------------------------------------|-----------------------|-----------------------|-----------------------|------------------------------------------------|-----------------------|-----------------------|-----------------------|----------------------------------------------------------------------|----|-----|-----|--------------------------------------------------|------|------|------|--------------------------------------------------|----|-----|-----|----------------------------------------------|-----------------------|-----------------------|-----------------------|----------------------------------------------------|-----------------------|-----------------------|-----------------------|----------------------------------------------|-----|------|------|--------------------------------------------------------|-----------------------|-----|-----|----------------------------------------------|-----------------------|-----------------------|-----------------------|
| <b>Interventions/Exposure</b>                                        | <p>Prior to the tests, no smoking or vaping had previously taken place in the test room, which had been maintained under natural ventilation conditions (i.e., no air conditioning or openable windows).</p> <p>Glo and the Lucky Strike Regular reference cigarette were tested in duplicate at all three ventilation conditions; the Du Maurier Silver cigarette was tested only at the lowest 1.2 air changes per hour ventilation (i.e., the highest-concentration condition). Five test situations, each with a 4 hours sampling period, were conducted per week in three stages, corresponding to the three ventilation conditions. Cigarettes were always smoked last in the week to minimise carryover contamination, and the room ventilation continued to operate overnight and at weekends to flush out potential residual contaminants. Smokers were asked to take a puff once every 30 s for 8 puffs. All product use was completed while volunteers sat in the chairs provided. At other times, the volunteers were free to leave their chairs, but they were asked to not stand in the direct vicinity of the monitoring equipment in order to keep environmental interference to a minimum.</p>                                                                                                                                                                                                                                                                                                                                                                                                                                                                                                                                                                                                                                                                                                                                                                                                                                                                                                                                                                                                                                                                                                                                                                                                                                                                                                                                                                         |                        |                       |                      |                   |                                                   |                       |                       |                       |                                              |    |     |     |                                                   |                       |                       |                       |                                             |   |    |    |                                             |   |    |    |                                                      |                       |                       |                       |                                                |                       |                       |                       |                                                                      |    |     |     |                                                  |      |      |      |                                                  |    |     |     |                                              |                       |                       |                       |                                                    |                       |                       |                       |                                              |     |      |      |                                                        |                       |     |     |                                              |                       |                       |                       |
| <b>Outcome/Key findings</b>                                          | <p><b>HPHC levels in secondhand emissions of glo, Lucky Strike Regular &amp; Du Maurier Silver cigarettes in 'Home'* condition (1.2 air changes per hour)</b></p> <table border="1"> <thead> <tr> <th>Constituent in the air</th> <th>glo</th> <th>Lucky Strike Regular</th> <th>Du Maurier Silver</th> </tr> </thead> <tbody> <tr> <td>1,3-Butadiene (<math>\mu\text{g}\cdot\text{m}^{-3}</math>)</td> <td>Below detection limit</td> <td>Below detection limit</td> <td>Below detection limit</td> </tr> <tr> <td>Isoprene (<math>\mu\text{g}\cdot\text{m}^{-3}</math>)</td> <td>16</td> <td>191</td> <td>255</td> </tr> <tr> <td>Acrylonitrile (<math>\mu\text{g}\cdot\text{m}^{-3}</math>)</td> <td>Below detection limit</td> <td>Below detection limit</td> <td>Below detection limit</td> </tr> <tr> <td>Benzene (<math>\mu\text{g}\cdot\text{m}^{-3}</math>)</td> <td>1</td> <td>16</td> <td>21</td> </tr> <tr> <td>Toluene (<math>\mu\text{g}\cdot\text{m}^{-3}</math>)</td> <td>3</td> <td>29</td> <td>32</td> </tr> <tr> <td>Propylene glycol (<math>\mu\text{g}\cdot\text{m}^{-3}</math>)</td> <td>Below detection limit</td> <td>Below detection limit</td> <td>Below detection limit</td> </tr> <tr> <td>Acrylamide (<math>\mu\text{g}\cdot\text{m}^{-3}</math>)</td> <td>Below detection limit</td> <td>Below detection limit</td> <td>Below detection limit</td> </tr> <tr> <td>Total volatile organic compounds (<math>\mu\text{g}\cdot\text{m}^{-3}</math>)</td> <td>49</td> <td>373</td> <td>362</td> </tr> <tr> <td>Formaldehyde (<math>\mu\text{g}\cdot\text{m}^{-3}</math>)</td> <td>17.5</td> <td>33.3</td> <td>43.0</td> </tr> <tr> <td>Acetaldehyde (<math>\mu\text{g}\cdot\text{m}^{-3}</math>)</td> <td>10</td> <td>100</td> <td>118</td> </tr> <tr> <td>Acrolein (<math>\mu\text{g}\cdot\text{m}^{-3}</math>)</td> <td>Below detection limit</td> <td>Below detection limit</td> <td>Below detection limit</td> </tr> <tr> <td>Crotonaldehyde (<math>\mu\text{g}\cdot\text{m}^{-3}</math>)</td> <td>Below detection limit</td> <td>Below detection limit</td> <td>Below detection limit</td> </tr> <tr> <td>Nicotine (<math>\mu\text{g}\cdot\text{m}^{-3}</math>)</td> <td>0.3</td> <td>47.0</td> <td>33.0</td> </tr> <tr> <td>3-ethenyl pyridine (<math>\mu\text{g}\cdot\text{m}^{-3}</math>)</td> <td>Below detection limit</td> <td>9.1</td> <td>7.8</td> </tr> <tr> <td>Glycerol (<math>\mu\text{g}\cdot\text{m}^{-3}</math>)</td> <td>Below detection limit</td> <td>Below detection limit</td> <td>Below detection limit</td> </tr> </tbody> </table> | Constituent in the air | glo                   | Lucky Strike Regular | Du Maurier Silver | 1,3-Butadiene ( $\mu\text{g}\cdot\text{m}^{-3}$ ) | Below detection limit | Below detection limit | Below detection limit | Isoprene ( $\mu\text{g}\cdot\text{m}^{-3}$ ) | 16 | 191 | 255 | Acrylonitrile ( $\mu\text{g}\cdot\text{m}^{-3}$ ) | Below detection limit | Below detection limit | Below detection limit | Benzene ( $\mu\text{g}\cdot\text{m}^{-3}$ ) | 1 | 16 | 21 | Toluene ( $\mu\text{g}\cdot\text{m}^{-3}$ ) | 3 | 29 | 32 | Propylene glycol ( $\mu\text{g}\cdot\text{m}^{-3}$ ) | Below detection limit | Below detection limit | Below detection limit | Acrylamide ( $\mu\text{g}\cdot\text{m}^{-3}$ ) | Below detection limit | Below detection limit | Below detection limit | Total volatile organic compounds ( $\mu\text{g}\cdot\text{m}^{-3}$ ) | 49 | 373 | 362 | Formaldehyde ( $\mu\text{g}\cdot\text{m}^{-3}$ ) | 17.5 | 33.3 | 43.0 | Acetaldehyde ( $\mu\text{g}\cdot\text{m}^{-3}$ ) | 10 | 100 | 118 | Acrolein ( $\mu\text{g}\cdot\text{m}^{-3}$ ) | Below detection limit | Below detection limit | Below detection limit | Crotonaldehyde ( $\mu\text{g}\cdot\text{m}^{-3}$ ) | Below detection limit | Below detection limit | Below detection limit | Nicotine ( $\mu\text{g}\cdot\text{m}^{-3}$ ) | 0.3 | 47.0 | 33.0 | 3-ethenyl pyridine ( $\mu\text{g}\cdot\text{m}^{-3}$ ) | Below detection limit | 9.1 | 7.8 | Glycerol ( $\mu\text{g}\cdot\text{m}^{-3}$ ) | Below detection limit | Below detection limit | Below detection limit |
| Constituent in the air                                               | glo                                                                                                                                                                                                                                                                                                                                                                                                                                                                                                                                                                                                                                                                                                                                                                                                                                                                                                                                                                                                                                                                                                                                                                                                                                                                                                                                                                                                                                                                                                                                                                                                                                                                                                                                                                                                                                                                                                                                                                                                                                                                                                                                                                                                                                                                                                                                                                                                                                                                                                                                                                                     | Lucky Strike Regular   | Du Maurier Silver     |                      |                   |                                                   |                       |                       |                       |                                              |    |     |     |                                                   |                       |                       |                       |                                             |   |    |    |                                             |   |    |    |                                                      |                       |                       |                       |                                                |                       |                       |                       |                                                                      |    |     |     |                                                  |      |      |      |                                                  |    |     |     |                                              |                       |                       |                       |                                                    |                       |                       |                       |                                              |     |      |      |                                                        |                       |     |     |                                              |                       |                       |                       |
| 1,3-Butadiene ( $\mu\text{g}\cdot\text{m}^{-3}$ )                    | Below detection limit                                                                                                                                                                                                                                                                                                                                                                                                                                                                                                                                                                                                                                                                                                                                                                                                                                                                                                                                                                                                                                                                                                                                                                                                                                                                                                                                                                                                                                                                                                                                                                                                                                                                                                                                                                                                                                                                                                                                                                                                                                                                                                                                                                                                                                                                                                                                                                                                                                                                                                                                                                   | Below detection limit  | Below detection limit |                      |                   |                                                   |                       |                       |                       |                                              |    |     |     |                                                   |                       |                       |                       |                                             |   |    |    |                                             |   |    |    |                                                      |                       |                       |                       |                                                |                       |                       |                       |                                                                      |    |     |     |                                                  |      |      |      |                                                  |    |     |     |                                              |                       |                       |                       |                                                    |                       |                       |                       |                                              |     |      |      |                                                        |                       |     |     |                                              |                       |                       |                       |
| Isoprene ( $\mu\text{g}\cdot\text{m}^{-3}$ )                         | 16                                                                                                                                                                                                                                                                                                                                                                                                                                                                                                                                                                                                                                                                                                                                                                                                                                                                                                                                                                                                                                                                                                                                                                                                                                                                                                                                                                                                                                                                                                                                                                                                                                                                                                                                                                                                                                                                                                                                                                                                                                                                                                                                                                                                                                                                                                                                                                                                                                                                                                                                                                                      | 191                    | 255                   |                      |                   |                                                   |                       |                       |                       |                                              |    |     |     |                                                   |                       |                       |                       |                                             |   |    |    |                                             |   |    |    |                                                      |                       |                       |                       |                                                |                       |                       |                       |                                                                      |    |     |     |                                                  |      |      |      |                                                  |    |     |     |                                              |                       |                       |                       |                                                    |                       |                       |                       |                                              |     |      |      |                                                        |                       |     |     |                                              |                       |                       |                       |
| Acrylonitrile ( $\mu\text{g}\cdot\text{m}^{-3}$ )                    | Below detection limit                                                                                                                                                                                                                                                                                                                                                                                                                                                                                                                                                                                                                                                                                                                                                                                                                                                                                                                                                                                                                                                                                                                                                                                                                                                                                                                                                                                                                                                                                                                                                                                                                                                                                                                                                                                                                                                                                                                                                                                                                                                                                                                                                                                                                                                                                                                                                                                                                                                                                                                                                                   | Below detection limit  | Below detection limit |                      |                   |                                                   |                       |                       |                       |                                              |    |     |     |                                                   |                       |                       |                       |                                             |   |    |    |                                             |   |    |    |                                                      |                       |                       |                       |                                                |                       |                       |                       |                                                                      |    |     |     |                                                  |      |      |      |                                                  |    |     |     |                                              |                       |                       |                       |                                                    |                       |                       |                       |                                              |     |      |      |                                                        |                       |     |     |                                              |                       |                       |                       |
| Benzene ( $\mu\text{g}\cdot\text{m}^{-3}$ )                          | 1                                                                                                                                                                                                                                                                                                                                                                                                                                                                                                                                                                                                                                                                                                                                                                                                                                                                                                                                                                                                                                                                                                                                                                                                                                                                                                                                                                                                                                                                                                                                                                                                                                                                                                                                                                                                                                                                                                                                                                                                                                                                                                                                                                                                                                                                                                                                                                                                                                                                                                                                                                                       | 16                     | 21                    |                      |                   |                                                   |                       |                       |                       |                                              |    |     |     |                                                   |                       |                       |                       |                                             |   |    |    |                                             |   |    |    |                                                      |                       |                       |                       |                                                |                       |                       |                       |                                                                      |    |     |     |                                                  |      |      |      |                                                  |    |     |     |                                              |                       |                       |                       |                                                    |                       |                       |                       |                                              |     |      |      |                                                        |                       |     |     |                                              |                       |                       |                       |
| Toluene ( $\mu\text{g}\cdot\text{m}^{-3}$ )                          | 3                                                                                                                                                                                                                                                                                                                                                                                                                                                                                                                                                                                                                                                                                                                                                                                                                                                                                                                                                                                                                                                                                                                                                                                                                                                                                                                                                                                                                                                                                                                                                                                                                                                                                                                                                                                                                                                                                                                                                                                                                                                                                                                                                                                                                                                                                                                                                                                                                                                                                                                                                                                       | 29                     | 32                    |                      |                   |                                                   |                       |                       |                       |                                              |    |     |     |                                                   |                       |                       |                       |                                             |   |    |    |                                             |   |    |    |                                                      |                       |                       |                       |                                                |                       |                       |                       |                                                                      |    |     |     |                                                  |      |      |      |                                                  |    |     |     |                                              |                       |                       |                       |                                                    |                       |                       |                       |                                              |     |      |      |                                                        |                       |     |     |                                              |                       |                       |                       |
| Propylene glycol ( $\mu\text{g}\cdot\text{m}^{-3}$ )                 | Below detection limit                                                                                                                                                                                                                                                                                                                                                                                                                                                                                                                                                                                                                                                                                                                                                                                                                                                                                                                                                                                                                                                                                                                                                                                                                                                                                                                                                                                                                                                                                                                                                                                                                                                                                                                                                                                                                                                                                                                                                                                                                                                                                                                                                                                                                                                                                                                                                                                                                                                                                                                                                                   | Below detection limit  | Below detection limit |                      |                   |                                                   |                       |                       |                       |                                              |    |     |     |                                                   |                       |                       |                       |                                             |   |    |    |                                             |   |    |    |                                                      |                       |                       |                       |                                                |                       |                       |                       |                                                                      |    |     |     |                                                  |      |      |      |                                                  |    |     |     |                                              |                       |                       |                       |                                                    |                       |                       |                       |                                              |     |      |      |                                                        |                       |     |     |                                              |                       |                       |                       |
| Acrylamide ( $\mu\text{g}\cdot\text{m}^{-3}$ )                       | Below detection limit                                                                                                                                                                                                                                                                                                                                                                                                                                                                                                                                                                                                                                                                                                                                                                                                                                                                                                                                                                                                                                                                                                                                                                                                                                                                                                                                                                                                                                                                                                                                                                                                                                                                                                                                                                                                                                                                                                                                                                                                                                                                                                                                                                                                                                                                                                                                                                                                                                                                                                                                                                   | Below detection limit  | Below detection limit |                      |                   |                                                   |                       |                       |                       |                                              |    |     |     |                                                   |                       |                       |                       |                                             |   |    |    |                                             |   |    |    |                                                      |                       |                       |                       |                                                |                       |                       |                       |                                                                      |    |     |     |                                                  |      |      |      |                                                  |    |     |     |                                              |                       |                       |                       |                                                    |                       |                       |                       |                                              |     |      |      |                                                        |                       |     |     |                                              |                       |                       |                       |
| Total volatile organic compounds ( $\mu\text{g}\cdot\text{m}^{-3}$ ) | 49                                                                                                                                                                                                                                                                                                                                                                                                                                                                                                                                                                                                                                                                                                                                                                                                                                                                                                                                                                                                                                                                                                                                                                                                                                                                                                                                                                                                                                                                                                                                                                                                                                                                                                                                                                                                                                                                                                                                                                                                                                                                                                                                                                                                                                                                                                                                                                                                                                                                                                                                                                                      | 373                    | 362                   |                      |                   |                                                   |                       |                       |                       |                                              |    |     |     |                                                   |                       |                       |                       |                                             |   |    |    |                                             |   |    |    |                                                      |                       |                       |                       |                                                |                       |                       |                       |                                                                      |    |     |     |                                                  |      |      |      |                                                  |    |     |     |                                              |                       |                       |                       |                                                    |                       |                       |                       |                                              |     |      |      |                                                        |                       |     |     |                                              |                       |                       |                       |
| Formaldehyde ( $\mu\text{g}\cdot\text{m}^{-3}$ )                     | 17.5                                                                                                                                                                                                                                                                                                                                                                                                                                                                                                                                                                                                                                                                                                                                                                                                                                                                                                                                                                                                                                                                                                                                                                                                                                                                                                                                                                                                                                                                                                                                                                                                                                                                                                                                                                                                                                                                                                                                                                                                                                                                                                                                                                                                                                                                                                                                                                                                                                                                                                                                                                                    | 33.3                   | 43.0                  |                      |                   |                                                   |                       |                       |                       |                                              |    |     |     |                                                   |                       |                       |                       |                                             |   |    |    |                                             |   |    |    |                                                      |                       |                       |                       |                                                |                       |                       |                       |                                                                      |    |     |     |                                                  |      |      |      |                                                  |    |     |     |                                              |                       |                       |                       |                                                    |                       |                       |                       |                                              |     |      |      |                                                        |                       |     |     |                                              |                       |                       |                       |
| Acetaldehyde ( $\mu\text{g}\cdot\text{m}^{-3}$ )                     | 10                                                                                                                                                                                                                                                                                                                                                                                                                                                                                                                                                                                                                                                                                                                                                                                                                                                                                                                                                                                                                                                                                                                                                                                                                                                                                                                                                                                                                                                                                                                                                                                                                                                                                                                                                                                                                                                                                                                                                                                                                                                                                                                                                                                                                                                                                                                                                                                                                                                                                                                                                                                      | 100                    | 118                   |                      |                   |                                                   |                       |                       |                       |                                              |    |     |     |                                                   |                       |                       |                       |                                             |   |    |    |                                             |   |    |    |                                                      |                       |                       |                       |                                                |                       |                       |                       |                                                                      |    |     |     |                                                  |      |      |      |                                                  |    |     |     |                                              |                       |                       |                       |                                                    |                       |                       |                       |                                              |     |      |      |                                                        |                       |     |     |                                              |                       |                       |                       |
| Acrolein ( $\mu\text{g}\cdot\text{m}^{-3}$ )                         | Below detection limit                                                                                                                                                                                                                                                                                                                                                                                                                                                                                                                                                                                                                                                                                                                                                                                                                                                                                                                                                                                                                                                                                                                                                                                                                                                                                                                                                                                                                                                                                                                                                                                                                                                                                                                                                                                                                                                                                                                                                                                                                                                                                                                                                                                                                                                                                                                                                                                                                                                                                                                                                                   | Below detection limit  | Below detection limit |                      |                   |                                                   |                       |                       |                       |                                              |    |     |     |                                                   |                       |                       |                       |                                             |   |    |    |                                             |   |    |    |                                                      |                       |                       |                       |                                                |                       |                       |                       |                                                                      |    |     |     |                                                  |      |      |      |                                                  |    |     |     |                                              |                       |                       |                       |                                                    |                       |                       |                       |                                              |     |      |      |                                                        |                       |     |     |                                              |                       |                       |                       |
| Crotonaldehyde ( $\mu\text{g}\cdot\text{m}^{-3}$ )                   | Below detection limit                                                                                                                                                                                                                                                                                                                                                                                                                                                                                                                                                                                                                                                                                                                                                                                                                                                                                                                                                                                                                                                                                                                                                                                                                                                                                                                                                                                                                                                                                                                                                                                                                                                                                                                                                                                                                                                                                                                                                                                                                                                                                                                                                                                                                                                                                                                                                                                                                                                                                                                                                                   | Below detection limit  | Below detection limit |                      |                   |                                                   |                       |                       |                       |                                              |    |     |     |                                                   |                       |                       |                       |                                             |   |    |    |                                             |   |    |    |                                                      |                       |                       |                       |                                                |                       |                       |                       |                                                                      |    |     |     |                                                  |      |      |      |                                                  |    |     |     |                                              |                       |                       |                       |                                                    |                       |                       |                       |                                              |     |      |      |                                                        |                       |     |     |                                              |                       |                       |                       |
| Nicotine ( $\mu\text{g}\cdot\text{m}^{-3}$ )                         | 0.3                                                                                                                                                                                                                                                                                                                                                                                                                                                                                                                                                                                                                                                                                                                                                                                                                                                                                                                                                                                                                                                                                                                                                                                                                                                                                                                                                                                                                                                                                                                                                                                                                                                                                                                                                                                                                                                                                                                                                                                                                                                                                                                                                                                                                                                                                                                                                                                                                                                                                                                                                                                     | 47.0                   | 33.0                  |                      |                   |                                                   |                       |                       |                       |                                              |    |     |     |                                                   |                       |                       |                       |                                             |   |    |    |                                             |   |    |    |                                                      |                       |                       |                       |                                                |                       |                       |                       |                                                                      |    |     |     |                                                  |      |      |      |                                                  |    |     |     |                                              |                       |                       |                       |                                                    |                       |                       |                       |                                              |     |      |      |                                                        |                       |     |     |                                              |                       |                       |                       |
| 3-ethenyl pyridine ( $\mu\text{g}\cdot\text{m}^{-3}$ )               | Below detection limit                                                                                                                                                                                                                                                                                                                                                                                                                                                                                                                                                                                                                                                                                                                                                                                                                                                                                                                                                                                                                                                                                                                                                                                                                                                                                                                                                                                                                                                                                                                                                                                                                                                                                                                                                                                                                                                                                                                                                                                                                                                                                                                                                                                                                                                                                                                                                                                                                                                                                                                                                                   | 9.1                    | 7.8                   |                      |                   |                                                   |                       |                       |                       |                                              |    |     |     |                                                   |                       |                       |                       |                                             |   |    |    |                                             |   |    |    |                                                      |                       |                       |                       |                                                |                       |                       |                       |                                                                      |    |     |     |                                                  |      |      |      |                                                  |    |     |     |                                              |                       |                       |                       |                                                    |                       |                       |                       |                                              |     |      |      |                                                        |                       |     |     |                                              |                       |                       |                       |
| Glycerol ( $\mu\text{g}\cdot\text{m}^{-3}$ )                         | Below detection limit                                                                                                                                                                                                                                                                                                                                                                                                                                                                                                                                                                                                                                                                                                                                                                                                                                                                                                                                                                                                                                                                                                                                                                                                                                                                                                                                                                                                                                                                                                                                                                                                                                                                                                                                                                                                                                                                                                                                                                                                                                                                                                                                                                                                                                                                                                                                                                                                                                                                                                                                                                   | Below detection limit  | Below detection limit |                      |                   |                                                   |                       |                       |                       |                                              |    |     |     |                                                   |                       |                       |                       |                                             |   |    |    |                                             |   |    |    |                                                      |                       |                       |                       |                                                |                       |                       |                       |                                                                      |    |     |     |                                                  |      |      |      |                                                  |    |     |     |                                              |                       |                       |                       |                                                    |                       |                       |                       |                                              |     |      |      |                                                        |                       |     |     |                                              |                       |                       |                       |

|                            |                                                                                                                                                                                                                                                                                                                                                                                                                                                                                                                                                                                                                                                                                                                                                                                                                                                                                                                                                                                                                                                                                                                                                                                                                                                                                          |
|----------------------------|------------------------------------------------------------------------------------------------------------------------------------------------------------------------------------------------------------------------------------------------------------------------------------------------------------------------------------------------------------------------------------------------------------------------------------------------------------------------------------------------------------------------------------------------------------------------------------------------------------------------------------------------------------------------------------------------------------------------------------------------------------------------------------------------------------------------------------------------------------------------------------------------------------------------------------------------------------------------------------------------------------------------------------------------------------------------------------------------------------------------------------------------------------------------------------------------------------------------------------------------------------------------------------------|
|                            | <p>Carbon monoxide (ppm)                      Below detection limit                      Below detection limit                      1.3</p> <p>NO (ppb)                                              4                                              30                                              22</p> <p>NO<sub>2</sub> (ppb)                                              8                                              12                                              11</p> <p>NO<sub>x</sub> (ppb)                                              12                                              42                                              33</p> <p>PM<sub>1</sub>                                              7.1                                              1392                                              1529</p> <p>PM<sub>2.5</sub>                                              7.4                                              1392                                              1536</p> <p>PM<sub>10</sub>                                              12.8                                              1398                                              1541</p> <p>* Results for simulated 'hospitality' and 'office' conditions were similar</p> |
| <b>Findings overview</b>   | <ul style="list-style-type: none"> <li>Glo emissions have a significantly lower impact on indoor air quality than conventional combustible cigarettes, driven by a significantly lower emissions profile of both aerosol particles and chemical emissions in respect of the HPHC measured</li> </ul>                                                                                                                                                                                                                                                                                                                                                                                                                                                                                                                                                                                                                                                                                                                                                                                                                                                                                                                                                                                     |
| <b>Authors, study year</b> | <b>Protano et al., 2017 [26]</b>                                                                                                                                                                                                                                                                                                                                                                                                                                                                                                                                                                                                                                                                                                                                                                                                                                                                                                                                                                                                                                                                                                                                                                                                                                                         |
| <b>Funder/Affiliations</b> | <p><b>Affiliations:</b></p> <ul style="list-style-type: none"> <li>Department of Public Health and Infectious Diseases, Sapienza University of Rome, Italy</li> <li>Department of Technological Innovations, INAIL, Rome, Italy</li> <li>Department of Agricultural, Environmental and Food Sciences, University of Molise, Italy</li> </ul>                                                                                                                                                                                                                                                                                                                                                                                                                                                                                                                                                                                                                                                                                                                                                                                                                                                                                                                                             |
| <b>Primary aim</b>         | To compare levels of secondhand smoke/emissions from real use of regular and hand-rolled cigarettes, pipes, cigars, e-cigarettes, and IQOS                                                                                                                                                                                                                                                                                                                                                                                                                                                                                                                                                                                                                                                                                                                                                                                                                                                                                                                                                                                                                                                                                                                                               |
| <b>Products used</b>       | <ul style="list-style-type: none"> <li>Cigarette: Pall Mall San Francisco (0.7 mg nicotine, 8 mg tar, and 9 mg carbon monoxide)</li> <li>Hand-rolled cigarette: Golden Virginia tobacco rolled with a Rizla Blue Regular rolling paper</li> <li>Cigar: Italian Toscanello</li> <li>Pipe: Amphora Original Blend tobacco</li> <li>IQOS: Marlboro Balance stick</li> <li>E-cigarette: pen-style Smooke E-Smart with Smooke Light e-liquid (9 mg ml of nicotine)</li> </ul>                                                                                                                                                                                                                                                                                                                                                                                                                                                                                                                                                                                                                                                                                                                                                                                                                 |
| <b>Methods</b>             | <p><b>Design:</b> Laboratory comparison study using smoking volunteers</p> <p><b>Study time and setting:</b> Italy, time not reported</p> <p><b>Measures:</b> Aerosol number-size distributions were measured by using a TSI Fast Mobility Particle Sizer (model 3091, FMPS, Shoreview, MN, USA). The instrument counts and classifies particles according to their electrical mobility in 32 size channels in the range of 5.6 to 560 nm with a temporal resolution of 1 s. FMPS operates at high flow rate (10 L min<sup>-1</sup>) to minimize diffusion losses and at ambient pressure to prevent the evaporation of volatile and semi-volatile particles.</p>                                                                                                                                                                                                                                                                                                                                                                                                                                                                                                                                                                                                                        |

|                               |                                                                                                                                                                                                                                                                                                                                                                                                                                                                                                                                                                                                                                                                                                                                                                                                                                                                                                                                                                                                                                                                                                                                                                                              |
|-------------------------------|----------------------------------------------------------------------------------------------------------------------------------------------------------------------------------------------------------------------------------------------------------------------------------------------------------------------------------------------------------------------------------------------------------------------------------------------------------------------------------------------------------------------------------------------------------------------------------------------------------------------------------------------------------------------------------------------------------------------------------------------------------------------------------------------------------------------------------------------------------------------------------------------------------------------------------------------------------------------------------------------------------------------------------------------------------------------------------------------------------------------------------------------------------------------------------------------|
| <b>Participants</b>           | Four volunteer smokers (three male, age range 37–60), employees of the Sapienza University Rome.                                                                                                                                                                                                                                                                                                                                                                                                                                                                                                                                                                                                                                                                                                                                                                                                                                                                                                                                                                                                                                                                                             |
| <b>Interventions/Exposure</b> | <p>Six sets of experiments (one for each smoking device) were carried out in triplicate; each experiment was based on one or more smoking sessions, which were performed by volunteers who were currently smokers in a 52.7m<sup>3</sup> test room with a door and window that were both closed.</p> <p>Three smoking sessions at 1-h time intervals for each smoking device (conventional cigarette, hand-rolled cigarette, e-cig and IQOS) were performed. During each session, a single cigarette or IQOS stick was smoked. For the e-cigarette, 12 puffs per session were taken. Since cigars and tobacco pipes are typically smoked differently than cigarettes, they were smoked in a single smoking session until the cigar or pipe tobacco was finished, which resulted in longer time intervals than for the other devices (approximately 30 and 45 min, respectively).</p> <p>For each type of smoking device, aerosol measurement started 5 min before the first smoking session and lasted 200 min in order to follow the aerosol concentration decay. Before changing the smoking device, the door and window were opened to allow the atmosphere of the room to rebalance.</p> |
| <b>Outcome/Key findings</b>   | <ul style="list-style-type: none"> <li>• A one hour period after each smoking session of conventional and hand-rolled cigarettes was not enough for the particle concentration to decrease to the background level</li> <li>• Particle emissions from the e-cigarettes were lower than from IQOS but e-cigarettes produces higher peak values for particle emissions compared to IQOS</li> </ul>                                                                                                                                                                                                                                                                                                                                                                                                                                                                                                                                                                                                                                                                                                                                                                                             |
| <b>Findings overview</b>      | <ul style="list-style-type: none"> <li>• The tested e-cigarette and IQOS devices emitted submicronic particles during their use, which supports the ban of ‘electronic’ nicotine delivery devices indoors</li> </ul>                                                                                                                                                                                                                                                                                                                                                                                                                                                                                                                                                                                                                                                                                                                                                                                                                                                                                                                                                                         |
|                               |                                                                                                                                                                                                                                                                                                                                                                                                                                                                                                                                                                                                                                                                                                                                                                                                                                                                                                                                                                                                                                                                                                                                                                                              |
| <b>Authors, study year</b>    | <b>Jaccard et al., 2017</b> [27]                                                                                                                                                                                                                                                                                                                                                                                                                                                                                                                                                                                                                                                                                                                                                                                                                                                                                                                                                                                                                                                                                                                                                             |
| <b>Funder/Affiliations</b>    | <b>Affiliations:</b> Philip Morris International R&D, Philip Morris Products SA, Rue des Usines 56, CH-2000 Neuchatel, Switzerland                                                                                                                                                                                                                                                                                                                                                                                                                                                                                                                                                                                                                                                                                                                                                                                                                                                                                                                                                                                                                                                           |
| <b>Primary aim</b>            | To compare levels of HPHC in mainstream IQOS emissions with those in mainstream cigarette smoke                                                                                                                                                                                                                                                                                                                                                                                                                                                                                                                                                                                                                                                                                                                                                                                                                                                                                                                                                                                                                                                                                              |
| <b>Products used</b>          | <ul style="list-style-type: none"> <li>• Reference cigarette 3R4F (ISO tar yield 9.4 mg/cigarette in 9 puffs)</li> <li>• IQOS/THS 2.2 with regular tobacco sticks</li> <li>• Commercial cigarettes samples obtained from South Korea, Germany, Russia, Japan, Australia and EU countries</li> </ul>                                                                                                                                                                                                                                                                                                                                                                                                                                                                                                                                                                                                                                                                                                                                                                                                                                                                                          |
| <b>Methods</b>                | <p><b>Design:</b> Laboratory comparison study using smoking machines</p> <p><b>Study time and setting:</b> not reported</p>                                                                                                                                                                                                                                                                                                                                                                                                                                                                                                                                                                                                                                                                                                                                                                                                                                                                                                                                                                                                                                                                  |

|                                                 | <b>Measures:</b> yields of HPHC in the mainstream aerosol from the IQOS tobacco sticks are compared to yields of HPHC in the mainstream smoke from the standardised reference cigarette 3R4F and commercially available cigarettes                                                                                                                                                                                                                                                                                                                                                                                                                                                                                                                                                                                                                                                                                                                                                                                                                                                                                                                                                                                                                                                                                                                                                                                                                                                                                                                                                                                                                                                                                                                                                                                                                                                                                                                                                                                                                                                                                                                                                                |                  |              |                |           |           |                          |                |            |                               |                 |             |                               |                  |             |                            |                  |              |                         |            |            |                     |              |            |                          |                |             |                    |             |             |                    |                |             |                           |                |          |                            |                |             |                           |       |             |                         |              |             |                     |              |            |                |              |            |                |              |            |                   |              |            |                     |               |              |                  |              |              |                     |              |              |                                     |              |              |                                                 |              |              |
|-------------------------------------------------|---------------------------------------------------------------------------------------------------------------------------------------------------------------------------------------------------------------------------------------------------------------------------------------------------------------------------------------------------------------------------------------------------------------------------------------------------------------------------------------------------------------------------------------------------------------------------------------------------------------------------------------------------------------------------------------------------------------------------------------------------------------------------------------------------------------------------------------------------------------------------------------------------------------------------------------------------------------------------------------------------------------------------------------------------------------------------------------------------------------------------------------------------------------------------------------------------------------------------------------------------------------------------------------------------------------------------------------------------------------------------------------------------------------------------------------------------------------------------------------------------------------------------------------------------------------------------------------------------------------------------------------------------------------------------------------------------------------------------------------------------------------------------------------------------------------------------------------------------------------------------------------------------------------------------------------------------------------------------------------------------------------------------------------------------------------------------------------------------------------------------------------------------------------------------------------------------|------------------|--------------|----------------|-----------|-----------|--------------------------|----------------|------------|-------------------------------|-----------------|-------------|-------------------------------|------------------|-------------|----------------------------|------------------|--------------|-------------------------|------------|------------|---------------------|--------------|------------|--------------------------|----------------|-------------|--------------------|-------------|-------------|--------------------|----------------|-------------|---------------------------|----------------|----------|----------------------------|----------------|-------------|---------------------------|-------|-------------|-------------------------|--------------|-------------|---------------------|--------------|------------|----------------|--------------|------------|----------------|--------------|------------|-------------------|--------------|------------|---------------------|---------------|--------------|------------------|--------------|--------------|---------------------|--------------|--------------|-------------------------------------|--------------|--------------|-------------------------------------------------|--------------|--------------|
| <b>Participants</b>                             | Not reported                                                                                                                                                                                                                                                                                                                                                                                                                                                                                                                                                                                                                                                                                                                                                                                                                                                                                                                                                                                                                                                                                                                                                                                                                                                                                                                                                                                                                                                                                                                                                                                                                                                                                                                                                                                                                                                                                                                                                                                                                                                                                                                                                                                      |                  |              |                |           |           |                          |                |            |                               |                 |             |                               |                  |             |                            |                  |              |                         |            |            |                     |              |            |                          |                |             |                    |             |             |                    |                |             |                           |                |          |                            |                |             |                           |       |             |                         |              |             |                     |              |            |                |              |            |                |              |            |                   |              |            |                     |               |              |                  |              |              |                     |              |              |                                     |              |              |                                                 |              |              |
| <b>Interventions/Exposure</b>                   | For IQOS, reference cigarettes, and commercial cigarettes all analyses were performed according to the official Health Canada methods                                                                                                                                                                                                                                                                                                                                                                                                                                                                                                                                                                                                                                                                                                                                                                                                                                                                                                                                                                                                                                                                                                                                                                                                                                                                                                                                                                                                                                                                                                                                                                                                                                                                                                                                                                                                                                                                                                                                                                                                                                                             |                  |              |                |           |           |                          |                |            |                               |                 |             |                               |                  |             |                            |                  |              |                         |            |            |                     |              |            |                          |                |             |                    |             |             |                    |                |             |                           |                |          |                            |                |             |                           |       |             |                         |              |             |                     |              |            |                |              |            |                |              |            |                   |              |            |                     |               |              |                  |              |              |                     |              |              |                                     |              |              |                                                 |              |              |
| <b>Outcome/Key findings</b>                     | <b>Yields of HPHC in the mainstream emissions of IQOS regular tobacco sticks and 3R4F reference cigarette</b>                                                                                                                                                                                                                                                                                                                                                                                                                                                                                                                                                                                                                                                                                                                                                                                                                                                                                                                                                                                                                                                                                                                                                                                                                                                                                                                                                                                                                                                                                                                                                                                                                                                                                                                                                                                                                                                                                                                                                                                                                                                                                     |                  |              |                |           |           |                          |                |            |                               |                 |             |                               |                  |             |                            |                  |              |                         |            |            |                     |              |            |                          |                |             |                    |             |             |                    |                |             |                           |                |          |                            |                |             |                           |       |             |                         |              |             |                     |              |            |                |              |            |                |              |            |                   |              |            |                     |               |              |                  |              |              |                     |              |              |                                     |              |              |                                                 |              |              |
|                                                 | <table border="1"> <thead> <tr> <th rowspan="2">HPHC</th> <th>IQOS</th> <th>3R4F cigarette</th> </tr> <tr> <th>Mean ± SD</th> <th>Mean ± SD</th> </tr> </thead> <tbody> <tr> <td>1,3-Butadiene (µg/stick)</td> <td>0.342 ± 0.0347</td> <td>98.5 ± 9.8</td> </tr> <tr> <td>1-Aminonaphthalene (ng/stick)</td> <td>0.0407 ± 0.0103</td> <td>21.6 ± 2.28</td> </tr> <tr> <td>2-Aminonaphthalene (ng/stick)</td> <td>0.0277 ± 0.00909</td> <td>16.2 ± 2.54</td> </tr> <tr> <td>4-Aminobiphenyl (ng/stick)</td> <td>0.00958 ± 0.0014</td> <td>2.83 ± 0.434</td> </tr> <tr> <td>Acetaldehyde (µg/stick)</td> <td>217 ± 7.85</td> <td>1641 ± 258</td> </tr> <tr> <td>Acrolein (µg/stick)</td> <td>9.63 ± 0.703</td> <td>156 ± 25.4</td> </tr> <tr> <td>Acrylonitrile (µg/stick)</td> <td>0.158 ± 0.0122</td> <td>24.5 ± 3.52</td> </tr> <tr> <td>Ammonia (µg/stick)</td> <td>10.5 ± 1.63</td> <td>29.3 ± 2.88</td> </tr> <tr> <td>Benzene (µg/stick)</td> <td>0.544 ± 0.0312</td> <td>81.1 ± 8.78</td> </tr> <tr> <td>Benzo[a]pyrene (ng/stick)</td> <td>0.939 ± 0.0796</td> <td>15 ± 1.3</td> </tr> <tr> <td>Carbon monoxide (mg/stick)</td> <td>0.436 ± 0.0811</td> <td>30.2 ± 2.76</td> </tr> <tr> <td>Crotonaldehyde (µg/stick)</td> <td>&lt;3.29</td> <td>50.5 ± 9.42</td> </tr> <tr> <td>Formaldehyde (µg/stick)</td> <td>7.98 ± 0.504</td> <td>85.2 ± 16.7</td> </tr> <tr> <td>Isoprene (µg/stick)</td> <td>2.15 ± 0.202</td> <td>894 ± 76.7</td> </tr> <tr> <td>NNN (ng/stick)</td> <td>10.2 ± 0.486</td> <td>283 ± 27.8</td> </tr> <tr> <td>NNK (ng/stick)</td> <td>6.75 ± 0.493</td> <td>264 ± 26.4</td> </tr> <tr> <td>Toluene(µg/stick)</td> <td>1.82 ± 0.163</td> <td>137 ± 16.9</td> </tr> <tr> <td>Nicotine (mg/stick)</td> <td>1.14 ± 0.0332</td> <td>1.86 ± 0.175</td> </tr> <tr> <td>Water (mg/stick)</td> <td>Not measured</td> <td>Not measured</td> </tr> <tr> <td>Glycerol (mg/stick)</td> <td>Not measured</td> <td>Not measured</td> </tr> <tr> <td>Total particulate matter (mg/stick)</td> <td>Not measured</td> <td>Not measured</td> </tr> <tr> <td>Nicotine-free dry particulate matter (mg/stick)</td> <td>Not measured</td> <td>Not measured</td> </tr> </tbody> </table> | HPHC             | IQOS         | 3R4F cigarette | Mean ± SD | Mean ± SD | 1,3-Butadiene (µg/stick) | 0.342 ± 0.0347 | 98.5 ± 9.8 | 1-Aminonaphthalene (ng/stick) | 0.0407 ± 0.0103 | 21.6 ± 2.28 | 2-Aminonaphthalene (ng/stick) | 0.0277 ± 0.00909 | 16.2 ± 2.54 | 4-Aminobiphenyl (ng/stick) | 0.00958 ± 0.0014 | 2.83 ± 0.434 | Acetaldehyde (µg/stick) | 217 ± 7.85 | 1641 ± 258 | Acrolein (µg/stick) | 9.63 ± 0.703 | 156 ± 25.4 | Acrylonitrile (µg/stick) | 0.158 ± 0.0122 | 24.5 ± 3.52 | Ammonia (µg/stick) | 10.5 ± 1.63 | 29.3 ± 2.88 | Benzene (µg/stick) | 0.544 ± 0.0312 | 81.1 ± 8.78 | Benzo[a]pyrene (ng/stick) | 0.939 ± 0.0796 | 15 ± 1.3 | Carbon monoxide (mg/stick) | 0.436 ± 0.0811 | 30.2 ± 2.76 | Crotonaldehyde (µg/stick) | <3.29 | 50.5 ± 9.42 | Formaldehyde (µg/stick) | 7.98 ± 0.504 | 85.2 ± 16.7 | Isoprene (µg/stick) | 2.15 ± 0.202 | 894 ± 76.7 | NNN (ng/stick) | 10.2 ± 0.486 | 283 ± 27.8 | NNK (ng/stick) | 6.75 ± 0.493 | 264 ± 26.4 | Toluene(µg/stick) | 1.82 ± 0.163 | 137 ± 16.9 | Nicotine (mg/stick) | 1.14 ± 0.0332 | 1.86 ± 0.175 | Water (mg/stick) | Not measured | Not measured | Glycerol (mg/stick) | Not measured | Not measured | Total particulate matter (mg/stick) | Not measured | Not measured | Nicotine-free dry particulate matter (mg/stick) | Not measured | Not measured |
|                                                 | HPHC                                                                                                                                                                                                                                                                                                                                                                                                                                                                                                                                                                                                                                                                                                                                                                                                                                                                                                                                                                                                                                                                                                                                                                                                                                                                                                                                                                                                                                                                                                                                                                                                                                                                                                                                                                                                                                                                                                                                                                                                                                                                                                                                                                                              |                  | IQOS         | 3R4F cigarette |           |           |                          |                |            |                               |                 |             |                               |                  |             |                            |                  |              |                         |            |            |                     |              |            |                          |                |             |                    |             |             |                    |                |             |                           |                |          |                            |                |             |                           |       |             |                         |              |             |                     |              |            |                |              |            |                |              |            |                   |              |            |                     |               |              |                  |              |              |                     |              |              |                                     |              |              |                                                 |              |              |
|                                                 |                                                                                                                                                                                                                                                                                                                                                                                                                                                                                                                                                                                                                                                                                                                                                                                                                                                                                                                                                                                                                                                                                                                                                                                                                                                                                                                                                                                                                                                                                                                                                                                                                                                                                                                                                                                                                                                                                                                                                                                                                                                                                                                                                                                                   | Mean ± SD        | Mean ± SD    |                |           |           |                          |                |            |                               |                 |             |                               |                  |             |                            |                  |              |                         |            |            |                     |              |            |                          |                |             |                    |             |             |                    |                |             |                           |                |          |                            |                |             |                           |       |             |                         |              |             |                     |              |            |                |              |            |                |              |            |                   |              |            |                     |               |              |                  |              |              |                     |              |              |                                     |              |              |                                                 |              |              |
|                                                 | 1,3-Butadiene (µg/stick)                                                                                                                                                                                                                                                                                                                                                                                                                                                                                                                                                                                                                                                                                                                                                                                                                                                                                                                                                                                                                                                                                                                                                                                                                                                                                                                                                                                                                                                                                                                                                                                                                                                                                                                                                                                                                                                                                                                                                                                                                                                                                                                                                                          | 0.342 ± 0.0347   | 98.5 ± 9.8   |                |           |           |                          |                |            |                               |                 |             |                               |                  |             |                            |                  |              |                         |            |            |                     |              |            |                          |                |             |                    |             |             |                    |                |             |                           |                |          |                            |                |             |                           |       |             |                         |              |             |                     |              |            |                |              |            |                |              |            |                   |              |            |                     |               |              |                  |              |              |                     |              |              |                                     |              |              |                                                 |              |              |
|                                                 | 1-Aminonaphthalene (ng/stick)                                                                                                                                                                                                                                                                                                                                                                                                                                                                                                                                                                                                                                                                                                                                                                                                                                                                                                                                                                                                                                                                                                                                                                                                                                                                                                                                                                                                                                                                                                                                                                                                                                                                                                                                                                                                                                                                                                                                                                                                                                                                                                                                                                     | 0.0407 ± 0.0103  | 21.6 ± 2.28  |                |           |           |                          |                |            |                               |                 |             |                               |                  |             |                            |                  |              |                         |            |            |                     |              |            |                          |                |             |                    |             |             |                    |                |             |                           |                |          |                            |                |             |                           |       |             |                         |              |             |                     |              |            |                |              |            |                |              |            |                   |              |            |                     |               |              |                  |              |              |                     |              |              |                                     |              |              |                                                 |              |              |
|                                                 | 2-Aminonaphthalene (ng/stick)                                                                                                                                                                                                                                                                                                                                                                                                                                                                                                                                                                                                                                                                                                                                                                                                                                                                                                                                                                                                                                                                                                                                                                                                                                                                                                                                                                                                                                                                                                                                                                                                                                                                                                                                                                                                                                                                                                                                                                                                                                                                                                                                                                     | 0.0277 ± 0.00909 | 16.2 ± 2.54  |                |           |           |                          |                |            |                               |                 |             |                               |                  |             |                            |                  |              |                         |            |            |                     |              |            |                          |                |             |                    |             |             |                    |                |             |                           |                |          |                            |                |             |                           |       |             |                         |              |             |                     |              |            |                |              |            |                |              |            |                   |              |            |                     |               |              |                  |              |              |                     |              |              |                                     |              |              |                                                 |              |              |
|                                                 | 4-Aminobiphenyl (ng/stick)                                                                                                                                                                                                                                                                                                                                                                                                                                                                                                                                                                                                                                                                                                                                                                                                                                                                                                                                                                                                                                                                                                                                                                                                                                                                                                                                                                                                                                                                                                                                                                                                                                                                                                                                                                                                                                                                                                                                                                                                                                                                                                                                                                        | 0.00958 ± 0.0014 | 2.83 ± 0.434 |                |           |           |                          |                |            |                               |                 |             |                               |                  |             |                            |                  |              |                         |            |            |                     |              |            |                          |                |             |                    |             |             |                    |                |             |                           |                |          |                            |                |             |                           |       |             |                         |              |             |                     |              |            |                |              |            |                |              |            |                   |              |            |                     |               |              |                  |              |              |                     |              |              |                                     |              |              |                                                 |              |              |
|                                                 | Acetaldehyde (µg/stick)                                                                                                                                                                                                                                                                                                                                                                                                                                                                                                                                                                                                                                                                                                                                                                                                                                                                                                                                                                                                                                                                                                                                                                                                                                                                                                                                                                                                                                                                                                                                                                                                                                                                                                                                                                                                                                                                                                                                                                                                                                                                                                                                                                           | 217 ± 7.85       | 1641 ± 258   |                |           |           |                          |                |            |                               |                 |             |                               |                  |             |                            |                  |              |                         |            |            |                     |              |            |                          |                |             |                    |             |             |                    |                |             |                           |                |          |                            |                |             |                           |       |             |                         |              |             |                     |              |            |                |              |            |                |              |            |                   |              |            |                     |               |              |                  |              |              |                     |              |              |                                     |              |              |                                                 |              |              |
|                                                 | Acrolein (µg/stick)                                                                                                                                                                                                                                                                                                                                                                                                                                                                                                                                                                                                                                                                                                                                                                                                                                                                                                                                                                                                                                                                                                                                                                                                                                                                                                                                                                                                                                                                                                                                                                                                                                                                                                                                                                                                                                                                                                                                                                                                                                                                                                                                                                               | 9.63 ± 0.703     | 156 ± 25.4   |                |           |           |                          |                |            |                               |                 |             |                               |                  |             |                            |                  |              |                         |            |            |                     |              |            |                          |                |             |                    |             |             |                    |                |             |                           |                |          |                            |                |             |                           |       |             |                         |              |             |                     |              |            |                |              |            |                |              |            |                   |              |            |                     |               |              |                  |              |              |                     |              |              |                                     |              |              |                                                 |              |              |
|                                                 | Acrylonitrile (µg/stick)                                                                                                                                                                                                                                                                                                                                                                                                                                                                                                                                                                                                                                                                                                                                                                                                                                                                                                                                                                                                                                                                                                                                                                                                                                                                                                                                                                                                                                                                                                                                                                                                                                                                                                                                                                                                                                                                                                                                                                                                                                                                                                                                                                          | 0.158 ± 0.0122   | 24.5 ± 3.52  |                |           |           |                          |                |            |                               |                 |             |                               |                  |             |                            |                  |              |                         |            |            |                     |              |            |                          |                |             |                    |             |             |                    |                |             |                           |                |          |                            |                |             |                           |       |             |                         |              |             |                     |              |            |                |              |            |                |              |            |                   |              |            |                     |               |              |                  |              |              |                     |              |              |                                     |              |              |                                                 |              |              |
|                                                 | Ammonia (µg/stick)                                                                                                                                                                                                                                                                                                                                                                                                                                                                                                                                                                                                                                                                                                                                                                                                                                                                                                                                                                                                                                                                                                                                                                                                                                                                                                                                                                                                                                                                                                                                                                                                                                                                                                                                                                                                                                                                                                                                                                                                                                                                                                                                                                                | 10.5 ± 1.63      | 29.3 ± 2.88  |                |           |           |                          |                |            |                               |                 |             |                               |                  |             |                            |                  |              |                         |            |            |                     |              |            |                          |                |             |                    |             |             |                    |                |             |                           |                |          |                            |                |             |                           |       |             |                         |              |             |                     |              |            |                |              |            |                |              |            |                   |              |            |                     |               |              |                  |              |              |                     |              |              |                                     |              |              |                                                 |              |              |
|                                                 | Benzene (µg/stick)                                                                                                                                                                                                                                                                                                                                                                                                                                                                                                                                                                                                                                                                                                                                                                                                                                                                                                                                                                                                                                                                                                                                                                                                                                                                                                                                                                                                                                                                                                                                                                                                                                                                                                                                                                                                                                                                                                                                                                                                                                                                                                                                                                                | 0.544 ± 0.0312   | 81.1 ± 8.78  |                |           |           |                          |                |            |                               |                 |             |                               |                  |             |                            |                  |              |                         |            |            |                     |              |            |                          |                |             |                    |             |             |                    |                |             |                           |                |          |                            |                |             |                           |       |             |                         |              |             |                     |              |            |                |              |            |                |              |            |                   |              |            |                     |               |              |                  |              |              |                     |              |              |                                     |              |              |                                                 |              |              |
|                                                 | Benzo[a]pyrene (ng/stick)                                                                                                                                                                                                                                                                                                                                                                                                                                                                                                                                                                                                                                                                                                                                                                                                                                                                                                                                                                                                                                                                                                                                                                                                                                                                                                                                                                                                                                                                                                                                                                                                                                                                                                                                                                                                                                                                                                                                                                                                                                                                                                                                                                         | 0.939 ± 0.0796   | 15 ± 1.3     |                |           |           |                          |                |            |                               |                 |             |                               |                  |             |                            |                  |              |                         |            |            |                     |              |            |                          |                |             |                    |             |             |                    |                |             |                           |                |          |                            |                |             |                           |       |             |                         |              |             |                     |              |            |                |              |            |                |              |            |                   |              |            |                     |               |              |                  |              |              |                     |              |              |                                     |              |              |                                                 |              |              |
|                                                 | Carbon monoxide (mg/stick)                                                                                                                                                                                                                                                                                                                                                                                                                                                                                                                                                                                                                                                                                                                                                                                                                                                                                                                                                                                                                                                                                                                                                                                                                                                                                                                                                                                                                                                                                                                                                                                                                                                                                                                                                                                                                                                                                                                                                                                                                                                                                                                                                                        | 0.436 ± 0.0811   | 30.2 ± 2.76  |                |           |           |                          |                |            |                               |                 |             |                               |                  |             |                            |                  |              |                         |            |            |                     |              |            |                          |                |             |                    |             |             |                    |                |             |                           |                |          |                            |                |             |                           |       |             |                         |              |             |                     |              |            |                |              |            |                |              |            |                   |              |            |                     |               |              |                  |              |              |                     |              |              |                                     |              |              |                                                 |              |              |
|                                                 | Crotonaldehyde (µg/stick)                                                                                                                                                                                                                                                                                                                                                                                                                                                                                                                                                                                                                                                                                                                                                                                                                                                                                                                                                                                                                                                                                                                                                                                                                                                                                                                                                                                                                                                                                                                                                                                                                                                                                                                                                                                                                                                                                                                                                                                                                                                                                                                                                                         | <3.29            | 50.5 ± 9.42  |                |           |           |                          |                |            |                               |                 |             |                               |                  |             |                            |                  |              |                         |            |            |                     |              |            |                          |                |             |                    |             |             |                    |                |             |                           |                |          |                            |                |             |                           |       |             |                         |              |             |                     |              |            |                |              |            |                |              |            |                   |              |            |                     |               |              |                  |              |              |                     |              |              |                                     |              |              |                                                 |              |              |
|                                                 | Formaldehyde (µg/stick)                                                                                                                                                                                                                                                                                                                                                                                                                                                                                                                                                                                                                                                                                                                                                                                                                                                                                                                                                                                                                                                                                                                                                                                                                                                                                                                                                                                                                                                                                                                                                                                                                                                                                                                                                                                                                                                                                                                                                                                                                                                                                                                                                                           | 7.98 ± 0.504     | 85.2 ± 16.7  |                |           |           |                          |                |            |                               |                 |             |                               |                  |             |                            |                  |              |                         |            |            |                     |              |            |                          |                |             |                    |             |             |                    |                |             |                           |                |          |                            |                |             |                           |       |             |                         |              |             |                     |              |            |                |              |            |                |              |            |                   |              |            |                     |               |              |                  |              |              |                     |              |              |                                     |              |              |                                                 |              |              |
|                                                 | Isoprene (µg/stick)                                                                                                                                                                                                                                                                                                                                                                                                                                                                                                                                                                                                                                                                                                                                                                                                                                                                                                                                                                                                                                                                                                                                                                                                                                                                                                                                                                                                                                                                                                                                                                                                                                                                                                                                                                                                                                                                                                                                                                                                                                                                                                                                                                               | 2.15 ± 0.202     | 894 ± 76.7   |                |           |           |                          |                |            |                               |                 |             |                               |                  |             |                            |                  |              |                         |            |            |                     |              |            |                          |                |             |                    |             |             |                    |                |             |                           |                |          |                            |                |             |                           |       |             |                         |              |             |                     |              |            |                |              |            |                |              |            |                   |              |            |                     |               |              |                  |              |              |                     |              |              |                                     |              |              |                                                 |              |              |
|                                                 | NNN (ng/stick)                                                                                                                                                                                                                                                                                                                                                                                                                                                                                                                                                                                                                                                                                                                                                                                                                                                                                                                                                                                                                                                                                                                                                                                                                                                                                                                                                                                                                                                                                                                                                                                                                                                                                                                                                                                                                                                                                                                                                                                                                                                                                                                                                                                    | 10.2 ± 0.486     | 283 ± 27.8   |                |           |           |                          |                |            |                               |                 |             |                               |                  |             |                            |                  |              |                         |            |            |                     |              |            |                          |                |             |                    |             |             |                    |                |             |                           |                |          |                            |                |             |                           |       |             |                         |              |             |                     |              |            |                |              |            |                |              |            |                   |              |            |                     |               |              |                  |              |              |                     |              |              |                                     |              |              |                                                 |              |              |
|                                                 | NNK (ng/stick)                                                                                                                                                                                                                                                                                                                                                                                                                                                                                                                                                                                                                                                                                                                                                                                                                                                                                                                                                                                                                                                                                                                                                                                                                                                                                                                                                                                                                                                                                                                                                                                                                                                                                                                                                                                                                                                                                                                                                                                                                                                                                                                                                                                    | 6.75 ± 0.493     | 264 ± 26.4   |                |           |           |                          |                |            |                               |                 |             |                               |                  |             |                            |                  |              |                         |            |            |                     |              |            |                          |                |             |                    |             |             |                    |                |             |                           |                |          |                            |                |             |                           |       |             |                         |              |             |                     |              |            |                |              |            |                |              |            |                   |              |            |                     |               |              |                  |              |              |                     |              |              |                                     |              |              |                                                 |              |              |
| Toluene(µg/stick)                               | 1.82 ± 0.163                                                                                                                                                                                                                                                                                                                                                                                                                                                                                                                                                                                                                                                                                                                                                                                                                                                                                                                                                                                                                                                                                                                                                                                                                                                                                                                                                                                                                                                                                                                                                                                                                                                                                                                                                                                                                                                                                                                                                                                                                                                                                                                                                                                      | 137 ± 16.9       |              |                |           |           |                          |                |            |                               |                 |             |                               |                  |             |                            |                  |              |                         |            |            |                     |              |            |                          |                |             |                    |             |             |                    |                |             |                           |                |          |                            |                |             |                           |       |             |                         |              |             |                     |              |            |                |              |            |                |              |            |                   |              |            |                     |               |              |                  |              |              |                     |              |              |                                     |              |              |                                                 |              |              |
| Nicotine (mg/stick)                             | 1.14 ± 0.0332                                                                                                                                                                                                                                                                                                                                                                                                                                                                                                                                                                                                                                                                                                                                                                                                                                                                                                                                                                                                                                                                                                                                                                                                                                                                                                                                                                                                                                                                                                                                                                                                                                                                                                                                                                                                                                                                                                                                                                                                                                                                                                                                                                                     | 1.86 ± 0.175     |              |                |           |           |                          |                |            |                               |                 |             |                               |                  |             |                            |                  |              |                         |            |            |                     |              |            |                          |                |             |                    |             |             |                    |                |             |                           |                |          |                            |                |             |                           |       |             |                         |              |             |                     |              |            |                |              |            |                |              |            |                   |              |            |                     |               |              |                  |              |              |                     |              |              |                                     |              |              |                                                 |              |              |
| Water (mg/stick)                                | Not measured                                                                                                                                                                                                                                                                                                                                                                                                                                                                                                                                                                                                                                                                                                                                                                                                                                                                                                                                                                                                                                                                                                                                                                                                                                                                                                                                                                                                                                                                                                                                                                                                                                                                                                                                                                                                                                                                                                                                                                                                                                                                                                                                                                                      | Not measured     |              |                |           |           |                          |                |            |                               |                 |             |                               |                  |             |                            |                  |              |                         |            |            |                     |              |            |                          |                |             |                    |             |             |                    |                |             |                           |                |          |                            |                |             |                           |       |             |                         |              |             |                     |              |            |                |              |            |                |              |            |                   |              |            |                     |               |              |                  |              |              |                     |              |              |                                     |              |              |                                                 |              |              |
| Glycerol (mg/stick)                             | Not measured                                                                                                                                                                                                                                                                                                                                                                                                                                                                                                                                                                                                                                                                                                                                                                                                                                                                                                                                                                                                                                                                                                                                                                                                                                                                                                                                                                                                                                                                                                                                                                                                                                                                                                                                                                                                                                                                                                                                                                                                                                                                                                                                                                                      | Not measured     |              |                |           |           |                          |                |            |                               |                 |             |                               |                  |             |                            |                  |              |                         |            |            |                     |              |            |                          |                |             |                    |             |             |                    |                |             |                           |                |          |                            |                |             |                           |       |             |                         |              |             |                     |              |            |                |              |            |                |              |            |                   |              |            |                     |               |              |                  |              |              |                     |              |              |                                     |              |              |                                                 |              |              |
| Total particulate matter (mg/stick)             | Not measured                                                                                                                                                                                                                                                                                                                                                                                                                                                                                                                                                                                                                                                                                                                                                                                                                                                                                                                                                                                                                                                                                                                                                                                                                                                                                                                                                                                                                                                                                                                                                                                                                                                                                                                                                                                                                                                                                                                                                                                                                                                                                                                                                                                      | Not measured     |              |                |           |           |                          |                |            |                               |                 |             |                               |                  |             |                            |                  |              |                         |            |            |                     |              |            |                          |                |             |                    |             |             |                    |                |             |                           |                |          |                            |                |             |                           |       |             |                         |              |             |                     |              |            |                |              |            |                |              |            |                   |              |            |                     |               |              |                  |              |              |                     |              |              |                                     |              |              |                                                 |              |              |
| Nicotine-free dry particulate matter (mg/stick) | Not measured                                                                                                                                                                                                                                                                                                                                                                                                                                                                                                                                                                                                                                                                                                                                                                                                                                                                                                                                                                                                                                                                                                                                                                                                                                                                                                                                                                                                                                                                                                                                                                                                                                                                                                                                                                                                                                                                                                                                                                                                                                                                                                                                                                                      | Not measured     |              |                |           |           |                          |                |            |                               |                 |             |                               |                  |             |                            |                  |              |                         |            |            |                     |              |            |                          |                |             |                    |             |             |                    |                |             |                           |                |          |                            |                |             |                           |       |             |                         |              |             |                     |              |            |                |              |            |                |              |            |                   |              |            |                     |               |              |                  |              |              |                     |              |              |                                     |              |              |                                                 |              |              |
| <b>Authors' conclusions</b>                     | <ul style="list-style-type: none"> <li>• In comparison with HPHC levels in the mainstream smoke of 3R4F cigarettes, the average reduction over all analysed HPHC in IQOS is found to be 92% on a per tobacco stick basis and 87% on a nicotine-adjusted basis.</li> <li>• In comparison with the HPHC in the mainstream smoke of commercial cigarettes, the mean reduction observed for the IQOS</li> </ul>                                                                                                                                                                                                                                                                                                                                                                                                                                                                                                                                                                                                                                                                                                                                                                                                                                                                                                                                                                                                                                                                                                                                                                                                                                                                                                                                                                                                                                                                                                                                                                                                                                                                                                                                                                                       |                  |              |                |           |           |                          |                |            |                               |                 |             |                               |                  |             |                            |                  |              |                         |            |            |                     |              |            |                          |                |             |                    |             |             |                    |                |             |                           |                |          |                            |                |             |                           |       |             |                         |              |             |                     |              |            |                |              |            |                |              |            |                   |              |            |                     |               |              |                  |              |              |                     |              |              |                                     |              |              |                                                 |              |              |

|                               | aerosol HPHC is close to the reduction for 3R4F: 90–92% reduction for the per tobacco stick basis using HCl puffing regimen and 83–88% reduction for the nicotine-adjusted results.                                                                                                                                                                                                                                                                                                                                                                                                                                                                                                                                                                                                                                                                                                                                                                                |                                  |                |             |                |      |                                  |                                  |           |
|-------------------------------|--------------------------------------------------------------------------------------------------------------------------------------------------------------------------------------------------------------------------------------------------------------------------------------------------------------------------------------------------------------------------------------------------------------------------------------------------------------------------------------------------------------------------------------------------------------------------------------------------------------------------------------------------------------------------------------------------------------------------------------------------------------------------------------------------------------------------------------------------------------------------------------------------------------------------------------------------------------------|----------------------------------|----------------|-------------|----------------|------|----------------------------------|----------------------------------|-----------|
| <b>Authors, study year</b>    | <b>Poynton et al., 2017</b> [28]                                                                                                                                                                                                                                                                                                                                                                                                                                                                                                                                                                                                                                                                                                                                                                                                                                                                                                                                   |                                  |                |             |                |      |                                  |                                  |           |
| <b>Funder/Affiliations</b>    | <b>Affiliations:</b> Research and Development, British American Tobacco Investments Ltd, Regents Park Road, Southampton, Hampshire SO15 8TL, UK                                                                                                                                                                                                                                                                                                                                                                                                                                                                                                                                                                                                                                                                                                                                                                                                                    |                                  |                |             |                |      |                                  |                                  |           |
| <b>Primary aim</b>            | To compare levels of HPHC in mainstream iFuse emissions with those in mainstream pen-style e-cigarette emissions and cigarette smoke                                                                                                                                                                                                                                                                                                                                                                                                                                                                                                                                                                                                                                                                                                                                                                                                                               |                                  |                |             |                |      |                                  |                                  |           |
| <b>Products used</b>          | <ul style="list-style-type: none"> <li>Reference cigarette 3R4F (ISO tar yield 9.4 mg/cigarette in 9 puffs)</li> <li>E-cigarette: pen-style Vype ePen I (Nicoventures trading Ltd, Blackburn, UK)</li> <li>Hybrid tobacco product (commercially available as iFuse in Romania): a button operated electronic vapour device consisting of USB-rechargeable battery and a closed-system, disposable neopod cartomizer The cartomizer comprises of an atomizer, a liquid tank (1.15 ml of non-flavoured liquid composed of propylene glycol, vegetable glycerine, water, and nicotine), and a chamber containing a 130 mg blended tobacco plug. When activated, the user's drawn warm aerosol goes up through the plug of tobacco and takes volatile tobacco flavour compounds giving sensory characteristics of the tobacco used. The battery life of the device allows at least 300 puffs from a single charge, which is sufficient for a single neopod.</li> </ul> |                                  |                |             |                |      |                                  |                                  |           |
| <b>Methods</b>                | <p><b>Design:</b> Laboratory comparison study using smoking machines</p> <p><b>Study time and setting:</b> not reported</p> <p><b>Measures:</b> yields of HPHC in the mainstream aerosol from the iFuse are compared to yields of HPHC in the mainstream smoke from the standardized reference cigarette 3R4F and the e-cigarette</p>                                                                                                                                                                                                                                                                                                                                                                                                                                                                                                                                                                                                                              |                                  |                |             |                |      |                                  |                                  |           |
| <b>Participants</b>           | Not reported                                                                                                                                                                                                                                                                                                                                                                                                                                                                                                                                                                                                                                                                                                                                                                                                                                                                                                                                                       |                                  |                |             |                |      |                                  |                                  |           |
| <b>Interventions/Exposure</b> | <ul style="list-style-type: none"> <li>The 3R4F reference cigarette was machine-smoked using the HCl regimen. Emissions data collected on a per-cigarette basis with puff number collected.</li> <li>Both iFuse and the e-cigarette were machine-smoked using the following puffing regime: 55 ml puff volume, 3 seconds puffing duration, 30 seconds inter-puff interval, with devices' voltage set at 3.6 V. The analyses for each two products were conducted in two blocks of 100 puffs, and the levels of emissions were averaged on a per-puff basis.</li> </ul>                                                                                                                                                                                                                                                                                                                                                                                             |                                  |                |             |                |      |                                  |                                  |           |
| <b>Outcome/Key findings</b>   | <p><b>Yields of HPHC in the mainstream aerosol of iFuse and pen-style e-cigarette, and in the mainstream smoke of 3R4F reference cigarette</b></p> <table border="1"> <thead> <tr> <th></th> <th>iFuse</th> <th>E-cigarette</th> <th>3R4F cigarette</th> </tr> </thead> <tbody> <tr> <td>HPHC</td> <td>Mean ± SD<sup>a</sup> (per 100)</td> <td>Mean ± SD<sup>a</sup> (per 100)</td> <td>Mean ± SD</td> </tr> </tbody> </table>                                                                                                                                                                                                                                                                                                                                                                                                                                                                                                                                    |                                  | iFuse          | E-cigarette | 3R4F cigarette | HPHC | Mean ± SD <sup>a</sup> (per 100) | Mean ± SD <sup>a</sup> (per 100) | Mean ± SD |
|                               | iFuse                                                                                                                                                                                                                                                                                                                                                                                                                                                                                                                                                                                                                                                                                                                                                                                                                                                                                                                                                              | E-cigarette                      | 3R4F cigarette |             |                |      |                                  |                                  |           |
| HPHC                          | Mean ± SD <sup>a</sup> (per 100)                                                                                                                                                                                                                                                                                                                                                                                                                                                                                                                                                                                                                                                                                                                                                                                                                                                                                                                                   | Mean ± SD <sup>a</sup> (per 100) | Mean ± SD      |             |                |      |                                  |                                  |           |

|                             |                                                                                                                                                                                                                                                                                                                                                                                                                                                                                                                                                                                                                                                                                          | puffs)             | puffs)      |             |
|-----------------------------|------------------------------------------------------------------------------------------------------------------------------------------------------------------------------------------------------------------------------------------------------------------------------------------------------------------------------------------------------------------------------------------------------------------------------------------------------------------------------------------------------------------------------------------------------------------------------------------------------------------------------------------------------------------------------------------|--------------------|-------------|-------------|
|                             | 1,3-Butadiene (µg/stick)                                                                                                                                                                                                                                                                                                                                                                                                                                                                                                                                                                                                                                                                 | <0.29              | <0.29       | 91.8 ± 5.6  |
|                             | 1-Aminonaphthalene (ng/stick)                                                                                                                                                                                                                                                                                                                                                                                                                                                                                                                                                                                                                                                            | <0.27 <sup>b</sup> | 0.49 ± 0.32 | 19.3 ± 3.2  |
|                             | 2-Aminonaphthalene (ng/stick)                                                                                                                                                                                                                                                                                                                                                                                                                                                                                                                                                                                                                                                            | 0.40 ± 0.19        | 0.82 ± 0.38 | 12.5 ± 0.5  |
|                             | 4-Aminobiphenyl (ng/stick)                                                                                                                                                                                                                                                                                                                                                                                                                                                                                                                                                                                                                                                               | 0.06 ± 0.04        | 0.17 ± 0.10 | 2.14 ± 0.50 |
|                             | Acetaldehyde (µg/stick)                                                                                                                                                                                                                                                                                                                                                                                                                                                                                                                                                                                                                                                                  | 8.53 ± 1.67        | 10.7 ± 2.9  | 1732 ± 43   |
|                             | Acrolein (µg/stick)                                                                                                                                                                                                                                                                                                                                                                                                                                                                                                                                                                                                                                                                      | 8.38 ± 9.45        | 7.90 ± 5.56 | 172 ± 3     |
|                             | Acrylonitrile (µg/stick)                                                                                                                                                                                                                                                                                                                                                                                                                                                                                                                                                                                                                                                                 | <0.32              | <0.32       | 21.4 ± 1.8  |
|                             | Ammonia (µg/stick)                                                                                                                                                                                                                                                                                                                                                                                                                                                                                                                                                                                                                                                                       | <14.63             | <4.39       | 29.5 ± 2.0  |
|                             | Benzene (µg/stick)                                                                                                                                                                                                                                                                                                                                                                                                                                                                                                                                                                                                                                                                       | <0.17              | <0.17       | 72.9 ± 7.4  |
|                             | Benzo[a]pyrene (ng/stick)                                                                                                                                                                                                                                                                                                                                                                                                                                                                                                                                                                                                                                                                | <1.06              | <1.06       | 14.3 ± 1.6  |
|                             | Carbon monoxide (mg/stick)                                                                                                                                                                                                                                                                                                                                                                                                                                                                                                                                                                                                                                                               | 6.31 ± 0.71        | 6.75 ± 0.28 | 29.6 ± 1.5  |
|                             | Crotonaldehyde (µg/stick)                                                                                                                                                                                                                                                                                                                                                                                                                                                                                                                                                                                                                                                                | <1.98              | <1.98       | 57.0 ± 1.7  |
|                             | Formaldehyde (µg/stick)                                                                                                                                                                                                                                                                                                                                                                                                                                                                                                                                                                                                                                                                  | 12.2 ± 5.2         | 12.3 ± 4.9  | 94.9 ± 6.2  |
|                             | Isoprene (µg/stick)                                                                                                                                                                                                                                                                                                                                                                                                                                                                                                                                                                                                                                                                      | <0.41              | <0.41       | 847 ± 59    |
|                             | NNN (ng/stick)                                                                                                                                                                                                                                                                                                                                                                                                                                                                                                                                                                                                                                                                           | 2.20 ± 0.59        | <1.97       | 265 ± 22    |
|                             | NNK (ng/stick)                                                                                                                                                                                                                                                                                                                                                                                                                                                                                                                                                                                                                                                                           | <3.01              | <3.01       | 283 ± 24    |
|                             | Toluene(µg/stick)                                                                                                                                                                                                                                                                                                                                                                                                                                                                                                                                                                                                                                                                        | 2.53 ± 0.14        | 2.64 ± 0.22 | 116 ± 9     |
|                             | Nicotine (mg/stick)                                                                                                                                                                                                                                                                                                                                                                                                                                                                                                                                                                                                                                                                      | 2.56 ± 1.33        | 3.57 ± 1.10 | 1.84 ± 0.08 |
|                             | Note: <sup>a</sup> out of the two puffing blocks (1–100 and 101–200) the highest measured mean of toxicants was used                                                                                                                                                                                                                                                                                                                                                                                                                                                                                                                                                                     |                    |             |             |
|                             | <sup>b</sup> If measured levels were below quantification or detection limits, the lowest value was then used                                                                                                                                                                                                                                                                                                                                                                                                                                                                                                                                                                            |                    |             |             |
| <b>Authors' conclusions</b> | <ul style="list-style-type: none"> <li>• The temperature of the aerosol of iFuse had an average maximum of 35 °C before reaching the tobacco and decreased to an average maximum of 32 °C after the tobacco plug.</li> <li>• The nicotine measured in the aerosol originated almost exclusively from the liquid rather than from the tobacco.</li> <li>• The nicotine levels measured in the two puff blocks of the iFuse were slightly lower than those of the tested e-cigarette</li> <li>• The emission levels from iFuse HnB product were comparable to those measured from the e-cigarette, and were 92–99% lower on a per-puff basis than those from the 3R4F cigarette</li> </ul> |                    |             |             |
| <b>Authors, study year</b>  | Pratte et al., 2017 [29]                                                                                                                                                                                                                                                                                                                                                                                                                                                                                                                                                                                                                                                                 |                    |             |             |
| <b>Funder/Affiliations</b>  | Affiliations: Philip Morris International R&D, Philip Morris Products S.A., Neuchatel, Switzerland                                                                                                                                                                                                                                                                                                                                                                                                                                                                                                                                                                                       |                    |             |             |
| <b>Primary aim</b>          | To compare numbers of solid particles in mainstream IQOS emissions with those in mainstream cigarette smoke                                                                                                                                                                                                                                                                                                                                                                                                                                                                                                                                                                              |                    |             |             |
| <b>Products used</b>        | <ul style="list-style-type: none"> <li>• 3R4F reference cigarette</li> <li>• IQOS with regular tobacco sticks</li> </ul>                                                                                                                                                                                                                                                                                                                                                                                                                                                                                                                                                                 |                    |             |             |



|                                      |                                                                                                                                                                                                                                                                                                                                                             |
|--------------------------------------|-------------------------------------------------------------------------------------------------------------------------------------------------------------------------------------------------------------------------------------------------------------------------------------------------------------------------------------------------------------|
| <p><b>Methods</b></p>                | <p><b>Design:</b> Laboratory study of mainstream smoke and aerosol compositions from two different tobacco products</p> <p>Study time and setting: not reported</p> <p><b>Measures:</b> the collection of solid particles from reference cigarette smoke and IQOS aerosol</p>                                                                               |
| <p><b>Participants</b></p>           | <p>Not reported</p>                                                                                                                                                                                                                                                                                                                                         |
| <p><b>Interventions/Exposure</b></p> | <p>The test products were machine smoked using HCl puffing regimens</p>                                                                                                                                                                                                                                                                                     |
| <p><b>Outcome/Key findings</b></p>   | <ul style="list-style-type: none"> <li>• In the mainstream smoke from a 3R4F cigarette approximately <math>10^{12}</math> solid particles of the median diameter of approximately 75 nm (ultrafine particles) were identified</li> <li>• No solid particles were accumulated from the mainstream aerosol of IQOS in comparison to the blank test</li> </ul> |
| <p><b>Authors' conclusions</b></p>   | <ul style="list-style-type: none"> <li>• Heated tobacco products neither generate nor transfer solid particles in the mainstream aerosol when considering applied experimental conditions</li> </ul>                                                                                                                                                        |

Table A3 Findings of the studies on heat not burn use by human participants

|                                      |                                                                                                                                                                                                                                                                                                                                                                                                                                                                                                                                                                                                                                                                                                                                                                                                                                                                                                                                                                                    |                    |                    |                    |
|--------------------------------------|------------------------------------------------------------------------------------------------------------------------------------------------------------------------------------------------------------------------------------------------------------------------------------------------------------------------------------------------------------------------------------------------------------------------------------------------------------------------------------------------------------------------------------------------------------------------------------------------------------------------------------------------------------------------------------------------------------------------------------------------------------------------------------------------------------------------------------------------------------------------------------------------------------------------------------------------------------------------------------|--------------------|--------------------|--------------------|
| <b>Authors, study year</b>           | <b>Lopez et al., 2016 [7]</b>                                                                                                                                                                                                                                                                                                                                                                                                                                                                                                                                                                                                                                                                                                                                                                                                                                                                                                                                                      |                    |                    |                    |
| <b>Funder/Affiliations</b>           | <p><b>Funded by:</b> National Institute on Drug Abuse of the National Institutes of Health under Award Number P50DA036105 and the Center for Tobacco Products of the U.S. Food and Drug Administration</p> <p><b>Affiliations:</b> Virginia Commonwealth University, Department of Psychology and Center for the Study of Tobacco Products</p>                                                                                                                                                                                                                                                                                                                                                                                                                                                                                                                                                                                                                                     |                    |                    |                    |
| <b>Primary aim</b>                   | To compare nicotine delivery, expired air CO concentration and abstinence symptom suppression                                                                                                                                                                                                                                                                                                                                                                                                                                                                                                                                                                                                                                                                                                                                                                                                                                                                                      |                    |                    |                    |
| <b>Products used</b>                 | <ul style="list-style-type: none"> <li>• Pax loose-leaf tobacco vaporiser (LLTV): pre-filled with 1 g of Zig Zag brand loose-leaf tobacco (produced by National Tobacco Company, Louisville, Kentucky). Tobacco or menthol flavour was matched to the participants' preferred own brand cigarettes' flavour</li> <li>• Own brand cigarettes</li> <li>• E-cigarette: pen-style 'eGo', 3.3 V, 1000 mAh e-cigarette battery attached to a 1.5 ohm, dual coil, 510-style cartomizer (Smok-Tech; Shenzhen, China). The cartomizer was pre-loaded with approximately 1 ml of 18 mg/ml nicotine liquid (70% propylene glycol and 30% vegetable glycerine) (AVAIL Vapor, Richmond, Virginia). Tobacco or menthol liquid flavour was matched to the participants' preferred brand cigarettes' flavour</li> </ul>                                                                                                                                                                            |                    |                    |                    |
| <b>Methods</b>                       | <p><b>Design:</b> Randomised crossover experimental trial</p> <p><b>Recruitment:</b> smokers recruited by advertisements and word of mouth</p> <p><b>Study date and setting:</b> time not reported; Virginia Commonwealth University's (VCU) Clinical Behavioral Pharmacology Laboratory, Virginia USA</p> <p><b>Protocol registered:</b> not registered</p> <p><b>Inclusion criteria:</b> healthy; 18–55 years old; smoked ≥10 cigarettes per day (CPD); had used an e-cigarette ≤ 20 times and a LLTV &lt; 5 times in their lifetime</p> <p><b>Exclusion criteria:</b> history of chronic disease or psychiatric condition; regular prescription medication use (aside from birth control); marijuana use &gt;10 days and alcohol use &gt;25 days in the past 30 days; use of a vaporiser for marijuana &gt;5 times in their lifetime; any illicit drug use (e.g. cocaine, opioids, benzodiazepines, and methamphetamine) in the past 30 days; tested positive for pregnancy</p> |                    |                    |                    |
| <b>Participants</b>                  | Forty provided informed consent, 16/40 (40%) did not meet the eligibility criteria; 9/24(38%) discontinued the study<br>N=15; 80% male; mean age 33.6; 47% white, 40% Black/African American; mean CPD=16.1; mean Fagerström Test for Nicotine Dependence (FTND)=5.1                                                                                                                                                                                                                                                                                                                                                                                                                                                                                                                                                                                                                                                                                                               |                    |                    |                    |
| <b>Interventions/Exposure</b>        | Three 2.5-hour sessions where participants used different products. Sessions were separated by a minimum 48 hours with washout period (abstinence from nicotine/tobacco) of at least 12 hours. In each session participants completed two 10-puff product use bouts (30 s inter-puff intervals) separated by 60 minutes.                                                                                                                                                                                                                                                                                                                                                                                                                                                                                                                                                                                                                                                           |                    |                    |                    |
| <b>Outcome/Key findings</b>          |                                                                                                                                                                                                                                                                                                                                                                                                                                                                                                                                                                                                                                                                                                                                                                                                                                                                                                                                                                                    | <b>Pax</b>         | <b>Cigarette</b>   | <b>E-cigarette</b> |
|                                      | <b>Plasma nicotine concentration, ng/ml (SD), Cohen's d</b>                                                                                                                                                                                                                                                                                                                                                                                                                                                                                                                                                                                                                                                                                                                                                                                                                                                                                                                        |                    |                    |                    |
|                                      | Bout 1                                                                                                                                                                                                                                                                                                                                                                                                                                                                                                                                                                                                                                                                                                                                                                                                                                                                                                                                                                             | 14.3 (8.1), d=1.2  | 24.4 (12.6), d=2.5 | 9.5 (8.5), d=2.0   |
|                                      | Bout 2                                                                                                                                                                                                                                                                                                                                                                                                                                                                                                                                                                                                                                                                                                                                                                                                                                                                                                                                                                             | 16.4 (11.3), d=1.7 | 23.7 (14.5), d=2.1 | 9.5 (7.5), d=1.4   |
| <b>Expired air CO concentration,</b> |                                                                                                                                                                                                                                                                                                                                                                                                                                                                                                                                                                                                                                                                                                                                                                                                                                                                                                                                                                                    |                    |                    |                    |

|                               |                                                                                                                                                                                                                                                                                                                                                                                                                                                                                                                                                                                                                                                                                                                                                                                                                                                                                                                                                                                                                                                                                                                                                            |                                |                                 |                            |
|-------------------------------|------------------------------------------------------------------------------------------------------------------------------------------------------------------------------------------------------------------------------------------------------------------------------------------------------------------------------------------------------------------------------------------------------------------------------------------------------------------------------------------------------------------------------------------------------------------------------------------------------------------------------------------------------------------------------------------------------------------------------------------------------------------------------------------------------------------------------------------------------------------------------------------------------------------------------------------------------------------------------------------------------------------------------------------------------------------------------------------------------------------------------------------------------------|--------------------------------|---------------------------------|----------------------------|
|                               | ppm (SD), Cohen's d                                                                                                                                                                                                                                                                                                                                                                                                                                                                                                                                                                                                                                                                                                                                                                                                                                                                                                                                                                                                                                                                                                                                        |                                |                                 |                            |
|                               | Bout 1                                                                                                                                                                                                                                                                                                                                                                                                                                                                                                                                                                                                                                                                                                                                                                                                                                                                                                                                                                                                                                                                                                                                                     | ppm (SD) not provided, d=-0.2  | 12.1 (3.4), d=2.1               | Not provided               |
|                               | Bout 2                                                                                                                                                                                                                                                                                                                                                                                                                                                                                                                                                                                                                                                                                                                                                                                                                                                                                                                                                                                                                                                                                                                                                     | 4.5 (2.1), d=-0.5              | 16.9 (5.8), d=2.5               | 4.5 (1.7), d=-0.7          |
|                               | <b>Abstinence symptom suppression,</b><br>initial score (SD) – score after<br>use (SD), Cohen's d                                                                                                                                                                                                                                                                                                                                                                                                                                                                                                                                                                                                                                                                                                                                                                                                                                                                                                                                                                                                                                                          |                                |                                 |                            |
|                               | Bout 1                                                                                                                                                                                                                                                                                                                                                                                                                                                                                                                                                                                                                                                                                                                                                                                                                                                                                                                                                                                                                                                                                                                                                     | 23.8 (8.7) – 16.1 (9.9), d=0.8 | 25.2 (6.4) – 10.8 (8.6), d=2.0  | Non-significant difference |
|                               | Bout 2                                                                                                                                                                                                                                                                                                                                                                                                                                                                                                                                                                                                                                                                                                                                                                                                                                                                                                                                                                                                                                                                                                                                                     | Non-significant difference     | Not reported – 7.7 (8.3), d=2.4 | Non-significant difference |
| <b>Findings overview</b>      | <ul style="list-style-type: none"> <li>Pax use significantly increased plasma nicotine concentration, did not increase expired air CO concentration, and significantly reduced abstinence symptom severity in smokers</li> <li>Pax and the e-cigarette use were significantly less satisfying than cigarettes</li> </ul>                                                                                                                                                                                                                                                                                                                                                                                                                                                                                                                                                                                                                                                                                                                                                                                                                                   |                                |                                 |                            |
| <b>Authors, study year</b>    | <b>Brossard et al., 2017 [3]</b>                                                                                                                                                                                                                                                                                                                                                                                                                                                                                                                                                                                                                                                                                                                                                                                                                                                                                                                                                                                                                                                                                                                           |                                |                                 |                            |
| <b>Funder/Affiliations</b>    | <b>Affiliations:</b> Philip Morris International R&D, Philip Morris Products S.A., Neuchatel, Switzerland                                                                                                                                                                                                                                                                                                                                                                                                                                                                                                                                                                                                                                                                                                                                                                                                                                                                                                                                                                                                                                                  |                                |                                 |                            |
| <b>Primary aim</b>            | To compare nicotine delivery and effects on urge to smoke                                                                                                                                                                                                                                                                                                                                                                                                                                                                                                                                                                                                                                                                                                                                                                                                                                                                                                                                                                                                                                                                                                  |                                |                                 |                            |
| <b>Products used</b>          | <ul style="list-style-type: none"> <li>IQOS with regular (under ISO: 4 mg tar, 0.5 mg nicotine, 1 mg CO per stick) and menthol (5 mg tar, 0.5 mg nicotine, 1 mg CO) tobacco sticks</li> <li>Regular or menthol cigarettes preferred by participants (nicotine ISO yields <math>\leq 1</math> mg)</li> <li>Non-menthol 2 mg Nicorette® chewing gum (1.06 mg nicotine per chewed gum)</li> </ul>                                                                                                                                                                                                                                                                                                                                                                                                                                                                                                                                                                                                                                                                                                                                                             |                                |                                 |                            |
| <b>Methods</b>                | <p><b>Design:</b> Randomised crossover experimental trial</p> <p><b>Recruitment:</b> via the database of the two participating clinics</p> <p><b>Study date and setting:</b> July–November 2013 at Koganeibashi Sakura Clinic, Tokyo, and August–November 2013 at Ageo Medical Clinic, Saitama, Japan</p> <p><b>Protocol registered:</b> 8 October, 2013 (NCT01959607 at clinicaltrials.gov) &amp; 18 October, 2013 (NCT01967706 at clinicaltrials.gov)</p> <p><b>Inclusion criteria:</b> healthy; 23–65 years old; smoked <math>\geq 10</math> CPD (max yield of 1 mg nicotine/cig) for the last 4 weeks; had smoked for <math>\geq 3</math> years prior recruitment; not willing to quit smoking in the forthcoming 3 months; ready to accept interruptions of smoking for up to four consecutive days, and willing to use THS and nicotine gum instead of smoking, the body mass index range of 18.5–32 kg/m<sup>2</sup>, urinary cotinine <math>\geq 200</math> ng/mL</p> <p><b>Exclusion criteria:</b> participants with clinically relevant medical conditions, with a history of alcohol and/or drug abuse, pregnant or breast feeding females.</p> |                                |                                 |                            |
| <b>Participants</b>           | 110 participants were screened for regular tobacco sticks study & 147 for menthol tobacco sticks study (Tokyo and Saitama clinics, respectively); 45/110 (41%) & 74/147 (50%) did not meet the eligibility criteria, 3/65 (5%) & 11/73 (15%) were not randomised, 2/62 (3%) & 1/62 (2%) dropped out<br>N(regular)=60 & N(menthol)=61, 52.5% & 55.0% male, mean age 34 $\pm$ 9.18 & 32.6 $\pm$ 9.44, 56.7% & 59% smoked $\leq 20$ CPD.                                                                                                                                                                                                                                                                                                                                                                                                                                                                                                                                                                                                                                                                                                                      |                                |                                 |                            |
| <b>Interventions/Exposure</b> | <p>Regular and menthol groups were randomised to four sequences: IQOS <math>\rightarrow</math> cigarette (n=22), cigarette <math>\rightarrow</math> IQOS (n=22), IQOS <math>\rightarrow</math> gum (n=9), gum <math>\rightarrow</math> IQOS (n=9)</p> <ul style="list-style-type: none"> <li>Sequence 1: 24 hour wash-out period, single use of IQOS, 24 hour wash-out period, single use of cigarette</li> </ul>                                                                                                                                                                                                                                                                                                                                                                                                                                                                                                                                                                                                                                                                                                                                          |                                |                                 |                            |

|                                 | <ul style="list-style-type: none"> <li>Sequence 2: 24 hour wash-out period, single use of cigarette, 24 hour wash-out period, single use of IQOS</li> <li>Sequence 3: 24 hour wash-out period, single use of IQOS, 24 hour wash-out period, single use of gum</li> <li>Sequence 4: 24 hour wash-out period, single use of gum, 24 hour wash-out period, single use of IQOS</li> </ul>                                                                                                                                                                                                                                                                                                                                                                                                                                                                                                                                                                                                                                                                                                                                                                                                                                                                                                                                                                                                                                                                                                                                                                                                                                                                                                                                                                                                                                                                                                                                                                                                                                                                                                                                                                                                                                                                                                                                                                                                                                                                                                                                                                                                                                                                                                                                                                                                                                                                                                                                                                                                                                                                                                                                                                                                                                                                                                                                                                                                                                                  |                           |                               |                      |                     |                               |         |         |         |         |                  |                     |                    |                      |                     |                  |                    |                     |                    |                    |                       |                    |                    |                     |                   |                            |               |              |                  |                |                           |         |  |         |  |  |         |         |                               |         |         |                               |                          |       |       |        |       |      |        |                      |      |      |       |      |      |        |                                 |       |       |       |       |       |        |                            |          |          |               |          |          |            |
|---------------------------------|----------------------------------------------------------------------------------------------------------------------------------------------------------------------------------------------------------------------------------------------------------------------------------------------------------------------------------------------------------------------------------------------------------------------------------------------------------------------------------------------------------------------------------------------------------------------------------------------------------------------------------------------------------------------------------------------------------------------------------------------------------------------------------------------------------------------------------------------------------------------------------------------------------------------------------------------------------------------------------------------------------------------------------------------------------------------------------------------------------------------------------------------------------------------------------------------------------------------------------------------------------------------------------------------------------------------------------------------------------------------------------------------------------------------------------------------------------------------------------------------------------------------------------------------------------------------------------------------------------------------------------------------------------------------------------------------------------------------------------------------------------------------------------------------------------------------------------------------------------------------------------------------------------------------------------------------------------------------------------------------------------------------------------------------------------------------------------------------------------------------------------------------------------------------------------------------------------------------------------------------------------------------------------------------------------------------------------------------------------------------------------------------------------------------------------------------------------------------------------------------------------------------------------------------------------------------------------------------------------------------------------------------------------------------------------------------------------------------------------------------------------------------------------------------------------------------------------------------------------------------------------------------------------------------------------------------------------------------------------------------------------------------------------------------------------------------------------------------------------------------------------------------------------------------------------------------------------------------------------------------------------------------------------------------------------------------------------------------------------------------------------------------------------------------------------------|---------------------------|-------------------------------|----------------------|---------------------|-------------------------------|---------|---------|---------|---------|------------------|---------------------|--------------------|----------------------|---------------------|------------------|--------------------|---------------------|--------------------|--------------------|-----------------------|--------------------|--------------------|---------------------|-------------------|----------------------------|---------------|--------------|------------------|----------------|---------------------------|---------|--|---------|--|--|---------|---------|-------------------------------|---------|---------|-------------------------------|--------------------------|-------|-------|--------|-------|------|--------|----------------------|------|------|-------|------|------|--------|---------------------------------|-------|-------|-------|-------|-------|--------|----------------------------|----------|----------|---------------|----------|----------|------------|
| <b>Outcome/Key findings</b>     | <p><b>Nicotine concentration pharmacokinetics of tobacco sticks in comparison with cigarettes and nicotine gum</b></p> <table border="1"> <thead> <tr> <th rowspan="2">Pharmacokinetic parameter</th> <th colspan="2">Ratio IQOS : Cigarette*</th> <th colspan="2">Ratio IQOS: Gum</th> </tr> <tr> <th>Regular</th> <th>Menthol</th> <th>Regular</th> <th>Menthol</th> </tr> </thead> <tbody> <tr> <td>C<sub>max</sub></td> <td>103.5% (84.9–126.1)</td> <td>88.5% (68.6–114.0)</td> <td>240.2% (130.6–441.9)</td> <td>101.6% (62.2–166.0)</td> </tr> <tr> <td>t<sub>1/2</sub></td> <td>93.1% (84.6–102.4)</td> <td>102.3% (85.3–122.7)</td> <td>87.3% (65.6–116.3)</td> <td>92.1% (73.6–115.2)</td> </tr> <tr> <td>AUC<sub>0-last</sub></td> <td>96.3% (85.1–109.1)</td> <td>98.1% (80.6–119.5)</td> <td>127.2% (77.3–209.2)</td> <td>55.9% (38.4–81.4)</td> </tr> <tr> <td>t<sub>max</sub> (minutes)</td> <td>6 min : 6 min</td> <td>6 min: 6 min</td> <td>6 min : 35.4 min</td> <td>8 min : 45 min</td> </tr> </tbody> </table> <p>* Regular tobacco sticks were compared with regular cigarettes and menthol tobacco sticks were compared with menthol cigarettes<br/> Note: C<sub>max</sub>: maximum nicotine concentration; t<sub>1/2</sub>: terminal half-life; AUC<sub>0-last</sub>: area under plasma concentration-time curve from start of product use extrapolated to the last measurable concentration; t<sub>max</sub>: time to maximum plasma concentration</p> <p><b>Nicotine concentration pharmacokinetics of regular and menthol tobacco sticks (geometric least squares means)</b></p> <table border="1"> <thead> <tr> <th rowspan="2">Pharmacokinetic parameter</th> <th colspan="2">Trial 1</th> <th colspan="3">Trial 2</th> </tr> <tr> <th>Regular</th> <th>Menthol</th> <th>Regular :<br/>Menthol<br/>ratio</th> <th>Regular</th> <th>Menthol</th> <th>Regular :<br/>Menthol<br/>ratio</th> </tr> </thead> <tbody> <tr> <td>C<sub>max</sub> (ng/mL)</td> <td>14.30</td> <td>10.70</td> <td>133.6%</td> <td>11.53</td> <td>7.64</td> <td>150.9%</td> </tr> <tr> <td>t<sub>1/2</sub> (h)</td> <td>3.81</td> <td>4.11</td> <td>92.7%</td> <td>4.16</td> <td>3.20</td> <td>130.0%</td> </tr> <tr> <td>AUC<sub>0-last</sub> (ng*h/mL)</td> <td>23.75</td> <td>23.99</td> <td>99.0%</td> <td>18.92</td> <td>15.61</td> <td>121.2%</td> </tr> <tr> <td>t<sub>max</sub> (minutes)</td> <td>Median=6</td> <td>Median=6</td> <td>no difference</td> <td>Median=6</td> <td>Median=8</td> <td>-2 minutes</td> </tr> </tbody> </table> <p>Note: C<sub>max</sub>: maximum nicotine concentration; t<sub>1/2</sub>: terminal half-life; AUC<sub>0-last</sub>: area under plasma concentration-time curve from start of product use extrapolated to the last measurable concentration; t<sub>max</sub>: time to maximum plasma concentration</p> <p><b>Urge to smoke scores after use of IQOS and gum</b></p> <ul style="list-style-type: none"> <li>Maximum suppression after start of product use: IQOS=15–30 min, cigarette=15–30 min, gum=45–60 min</li> <li>Least square mean differences (95% CI) over all time points: <ul style="list-style-type: none"> <li>IQOS (regular) - cigarette (regular) = 0.04 (-0.70–0.79)</li> <li>IQOS (menthol) - cigarette (menthol) = -0.28 (-0.79–0.22)</li> <li>IQOS (regular) - Gum = -0.20 (-0.87–0.48)</li> <li>IQOS (menthol) - Gum = -0.34 (-0.87–0.19)</li> </ul> </li> </ul> | Pharmacokinetic parameter | Ratio IQOS : Cigarette*       |                      | Ratio IQOS: Gum     |                               | Regular | Menthol | Regular | Menthol | C <sub>max</sub> | 103.5% (84.9–126.1) | 88.5% (68.6–114.0) | 240.2% (130.6–441.9) | 101.6% (62.2–166.0) | t <sub>1/2</sub> | 93.1% (84.6–102.4) | 102.3% (85.3–122.7) | 87.3% (65.6–116.3) | 92.1% (73.6–115.2) | AUC <sub>0-last</sub> | 96.3% (85.1–109.1) | 98.1% (80.6–119.5) | 127.2% (77.3–209.2) | 55.9% (38.4–81.4) | t <sub>max</sub> (minutes) | 6 min : 6 min | 6 min: 6 min | 6 min : 35.4 min | 8 min : 45 min | Pharmacokinetic parameter | Trial 1 |  | Trial 2 |  |  | Regular | Menthol | Regular :<br>Menthol<br>ratio | Regular | Menthol | Regular :<br>Menthol<br>ratio | C <sub>max</sub> (ng/mL) | 14.30 | 10.70 | 133.6% | 11.53 | 7.64 | 150.9% | t <sub>1/2</sub> (h) | 3.81 | 4.11 | 92.7% | 4.16 | 3.20 | 130.0% | AUC <sub>0-last</sub> (ng*h/mL) | 23.75 | 23.99 | 99.0% | 18.92 | 15.61 | 121.2% | t <sub>max</sub> (minutes) | Median=6 | Median=6 | no difference | Median=6 | Median=8 | -2 minutes |
|                                 | Pharmacokinetic parameter                                                                                                                                                                                                                                                                                                                                                                                                                                                                                                                                                                                                                                                                                                                                                                                                                                                                                                                                                                                                                                                                                                                                                                                                                                                                                                                                                                                                                                                                                                                                                                                                                                                                                                                                                                                                                                                                                                                                                                                                                                                                                                                                                                                                                                                                                                                                                                                                                                                                                                                                                                                                                                                                                                                                                                                                                                                                                                                                                                                                                                                                                                                                                                                                                                                                                                                                                                                                              |                           | Ratio IQOS : Cigarette*       |                      | Ratio IQOS: Gum     |                               |         |         |         |         |                  |                     |                    |                      |                     |                  |                    |                     |                    |                    |                       |                    |                    |                     |                   |                            |               |              |                  |                |                           |         |  |         |  |  |         |         |                               |         |         |                               |                          |       |       |        |       |      |        |                      |      |      |       |      |      |        |                                 |       |       |       |       |       |        |                            |          |          |               |          |          |            |
|                                 |                                                                                                                                                                                                                                                                                                                                                                                                                                                                                                                                                                                                                                                                                                                                                                                                                                                                                                                                                                                                                                                                                                                                                                                                                                                                                                                                                                                                                                                                                                                                                                                                                                                                                                                                                                                                                                                                                                                                                                                                                                                                                                                                                                                                                                                                                                                                                                                                                                                                                                                                                                                                                                                                                                                                                                                                                                                                                                                                                                                                                                                                                                                                                                                                                                                                                                                                                                                                                                        | Regular                   | Menthol                       | Regular              | Menthol             |                               |         |         |         |         |                  |                     |                    |                      |                     |                  |                    |                     |                    |                    |                       |                    |                    |                     |                   |                            |               |              |                  |                |                           |         |  |         |  |  |         |         |                               |         |         |                               |                          |       |       |        |       |      |        |                      |      |      |       |      |      |        |                                 |       |       |       |       |       |        |                            |          |          |               |          |          |            |
|                                 | C <sub>max</sub>                                                                                                                                                                                                                                                                                                                                                                                                                                                                                                                                                                                                                                                                                                                                                                                                                                                                                                                                                                                                                                                                                                                                                                                                                                                                                                                                                                                                                                                                                                                                                                                                                                                                                                                                                                                                                                                                                                                                                                                                                                                                                                                                                                                                                                                                                                                                                                                                                                                                                                                                                                                                                                                                                                                                                                                                                                                                                                                                                                                                                                                                                                                                                                                                                                                                                                                                                                                                                       | 103.5% (84.9–126.1)       | 88.5% (68.6–114.0)            | 240.2% (130.6–441.9) | 101.6% (62.2–166.0) |                               |         |         |         |         |                  |                     |                    |                      |                     |                  |                    |                     |                    |                    |                       |                    |                    |                     |                   |                            |               |              |                  |                |                           |         |  |         |  |  |         |         |                               |         |         |                               |                          |       |       |        |       |      |        |                      |      |      |       |      |      |        |                                 |       |       |       |       |       |        |                            |          |          |               |          |          |            |
| t <sub>1/2</sub>                | 93.1% (84.6–102.4)                                                                                                                                                                                                                                                                                                                                                                                                                                                                                                                                                                                                                                                                                                                                                                                                                                                                                                                                                                                                                                                                                                                                                                                                                                                                                                                                                                                                                                                                                                                                                                                                                                                                                                                                                                                                                                                                                                                                                                                                                                                                                                                                                                                                                                                                                                                                                                                                                                                                                                                                                                                                                                                                                                                                                                                                                                                                                                                                                                                                                                                                                                                                                                                                                                                                                                                                                                                                                     | 102.3% (85.3–122.7)       | 87.3% (65.6–116.3)            | 92.1% (73.6–115.2)   |                     |                               |         |         |         |         |                  |                     |                    |                      |                     |                  |                    |                     |                    |                    |                       |                    |                    |                     |                   |                            |               |              |                  |                |                           |         |  |         |  |  |         |         |                               |         |         |                               |                          |       |       |        |       |      |        |                      |      |      |       |      |      |        |                                 |       |       |       |       |       |        |                            |          |          |               |          |          |            |
| AUC <sub>0-last</sub>           | 96.3% (85.1–109.1)                                                                                                                                                                                                                                                                                                                                                                                                                                                                                                                                                                                                                                                                                                                                                                                                                                                                                                                                                                                                                                                                                                                                                                                                                                                                                                                                                                                                                                                                                                                                                                                                                                                                                                                                                                                                                                                                                                                                                                                                                                                                                                                                                                                                                                                                                                                                                                                                                                                                                                                                                                                                                                                                                                                                                                                                                                                                                                                                                                                                                                                                                                                                                                                                                                                                                                                                                                                                                     | 98.1% (80.6–119.5)        | 127.2% (77.3–209.2)           | 55.9% (38.4–81.4)    |                     |                               |         |         |         |         |                  |                     |                    |                      |                     |                  |                    |                     |                    |                    |                       |                    |                    |                     |                   |                            |               |              |                  |                |                           |         |  |         |  |  |         |         |                               |         |         |                               |                          |       |       |        |       |      |        |                      |      |      |       |      |      |        |                                 |       |       |       |       |       |        |                            |          |          |               |          |          |            |
| t <sub>max</sub> (minutes)      | 6 min : 6 min                                                                                                                                                                                                                                                                                                                                                                                                                                                                                                                                                                                                                                                                                                                                                                                                                                                                                                                                                                                                                                                                                                                                                                                                                                                                                                                                                                                                                                                                                                                                                                                                                                                                                                                                                                                                                                                                                                                                                                                                                                                                                                                                                                                                                                                                                                                                                                                                                                                                                                                                                                                                                                                                                                                                                                                                                                                                                                                                                                                                                                                                                                                                                                                                                                                                                                                                                                                                                          | 6 min: 6 min              | 6 min : 35.4 min              | 8 min : 45 min       |                     |                               |         |         |         |         |                  |                     |                    |                      |                     |                  |                    |                     |                    |                    |                       |                    |                    |                     |                   |                            |               |              |                  |                |                           |         |  |         |  |  |         |         |                               |         |         |                               |                          |       |       |        |       |      |        |                      |      |      |       |      |      |        |                                 |       |       |       |       |       |        |                            |          |          |               |          |          |            |
| Pharmacokinetic parameter       | Trial 1                                                                                                                                                                                                                                                                                                                                                                                                                                                                                                                                                                                                                                                                                                                                                                                                                                                                                                                                                                                                                                                                                                                                                                                                                                                                                                                                                                                                                                                                                                                                                                                                                                                                                                                                                                                                                                                                                                                                                                                                                                                                                                                                                                                                                                                                                                                                                                                                                                                                                                                                                                                                                                                                                                                                                                                                                                                                                                                                                                                                                                                                                                                                                                                                                                                                                                                                                                                                                                |                           | Trial 2                       |                      |                     |                               |         |         |         |         |                  |                     |                    |                      |                     |                  |                    |                     |                    |                    |                       |                    |                    |                     |                   |                            |               |              |                  |                |                           |         |  |         |  |  |         |         |                               |         |         |                               |                          |       |       |        |       |      |        |                      |      |      |       |      |      |        |                                 |       |       |       |       |       |        |                            |          |          |               |          |          |            |
|                                 | Regular                                                                                                                                                                                                                                                                                                                                                                                                                                                                                                                                                                                                                                                                                                                                                                                                                                                                                                                                                                                                                                                                                                                                                                                                                                                                                                                                                                                                                                                                                                                                                                                                                                                                                                                                                                                                                                                                                                                                                                                                                                                                                                                                                                                                                                                                                                                                                                                                                                                                                                                                                                                                                                                                                                                                                                                                                                                                                                                                                                                                                                                                                                                                                                                                                                                                                                                                                                                                                                | Menthol                   | Regular :<br>Menthol<br>ratio | Regular              | Menthol             | Regular :<br>Menthol<br>ratio |         |         |         |         |                  |                     |                    |                      |                     |                  |                    |                     |                    |                    |                       |                    |                    |                     |                   |                            |               |              |                  |                |                           |         |  |         |  |  |         |         |                               |         |         |                               |                          |       |       |        |       |      |        |                      |      |      |       |      |      |        |                                 |       |       |       |       |       |        |                            |          |          |               |          |          |            |
| C <sub>max</sub> (ng/mL)        | 14.30                                                                                                                                                                                                                                                                                                                                                                                                                                                                                                                                                                                                                                                                                                                                                                                                                                                                                                                                                                                                                                                                                                                                                                                                                                                                                                                                                                                                                                                                                                                                                                                                                                                                                                                                                                                                                                                                                                                                                                                                                                                                                                                                                                                                                                                                                                                                                                                                                                                                                                                                                                                                                                                                                                                                                                                                                                                                                                                                                                                                                                                                                                                                                                                                                                                                                                                                                                                                                                  | 10.70                     | 133.6%                        | 11.53                | 7.64                | 150.9%                        |         |         |         |         |                  |                     |                    |                      |                     |                  |                    |                     |                    |                    |                       |                    |                    |                     |                   |                            |               |              |                  |                |                           |         |  |         |  |  |         |         |                               |         |         |                               |                          |       |       |        |       |      |        |                      |      |      |       |      |      |        |                                 |       |       |       |       |       |        |                            |          |          |               |          |          |            |
| t <sub>1/2</sub> (h)            | 3.81                                                                                                                                                                                                                                                                                                                                                                                                                                                                                                                                                                                                                                                                                                                                                                                                                                                                                                                                                                                                                                                                                                                                                                                                                                                                                                                                                                                                                                                                                                                                                                                                                                                                                                                                                                                                                                                                                                                                                                                                                                                                                                                                                                                                                                                                                                                                                                                                                                                                                                                                                                                                                                                                                                                                                                                                                                                                                                                                                                                                                                                                                                                                                                                                                                                                                                                                                                                                                                   | 4.11                      | 92.7%                         | 4.16                 | 3.20                | 130.0%                        |         |         |         |         |                  |                     |                    |                      |                     |                  |                    |                     |                    |                    |                       |                    |                    |                     |                   |                            |               |              |                  |                |                           |         |  |         |  |  |         |         |                               |         |         |                               |                          |       |       |        |       |      |        |                      |      |      |       |      |      |        |                                 |       |       |       |       |       |        |                            |          |          |               |          |          |            |
| AUC <sub>0-last</sub> (ng*h/mL) | 23.75                                                                                                                                                                                                                                                                                                                                                                                                                                                                                                                                                                                                                                                                                                                                                                                                                                                                                                                                                                                                                                                                                                                                                                                                                                                                                                                                                                                                                                                                                                                                                                                                                                                                                                                                                                                                                                                                                                                                                                                                                                                                                                                                                                                                                                                                                                                                                                                                                                                                                                                                                                                                                                                                                                                                                                                                                                                                                                                                                                                                                                                                                                                                                                                                                                                                                                                                                                                                                                  | 23.99                     | 99.0%                         | 18.92                | 15.61               | 121.2%                        |         |         |         |         |                  |                     |                    |                      |                     |                  |                    |                     |                    |                    |                       |                    |                    |                     |                   |                            |               |              |                  |                |                           |         |  |         |  |  |         |         |                               |         |         |                               |                          |       |       |        |       |      |        |                      |      |      |       |      |      |        |                                 |       |       |       |       |       |        |                            |          |          |               |          |          |            |
| t <sub>max</sub> (minutes)      | Median=6                                                                                                                                                                                                                                                                                                                                                                                                                                                                                                                                                                                                                                                                                                                                                                                                                                                                                                                                                                                                                                                                                                                                                                                                                                                                                                                                                                                                                                                                                                                                                                                                                                                                                                                                                                                                                                                                                                                                                                                                                                                                                                                                                                                                                                                                                                                                                                                                                                                                                                                                                                                                                                                                                                                                                                                                                                                                                                                                                                                                                                                                                                                                                                                                                                                                                                                                                                                                                               | Median=6                  | no difference                 | Median=6             | Median=8            | -2 minutes                    |         |         |         |         |                  |                     |                    |                      |                     |                  |                    |                     |                    |                    |                       |                    |                    |                     |                   |                            |               |              |                  |                |                           |         |  |         |  |  |         |         |                               |         |         |                               |                          |       |       |        |       |      |        |                      |      |      |       |      |      |        |                                 |       |       |       |       |       |        |                            |          |          |               |          |          |            |
| <b>Findings overview</b>        | <ul style="list-style-type: none"> <li>Use of regular and menthol IQOS provided similar peak and total exposure to nicotine concentrations when compared with smoking regular</li> </ul>                                                                                                                                                                                                                                                                                                                                                                                                                                                                                                                                                                                                                                                                                                                                                                                                                                                                                                                                                                                                                                                                                                                                                                                                                                                                                                                                                                                                                                                                                                                                                                                                                                                                                                                                                                                                                                                                                                                                                                                                                                                                                                                                                                                                                                                                                                                                                                                                                                                                                                                                                                                                                                                                                                                                                                                                                                                                                                                                                                                                                                                                                                                                                                                                                                               |                           |                               |                      |                     |                               |         |         |         |         |                  |                     |                    |                      |                     |                  |                    |                     |                    |                    |                       |                    |                    |                     |                   |                            |               |              |                  |                |                           |         |  |         |  |  |         |         |                               |         |         |                               |                          |       |       |        |       |      |        |                      |      |      |       |      |      |        |                                 |       |       |       |       |       |        |                            |          |          |               |          |          |            |

|                                                 | <p>and menthol cigarettes</p> <ul style="list-style-type: none"> <li>• When compared with nicotine gum, regular IQOS provided twice as high peak nicotine concentration than gum, while menthol IQOS and gum peak nicotine concentrations were similar. Regular IQOS use provide slightly longer exposure to nicotine concentrations than chewing nicotine gum, while after using menthol IQOS total exposure to nicotine is almost twice as shorter than using nicotine gum.</li> <li>• Time to maximum plasma nicotine concentration was comparable between IQOS and cigarettes (around 6 minutes) but six times longer for nicotine gum (35–45 minutes)</li> <li>• Nicotine half-life was comparable between using both types of IQOS tobacco sticks, cigarettes and nicotine gum</li> <li>• Gum, cigarettes and regular and menthol IQOS reduced urges to smoke similarly</li> </ul>                                                                                            |                                                 |                                                               |  |  |               |                  |      |                     |                   |                   |                   |
|-------------------------------------------------|-------------------------------------------------------------------------------------------------------------------------------------------------------------------------------------------------------------------------------------------------------------------------------------------------------------------------------------------------------------------------------------------------------------------------------------------------------------------------------------------------------------------------------------------------------------------------------------------------------------------------------------------------------------------------------------------------------------------------------------------------------------------------------------------------------------------------------------------------------------------------------------------------------------------------------------------------------------------------------------|-------------------------------------------------|---------------------------------------------------------------|--|--|---------------|------------------|------|---------------------|-------------------|-------------------|-------------------|
| <b>Authors, study year</b>                      | <b>Haziza et al., 2016 [8]</b>                                                                                                                                                                                                                                                                                                                                                                                                                                                                                                                                                                                                                                                                                                                                                                                                                                                                                                                                                      |                                                 |                                                               |  |  |               |                  |      |                     |                   |                   |                   |
| <b>Funder/Affiliations</b>                      | <b>Affiliations:</b> Philip Morris International R&D, Philip Morris Products S.A., Neuchatel, Switzerland                                                                                                                                                                                                                                                                                                                                                                                                                                                                                                                                                                                                                                                                                                                                                                                                                                                                           |                                                 |                                                               |  |  |               |                  |      |                     |                   |                   |                   |
| <b>Primary aim</b>                              | To compare exposure to HPHC during 5 days of use                                                                                                                                                                                                                                                                                                                                                                                                                                                                                                                                                                                                                                                                                                                                                                                                                                                                                                                                    |                                                 |                                                               |  |  |               |                  |      |                     |                   |                   |                   |
| <b>Products used</b>                            | <ul style="list-style-type: none"> <li>• IQOS</li> <li>• Cigarette: participants' preferred brand</li> </ul>                                                                                                                                                                                                                                                                                                                                                                                                                                                                                                                                                                                                                                                                                                                                                                                                                                                                        |                                                 |                                                               |  |  |               |                  |      |                     |                   |                   |                   |
| <b>Methods</b>                                  | <p><b>Design:</b> Randomised controlled trial<br/> <b>Recruitment:</b> via the clinical site's database and through advertisements<br/> <b>Study date and setting:</b> July 2013, Higashi Shinjuku Clinic, Tokyo, Japan<br/> <b>Protocol registered:</b> 18 October, 2013 (NCT01970982 at clinicaltrials.gov)<br/> <b>Inclusion criteria:</b> healthy; 23–65 years old; smoked ≥10 non-mentholated CPD (max yield of 1 mg nicotine/cig) for the last 4 weeks; had smoked for ≥3 years prior recruitment; not willing to quit smoking in the forthcoming 3 months; ready to accept a 5-day smoking interruption<br/> <b>Exclusion criteria:</b> participants with clinically relevant medical conditions, those who required medical interventions (start of treatment, surgery, or hospitalization), a history of alcohol and/or drug abuse, used nicotine containing products other than cigarettes, pregnant or breast feeding, and females not using effective contraception</p> |                                                 |                                                               |  |  |               |                  |      |                     |                   |                   |                   |
| <b>Participants</b>                             | <p>267 screened; 101/267 (38%) did not meet eligibility criteria; 6/166 (4%) dropped out before randomisation<br/> N=160; 50% male; mean age 37.1; mean FTND=4.4<br/> Dropped out: 2/40 in abstinence group</p>                                                                                                                                                                                                                                                                                                                                                                                                                                                                                                                                                                                                                                                                                                                                                                     |                                                 |                                                               |  |  |               |                  |      |                     |                   |                   |                   |
| <b>Interventions/Exposure</b>                   | <p>Randomised 2:1:1 to IQOS (n=80), cigarette (n=40), and abstinence (n=40) conditions for 5 days in confinement.</p> <ul style="list-style-type: none"> <li>• IQOS group participants were asked to <i>ad libitum</i> use exclusively IQOS tobacco product</li> <li>• Cigarette group participants were asked to <i>ad libitum</i> use exclusively their own brand of cigarettes</li> <li>• Abstinence group participants were asked to completely abstain from smoking for five days. The use of nicotine replacement therapy was not allowed</li> </ul>                                                                                                                                                                                                                                                                                                                                                                                                                          |                                                 |                                                               |  |  |               |                  |      |                     |                   |                   |                   |
| <b>Outcome/Key findings</b>                     | <p><b>Levels of biomarkers of exposure to HPHC at day 5 in smoking, abstinence and IQOS groups</b></p> <table border="1"> <thead> <tr> <th rowspan="2">Parent harmful and potentially harmful compound</th> <th colspan="3">Geometric mean (95% CI) of exposure levels to HPHC biomarkers</th> </tr> <tr> <th>Smoking group</th> <th>Abstinence group</th> <th>IQOS</th> </tr> </thead> <tbody> <tr> <td>Carbon monoxide (%)</td> <td>5.14 (4.66; 5.66)</td> <td>2.37 (2.28; 2.47)</td> <td>2.39 (2.32; 2.46)</td> </tr> </tbody> </table>                                                                                                                                                                                                                                                                                                                                                                                                                                          | Parent harmful and potentially harmful compound | Geometric mean (95% CI) of exposure levels to HPHC biomarkers |  |  | Smoking group | Abstinence group | IQOS | Carbon monoxide (%) | 5.14 (4.66; 5.66) | 2.37 (2.28; 2.47) | 2.39 (2.32; 2.46) |
| Parent harmful and potentially harmful compound | Geometric mean (95% CI) of exposure levels to HPHC biomarkers                                                                                                                                                                                                                                                                                                                                                                                                                                                                                                                                                                                                                                                                                                                                                                                                                                                                                                                       |                                                 |                                                               |  |  |               |                  |      |                     |                   |                   |                   |
|                                                 | Smoking group                                                                                                                                                                                                                                                                                                                                                                                                                                                                                                                                                                                                                                                                                                                                                                                                                                                                                                                                                                       | Abstinence group                                | IQOS                                                          |  |  |               |                  |      |                     |                   |                   |                   |
| Carbon monoxide (%)                             | 5.14 (4.66; 5.66)                                                                                                                                                                                                                                                                                                                                                                                                                                                                                                                                                                                                                                                                                                                                                                                                                                                                                                                                                                   | 2.37 (2.28; 2.47)                               | 2.39 (2.32; 2.46)                                             |  |  |               |                  |      |                     |                   |                   |                   |

|                                                                                                                                                                                                                                                                                                                                                                                                                                                                                                 |                                      |                             |                          |
|-------------------------------------------------------------------------------------------------------------------------------------------------------------------------------------------------------------------------------------------------------------------------------------------------------------------------------------------------------------------------------------------------------------------------------------------------------------------------------------------------|--------------------------------------|-----------------------------|--------------------------|
| Acrolein (ng/mg creat)                                                                                                                                                                                                                                                                                                                                                                                                                                                                          | 599.67 (511.70; 702.76)              | 199.04 (173.02; 228.97)     | 311.08 (279.59; 346.12)  |
| 1,3-butadiene (pg/mg creat)                                                                                                                                                                                                                                                                                                                                                                                                                                                                     | 450.19 (300.07; 675.42)              | 92.18 (80.18; 105.98)       | 107.39 (97.24; 118.60)   |
| Benzene (pg/mg creat)                                                                                                                                                                                                                                                                                                                                                                                                                                                                           | 850.02 (620.40; 1164.63)             | 126.34 (105.51; 151.28)     | 143.77 (126.08; 163.93)  |
| Nicotine-derived nitrosamine ketone (NNK) (pg/mg creat)                                                                                                                                                                                                                                                                                                                                                                                                                                         | 76.55 (59.76; 98.04)                 | 28.63 (21.02; 39.00)        | 37.77 (31.43; 45.38)     |
| Pyrene (pg/mg creat)                                                                                                                                                                                                                                                                                                                                                                                                                                                                            | 149.62 (132.68; 168.72)              | 62.99 (53.07; 74.75)        | 73.02 (65.19; 81.79)     |
| N-nitrosornicotine (NNN) (pg/mg creat)                                                                                                                                                                                                                                                                                                                                                                                                                                                          | 4.64 (3.51; 6.12)                    | 0.18 (0.15; 0.22)           | 1.31 (1.06; 1.61)        |
| 4-Aminobiphenyl (pg/mg creat)                                                                                                                                                                                                                                                                                                                                                                                                                                                                   | 8.57 (7.11; 10.34)                   | 1.49 (1.29; 1.72)           | 1.53 (1.37; 1.70)        |
| 1-aminonaphthalene (pg/mg creat)                                                                                                                                                                                                                                                                                                                                                                                                                                                                | 57.08 (48.55; 67.11)                 | 2.45 (2.12; 2.82)           | 2.47 (2.23; 2.72)        |
| 2-aminonaphthalene (pg/mg creat)                                                                                                                                                                                                                                                                                                                                                                                                                                                                | 13.38 (10.93; 16.37)                 | 2.27 (1.96; 2.63)           | 2.33 (2.10; 2.59)        |
| o-toluidine (pg/mg creat)                                                                                                                                                                                                                                                                                                                                                                                                                                                                       | 98.18 (82.69; 116.57)                | 48.91 (40.56; 58.97)        | 50.4 (44.64; 56.91)      |
| Acrylonitrile (ng/mg creat)                                                                                                                                                                                                                                                                                                                                                                                                                                                                     | 54.19 (43.47; 67.55)                 | 9.04 (7.05; 11.60)          | 10.61 (9.17; 12.29)      |
| Ethylene oxide (pg/mg creat)                                                                                                                                                                                                                                                                                                                                                                                                                                                                    | 2099.41(1614.33;2730.24)             | 806.29 (666.35; 975.61)     | 997.76 (866.57; 1148.82) |
| Crotonaldehyde (ng/mg creat)                                                                                                                                                                                                                                                                                                                                                                                                                                                                    | 157.83 (128.07; 194.51)              | 47.84 (40.62; 56.34)        | 59.51 (53.40; 66.30)     |
| Benzo(a)pyrene (fg/mg creat)                                                                                                                                                                                                                                                                                                                                                                                                                                                                    | 96.42 (80.55; 115.41)                | 24.47 (20.70; 28.91)        | 29.52 (26.01; 33.50)     |
| Nicotine equivalents (mg/g creat)                                                                                                                                                                                                                                                                                                                                                                                                                                                               | 5.52 (4.58; 6.66)                    | 0.15 (0.12; 0.19)           | 5.44 (4.61; 6.41)        |
| Nicotine (ng/ml)                                                                                                                                                                                                                                                                                                                                                                                                                                                                                | 21.34 (18.56; 24.55)                 | 0.10 (0.09;0.11)            | 19.13 (15.60;23.46)      |
| Cotinine (ng/ml)                                                                                                                                                                                                                                                                                                                                                                                                                                                                                | 164.30 (130.93; 206.17)              | 2.96 (1.96; 4.46)           | 161.00(131.19; 197.57)   |
| Note: creat: creatinine                                                                                                                                                                                                                                                                                                                                                                                                                                                                         |                                      |                             |                          |
| <b>Daily use of tobacco sticks and cigarettes</b>                                                                                                                                                                                                                                                                                                                                                                                                                                               |                                      |                             |                          |
| <b>Time</b>                                                                                                                                                                                                                                                                                                                                                                                                                                                                                     | <b>Mean (SD) IQOS tobacco sticks</b> | <b>Mean (SD) cigarettes</b> | <b>% IQOS:Cigarettes</b> |
| Day 1                                                                                                                                                                                                                                                                                                                                                                                                                                                                                           | 8.3 (3.0)                            | 10.6 (3.1)                  | 78.3%                    |
| Day 5                                                                                                                                                                                                                                                                                                                                                                                                                                                                                           | 9.9 (3.9)                            | 12.5 (3.5)                  | 79.2%                    |
| <b>Human puffing topography:</b>                                                                                                                                                                                                                                                                                                                                                                                                                                                                |                                      |                             |                          |
| <ul style="list-style-type: none"> <li>• At day 1, IQOS group compared with cigarette group: <ul style="list-style-type: none"> <li>○ Average puff volume 25% lower</li> <li>○ Total puff volume 18% lower</li> <li>○ Number of puffs 11% higher</li> <li>○ Puff frequency 18% higher</li> <li>○ Puff duration 11% longer</li> </ul> </li> <li>• At day 4: IQOS group compared with cigarette group: <ul style="list-style-type: none"> <li>○ Number of puffs 19% higher</li> </ul> </li> </ul> |                                      |                             |                          |

|                               |                                                                                                                                                                                                                                                                                                                                                                                                                                                                                                                                                                                                                                                                                                                                                                                                                                                                                                                                                                                                                                                 |
|-------------------------------|-------------------------------------------------------------------------------------------------------------------------------------------------------------------------------------------------------------------------------------------------------------------------------------------------------------------------------------------------------------------------------------------------------------------------------------------------------------------------------------------------------------------------------------------------------------------------------------------------------------------------------------------------------------------------------------------------------------------------------------------------------------------------------------------------------------------------------------------------------------------------------------------------------------------------------------------------------------------------------------------------------------------------------------------------|
|                               | <ul style="list-style-type: none"> <li>○ Puff frequency 27% higher</li> <li>○ Puff duration 23% longer</li> </ul> <p><b>Differences in modified cigarette evaluation subscales' scores (IQOS - cigarette):</b></p> <ul style="list-style-type: none"> <li>● Smoking satisfaction: <b>-0.69 (-1.04, -0.34)</b></li> <li>● Aversion: 0.01 (-0.19, 0.21)</li> <li>● Craving reduction: -0.17 (-0.59, 0.25)</li> <li>● Enjoyment of respiratory tract sensation: -0.34 (-0.74, 0.06)</li> <li>● Psychological reward: -0.18 (-0.42, 0.07)</li> </ul> <ul style="list-style-type: none"> <li>● Mean urges to smoke scores in IQOS, cigarette, and abstinence groups: 4.13, 4.13, and 3.98, respectively</li> </ul>                                                                                                                                                                                                                                                                                                                                   |
| <b>Findings overview</b>      | <ul style="list-style-type: none"> <li>● Switching for five days from cigarette smoking to using IQOS reduced exposure to HPHC</li> <li>● Nicotine uptake was similar between IQOS and cigarette group participants</li> <li>● Participants scored IQOS lower on four out of five subjective experience subscales than cigarettes and IQOS was significantly less satisfying than cigarettes</li> </ul>                                                                                                                                                                                                                                                                                                                                                                                                                                                                                                                                                                                                                                         |
| <b>Authors, study year</b>    | <b>Haziza et al., 2016 [9]</b>                                                                                                                                                                                                                                                                                                                                                                                                                                                                                                                                                                                                                                                                                                                                                                                                                                                                                                                                                                                                                  |
| <b>Funder/Affiliations</b>    | <b>Affiliations:</b> Philip Morris International R&D, Philip Morris Products S.A., Neuchatel, Switzerland                                                                                                                                                                                                                                                                                                                                                                                                                                                                                                                                                                                                                                                                                                                                                                                                                                                                                                                                       |
| <b>Primary aim</b>            | To compare exposure to HPHC during 5 days of use                                                                                                                                                                                                                                                                                                                                                                                                                                                                                                                                                                                                                                                                                                                                                                                                                                                                                                                                                                                                |
| <b>Products used</b>          | <ul style="list-style-type: none"> <li>● IQOS</li> <li>● Participants' preferred brand of non-menthol cigarettes</li> </ul>                                                                                                                                                                                                                                                                                                                                                                                                                                                                                                                                                                                                                                                                                                                                                                                                                                                                                                                     |
| <b>Methods</b>                | <p><b>Design:</b> Randomised controlled trial</p> <p><b>Recruitment:</b> via the clinical site's database and through advertisements</p> <p><b>Study date and Setting:</b> June–September, 2013, BioVirtus Research Site, Kajetany, Poland</p> <p><b>Protocol registered:</b> 8 October, 2013 (NCT01959932 at clinicaltrials.gov)</p> <p><b>Inclusion criteria:</b> healthy Caucasian smokers; 21–65 years old; smoked ≥10 non-mentholated CPD (max yield of 1 mg nicotine/cig) for the last 4 weeks; had smoked for ≥3 years prior recruitment; not willing to quit smoking in the forthcoming 3 months; ready to accept a 5-day smoking interruption</p> <p><b>Exclusion criteria:</b> participants with clinically relevant medical conditions, those who required medical interventions (start of treatment, surgery or hospitalization), a history of alcohol and/or drug abuse, used nicotine containing products other than their own brand of cigarettes, pregnant or breast feeding, and females not using effective contraception</p> |
| <b>Participants</b>           | 329 screened; 160/329 (49%) did not meet eligibility criteria; 9/169 (5%) dropped out before randomisation<br>N=160; 50% male; mean age 34.2; mean FTND=5.1<br>Dropped out: 1/80 in IQOS group                                                                                                                                                                                                                                                                                                                                                                                                                                                                                                                                                                                                                                                                                                                                                                                                                                                  |
| <b>Interventions/Exposure</b> | Randomised 2:1:1 to IQOS (n=80), cigarette (n=41), and abstinence (n=39) conditions for 5 days in confinement.                                                                                                                                                                                                                                                                                                                                                                                                                                                                                                                                                                                                                                                                                                                                                                                                                                                                                                                                  |

|                                   | <ul style="list-style-type: none"> <li>• IQOS group participants were asked to <i>ad libitum</i> use exclusively IQOS tobacco product</li> <li>• Cigarette group participants were asked to <i>ad libitum</i> use exclusively their own brand of cigarettes</li> <li>• Abstinence group participants were asked to completely abstain from smoking for five days. The use of nicotine replacement therapy was not allowed</li> </ul>                                                                                                                                                                                                                                                                                                                                                                                                                                                                                                                                                                                                                                                                                                                                                                                                                                                                                                                                                                                                                                                                                                                                                                                                                                                                                                                                                                                                                                                                                                                                                                                                                                                                                                                                                                                                                                                                                                                                                                                                                                                                                                                                                                                                                                                                                                                                                                                                                                                                                                                                                                                                                                                                                 |                                                 |                                                               |                         |                   |               |                  |            |                     |                   |                   |                   |                        |                          |                         |                         |                             |                            |                         |                         |                       |                            |                         |                         |                                                         |                        |                      |                      |                      |                         |                      |                      |                                        |                   |                   |                   |                               |                      |                   |                  |                                  |                       |                   |                   |                                  |                      |                   |                   |                           |                         |                      |                      |                             |                       |                     |                      |                              |                            |                           |                            |                              |                         |                      |                      |                              |                         |                      |                      |                                   |                    |                   |                     |                  |                      |                   |                      |                  |                         |                   |                         |
|-----------------------------------|----------------------------------------------------------------------------------------------------------------------------------------------------------------------------------------------------------------------------------------------------------------------------------------------------------------------------------------------------------------------------------------------------------------------------------------------------------------------------------------------------------------------------------------------------------------------------------------------------------------------------------------------------------------------------------------------------------------------------------------------------------------------------------------------------------------------------------------------------------------------------------------------------------------------------------------------------------------------------------------------------------------------------------------------------------------------------------------------------------------------------------------------------------------------------------------------------------------------------------------------------------------------------------------------------------------------------------------------------------------------------------------------------------------------------------------------------------------------------------------------------------------------------------------------------------------------------------------------------------------------------------------------------------------------------------------------------------------------------------------------------------------------------------------------------------------------------------------------------------------------------------------------------------------------------------------------------------------------------------------------------------------------------------------------------------------------------------------------------------------------------------------------------------------------------------------------------------------------------------------------------------------------------------------------------------------------------------------------------------------------------------------------------------------------------------------------------------------------------------------------------------------------------------------------------------------------------------------------------------------------------------------------------------------------------------------------------------------------------------------------------------------------------------------------------------------------------------------------------------------------------------------------------------------------------------------------------------------------------------------------------------------------------------------------------------------------------------------------------------------------|-------------------------------------------------|---------------------------------------------------------------|-------------------------|-------------------|---------------|------------------|------------|---------------------|-------------------|-------------------|-------------------|------------------------|--------------------------|-------------------------|-------------------------|-----------------------------|----------------------------|-------------------------|-------------------------|-----------------------|----------------------------|-------------------------|-------------------------|---------------------------------------------------------|------------------------|----------------------|----------------------|----------------------|-------------------------|----------------------|----------------------|----------------------------------------|-------------------|-------------------|-------------------|-------------------------------|----------------------|-------------------|------------------|----------------------------------|-----------------------|-------------------|-------------------|----------------------------------|----------------------|-------------------|-------------------|---------------------------|-------------------------|----------------------|----------------------|-----------------------------|-----------------------|---------------------|----------------------|------------------------------|----------------------------|---------------------------|----------------------------|------------------------------|-------------------------|----------------------|----------------------|------------------------------|-------------------------|----------------------|----------------------|-----------------------------------|--------------------|-------------------|---------------------|------------------|----------------------|-------------------|----------------------|------------------|-------------------------|-------------------|-------------------------|
| <b>Outcome/Key findings</b>       | <p><b>Levels of biomarkers of exposure to HPHC at day 5 in smoking, abstinence and IQOS groups*</b></p> <table border="1"> <thead> <tr> <th rowspan="2">Parent harmful and potentially harmful compound</th> <th colspan="3">Geometric mean (95% CI) of exposure levels to HPHC biomarkers</th> </tr> <tr> <th>Smoking group</th> <th>Abstinence group</th> <th>IQOS group</th> </tr> </thead> <tbody> <tr> <td>Carbon monoxide (%)</td> <td>4.51 (4.05; 5.01)</td> <td>0.99 (0.95; 1.03)</td> <td>1.06 (1.03; 1.08)</td> </tr> <tr> <td>Acrolein (ng/mg creat)</td> <td>931.01 (825.73; 1049.72)</td> <td>245.69 (226.15; 266.91)</td> <td>402.26 (366.55; 441.45)</td> </tr> <tr> <td>1,3-butadiene (pg/mg creat)</td> <td>2399.40 (1884.60; 3054.83)</td> <td>163.17 (138.41; 192.36)</td> <td>192.93 (174.90; 212.83)</td> </tr> <tr> <td>Benzene (pg/mg creat)</td> <td>2922.81 (2362.80; 3615.54)</td> <td>143.70 (122.15; 169.04)</td> <td>164.45 (144.45; 187.22)</td> </tr> <tr> <td>Nicotine-derived nitrosamine ketone (NNK) (pg/mg creat)</td> <td>107.04 (85.90; 133.37)</td> <td>41.51 (31.76; 54.26)</td> <td>49.65 (42.47; 58.05)</td> </tr> <tr> <td>Pyrene (pg/mg creat)</td> <td>182.85 (161.24; 207.37)</td> <td>85.13 (75.37; 96.15)</td> <td>81.22 (74.82; 88.16)</td> </tr> <tr> <td>N-nitrosornicotine (NNN) (pg/mg creat)</td> <td>5.99 (4.94; 7.26)</td> <td>0.16 (0.14; 0.19)</td> <td>1.55 (1.17; 2.05)</td> </tr> <tr> <td>4-Aminobiphenyl (pg/mg creat)</td> <td>12.58 (11.03; 14.34)</td> <td>1.60 (1.40; 1.83)</td> <td>1.9 (1.70; 2.12)</td> </tr> <tr> <td>1-aminonaphthalene (pg/mg creat)</td> <td>89.37 (77.81; 102.64)</td> <td>2.56 (2.25; 2.90)</td> <td>3.30 (2.89; 3.78)</td> </tr> <tr> <td>2-aminonaphthalene (pg/mg creat)</td> <td>25.32 (22.27; 28.79)</td> <td>2.52 (2.23; 2.84)</td> <td>2.96 (2.67; 3.28)</td> </tr> <tr> <td>o-toluidine (pg/mg creat)</td> <td>121.16 (105.07; 139.71)</td> <td>41.64 (36.74; 47.18)</td> <td>51.15 (46.10; 56.75)</td> </tr> <tr> <td>Acrylonitrile (ng/mg creat)</td> <td>99.48 (85.79; 115.35)</td> <td>12.6 (10.12; 15.70)</td> <td>13.18 (11.37; 15.27)</td> </tr> <tr> <td>Ethylene oxide (pg/mg creat)</td> <td>4504.00 (3506.73; 5784.88)</td> <td>1248.27 (980.62; 1588.98)</td> <td>1342.40 (1140.44; 1580.12)</td> </tr> <tr> <td>Crotonaldehyde (ng/mg creat)</td> <td>376.78 (329.54; 430.80)</td> <td>63.25 (57.79; 69.22)</td> <td>86.65 (80.31; 93.49)</td> </tr> <tr> <td>Benzo(a)pyrene (fg/mg creat)</td> <td>130.29 (110.17; 154.07)</td> <td>33.64 (28.84; 39.24)</td> <td>37.07 (33.25; 41.32)</td> </tr> <tr> <td>Nicotine equivalents (mg/g creat)</td> <td>9.76 (8.54; 11.15)</td> <td>0.14 (0.12; 0.17)</td> <td>10.60 (9.34; 12.04)</td> </tr> <tr> <td>Nicotine (ng/ml)</td> <td>19.01 (16.52; 21.87)</td> <td>0.10 (0.09; 0.12)</td> <td>20.74 (17.46; 24.62)</td> </tr> <tr> <td>Cotinine (ng/ml)</td> <td>219.73 (190.21; 253.83)</td> <td>2.05 (1.56; 2.67)</td> <td>239.99 (211.30; 272.58)</td> </tr> </tbody> </table> <p>* Data from duplicate publication [30]; Note: creat: creatinine</p> | Parent harmful and potentially harmful compound | Geometric mean (95% CI) of exposure levels to HPHC biomarkers |                         |                   | Smoking group | Abstinence group | IQOS group | Carbon monoxide (%) | 4.51 (4.05; 5.01) | 0.99 (0.95; 1.03) | 1.06 (1.03; 1.08) | Acrolein (ng/mg creat) | 931.01 (825.73; 1049.72) | 245.69 (226.15; 266.91) | 402.26 (366.55; 441.45) | 1,3-butadiene (pg/mg creat) | 2399.40 (1884.60; 3054.83) | 163.17 (138.41; 192.36) | 192.93 (174.90; 212.83) | Benzene (pg/mg creat) | 2922.81 (2362.80; 3615.54) | 143.70 (122.15; 169.04) | 164.45 (144.45; 187.22) | Nicotine-derived nitrosamine ketone (NNK) (pg/mg creat) | 107.04 (85.90; 133.37) | 41.51 (31.76; 54.26) | 49.65 (42.47; 58.05) | Pyrene (pg/mg creat) | 182.85 (161.24; 207.37) | 85.13 (75.37; 96.15) | 81.22 (74.82; 88.16) | N-nitrosornicotine (NNN) (pg/mg creat) | 5.99 (4.94; 7.26) | 0.16 (0.14; 0.19) | 1.55 (1.17; 2.05) | 4-Aminobiphenyl (pg/mg creat) | 12.58 (11.03; 14.34) | 1.60 (1.40; 1.83) | 1.9 (1.70; 2.12) | 1-aminonaphthalene (pg/mg creat) | 89.37 (77.81; 102.64) | 2.56 (2.25; 2.90) | 3.30 (2.89; 3.78) | 2-aminonaphthalene (pg/mg creat) | 25.32 (22.27; 28.79) | 2.52 (2.23; 2.84) | 2.96 (2.67; 3.28) | o-toluidine (pg/mg creat) | 121.16 (105.07; 139.71) | 41.64 (36.74; 47.18) | 51.15 (46.10; 56.75) | Acrylonitrile (ng/mg creat) | 99.48 (85.79; 115.35) | 12.6 (10.12; 15.70) | 13.18 (11.37; 15.27) | Ethylene oxide (pg/mg creat) | 4504.00 (3506.73; 5784.88) | 1248.27 (980.62; 1588.98) | 1342.40 (1140.44; 1580.12) | Crotonaldehyde (ng/mg creat) | 376.78 (329.54; 430.80) | 63.25 (57.79; 69.22) | 86.65 (80.31; 93.49) | Benzo(a)pyrene (fg/mg creat) | 130.29 (110.17; 154.07) | 33.64 (28.84; 39.24) | 37.07 (33.25; 41.32) | Nicotine equivalents (mg/g creat) | 9.76 (8.54; 11.15) | 0.14 (0.12; 0.17) | 10.60 (9.34; 12.04) | Nicotine (ng/ml) | 19.01 (16.52; 21.87) | 0.10 (0.09; 0.12) | 20.74 (17.46; 24.62) | Cotinine (ng/ml) | 219.73 (190.21; 253.83) | 2.05 (1.56; 2.67) | 239.99 (211.30; 272.58) |
|                                   | Parent harmful and potentially harmful compound                                                                                                                                                                                                                                                                                                                                                                                                                                                                                                                                                                                                                                                                                                                                                                                                                                                                                                                                                                                                                                                                                                                                                                                                                                                                                                                                                                                                                                                                                                                                                                                                                                                                                                                                                                                                                                                                                                                                                                                                                                                                                                                                                                                                                                                                                                                                                                                                                                                                                                                                                                                                                                                                                                                                                                                                                                                                                                                                                                                                                                                                      |                                                 | Geometric mean (95% CI) of exposure levels to HPHC biomarkers |                         |                   |               |                  |            |                     |                   |                   |                   |                        |                          |                         |                         |                             |                            |                         |                         |                       |                            |                         |                         |                                                         |                        |                      |                      |                      |                         |                      |                      |                                        |                   |                   |                   |                               |                      |                   |                  |                                  |                       |                   |                   |                                  |                      |                   |                   |                           |                         |                      |                      |                             |                       |                     |                      |                              |                            |                           |                            |                              |                         |                      |                      |                              |                         |                      |                      |                                   |                    |                   |                     |                  |                      |                   |                      |                  |                         |                   |                         |
|                                   |                                                                                                                                                                                                                                                                                                                                                                                                                                                                                                                                                                                                                                                                                                                                                                                                                                                                                                                                                                                                                                                                                                                                                                                                                                                                                                                                                                                                                                                                                                                                                                                                                                                                                                                                                                                                                                                                                                                                                                                                                                                                                                                                                                                                                                                                                                                                                                                                                                                                                                                                                                                                                                                                                                                                                                                                                                                                                                                                                                                                                                                                                                                      | Smoking group                                   | Abstinence group                                              | IQOS group              |                   |               |                  |            |                     |                   |                   |                   |                        |                          |                         |                         |                             |                            |                         |                         |                       |                            |                         |                         |                                                         |                        |                      |                      |                      |                         |                      |                      |                                        |                   |                   |                   |                               |                      |                   |                  |                                  |                       |                   |                   |                                  |                      |                   |                   |                           |                         |                      |                      |                             |                       |                     |                      |                              |                            |                           |                            |                              |                         |                      |                      |                              |                         |                      |                      |                                   |                    |                   |                     |                  |                      |                   |                      |                  |                         |                   |                         |
|                                   | Carbon monoxide (%)                                                                                                                                                                                                                                                                                                                                                                                                                                                                                                                                                                                                                                                                                                                                                                                                                                                                                                                                                                                                                                                                                                                                                                                                                                                                                                                                                                                                                                                                                                                                                                                                                                                                                                                                                                                                                                                                                                                                                                                                                                                                                                                                                                                                                                                                                                                                                                                                                                                                                                                                                                                                                                                                                                                                                                                                                                                                                                                                                                                                                                                                                                  | 4.51 (4.05; 5.01)                               | 0.99 (0.95; 1.03)                                             | 1.06 (1.03; 1.08)       |                   |               |                  |            |                     |                   |                   |                   |                        |                          |                         |                         |                             |                            |                         |                         |                       |                            |                         |                         |                                                         |                        |                      |                      |                      |                         |                      |                      |                                        |                   |                   |                   |                               |                      |                   |                  |                                  |                       |                   |                   |                                  |                      |                   |                   |                           |                         |                      |                      |                             |                       |                     |                      |                              |                            |                           |                            |                              |                         |                      |                      |                              |                         |                      |                      |                                   |                    |                   |                     |                  |                      |                   |                      |                  |                         |                   |                         |
|                                   | Acrolein (ng/mg creat)                                                                                                                                                                                                                                                                                                                                                                                                                                                                                                                                                                                                                                                                                                                                                                                                                                                                                                                                                                                                                                                                                                                                                                                                                                                                                                                                                                                                                                                                                                                                                                                                                                                                                                                                                                                                                                                                                                                                                                                                                                                                                                                                                                                                                                                                                                                                                                                                                                                                                                                                                                                                                                                                                                                                                                                                                                                                                                                                                                                                                                                                                               | 931.01 (825.73; 1049.72)                        | 245.69 (226.15; 266.91)                                       | 402.26 (366.55; 441.45) |                   |               |                  |            |                     |                   |                   |                   |                        |                          |                         |                         |                             |                            |                         |                         |                       |                            |                         |                         |                                                         |                        |                      |                      |                      |                         |                      |                      |                                        |                   |                   |                   |                               |                      |                   |                  |                                  |                       |                   |                   |                                  |                      |                   |                   |                           |                         |                      |                      |                             |                       |                     |                      |                              |                            |                           |                            |                              |                         |                      |                      |                              |                         |                      |                      |                                   |                    |                   |                     |                  |                      |                   |                      |                  |                         |                   |                         |
|                                   | 1,3-butadiene (pg/mg creat)                                                                                                                                                                                                                                                                                                                                                                                                                                                                                                                                                                                                                                                                                                                                                                                                                                                                                                                                                                                                                                                                                                                                                                                                                                                                                                                                                                                                                                                                                                                                                                                                                                                                                                                                                                                                                                                                                                                                                                                                                                                                                                                                                                                                                                                                                                                                                                                                                                                                                                                                                                                                                                                                                                                                                                                                                                                                                                                                                                                                                                                                                          | 2399.40 (1884.60; 3054.83)                      | 163.17 (138.41; 192.36)                                       | 192.93 (174.90; 212.83) |                   |               |                  |            |                     |                   |                   |                   |                        |                          |                         |                         |                             |                            |                         |                         |                       |                            |                         |                         |                                                         |                        |                      |                      |                      |                         |                      |                      |                                        |                   |                   |                   |                               |                      |                   |                  |                                  |                       |                   |                   |                                  |                      |                   |                   |                           |                         |                      |                      |                             |                       |                     |                      |                              |                            |                           |                            |                              |                         |                      |                      |                              |                         |                      |                      |                                   |                    |                   |                     |                  |                      |                   |                      |                  |                         |                   |                         |
|                                   | Benzene (pg/mg creat)                                                                                                                                                                                                                                                                                                                                                                                                                                                                                                                                                                                                                                                                                                                                                                                                                                                                                                                                                                                                                                                                                                                                                                                                                                                                                                                                                                                                                                                                                                                                                                                                                                                                                                                                                                                                                                                                                                                                                                                                                                                                                                                                                                                                                                                                                                                                                                                                                                                                                                                                                                                                                                                                                                                                                                                                                                                                                                                                                                                                                                                                                                | 2922.81 (2362.80; 3615.54)                      | 143.70 (122.15; 169.04)                                       | 164.45 (144.45; 187.22) |                   |               |                  |            |                     |                   |                   |                   |                        |                          |                         |                         |                             |                            |                         |                         |                       |                            |                         |                         |                                                         |                        |                      |                      |                      |                         |                      |                      |                                        |                   |                   |                   |                               |                      |                   |                  |                                  |                       |                   |                   |                                  |                      |                   |                   |                           |                         |                      |                      |                             |                       |                     |                      |                              |                            |                           |                            |                              |                         |                      |                      |                              |                         |                      |                      |                                   |                    |                   |                     |                  |                      |                   |                      |                  |                         |                   |                         |
|                                   | Nicotine-derived nitrosamine ketone (NNK) (pg/mg creat)                                                                                                                                                                                                                                                                                                                                                                                                                                                                                                                                                                                                                                                                                                                                                                                                                                                                                                                                                                                                                                                                                                                                                                                                                                                                                                                                                                                                                                                                                                                                                                                                                                                                                                                                                                                                                                                                                                                                                                                                                                                                                                                                                                                                                                                                                                                                                                                                                                                                                                                                                                                                                                                                                                                                                                                                                                                                                                                                                                                                                                                              | 107.04 (85.90; 133.37)                          | 41.51 (31.76; 54.26)                                          | 49.65 (42.47; 58.05)    |                   |               |                  |            |                     |                   |                   |                   |                        |                          |                         |                         |                             |                            |                         |                         |                       |                            |                         |                         |                                                         |                        |                      |                      |                      |                         |                      |                      |                                        |                   |                   |                   |                               |                      |                   |                  |                                  |                       |                   |                   |                                  |                      |                   |                   |                           |                         |                      |                      |                             |                       |                     |                      |                              |                            |                           |                            |                              |                         |                      |                      |                              |                         |                      |                      |                                   |                    |                   |                     |                  |                      |                   |                      |                  |                         |                   |                         |
|                                   | Pyrene (pg/mg creat)                                                                                                                                                                                                                                                                                                                                                                                                                                                                                                                                                                                                                                                                                                                                                                                                                                                                                                                                                                                                                                                                                                                                                                                                                                                                                                                                                                                                                                                                                                                                                                                                                                                                                                                                                                                                                                                                                                                                                                                                                                                                                                                                                                                                                                                                                                                                                                                                                                                                                                                                                                                                                                                                                                                                                                                                                                                                                                                                                                                                                                                                                                 | 182.85 (161.24; 207.37)                         | 85.13 (75.37; 96.15)                                          | 81.22 (74.82; 88.16)    |                   |               |                  |            |                     |                   |                   |                   |                        |                          |                         |                         |                             |                            |                         |                         |                       |                            |                         |                         |                                                         |                        |                      |                      |                      |                         |                      |                      |                                        |                   |                   |                   |                               |                      |                   |                  |                                  |                       |                   |                   |                                  |                      |                   |                   |                           |                         |                      |                      |                             |                       |                     |                      |                              |                            |                           |                            |                              |                         |                      |                      |                              |                         |                      |                      |                                   |                    |                   |                     |                  |                      |                   |                      |                  |                         |                   |                         |
|                                   | N-nitrosornicotine (NNN) (pg/mg creat)                                                                                                                                                                                                                                                                                                                                                                                                                                                                                                                                                                                                                                                                                                                                                                                                                                                                                                                                                                                                                                                                                                                                                                                                                                                                                                                                                                                                                                                                                                                                                                                                                                                                                                                                                                                                                                                                                                                                                                                                                                                                                                                                                                                                                                                                                                                                                                                                                                                                                                                                                                                                                                                                                                                                                                                                                                                                                                                                                                                                                                                                               | 5.99 (4.94; 7.26)                               | 0.16 (0.14; 0.19)                                             | 1.55 (1.17; 2.05)       |                   |               |                  |            |                     |                   |                   |                   |                        |                          |                         |                         |                             |                            |                         |                         |                       |                            |                         |                         |                                                         |                        |                      |                      |                      |                         |                      |                      |                                        |                   |                   |                   |                               |                      |                   |                  |                                  |                       |                   |                   |                                  |                      |                   |                   |                           |                         |                      |                      |                             |                       |                     |                      |                              |                            |                           |                            |                              |                         |                      |                      |                              |                         |                      |                      |                                   |                    |                   |                     |                  |                      |                   |                      |                  |                         |                   |                         |
|                                   | 4-Aminobiphenyl (pg/mg creat)                                                                                                                                                                                                                                                                                                                                                                                                                                                                                                                                                                                                                                                                                                                                                                                                                                                                                                                                                                                                                                                                                                                                                                                                                                                                                                                                                                                                                                                                                                                                                                                                                                                                                                                                                                                                                                                                                                                                                                                                                                                                                                                                                                                                                                                                                                                                                                                                                                                                                                                                                                                                                                                                                                                                                                                                                                                                                                                                                                                                                                                                                        | 12.58 (11.03; 14.34)                            | 1.60 (1.40; 1.83)                                             | 1.9 (1.70; 2.12)        |                   |               |                  |            |                     |                   |                   |                   |                        |                          |                         |                         |                             |                            |                         |                         |                       |                            |                         |                         |                                                         |                        |                      |                      |                      |                         |                      |                      |                                        |                   |                   |                   |                               |                      |                   |                  |                                  |                       |                   |                   |                                  |                      |                   |                   |                           |                         |                      |                      |                             |                       |                     |                      |                              |                            |                           |                            |                              |                         |                      |                      |                              |                         |                      |                      |                                   |                    |                   |                     |                  |                      |                   |                      |                  |                         |                   |                         |
|                                   | 1-aminonaphthalene (pg/mg creat)                                                                                                                                                                                                                                                                                                                                                                                                                                                                                                                                                                                                                                                                                                                                                                                                                                                                                                                                                                                                                                                                                                                                                                                                                                                                                                                                                                                                                                                                                                                                                                                                                                                                                                                                                                                                                                                                                                                                                                                                                                                                                                                                                                                                                                                                                                                                                                                                                                                                                                                                                                                                                                                                                                                                                                                                                                                                                                                                                                                                                                                                                     | 89.37 (77.81; 102.64)                           | 2.56 (2.25; 2.90)                                             | 3.30 (2.89; 3.78)       |                   |               |                  |            |                     |                   |                   |                   |                        |                          |                         |                         |                             |                            |                         |                         |                       |                            |                         |                         |                                                         |                        |                      |                      |                      |                         |                      |                      |                                        |                   |                   |                   |                               |                      |                   |                  |                                  |                       |                   |                   |                                  |                      |                   |                   |                           |                         |                      |                      |                             |                       |                     |                      |                              |                            |                           |                            |                              |                         |                      |                      |                              |                         |                      |                      |                                   |                    |                   |                     |                  |                      |                   |                      |                  |                         |                   |                         |
|                                   | 2-aminonaphthalene (pg/mg creat)                                                                                                                                                                                                                                                                                                                                                                                                                                                                                                                                                                                                                                                                                                                                                                                                                                                                                                                                                                                                                                                                                                                                                                                                                                                                                                                                                                                                                                                                                                                                                                                                                                                                                                                                                                                                                                                                                                                                                                                                                                                                                                                                                                                                                                                                                                                                                                                                                                                                                                                                                                                                                                                                                                                                                                                                                                                                                                                                                                                                                                                                                     | 25.32 (22.27; 28.79)                            | 2.52 (2.23; 2.84)                                             | 2.96 (2.67; 3.28)       |                   |               |                  |            |                     |                   |                   |                   |                        |                          |                         |                         |                             |                            |                         |                         |                       |                            |                         |                         |                                                         |                        |                      |                      |                      |                         |                      |                      |                                        |                   |                   |                   |                               |                      |                   |                  |                                  |                       |                   |                   |                                  |                      |                   |                   |                           |                         |                      |                      |                             |                       |                     |                      |                              |                            |                           |                            |                              |                         |                      |                      |                              |                         |                      |                      |                                   |                    |                   |                     |                  |                      |                   |                      |                  |                         |                   |                         |
|                                   | o-toluidine (pg/mg creat)                                                                                                                                                                                                                                                                                                                                                                                                                                                                                                                                                                                                                                                                                                                                                                                                                                                                                                                                                                                                                                                                                                                                                                                                                                                                                                                                                                                                                                                                                                                                                                                                                                                                                                                                                                                                                                                                                                                                                                                                                                                                                                                                                                                                                                                                                                                                                                                                                                                                                                                                                                                                                                                                                                                                                                                                                                                                                                                                                                                                                                                                                            | 121.16 (105.07; 139.71)                         | 41.64 (36.74; 47.18)                                          | 51.15 (46.10; 56.75)    |                   |               |                  |            |                     |                   |                   |                   |                        |                          |                         |                         |                             |                            |                         |                         |                       |                            |                         |                         |                                                         |                        |                      |                      |                      |                         |                      |                      |                                        |                   |                   |                   |                               |                      |                   |                  |                                  |                       |                   |                   |                                  |                      |                   |                   |                           |                         |                      |                      |                             |                       |                     |                      |                              |                            |                           |                            |                              |                         |                      |                      |                              |                         |                      |                      |                                   |                    |                   |                     |                  |                      |                   |                      |                  |                         |                   |                         |
|                                   | Acrylonitrile (ng/mg creat)                                                                                                                                                                                                                                                                                                                                                                                                                                                                                                                                                                                                                                                                                                                                                                                                                                                                                                                                                                                                                                                                                                                                                                                                                                                                                                                                                                                                                                                                                                                                                                                                                                                                                                                                                                                                                                                                                                                                                                                                                                                                                                                                                                                                                                                                                                                                                                                                                                                                                                                                                                                                                                                                                                                                                                                                                                                                                                                                                                                                                                                                                          | 99.48 (85.79; 115.35)                           | 12.6 (10.12; 15.70)                                           | 13.18 (11.37; 15.27)    |                   |               |                  |            |                     |                   |                   |                   |                        |                          |                         |                         |                             |                            |                         |                         |                       |                            |                         |                         |                                                         |                        |                      |                      |                      |                         |                      |                      |                                        |                   |                   |                   |                               |                      |                   |                  |                                  |                       |                   |                   |                                  |                      |                   |                   |                           |                         |                      |                      |                             |                       |                     |                      |                              |                            |                           |                            |                              |                         |                      |                      |                              |                         |                      |                      |                                   |                    |                   |                     |                  |                      |                   |                      |                  |                         |                   |                         |
| Ethylene oxide (pg/mg creat)      | 4504.00 (3506.73; 5784.88)                                                                                                                                                                                                                                                                                                                                                                                                                                                                                                                                                                                                                                                                                                                                                                                                                                                                                                                                                                                                                                                                                                                                                                                                                                                                                                                                                                                                                                                                                                                                                                                                                                                                                                                                                                                                                                                                                                                                                                                                                                                                                                                                                                                                                                                                                                                                                                                                                                                                                                                                                                                                                                                                                                                                                                                                                                                                                                                                                                                                                                                                                           | 1248.27 (980.62; 1588.98)                       | 1342.40 (1140.44; 1580.12)                                    |                         |                   |               |                  |            |                     |                   |                   |                   |                        |                          |                         |                         |                             |                            |                         |                         |                       |                            |                         |                         |                                                         |                        |                      |                      |                      |                         |                      |                      |                                        |                   |                   |                   |                               |                      |                   |                  |                                  |                       |                   |                   |                                  |                      |                   |                   |                           |                         |                      |                      |                             |                       |                     |                      |                              |                            |                           |                            |                              |                         |                      |                      |                              |                         |                      |                      |                                   |                    |                   |                     |                  |                      |                   |                      |                  |                         |                   |                         |
| Crotonaldehyde (ng/mg creat)      | 376.78 (329.54; 430.80)                                                                                                                                                                                                                                                                                                                                                                                                                                                                                                                                                                                                                                                                                                                                                                                                                                                                                                                                                                                                                                                                                                                                                                                                                                                                                                                                                                                                                                                                                                                                                                                                                                                                                                                                                                                                                                                                                                                                                                                                                                                                                                                                                                                                                                                                                                                                                                                                                                                                                                                                                                                                                                                                                                                                                                                                                                                                                                                                                                                                                                                                                              | 63.25 (57.79; 69.22)                            | 86.65 (80.31; 93.49)                                          |                         |                   |               |                  |            |                     |                   |                   |                   |                        |                          |                         |                         |                             |                            |                         |                         |                       |                            |                         |                         |                                                         |                        |                      |                      |                      |                         |                      |                      |                                        |                   |                   |                   |                               |                      |                   |                  |                                  |                       |                   |                   |                                  |                      |                   |                   |                           |                         |                      |                      |                             |                       |                     |                      |                              |                            |                           |                            |                              |                         |                      |                      |                              |                         |                      |                      |                                   |                    |                   |                     |                  |                      |                   |                      |                  |                         |                   |                         |
| Benzo(a)pyrene (fg/mg creat)      | 130.29 (110.17; 154.07)                                                                                                                                                                                                                                                                                                                                                                                                                                                                                                                                                                                                                                                                                                                                                                                                                                                                                                                                                                                                                                                                                                                                                                                                                                                                                                                                                                                                                                                                                                                                                                                                                                                                                                                                                                                                                                                                                                                                                                                                                                                                                                                                                                                                                                                                                                                                                                                                                                                                                                                                                                                                                                                                                                                                                                                                                                                                                                                                                                                                                                                                                              | 33.64 (28.84; 39.24)                            | 37.07 (33.25; 41.32)                                          |                         |                   |               |                  |            |                     |                   |                   |                   |                        |                          |                         |                         |                             |                            |                         |                         |                       |                            |                         |                         |                                                         |                        |                      |                      |                      |                         |                      |                      |                                        |                   |                   |                   |                               |                      |                   |                  |                                  |                       |                   |                   |                                  |                      |                   |                   |                           |                         |                      |                      |                             |                       |                     |                      |                              |                            |                           |                            |                              |                         |                      |                      |                              |                         |                      |                      |                                   |                    |                   |                     |                  |                      |                   |                      |                  |                         |                   |                         |
| Nicotine equivalents (mg/g creat) | 9.76 (8.54; 11.15)                                                                                                                                                                                                                                                                                                                                                                                                                                                                                                                                                                                                                                                                                                                                                                                                                                                                                                                                                                                                                                                                                                                                                                                                                                                                                                                                                                                                                                                                                                                                                                                                                                                                                                                                                                                                                                                                                                                                                                                                                                                                                                                                                                                                                                                                                                                                                                                                                                                                                                                                                                                                                                                                                                                                                                                                                                                                                                                                                                                                                                                                                                   | 0.14 (0.12; 0.17)                               | 10.60 (9.34; 12.04)                                           |                         |                   |               |                  |            |                     |                   |                   |                   |                        |                          |                         |                         |                             |                            |                         |                         |                       |                            |                         |                         |                                                         |                        |                      |                      |                      |                         |                      |                      |                                        |                   |                   |                   |                               |                      |                   |                  |                                  |                       |                   |                   |                                  |                      |                   |                   |                           |                         |                      |                      |                             |                       |                     |                      |                              |                            |                           |                            |                              |                         |                      |                      |                              |                         |                      |                      |                                   |                    |                   |                     |                  |                      |                   |                      |                  |                         |                   |                         |
| Nicotine (ng/ml)                  | 19.01 (16.52; 21.87)                                                                                                                                                                                                                                                                                                                                                                                                                                                                                                                                                                                                                                                                                                                                                                                                                                                                                                                                                                                                                                                                                                                                                                                                                                                                                                                                                                                                                                                                                                                                                                                                                                                                                                                                                                                                                                                                                                                                                                                                                                                                                                                                                                                                                                                                                                                                                                                                                                                                                                                                                                                                                                                                                                                                                                                                                                                                                                                                                                                                                                                                                                 | 0.10 (0.09; 0.12)                               | 20.74 (17.46; 24.62)                                          |                         |                   |               |                  |            |                     |                   |                   |                   |                        |                          |                         |                         |                             |                            |                         |                         |                       |                            |                         |                         |                                                         |                        |                      |                      |                      |                         |                      |                      |                                        |                   |                   |                   |                               |                      |                   |                  |                                  |                       |                   |                   |                                  |                      |                   |                   |                           |                         |                      |                      |                             |                       |                     |                      |                              |                            |                           |                            |                              |                         |                      |                      |                              |                         |                      |                      |                                   |                    |                   |                     |                  |                      |                   |                      |                  |                         |                   |                         |
| Cotinine (ng/ml)                  | 219.73 (190.21; 253.83)                                                                                                                                                                                                                                                                                                                                                                                                                                                                                                                                                                                                                                                                                                                                                                                                                                                                                                                                                                                                                                                                                                                                                                                                                                                                                                                                                                                                                                                                                                                                                                                                                                                                                                                                                                                                                                                                                                                                                                                                                                                                                                                                                                                                                                                                                                                                                                                                                                                                                                                                                                                                                                                                                                                                                                                                                                                                                                                                                                                                                                                                                              | 2.05 (1.56; 2.67)                               | 239.99 (211.30; 272.58)                                       |                         |                   |               |                  |            |                     |                   |                   |                   |                        |                          |                         |                         |                             |                            |                         |                         |                       |                            |                         |                         |                                                         |                        |                      |                      |                      |                         |                      |                      |                                        |                   |                   |                   |                               |                      |                   |                  |                                  |                       |                   |                   |                                  |                      |                   |                   |                           |                         |                      |                      |                             |                       |                     |                      |                              |                            |                           |                            |                              |                         |                      |                      |                              |                         |                      |                      |                                   |                    |                   |                     |                  |                      |                   |                      |                  |                         |                   |                         |
|                                   | <p><b>Daily use of IQOS tobacco sticks vs cigarettes</b></p> <table border="1"> <thead> <tr> <th>Time</th> <th>Mean (SD) IQOS tobacco sticks</th> <th>Mean (SD) cigarettes</th> <th>% IQOS:Cigarettes</th> </tr> </thead> <tbody> <tr> <td>Day 1</td> <td>14.9 (6.1)</td> <td>14.5 (3.6)</td> <td>102.8%</td> </tr> <tr> <td>Day 5</td> <td>20.7 (8.1)</td> <td>16.6 (3.8)</td> <td>124.7%</td> </tr> </tbody> </table>                                                                                                                                                                                                                                                                                                                                                                                                                                                                                                                                                                                                                                                                                                                                                                                                                                                                                                                                                                                                                                                                                                                                                                                                                                                                                                                                                                                                                                                                                                                                                                                                                                                                                                                                                                                                                                                                                                                                                                                                                                                                                                                                                                                                                                                                                                                                                                                                                                                                                                                                                                                                                                                                                              | Time                                            | Mean (SD) IQOS tobacco sticks                                 | Mean (SD) cigarettes    | % IQOS:Cigarettes | Day 1         | 14.9 (6.1)       | 14.5 (3.6) | 102.8%              | Day 5             | 20.7 (8.1)        | 16.6 (3.8)        | 124.7%                 |                          |                         |                         |                             |                            |                         |                         |                       |                            |                         |                         |                                                         |                        |                      |                      |                      |                         |                      |                      |                                        |                   |                   |                   |                               |                      |                   |                  |                                  |                       |                   |                   |                                  |                      |                   |                   |                           |                         |                      |                      |                             |                       |                     |                      |                              |                            |                           |                            |                              |                         |                      |                      |                              |                         |                      |                      |                                   |                    |                   |                     |                  |                      |                   |                      |                  |                         |                   |                         |
| Time                              | Mean (SD) IQOS tobacco sticks                                                                                                                                                                                                                                                                                                                                                                                                                                                                                                                                                                                                                                                                                                                                                                                                                                                                                                                                                                                                                                                                                                                                                                                                                                                                                                                                                                                                                                                                                                                                                                                                                                                                                                                                                                                                                                                                                                                                                                                                                                                                                                                                                                                                                                                                                                                                                                                                                                                                                                                                                                                                                                                                                                                                                                                                                                                                                                                                                                                                                                                                                        | Mean (SD) cigarettes                            | % IQOS:Cigarettes                                             |                         |                   |               |                  |            |                     |                   |                   |                   |                        |                          |                         |                         |                             |                            |                         |                         |                       |                            |                         |                         |                                                         |                        |                      |                      |                      |                         |                      |                      |                                        |                   |                   |                   |                               |                      |                   |                  |                                  |                       |                   |                   |                                  |                      |                   |                   |                           |                         |                      |                      |                             |                       |                     |                      |                              |                            |                           |                            |                              |                         |                      |                      |                              |                         |                      |                      |                                   |                    |                   |                     |                  |                      |                   |                      |                  |                         |                   |                         |
| Day 1                             | 14.9 (6.1)                                                                                                                                                                                                                                                                                                                                                                                                                                                                                                                                                                                                                                                                                                                                                                                                                                                                                                                                                                                                                                                                                                                                                                                                                                                                                                                                                                                                                                                                                                                                                                                                                                                                                                                                                                                                                                                                                                                                                                                                                                                                                                                                                                                                                                                                                                                                                                                                                                                                                                                                                                                                                                                                                                                                                                                                                                                                                                                                                                                                                                                                                                           | 14.5 (3.6)                                      | 102.8%                                                        |                         |                   |               |                  |            |                     |                   |                   |                   |                        |                          |                         |                         |                             |                            |                         |                         |                       |                            |                         |                         |                                                         |                        |                      |                      |                      |                         |                      |                      |                                        |                   |                   |                   |                               |                      |                   |                  |                                  |                       |                   |                   |                                  |                      |                   |                   |                           |                         |                      |                      |                             |                       |                     |                      |                              |                            |                           |                            |                              |                         |                      |                      |                              |                         |                      |                      |                                   |                    |                   |                     |                  |                      |                   |                      |                  |                         |                   |                         |
| Day 5                             | 20.7 (8.1)                                                                                                                                                                                                                                                                                                                                                                                                                                                                                                                                                                                                                                                                                                                                                                                                                                                                                                                                                                                                                                                                                                                                                                                                                                                                                                                                                                                                                                                                                                                                                                                                                                                                                                                                                                                                                                                                                                                                                                                                                                                                                                                                                                                                                                                                                                                                                                                                                                                                                                                                                                                                                                                                                                                                                                                                                                                                                                                                                                                                                                                                                                           | 16.6 (3.8)                                      | 124.7%                                                        |                         |                   |               |                  |            |                     |                   |                   |                   |                        |                          |                         |                         |                             |                            |                         |                         |                       |                            |                         |                         |                                                         |                        |                      |                      |                      |                         |                      |                      |                                        |                   |                   |                   |                               |                      |                   |                  |                                  |                       |                   |                   |                                  |                      |                   |                   |                           |                         |                      |                      |                             |                       |                     |                      |                              |                            |                           |                            |                              |                         |                      |                      |                              |                         |                      |                      |                                   |                    |                   |                     |                  |                      |                   |                      |                  |                         |                   |                         |
|                                   | <p><b>Human puffing topography</b></p> <ul style="list-style-type: none"> <li>• At day 1, in IQOS group compared with cigarette group:</li> </ul>                                                                                                                                                                                                                                                                                                                                                                                                                                                                                                                                                                                                                                                                                                                                                                                                                                                                                                                                                                                                                                                                                                                                                                                                                                                                                                                                                                                                                                                                                                                                                                                                                                                                                                                                                                                                                                                                                                                                                                                                                                                                                                                                                                                                                                                                                                                                                                                                                                                                                                                                                                                                                                                                                                                                                                                                                                                                                                                                                                    |                                                 |                                                               |                         |                   |               |                  |            |                     |                   |                   |                   |                        |                          |                         |                         |                             |                            |                         |                         |                       |                            |                         |                         |                                                         |                        |                      |                      |                      |                         |                      |                      |                                        |                   |                   |                   |                               |                      |                   |                  |                                  |                       |                   |                   |                                  |                      |                   |                   |                           |                         |                      |                      |                             |                       |                     |                      |                              |                            |                           |                            |                              |                         |                      |                      |                              |                         |                      |                      |                                   |                    |                   |                     |                  |                      |                   |                      |                  |                         |                   |                         |



|                            |                                                                                                                                                                                                                                                                                                                                                                                                                                                                                                                                                                                                                                                                                                                                                                                                                                                                                                                                                           |
|----------------------------|-----------------------------------------------------------------------------------------------------------------------------------------------------------------------------------------------------------------------------------------------------------------------------------------------------------------------------------------------------------------------------------------------------------------------------------------------------------------------------------------------------------------------------------------------------------------------------------------------------------------------------------------------------------------------------------------------------------------------------------------------------------------------------------------------------------------------------------------------------------------------------------------------------------------------------------------------------------|
|                            | <ul style="list-style-type: none"> <li>○ Average puff duration 26% longer</li> <li>○ Puff frequency 31% higher</li> <li>● At day 4, in IQOS group compared with cigarette group: <ul style="list-style-type: none"> <li>○ Average puff duration 32% longer</li> <li>○ Puff frequency 32% higher</li> </ul> </li> </ul> <p><b>Differences in modified cigarette evaluation subscales' scores (IQOS - cigarette):</b></p> <ul style="list-style-type: none"> <li>● Smoking satisfaction: <b>-1.26 (-1.68, -0.85)</b></li> <li>● Aversion: <b>0.25 (0.04, 0.46)</b></li> <li>● Craving reduction: <b>-1.12 (-1.58, -0.66)</b></li> <li>● Enjoyment of respiratory tract sensation: <b>-1.0 (-1.36, -0.64)</b></li> <li>● Psychological reward: <b>-0.72 (-1.06, -0.39)</b></li> </ul> <ul style="list-style-type: none"> <li>● Difference in urges to smoke scores between IQOS and cigarette groups' all time points': <b>-0.3 (-0.75, 0.12)</b></li> </ul> |
| <b>Findings overview</b>   | <ul style="list-style-type: none"> <li>● IQOS provide the same amount of nicotine and suppress urges to smoke similarly to cigarettes</li> <li>● Switching for five days from cigarette smoking to using IQOS reduces exposure to HPHC</li> <li>● Smokers that switched to IQOS used more tobacco sticks than smokers who continued smoking cigarettes, IQOS users show prolonged puff duration and higher puffing frequency</li> <li>● Participants scored IQOS significantly lower on four out of five subjective experience subscales than cigarettes: IQOS was significantly less satisfying, less reducing cravings, less enjoyable in relation to respiratory tract sensation, and less psychologically rewarding than cigarettes</li> </ul>                                                                                                                                                                                                        |
| <b>Authors, study year</b> | <b>Ludicke et al., 2016 [6]</b>                                                                                                                                                                                                                                                                                                                                                                                                                                                                                                                                                                                                                                                                                                                                                                                                                                                                                                                           |
| <b>Funder/Affiliations</b> | <b>Affiliation:</b> Department of Research and Development, Philip Morris Products S.A., Neuchâtel, Switzerland                                                                                                                                                                                                                                                                                                                                                                                                                                                                                                                                                                                                                                                                                                                                                                                                                                           |
| <b>Primary aim</b>         | To compare exposure to HPHC during 5 days of use                                                                                                                                                                                                                                                                                                                                                                                                                                                                                                                                                                                                                                                                                                                                                                                                                                                                                                          |
| <b>Products used</b>       | <ul style="list-style-type: none"> <li>● Carbon heated tobacco product (CHTP)</li> <li>● Participants' own preferred brand of non-menthol cigarettes</li> </ul>                                                                                                                                                                                                                                                                                                                                                                                                                                                                                                                                                                                                                                                                                                                                                                                           |
| <b>Methods</b>             | <p><b>Design:</b> Randomised controlled trial</p> <p><b>Recruitment:</b> not described</p> <p><b>Study date and Setting:</b> November 2008 – February 2009; MTZ Clinical Research Ltd, Warsaw, Poland</p> <p><b>Protocol registered:</b> 19 December, 2008 (NCT00812279 at clinicaltrials.gov)</p> <p><b>Inclusion criteria:</b> healthy Caucasian smokers; body mass index between 18.5–27.5 kg/m<sup>2</sup>; 23–55 years old; 10–30 CPD (tar yield of ≤10 mg/cig); smoking for at least 5 consecutive years</p> <p><b>Exclusion criteria:</b> pregnant or breast feeding females and females not using effective contraception</p>                                                                                                                                                                                                                                                                                                                     |
| <b>Participants</b>        | 130 screened; 18/130 (14%) did not meet eligibility criteria<br>N=112; 50% male; mean age 36.3; mean FTND=5.6                                                                                                                                                                                                                                                                                                                                                                                                                                                                                                                                                                                                                                                                                                                                                                                                                                             |

|                                                     | No one dropped out                                                                                                                                                                                                                                                                                                                                                                                                                                                                                                                                                                                                                                                                                                                                                                                                                                                                                                                                                                                                                                                                                                                                                                                                                                                                                                                                                                                                                                                                                                                                                                                                                                                                                                                                                                                                                                                                                                                                                                                                                                                                                                                                                                                                                                                                                                                                                                                                                                                                                                                                                                                                                                            |                                                 |                                                               |  |  |               |                  |            |                     |           |           |           |                    |           |           |           |                          |           |           |           |                       |           |           |           |                                                     |               |              |               |                  |               |              |               |                            |             |           |           |                              |             |            |           |                       |              |              |               |                              |            |           |            |                    |              |           |               |      |                |                      |                   |       |            |            |        |       |            |            |        |
|-----------------------------------------------------|---------------------------------------------------------------------------------------------------------------------------------------------------------------------------------------------------------------------------------------------------------------------------------------------------------------------------------------------------------------------------------------------------------------------------------------------------------------------------------------------------------------------------------------------------------------------------------------------------------------------------------------------------------------------------------------------------------------------------------------------------------------------------------------------------------------------------------------------------------------------------------------------------------------------------------------------------------------------------------------------------------------------------------------------------------------------------------------------------------------------------------------------------------------------------------------------------------------------------------------------------------------------------------------------------------------------------------------------------------------------------------------------------------------------------------------------------------------------------------------------------------------------------------------------------------------------------------------------------------------------------------------------------------------------------------------------------------------------------------------------------------------------------------------------------------------------------------------------------------------------------------------------------------------------------------------------------------------------------------------------------------------------------------------------------------------------------------------------------------------------------------------------------------------------------------------------------------------------------------------------------------------------------------------------------------------------------------------------------------------------------------------------------------------------------------------------------------------------------------------------------------------------------------------------------------------------------------------------------------------------------------------------------------------|-------------------------------------------------|---------------------------------------------------------------|--|--|---------------|------------------|------------|---------------------|-----------|-----------|-----------|--------------------|-----------|-----------|-----------|--------------------------|-----------|-----------|-----------|-----------------------|-----------|-----------|-----------|-----------------------------------------------------|---------------|--------------|---------------|------------------|---------------|--------------|---------------|----------------------------|-------------|-----------|-----------|------------------------------|-------------|------------|-----------|-----------------------|--------------|--------------|---------------|------------------------------|------------|-----------|------------|--------------------|--------------|-----------|---------------|------|----------------|----------------------|-------------------|-------|------------|------------|--------|-------|------------|------------|--------|
| <b>Interventions/Exposure</b>                       | <p>Randomised 2:1:1 to CHTP (n=56), cigarette (n=28), and abstinence (n=28) conditions for 5 days in confinement</p> <ul style="list-style-type: none"> <li>• CHTP group participants were asked to <i>ad libitum</i> use exclusively carbon heated tobacco product</li> <li>• Cigarette group participants were asked to <i>ad libitum</i> use exclusively their own brand of cigarettes</li> <li>• Abstinence group participants were asked to completely abstain from smoking for five days. The use of nicotine replacement therapy was not allowed but they underwent counselling on smoking cessation</li> </ul>                                                                                                                                                                                                                                                                                                                                                                                                                                                                                                                                                                                                                                                                                                                                                                                                                                                                                                                                                                                                                                                                                                                                                                                                                                                                                                                                                                                                                                                                                                                                                                                                                                                                                                                                                                                                                                                                                                                                                                                                                                        |                                                 |                                                               |  |  |               |                  |            |                     |           |           |           |                    |           |           |           |                          |           |           |           |                       |           |           |           |                                                     |               |              |               |                  |               |              |               |                            |             |           |           |                              |             |            |           |                       |              |              |               |                              |            |           |            |                    |              |           |               |      |                |                      |                   |       |            |            |        |       |            |            |        |
| <b>Outcome/Key findings</b>                         | <p><b>Levels of biomarkers of exposure to HPHC at day 5 in smoking, abstinence ad CHTP groups</b></p> <table border="1"> <thead> <tr> <th rowspan="2">Parent harmful and potentially harmful compound</th> <th colspan="3">Geometric mean (95% CI) of exposure levels to HPHC biomarkers</th> </tr> <tr> <th>Smoking group</th> <th>Abstinence group</th> <th>CHTP group</th> </tr> </thead> <tbody> <tr> <td>Carbon monoxide (%)</td> <td>5.9 (1.3)</td> <td>1.1 (0.1)</td> <td>2.3 (0.6)</td> </tr> <tr> <td>Acrolein (mg/24 h)</td> <td>1.9 (0.8)</td> <td>0.3 (0.1)</td> <td>0.5 (0.2)</td> </tr> <tr> <td>1,3-butadiene (µg/24 h))</td> <td>7.9 (4.4)</td> <td>0.8 (0.3)</td> <td>0.8 (0.3)</td> </tr> <tr> <td>Benzene (pg/mg creat)</td> <td>6.4 (3.1)</td> <td>0.8 (0.3)</td> <td>1.0 (0.4)</td> </tr> <tr> <td>Nicotine-derived nitrosamine ketone (NNK) (ng/24 h)</td> <td>279.0 (148.0)</td> <td>124.5 (94.1)</td> <td>145.3 (166.1)</td> </tr> <tr> <td>Pyrene (ng/24 h)</td> <td>434.8 (162.1)</td> <td>237.3 (85.8)</td> <td>247.5 (113.0)</td> </tr> <tr> <td>4-Aminobiphenyl (ng/ 24 h)</td> <td>21.4 (11.5)</td> <td>3.7 (2.8)</td> <td>3.4 (1.6)</td> </tr> <tr> <td>2-aminonaphthalene (ng/24 h)</td> <td>34.0 (16.3)</td> <td>11. (19.5)</td> <td>6.4 (8.9)</td> </tr> <tr> <td>o-toluidine (ng/24 h)</td> <td>232.1 (77.6)</td> <td>110.3 (51.1)</td> <td>114.0 (144.9)</td> </tr> <tr> <td>Nicotine equivalents (ng/ml)</td> <td>17.2 (5.0)</td> <td>0.6 (0.3)</td> <td>19.1 (7.5)</td> </tr> <tr> <td>Cotinine (mg/24 h)</td> <td>289.8 (76.4)</td> <td>9.4 (5.3)</td> <td>319.8 (109.7)</td> </tr> </tbody> </table> <p>Note. creat: creatinine</p> <p><b>Daily use of CHTP vs cigarettes</b></p> <table border="1"> <thead> <tr> <th>Time</th> <th>Mean (SD) CHTP</th> <th>Mean (SD) cigarettes</th> <th>% CHTP:Cigarettes</th> </tr> </thead> <tbody> <tr> <td>Day 1</td> <td>17.8 (3.2)</td> <td>17.4 (3.4)</td> <td>102.3%</td> </tr> <tr> <td>Day 5</td> <td>19.7 (7.8)</td> <td>18.8 (4.4)</td> <td>104.8%</td> </tr> </tbody> </table> <p><b>Human puffing topography</b></p> <ul style="list-style-type: none"> <li>• At day 1, CHTP % changes compared with baseline (measured while using own brand of cigarettes): <ul style="list-style-type: none"> <li>○ 20% longer puff duration</li> <li>○ 45% higher average puff volume</li> <li>○ 59% more frequent puffs</li> <li>○ 125% higher total puff volume</li> </ul> </li> <li>• At day 5, CHTP % changes compared with baseline (measured while using own brand of cigarettes): <ul style="list-style-type: none"> <li>○ 23% longer puff duration</li> </ul> </li> </ul> | Parent harmful and potentially harmful compound | Geometric mean (95% CI) of exposure levels to HPHC biomarkers |  |  | Smoking group | Abstinence group | CHTP group | Carbon monoxide (%) | 5.9 (1.3) | 1.1 (0.1) | 2.3 (0.6) | Acrolein (mg/24 h) | 1.9 (0.8) | 0.3 (0.1) | 0.5 (0.2) | 1,3-butadiene (µg/24 h)) | 7.9 (4.4) | 0.8 (0.3) | 0.8 (0.3) | Benzene (pg/mg creat) | 6.4 (3.1) | 0.8 (0.3) | 1.0 (0.4) | Nicotine-derived nitrosamine ketone (NNK) (ng/24 h) | 279.0 (148.0) | 124.5 (94.1) | 145.3 (166.1) | Pyrene (ng/24 h) | 434.8 (162.1) | 237.3 (85.8) | 247.5 (113.0) | 4-Aminobiphenyl (ng/ 24 h) | 21.4 (11.5) | 3.7 (2.8) | 3.4 (1.6) | 2-aminonaphthalene (ng/24 h) | 34.0 (16.3) | 11. (19.5) | 6.4 (8.9) | o-toluidine (ng/24 h) | 232.1 (77.6) | 110.3 (51.1) | 114.0 (144.9) | Nicotine equivalents (ng/ml) | 17.2 (5.0) | 0.6 (0.3) | 19.1 (7.5) | Cotinine (mg/24 h) | 289.8 (76.4) | 9.4 (5.3) | 319.8 (109.7) | Time | Mean (SD) CHTP | Mean (SD) cigarettes | % CHTP:Cigarettes | Day 1 | 17.8 (3.2) | 17.4 (3.4) | 102.3% | Day 5 | 19.7 (7.8) | 18.8 (4.4) | 104.8% |
| Parent harmful and potentially harmful compound     | Geometric mean (95% CI) of exposure levels to HPHC biomarkers                                                                                                                                                                                                                                                                                                                                                                                                                                                                                                                                                                                                                                                                                                                                                                                                                                                                                                                                                                                                                                                                                                                                                                                                                                                                                                                                                                                                                                                                                                                                                                                                                                                                                                                                                                                                                                                                                                                                                                                                                                                                                                                                                                                                                                                                                                                                                                                                                                                                                                                                                                                                 |                                                 |                                                               |  |  |               |                  |            |                     |           |           |           |                    |           |           |           |                          |           |           |           |                       |           |           |           |                                                     |               |              |               |                  |               |              |               |                            |             |           |           |                              |             |            |           |                       |              |              |               |                              |            |           |            |                    |              |           |               |      |                |                      |                   |       |            |            |        |       |            |            |        |
|                                                     | Smoking group                                                                                                                                                                                                                                                                                                                                                                                                                                                                                                                                                                                                                                                                                                                                                                                                                                                                                                                                                                                                                                                                                                                                                                                                                                                                                                                                                                                                                                                                                                                                                                                                                                                                                                                                                                                                                                                                                                                                                                                                                                                                                                                                                                                                                                                                                                                                                                                                                                                                                                                                                                                                                                                 | Abstinence group                                | CHTP group                                                    |  |  |               |                  |            |                     |           |           |           |                    |           |           |           |                          |           |           |           |                       |           |           |           |                                                     |               |              |               |                  |               |              |               |                            |             |           |           |                              |             |            |           |                       |              |              |               |                              |            |           |            |                    |              |           |               |      |                |                      |                   |       |            |            |        |       |            |            |        |
| Carbon monoxide (%)                                 | 5.9 (1.3)                                                                                                                                                                                                                                                                                                                                                                                                                                                                                                                                                                                                                                                                                                                                                                                                                                                                                                                                                                                                                                                                                                                                                                                                                                                                                                                                                                                                                                                                                                                                                                                                                                                                                                                                                                                                                                                                                                                                                                                                                                                                                                                                                                                                                                                                                                                                                                                                                                                                                                                                                                                                                                                     | 1.1 (0.1)                                       | 2.3 (0.6)                                                     |  |  |               |                  |            |                     |           |           |           |                    |           |           |           |                          |           |           |           |                       |           |           |           |                                                     |               |              |               |                  |               |              |               |                            |             |           |           |                              |             |            |           |                       |              |              |               |                              |            |           |            |                    |              |           |               |      |                |                      |                   |       |            |            |        |       |            |            |        |
| Acrolein (mg/24 h)                                  | 1.9 (0.8)                                                                                                                                                                                                                                                                                                                                                                                                                                                                                                                                                                                                                                                                                                                                                                                                                                                                                                                                                                                                                                                                                                                                                                                                                                                                                                                                                                                                                                                                                                                                                                                                                                                                                                                                                                                                                                                                                                                                                                                                                                                                                                                                                                                                                                                                                                                                                                                                                                                                                                                                                                                                                                                     | 0.3 (0.1)                                       | 0.5 (0.2)                                                     |  |  |               |                  |            |                     |           |           |           |                    |           |           |           |                          |           |           |           |                       |           |           |           |                                                     |               |              |               |                  |               |              |               |                            |             |           |           |                              |             |            |           |                       |              |              |               |                              |            |           |            |                    |              |           |               |      |                |                      |                   |       |            |            |        |       |            |            |        |
| 1,3-butadiene (µg/24 h))                            | 7.9 (4.4)                                                                                                                                                                                                                                                                                                                                                                                                                                                                                                                                                                                                                                                                                                                                                                                                                                                                                                                                                                                                                                                                                                                                                                                                                                                                                                                                                                                                                                                                                                                                                                                                                                                                                                                                                                                                                                                                                                                                                                                                                                                                                                                                                                                                                                                                                                                                                                                                                                                                                                                                                                                                                                                     | 0.8 (0.3)                                       | 0.8 (0.3)                                                     |  |  |               |                  |            |                     |           |           |           |                    |           |           |           |                          |           |           |           |                       |           |           |           |                                                     |               |              |               |                  |               |              |               |                            |             |           |           |                              |             |            |           |                       |              |              |               |                              |            |           |            |                    |              |           |               |      |                |                      |                   |       |            |            |        |       |            |            |        |
| Benzene (pg/mg creat)                               | 6.4 (3.1)                                                                                                                                                                                                                                                                                                                                                                                                                                                                                                                                                                                                                                                                                                                                                                                                                                                                                                                                                                                                                                                                                                                                                                                                                                                                                                                                                                                                                                                                                                                                                                                                                                                                                                                                                                                                                                                                                                                                                                                                                                                                                                                                                                                                                                                                                                                                                                                                                                                                                                                                                                                                                                                     | 0.8 (0.3)                                       | 1.0 (0.4)                                                     |  |  |               |                  |            |                     |           |           |           |                    |           |           |           |                          |           |           |           |                       |           |           |           |                                                     |               |              |               |                  |               |              |               |                            |             |           |           |                              |             |            |           |                       |              |              |               |                              |            |           |            |                    |              |           |               |      |                |                      |                   |       |            |            |        |       |            |            |        |
| Nicotine-derived nitrosamine ketone (NNK) (ng/24 h) | 279.0 (148.0)                                                                                                                                                                                                                                                                                                                                                                                                                                                                                                                                                                                                                                                                                                                                                                                                                                                                                                                                                                                                                                                                                                                                                                                                                                                                                                                                                                                                                                                                                                                                                                                                                                                                                                                                                                                                                                                                                                                                                                                                                                                                                                                                                                                                                                                                                                                                                                                                                                                                                                                                                                                                                                                 | 124.5 (94.1)                                    | 145.3 (166.1)                                                 |  |  |               |                  |            |                     |           |           |           |                    |           |           |           |                          |           |           |           |                       |           |           |           |                                                     |               |              |               |                  |               |              |               |                            |             |           |           |                              |             |            |           |                       |              |              |               |                              |            |           |            |                    |              |           |               |      |                |                      |                   |       |            |            |        |       |            |            |        |
| Pyrene (ng/24 h)                                    | 434.8 (162.1)                                                                                                                                                                                                                                                                                                                                                                                                                                                                                                                                                                                                                                                                                                                                                                                                                                                                                                                                                                                                                                                                                                                                                                                                                                                                                                                                                                                                                                                                                                                                                                                                                                                                                                                                                                                                                                                                                                                                                                                                                                                                                                                                                                                                                                                                                                                                                                                                                                                                                                                                                                                                                                                 | 237.3 (85.8)                                    | 247.5 (113.0)                                                 |  |  |               |                  |            |                     |           |           |           |                    |           |           |           |                          |           |           |           |                       |           |           |           |                                                     |               |              |               |                  |               |              |               |                            |             |           |           |                              |             |            |           |                       |              |              |               |                              |            |           |            |                    |              |           |               |      |                |                      |                   |       |            |            |        |       |            |            |        |
| 4-Aminobiphenyl (ng/ 24 h)                          | 21.4 (11.5)                                                                                                                                                                                                                                                                                                                                                                                                                                                                                                                                                                                                                                                                                                                                                                                                                                                                                                                                                                                                                                                                                                                                                                                                                                                                                                                                                                                                                                                                                                                                                                                                                                                                                                                                                                                                                                                                                                                                                                                                                                                                                                                                                                                                                                                                                                                                                                                                                                                                                                                                                                                                                                                   | 3.7 (2.8)                                       | 3.4 (1.6)                                                     |  |  |               |                  |            |                     |           |           |           |                    |           |           |           |                          |           |           |           |                       |           |           |           |                                                     |               |              |               |                  |               |              |               |                            |             |           |           |                              |             |            |           |                       |              |              |               |                              |            |           |            |                    |              |           |               |      |                |                      |                   |       |            |            |        |       |            |            |        |
| 2-aminonaphthalene (ng/24 h)                        | 34.0 (16.3)                                                                                                                                                                                                                                                                                                                                                                                                                                                                                                                                                                                                                                                                                                                                                                                                                                                                                                                                                                                                                                                                                                                                                                                                                                                                                                                                                                                                                                                                                                                                                                                                                                                                                                                                                                                                                                                                                                                                                                                                                                                                                                                                                                                                                                                                                                                                                                                                                                                                                                                                                                                                                                                   | 11. (19.5)                                      | 6.4 (8.9)                                                     |  |  |               |                  |            |                     |           |           |           |                    |           |           |           |                          |           |           |           |                       |           |           |           |                                                     |               |              |               |                  |               |              |               |                            |             |           |           |                              |             |            |           |                       |              |              |               |                              |            |           |            |                    |              |           |               |      |                |                      |                   |       |            |            |        |       |            |            |        |
| o-toluidine (ng/24 h)                               | 232.1 (77.6)                                                                                                                                                                                                                                                                                                                                                                                                                                                                                                                                                                                                                                                                                                                                                                                                                                                                                                                                                                                                                                                                                                                                                                                                                                                                                                                                                                                                                                                                                                                                                                                                                                                                                                                                                                                                                                                                                                                                                                                                                                                                                                                                                                                                                                                                                                                                                                                                                                                                                                                                                                                                                                                  | 110.3 (51.1)                                    | 114.0 (144.9)                                                 |  |  |               |                  |            |                     |           |           |           |                    |           |           |           |                          |           |           |           |                       |           |           |           |                                                     |               |              |               |                  |               |              |               |                            |             |           |           |                              |             |            |           |                       |              |              |               |                              |            |           |            |                    |              |           |               |      |                |                      |                   |       |            |            |        |       |            |            |        |
| Nicotine equivalents (ng/ml)                        | 17.2 (5.0)                                                                                                                                                                                                                                                                                                                                                                                                                                                                                                                                                                                                                                                                                                                                                                                                                                                                                                                                                                                                                                                                                                                                                                                                                                                                                                                                                                                                                                                                                                                                                                                                                                                                                                                                                                                                                                                                                                                                                                                                                                                                                                                                                                                                                                                                                                                                                                                                                                                                                                                                                                                                                                                    | 0.6 (0.3)                                       | 19.1 (7.5)                                                    |  |  |               |                  |            |                     |           |           |           |                    |           |           |           |                          |           |           |           |                       |           |           |           |                                                     |               |              |               |                  |               |              |               |                            |             |           |           |                              |             |            |           |                       |              |              |               |                              |            |           |            |                    |              |           |               |      |                |                      |                   |       |            |            |        |       |            |            |        |
| Cotinine (mg/24 h)                                  | 289.8 (76.4)                                                                                                                                                                                                                                                                                                                                                                                                                                                                                                                                                                                                                                                                                                                                                                                                                                                                                                                                                                                                                                                                                                                                                                                                                                                                                                                                                                                                                                                                                                                                                                                                                                                                                                                                                                                                                                                                                                                                                                                                                                                                                                                                                                                                                                                                                                                                                                                                                                                                                                                                                                                                                                                  | 9.4 (5.3)                                       | 319.8 (109.7)                                                 |  |  |               |                  |            |                     |           |           |           |                    |           |           |           |                          |           |           |           |                       |           |           |           |                                                     |               |              |               |                  |               |              |               |                            |             |           |           |                              |             |            |           |                       |              |              |               |                              |            |           |            |                    |              |           |               |      |                |                      |                   |       |            |            |        |       |            |            |        |
| Time                                                | Mean (SD) CHTP                                                                                                                                                                                                                                                                                                                                                                                                                                                                                                                                                                                                                                                                                                                                                                                                                                                                                                                                                                                                                                                                                                                                                                                                                                                                                                                                                                                                                                                                                                                                                                                                                                                                                                                                                                                                                                                                                                                                                                                                                                                                                                                                                                                                                                                                                                                                                                                                                                                                                                                                                                                                                                                | Mean (SD) cigarettes                            | % CHTP:Cigarettes                                             |  |  |               |                  |            |                     |           |           |           |                    |           |           |           |                          |           |           |           |                       |           |           |           |                                                     |               |              |               |                  |               |              |               |                            |             |           |           |                              |             |            |           |                       |              |              |               |                              |            |           |            |                    |              |           |               |      |                |                      |                   |       |            |            |        |       |            |            |        |
| Day 1                                               | 17.8 (3.2)                                                                                                                                                                                                                                                                                                                                                                                                                                                                                                                                                                                                                                                                                                                                                                                                                                                                                                                                                                                                                                                                                                                                                                                                                                                                                                                                                                                                                                                                                                                                                                                                                                                                                                                                                                                                                                                                                                                                                                                                                                                                                                                                                                                                                                                                                                                                                                                                                                                                                                                                                                                                                                                    | 17.4 (3.4)                                      | 102.3%                                                        |  |  |               |                  |            |                     |           |           |           |                    |           |           |           |                          |           |           |           |                       |           |           |           |                                                     |               |              |               |                  |               |              |               |                            |             |           |           |                              |             |            |           |                       |              |              |               |                              |            |           |            |                    |              |           |               |      |                |                      |                   |       |            |            |        |       |            |            |        |
| Day 5                                               | 19.7 (7.8)                                                                                                                                                                                                                                                                                                                                                                                                                                                                                                                                                                                                                                                                                                                                                                                                                                                                                                                                                                                                                                                                                                                                                                                                                                                                                                                                                                                                                                                                                                                                                                                                                                                                                                                                                                                                                                                                                                                                                                                                                                                                                                                                                                                                                                                                                                                                                                                                                                                                                                                                                                                                                                                    | 18.8 (4.4)                                      | 104.8%                                                        |  |  |               |                  |            |                     |           |           |           |                    |           |           |           |                          |           |           |           |                       |           |           |           |                                                     |               |              |               |                  |               |              |               |                            |             |           |           |                              |             |            |           |                       |              |              |               |                              |            |           |            |                    |              |           |               |      |                |                      |                   |       |            |            |        |       |            |            |        |

|                                                        | <ul style="list-style-type: none"> <li>○ 51% higher average puff volume</li> <li>○ 70% more frequent puffs</li> <li>○ 148% higher total puff volume</li> </ul>                                                                                                                                                                                                                                                                                                                                                                                                                                                                                                                                                                                                                                                                                                                                                                                                                                                                                                                                                                                                            |                                                 |                                                               |  |               |               |                     |                   |                   |                       |                            |                         |                            |                    |                    |                      |                   |                  |                                                        |                        |                     |                     |                         |                      |                                       |                   |                    |
|--------------------------------------------------------|---------------------------------------------------------------------------------------------------------------------------------------------------------------------------------------------------------------------------------------------------------------------------------------------------------------------------------------------------------------------------------------------------------------------------------------------------------------------------------------------------------------------------------------------------------------------------------------------------------------------------------------------------------------------------------------------------------------------------------------------------------------------------------------------------------------------------------------------------------------------------------------------------------------------------------------------------------------------------------------------------------------------------------------------------------------------------------------------------------------------------------------------------------------------------|-------------------------------------------------|---------------------------------------------------------------|--|---------------|---------------|---------------------|-------------------|-------------------|-----------------------|----------------------------|-------------------------|----------------------------|--------------------|--------------------|----------------------|-------------------|------------------|--------------------------------------------------------|------------------------|---------------------|---------------------|-------------------------|----------------------|---------------------------------------|-------------------|--------------------|
| <b>Findings overview</b>                               | <ul style="list-style-type: none"> <li>● Switching for five days from cigarette smoking to using carbon heated tobacco product use reduces exposure to HPHC</li> <li>● Smokers who switched to using CHTP employed compensatory puffing behaviour and used slightly more of the product than had used cigarettes at baseline</li> <li>● Yielded nicotine levels were comparable between CHTP and cigarette groups</li> </ul>                                                                                                                                                                                                                                                                                                                                                                                                                                                                                                                                                                                                                                                                                                                                              |                                                 |                                                               |  |               |               |                     |                   |                   |                       |                            |                         |                            |                    |                    |                      |                   |                  |                                                        |                        |                     |                     |                         |                      |                                       |                   |                    |
| <b>Authors, study year</b>                             | <b>Ludicke et al., 2017 [5]</b>                                                                                                                                                                                                                                                                                                                                                                                                                                                                                                                                                                                                                                                                                                                                                                                                                                                                                                                                                                                                                                                                                                                                           |                                                 |                                                               |  |               |               |                     |                   |                   |                       |                            |                         |                            |                    |                    |                      |                   |                  |                                                        |                        |                     |                     |                         |                      |                                       |                   |                    |
| <b>Funder/Affiliations</b>                             | <b>Affiliations:</b> Philip Morris Products S.A., Research & Development, Neuchâtel, Switzerland                                                                                                                                                                                                                                                                                                                                                                                                                                                                                                                                                                                                                                                                                                                                                                                                                                                                                                                                                                                                                                                                          |                                                 |                                                               |  |               |               |                     |                   |                   |                       |                            |                         |                            |                    |                    |                      |                   |                  |                                                        |                        |                     |                     |                         |                      |                                       |                   |                    |
| <b>Primary aim</b>                                     | To compare exposure to HPHC during 5 days of use                                                                                                                                                                                                                                                                                                                                                                                                                                                                                                                                                                                                                                                                                                                                                                                                                                                                                                                                                                                                                                                                                                                          |                                                 |                                                               |  |               |               |                     |                   |                   |                       |                            |                         |                            |                    |                    |                      |                   |                  |                                                        |                        |                     |                     |                         |                      |                                       |                   |                    |
| <b>Products used</b>                                   | <ul style="list-style-type: none"> <li>● Tobacco heating system 2.1 (THS 2.1)</li> <li>● Participants' preferred brand of non-menthol cigarettes</li> </ul>                                                                                                                                                                                                                                                                                                                                                                                                                                                                                                                                                                                                                                                                                                                                                                                                                                                                                                                                                                                                               |                                                 |                                                               |  |               |               |                     |                   |                   |                       |                            |                         |                            |                    |                    |                      |                   |                  |                                                        |                        |                     |                     |                         |                      |                                       |                   |                    |
| <b>Methods</b>                                         | <p><b>Design:</b> Randomised controlled trial</p> <p><b>Recruitment:</b> via the clinical site's database and through advertisements</p> <p><b>Study date and Setting:</b> June–July 2012; Poland</p> <p><b>Protocol registered:</b> 15 January, 2013 (NCT01780714 at <a href="http://clinicaltrials.gov">clinicaltrials.gov</a>)</p> <p><b>Inclusion criteria:</b> 23–65 years old; smokers of ≥10 CPD (nicotine ≤1 mg/cig) for 4 weeks prior start of the study</p> <p><b>Exclusion criteria:</b> smoking menthol cigarettes</p>                                                                                                                                                                                                                                                                                                                                                                                                                                                                                                                                                                                                                                        |                                                 |                                                               |  |               |               |                     |                   |                   |                       |                            |                         |                            |                    |                    |                      |                   |                  |                                                        |                        |                     |                     |                         |                      |                                       |                   |                    |
| <b>Participants</b>                                    | 42 screened; 2/42 (5%) were not randomised and were treated as back-up participants<br>N=40; 53% female; mean age 37,7; mean FTND=6.3<br>No one dropped out                                                                                                                                                                                                                                                                                                                                                                                                                                                                                                                                                                                                                                                                                                                                                                                                                                                                                                                                                                                                               |                                                 |                                                               |  |               |               |                     |                   |                   |                       |                            |                         |                            |                    |                    |                      |                   |                  |                                                        |                        |                     |                     |                         |                      |                                       |                   |                    |
| <b>Interventions/Exposure</b>                          | Randomised 1:1 to THS 2.1 (n=20) and cigarette (n=20) conditions for 5 days in confinement <ul style="list-style-type: none"> <li>● THS 2.1 group participants were asked to <i>ad libitum</i> use exclusively THS 2.1 tobacco product</li> <li>● Cigarette group participants were asked to <i>ad libitum</i> use exclusively own brand of cigarettes</li> </ul>                                                                                                                                                                                                                                                                                                                                                                                                                                                                                                                                                                                                                                                                                                                                                                                                         |                                                 |                                                               |  |               |               |                     |                   |                   |                       |                            |                         |                            |                    |                    |                      |                   |                  |                                                        |                        |                     |                     |                         |                      |                                       |                   |                    |
| <b>Outcome/Key findings</b>                            | <p><b>Levels of biomarkers of exposure to HPHC at day 5 in THS 2.1 and smoking groups</b></p> <table border="1"> <thead> <tr> <th rowspan="2">Parent harmful and potentially harmful compound</th> <th colspan="2">Geometric mean (95% CI) of exposure levels to HPHC biomarkers</th> </tr> <tr> <th>Smoking group</th> <th>THS 2.1 group</th> </tr> </thead> <tbody> <tr> <td>Carbon monoxide (%)</td> <td>5.86 (5.25; 6.54)</td> <td>1.37 (1.30; 1.45)</td> </tr> <tr> <td>Acrolein (µg/g creat)</td> <td>1227.45 (1023.62; 1471.86)</td> <td>327.31 (288.40; 371.46)</td> </tr> <tr> <td>1,3-butadiene (µg/g creat)</td> <td>3.233 (2.31; 4.51)</td> <td>0.352 (0.26; 0.47)</td> </tr> <tr> <td>Benzene (µg/g creat)</td> <td>4.49 (3.25; 6.21)</td> <td>0.3 (0.21; 0.42)</td> </tr> <tr> <td>Nicotine-derived nitrosamine ketone (NNK) (ng/g creat)</td> <td>186.8 (138.51; 251.91)</td> <td>55.9 (36.95; 84.56)</td> </tr> <tr> <td>Pyrene (µg/g creat)</td> <td>187.84 (155.69; 226.62)</td> <td>85.81 (73.65; 99.96)</td> </tr> <tr> <td>N-nitrosornicotine (NNN) (ng/g creat)</td> <td>6.45 (4.76; 8.73)</td> <td>0.806 (0.61; 1.06)</td> </tr> </tbody> </table> | Parent harmful and potentially harmful compound | Geometric mean (95% CI) of exposure levels to HPHC biomarkers |  | Smoking group | THS 2.1 group | Carbon monoxide (%) | 5.86 (5.25; 6.54) | 1.37 (1.30; 1.45) | Acrolein (µg/g creat) | 1227.45 (1023.62; 1471.86) | 327.31 (288.40; 371.46) | 1,3-butadiene (µg/g creat) | 3.233 (2.31; 4.51) | 0.352 (0.26; 0.47) | Benzene (µg/g creat) | 4.49 (3.25; 6.21) | 0.3 (0.21; 0.42) | Nicotine-derived nitrosamine ketone (NNK) (ng/g creat) | 186.8 (138.51; 251.91) | 55.9 (36.95; 84.56) | Pyrene (µg/g creat) | 187.84 (155.69; 226.62) | 85.81 (73.65; 99.96) | N-nitrosornicotine (NNN) (ng/g creat) | 6.45 (4.76; 8.73) | 0.806 (0.61; 1.06) |
| Parent harmful and potentially harmful compound        | Geometric mean (95% CI) of exposure levels to HPHC biomarkers                                                                                                                                                                                                                                                                                                                                                                                                                                                                                                                                                                                                                                                                                                                                                                                                                                                                                                                                                                                                                                                                                                             |                                                 |                                                               |  |               |               |                     |                   |                   |                       |                            |                         |                            |                    |                    |                      |                   |                  |                                                        |                        |                     |                     |                         |                      |                                       |                   |                    |
|                                                        | Smoking group                                                                                                                                                                                                                                                                                                                                                                                                                                                                                                                                                                                                                                                                                                                                                                                                                                                                                                                                                                                                                                                                                                                                                             | THS 2.1 group                                   |                                                               |  |               |               |                     |                   |                   |                       |                            |                         |                            |                    |                    |                      |                   |                  |                                                        |                        |                     |                     |                         |                      |                                       |                   |                    |
| Carbon monoxide (%)                                    | 5.86 (5.25; 6.54)                                                                                                                                                                                                                                                                                                                                                                                                                                                                                                                                                                                                                                                                                                                                                                                                                                                                                                                                                                                                                                                                                                                                                         | 1.37 (1.30; 1.45)                               |                                                               |  |               |               |                     |                   |                   |                       |                            |                         |                            |                    |                    |                      |                   |                  |                                                        |                        |                     |                     |                         |                      |                                       |                   |                    |
| Acrolein (µg/g creat)                                  | 1227.45 (1023.62; 1471.86)                                                                                                                                                                                                                                                                                                                                                                                                                                                                                                                                                                                                                                                                                                                                                                                                                                                                                                                                                                                                                                                                                                                                                | 327.31 (288.40; 371.46)                         |                                                               |  |               |               |                     |                   |                   |                       |                            |                         |                            |                    |                    |                      |                   |                  |                                                        |                        |                     |                     |                         |                      |                                       |                   |                    |
| 1,3-butadiene (µg/g creat)                             | 3.233 (2.31; 4.51)                                                                                                                                                                                                                                                                                                                                                                                                                                                                                                                                                                                                                                                                                                                                                                                                                                                                                                                                                                                                                                                                                                                                                        | 0.352 (0.26; 0.47)                              |                                                               |  |               |               |                     |                   |                   |                       |                            |                         |                            |                    |                    |                      |                   |                  |                                                        |                        |                     |                     |                         |                      |                                       |                   |                    |
| Benzene (µg/g creat)                                   | 4.49 (3.25; 6.21)                                                                                                                                                                                                                                                                                                                                                                                                                                                                                                                                                                                                                                                                                                                                                                                                                                                                                                                                                                                                                                                                                                                                                         | 0.3 (0.21; 0.42)                                |                                                               |  |               |               |                     |                   |                   |                       |                            |                         |                            |                    |                    |                      |                   |                  |                                                        |                        |                     |                     |                         |                      |                                       |                   |                    |
| Nicotine-derived nitrosamine ketone (NNK) (ng/g creat) | 186.8 (138.51; 251.91)                                                                                                                                                                                                                                                                                                                                                                                                                                                                                                                                                                                                                                                                                                                                                                                                                                                                                                                                                                                                                                                                                                                                                    | 55.9 (36.95; 84.56)                             |                                                               |  |               |               |                     |                   |                   |                       |                            |                         |                            |                    |                    |                      |                   |                  |                                                        |                        |                     |                     |                         |                      |                                       |                   |                    |
| Pyrene (µg/g creat)                                    | 187.84 (155.69; 226.62)                                                                                                                                                                                                                                                                                                                                                                                                                                                                                                                                                                                                                                                                                                                                                                                                                                                                                                                                                                                                                                                                                                                                                   | 85.81 (73.65; 99.96)                            |                                                               |  |               |               |                     |                   |                   |                       |                            |                         |                            |                    |                    |                      |                   |                  |                                                        |                        |                     |                     |                         |                      |                                       |                   |                    |
| N-nitrosornicotine (NNN) (ng/g creat)                  | 6.45 (4.76; 8.73)                                                                                                                                                                                                                                                                                                                                                                                                                                                                                                                                                                                                                                                                                                                                                                                                                                                                                                                                                                                                                                                                                                                                                         | 0.806 (0.61; 1.06)                              |                                                               |  |               |               |                     |                   |                   |                       |                            |                         |                            |                    |                    |                      |                   |                  |                                                        |                        |                     |                     |                         |                      |                                       |                   |                    |

|                                   |                         |                         |
|-----------------------------------|-------------------------|-------------------------|
| 4-Aminobiphenyl (ng/g creat)      | 24.67 (18.74; 32.48)    | 9.88 (8.01; 12.18)      |
| 2-aminonaphthalene (ng/g creat)   | 99.72 (81.94; 121.37)   | 10.40 (8.26; 13.09)     |
| o-toluidine (ng/g creat)          | 284.16 (247.83; 325.80) | 157.82 (129.47; 192.38) |
| Acrylonitrile (ng/g creat)        | 149.80 (121.83; 184.19) | 18.15 (13.50; 24.38)    |
| Nicotine equivalents (mg/g creat) | 13.47 (11.50; 15.77)    | 11.12 (8.96; 13.80)     |
| Nicotine (ng/ml)                  | 17.07 (14.34; 20.30)    | 14.16 (10.27; 19.51)    |
| Cotinine (ng/ml)                  | 265.52 (231.16; 304.98) | 236.15 (190.42; 292.86) |

Note. creat: creatinine

**Daily use of THS 2.1 vs cigarettes**

| Time  | Mean (SD) THS 2.1 | Mean (SD) Cigarettes | % THS 2.1:Cigarettes |
|-------|-------------------|----------------------|----------------------|
| Day 1 | 21.4 (7.4)        | 17.8 (3.0)           | 120.2%               |
| Day 5 | 27.2 (9.1)        | 20.1 (3.2)           | 135.3%               |

**Human puffing topography**

- At day 1, THS 2.1 group changes compared with cigarette group:
  - Puff duration 19% longer
  - Inter-puff interval 39% shorter
  - Puff volume 14% higher
  - Total volume 21% higher
- At day 4, THS 2.1 group changes compared with cigarette group:
  - Puff duration 35% longer
  - Inter-puff interval 39% shorter
  - Puff volume 12% higher
  - Total volume 10% higher

**Modified cigarette evaluation subscales' scores (THS 2.1 vs cigarette):**

| Subjective effects of smoking subscales  | Day1                  |                          | Day 5                 |                          |
|------------------------------------------|-----------------------|--------------------------|-----------------------|--------------------------|
|                                          | THS 2.1 Mean (95% CI) | Cigarettes Mean (95% CI) | THS 2.1 Mean (95% CI) | Cigarettes Mean (95% CI) |
| Smoking satisfaction                     | 2.7 (2–3.3)           | 4.6 (4.1–5.2)            | 3.4 (2.8–3.9)         | 4.8 (4.1–5.5)            |
| Psychological rewards                    | 2.3 (1.9–2.8)         | 3.5 (2.8–4.1)            | 2.6 (2.0–3.2)         | 3.1 (2.4–3.8)            |
| Enjoyment of respiratory tract sensation | 2.1 (1.4–2.8)         | 3.6 (2.7–4.5)            | 2.3 (1.6–3.0)         | 3.9 (3.0–4.7)            |
| Craving reduction                        | 3.1 (2.3–3.9)         | 5.0 (4.3–5.6)            | 3.3 (2.5–4.1)         | 4.7 (3.9–5.4)            |
| Aversion                                 | 1.4 (1.0–1.7)         | 1.2 (0.9–1.5)            | 1.1 (0.9–1.2)         | 1.2 (0.8–1.5)            |

|                                 | <b>Bolded</b> are the statistically significant differences between two participants' groups                                                                                                                                                                                                                                                                                                                                                                                                                                                                                                                                                                                                                                                                                                                                                                                                                                                                                                                                                                                                  |                          |                                    |                          |                                    |                                 |                   |                   |                   |
|---------------------------------|-----------------------------------------------------------------------------------------------------------------------------------------------------------------------------------------------------------------------------------------------------------------------------------------------------------------------------------------------------------------------------------------------------------------------------------------------------------------------------------------------------------------------------------------------------------------------------------------------------------------------------------------------------------------------------------------------------------------------------------------------------------------------------------------------------------------------------------------------------------------------------------------------------------------------------------------------------------------------------------------------------------------------------------------------------------------------------------------------|--------------------------|------------------------------------|--------------------------|------------------------------------|---------------------------------|-------------------|-------------------|-------------------|
| <b>Findings overview</b>        | <ul style="list-style-type: none"> <li>• THS 2.1 provides the similar amount of nicotine compared with smoking cigarettes</li> <li>• Switching for five days from cigarette smoking to using THS 2.1 reduces exposure to HPHC</li> <li>• Smokers that switched to THS 2.1 used more tobacco sticks than smokers who continued smoking cigarettes, THS 2.1 users showed prolonged puff duration, increased puffing volume and puffing frequency</li> <li>• THS 2.1 was perceived as significantly less satisfying, less reducing cravings, less enjoyable in relation to respiratory tract sensation, and less psychologically rewarding than cigarettes</li> </ul>                                                                                                                                                                                                                                                                                                                                                                                                                            |                          |                                    |                          |                                    |                                 |                   |                   |                   |
| <b>Authors, study year</b>      | <b>Picavet et al., 2016 [2]</b>                                                                                                                                                                                                                                                                                                                                                                                                                                                                                                                                                                                                                                                                                                                                                                                                                                                                                                                                                                                                                                                               |                          |                                    |                          |                                    |                                 |                   |                   |                   |
| <b>Funder/Affiliations</b>      | <b>Affiliations:</b> Department of Research and Development, Philip Morris Products S.A., Neuchâtel, Switzerland                                                                                                                                                                                                                                                                                                                                                                                                                                                                                                                                                                                                                                                                                                                                                                                                                                                                                                                                                                              |                          |                                    |                          |                                    |                                 |                   |                   |                   |
| <b>Primary aim</b>              | To compare nicotine delivery and effects on urge to smoke                                                                                                                                                                                                                                                                                                                                                                                                                                                                                                                                                                                                                                                                                                                                                                                                                                                                                                                                                                                                                                     |                          |                                    |                          |                                    |                                 |                   |                   |                   |
| <b>Products used</b>            | <ul style="list-style-type: none"> <li>• THS 2.1</li> <li>• Cigarettes</li> </ul>                                                                                                                                                                                                                                                                                                                                                                                                                                                                                                                                                                                                                                                                                                                                                                                                                                                                                                                                                                                                             |                          |                                    |                          |                                    |                                 |                   |                   |                   |
| <b>Methods</b>                  | <p><b>Design:</b> Randomised crossover experimental trial</p> <p><b>Recruitment:</b> via the clinical site's database and by advertisements</p> <p><b>Study date and setting:</b> May–June 2012; Celerion GB Ltd, Northern Ireland, United Kingdom</p> <p><b>Protocol registered:</b> 15 January, 2013 (NCT01780688 at clinicaltrials.gov)</p> <p><b>Inclusion criteria:</b> healthy Caucasian smokers; 23–65 years old; smokers of <math>\geq 10</math> non-menthol CPD (nicotine <math>\leq 1</math> mg/cig) for 4 weeks prior start of the study; cigarette smokers for <math>\geq 3</math> years before screening</p> <p><b>Exclusion criteria:</b> a body mass index of less than 18.5 or more than 30 kg/m<sup>2</sup>; a urinary cotinine level less than 200 ng/mL at screening; smoker of hand-rolled cigarettes, cigars, pipes, bidis, or other non-eligible nicotine-containing products, including electronic cigarettes; unable to abstain from smoking for up to 2 consecutive days; having clinically relevant diseases or a medical condition requiring smoking cessation</p> |                          |                                    |                          |                                    |                                 |                   |                   |                   |
| <b>Participants</b>             | Information about screened or excluded participants is not reported<br>N=28; 50% male; mean age 29.6; mean FTND=4.9<br>No dropouts                                                                                                                                                                                                                                                                                                                                                                                                                                                                                                                                                                                                                                                                                                                                                                                                                                                                                                                                                            |                          |                                    |                          |                                    |                                 |                   |                   |                   |
| <b>Interventions/Exposure</b>   | Randomised 1:1 to THS 2.1 use crossover to cigarettes (n=14) and cigarette use crossover to THS 2.1 (n=14) conditions for 7 days in confinement: <ul style="list-style-type: none"> <li>• Sequence 1: 24-hour nicotine wash-out period, a day of single THS 2.1 use, a day of <i>ad libitum</i> THS 2.1 use, 24-hour nicotine wash-out period, a day of single cigarette use, a day of <i>ad libitum</i> cigarette use</li> <li>• Sequence 2: 24-hour nicotine wash-out period, a day of single cigarette use, a day of <i>ad libitum</i> cigarette use, 24-hour nicotine wash-out period, a day of single THS 2.1 use, a day of <i>ad libitum</i> THS 2.1 use</li> </ul>                                                                                                                                                                                                                                                                                                                                                                                                                     |                          |                                    |                          |                                    |                                 |                   |                   |                   |
| <b>Outcome/Key findings</b>     | <p><b>Nicotine concentration pharmacokinetics of tobacco sticks in comparison with cigarettes</b></p> <table border="1"> <thead> <tr> <th>Single use</th> <th>THS 2.1, mean (95% CI)</th> <th>Cigarette, mean (95% CI)</th> <th>THS 2.1 : Cigarette ratio (90% CI)</th> </tr> </thead> <tbody> <tr> <td>AUC<sub>0–last</sub> (ng h/ml)</td> <td>17.7 (15.0, 20.8)</td> <td>22.8 (19.4, 26.8)</td> <td>77.4% (70.5–85.0)</td> </tr> </tbody> </table>                                                                                                                                                                                                                                                                                                                                                                                                                                                                                                                                                                                                                                          | Single use               | THS 2.1, mean (95% CI)             | Cigarette, mean (95% CI) | THS 2.1 : Cigarette ratio (90% CI) | AUC <sub>0–last</sub> (ng h/ml) | 17.7 (15.0, 20.8) | 22.8 (19.4, 26.8) | 77.4% (70.5–85.0) |
| Single use                      | THS 2.1, mean (95% CI)                                                                                                                                                                                                                                                                                                                                                                                                                                                                                                                                                                                                                                                                                                                                                                                                                                                                                                                                                                                                                                                                        | Cigarette, mean (95% CI) | THS 2.1 : Cigarette ratio (90% CI) |                          |                                    |                                 |                   |                   |                   |
| AUC <sub>0–last</sub> (ng h/ml) | 17.7 (15.0, 20.8)                                                                                                                                                                                                                                                                                                                                                                                                                                                                                                                                                                                                                                                                                                                                                                                                                                                                                                                                                                                                                                                                             | 22.8 (19.4, 26.8)        | 77.4% (70.5–85.0)                  |                          |                                    |                                 |                   |                   |                   |

|                          |                                                                                                                                                                                                                                                                                                                                                                                                                                                                                                                                                                                                                                               |                   |                   |                              |                   |
|--------------------------|-----------------------------------------------------------------------------------------------------------------------------------------------------------------------------------------------------------------------------------------------------------------------------------------------------------------------------------------------------------------------------------------------------------------------------------------------------------------------------------------------------------------------------------------------------------------------------------------------------------------------------------------------|-------------------|-------------------|------------------------------|-------------------|
|                          | $C_{max}$ (ng/ml)                                                                                                                                                                                                                                                                                                                                                                                                                                                                                                                                                                                                                             | 8.4 (6.8, 10.3)   | 11.9 (9.5, 14.9)  | 70.3% (60.0–82.2)            |                   |
|                          | $t_{max}$ (min)                                                                                                                                                                                                                                                                                                                                                                                                                                                                                                                                                                                                                               | Median = 8        | Median = 8        | Median diff: <0.1 (-1.0–2.0) |                   |
|                          | $t_{1/2}$ (h)                                                                                                                                                                                                                                                                                                                                                                                                                                                                                                                                                                                                                                 | 2.6 (2.3, 3.0)    | 2.5 (2.2, 2.8)    | 110.9% (101.7–120.9)         |                   |
|                          | <b>Ad libitum use</b>                                                                                                                                                                                                                                                                                                                                                                                                                                                                                                                                                                                                                         |                   |                   |                              |                   |
|                          | $C_{peak}$ (ng/ml)                                                                                                                                                                                                                                                                                                                                                                                                                                                                                                                                                                                                                            | 14.9 (12.3, 18.1) | 24.0 (21.7, 26.6) | 62.0% (53.6–71.8%)           |                   |
|                          | $C_{trough}$ (ng/ml)                                                                                                                                                                                                                                                                                                                                                                                                                                                                                                                                                                                                                          | 4.1 (2.4, 7.0)    | 12.3 (10.4, 14.6) | 33.5% (21.9–51.2)            |                   |
|                          | $t_{peak}$ (h)                                                                                                                                                                                                                                                                                                                                                                                                                                                                                                                                                                                                                                | Median = 12.9     | Median = 10.5     | Median diff: 1.6 (0.0, 2.4)  |                   |
|                          | Times used per day                                                                                                                                                                                                                                                                                                                                                                                                                                                                                                                                                                                                                            | 10.9 (SD=3.6)     | 16.7 (SD=3.5)     | 65.3%                        |                   |
|                          | Note: AUC <sub>0-last</sub> : area under plasma concentration-time curve from start of product use extrapolated to the last measurable concentration; $C_{max}$ : maximum observed plasma concentration; $t_{max}$ : time to maximum plasma concentration; $t_{1/2}$ : terminal elimination half-life; $C_{peak}$ : maximum observed plasma concentration; $C_{trough}$ : lowest observed plasma concentration during the same sampling interval in which $C_{peak}$ was observed; $t_{peak}$ : time to the maximum observed concentration                                                                                                    |                   |                   |                              |                   |
|                          | <b>Urges to smoke (QSU-brief) scores:</b>                                                                                                                                                                                                                                                                                                                                                                                                                                                                                                                                                                                                     |                   |                   |                              |                   |
|                          | <ul style="list-style-type: none"> <li>• After single use: similar transient reduction for both THS 2.1 and cigarette use (<math>-19.4 \pm 22.4</math> vs <math>-19.5 \pm 23.1</math>, respectively)</li> <li>• Following <i>ad libitum</i> use: for the THS 2.1 and cigarette the overall mean difference for the total score was 1.4 (95% CI: <math>-1.0</math>–<math>3.7</math>)</li> </ul>                                                                                                                                                                                                                                                |                   |                   |                              |                   |
|                          | <b>Cough assessment:</b> no apparent differences for cough frequency, cough intensity, or sputum production between the study groups                                                                                                                                                                                                                                                                                                                                                                                                                                                                                                          |                   |                   |                              |                   |
|                          | <b>Modified cigarette evaluation subscales' scores (THS 2.1 vs cigarette):</b>                                                                                                                                                                                                                                                                                                                                                                                                                                                                                                                                                                |                   |                   |                              |                   |
|                          | <b>Subjective effects of smoking subscales</b>                                                                                                                                                                                                                                                                                                                                                                                                                                                                                                                                                                                                | <b>Single use</b> |                   | <b>Ad libitum use</b>        |                   |
|                          |                                                                                                                                                                                                                                                                                                                                                                                                                                                                                                                                                                                                                                               | <b>THS 2.1</b>    | <b>Cigarettes</b> | <b>THS 2.1</b>               | <b>Cigarettes</b> |
|                          |                                                                                                                                                                                                                                                                                                                                                                                                                                                                                                                                                                                                                                               | <b>Mean (SD)</b>  | <b>Mean (SD)</b>  | <b>Mean (SD)</b>             | <b>Mean (SD)</b>  |
|                          | Smoking satisfaction                                                                                                                                                                                                                                                                                                                                                                                                                                                                                                                                                                                                                          | 4.1 (1.5)         | 4.6 (1.9)         | <b>3.3 (1.4)</b>             | <b>5.2 (1.2)</b>  |
|                          | Psychological rewards                                                                                                                                                                                                                                                                                                                                                                                                                                                                                                                                                                                                                         | 3.9 (1.2)         | 3.7 (1.4)         | <b>3.3 (1.5)</b>             | <b>4.1 (1.3)</b>  |
|                          | Enjoyment of respiratory tract sensation                                                                                                                                                                                                                                                                                                                                                                                                                                                                                                                                                                                                      | <b>3.6 (1.4)</b>  | <b>4.3 (1.8)</b>  | <b>2.6 (1.5)</b>             | <b>4.6 (1.6)</b>  |
|                          | Craving reduction                                                                                                                                                                                                                                                                                                                                                                                                                                                                                                                                                                                                                             | 4.7 (1.6)         | 4.6 (1.7)         | <b>3.9 (1.9)</b>             | <b>5.4 (1.3)</b>  |
|                          | Aversion                                                                                                                                                                                                                                                                                                                                                                                                                                                                                                                                                                                                                                      | <b>2.2 (1.5)</b>  | <b>3.0 (1.8)</b>  | 1.8 (1.1)                    | 1.7 (1.1)         |
|                          | <b>Bolded</b> are the statistically significant differences between two participants' groups                                                                                                                                                                                                                                                                                                                                                                                                                                                                                                                                                  |                   |                   |                              |                   |
| <b>Findings overview</b> | <ul style="list-style-type: none"> <li>• THS 2.1 provided lower exposure to nicotine compared with cigarettes both after single use and following <i>ad libitum</i> use</li> <li>• Following <i>ad libitum</i> use cigarette users had significantly higher peak and trough plasma nicotine levels than THS 2.1 users</li> <li>• Both cigarettes and THS 2.1 reduced urges to smoke similarly</li> <li>• THS 2.1 was perceived as less significantly satisfying, less reducing cravings, less enjoyable in relation to respiratory tract sensation, and less psychologically rewarding after <i>ad libitum</i> use than cigarettes</li> </ul> |                   |                   |                              |                   |

|                               |                                                                                                                                                                                                                                                                                                                                                                                                                                                                                                                                                                                                                                                                                                                                                                                                                                                                                                                                                                                                                                                                                                                                                                                                                                                                                                                                                                                                                                                                                                                                                                                                                                                                                                                                                                                                                                                                                                                                                                                                                                                                                                                                       |
|-------------------------------|---------------------------------------------------------------------------------------------------------------------------------------------------------------------------------------------------------------------------------------------------------------------------------------------------------------------------------------------------------------------------------------------------------------------------------------------------------------------------------------------------------------------------------------------------------------------------------------------------------------------------------------------------------------------------------------------------------------------------------------------------------------------------------------------------------------------------------------------------------------------------------------------------------------------------------------------------------------------------------------------------------------------------------------------------------------------------------------------------------------------------------------------------------------------------------------------------------------------------------------------------------------------------------------------------------------------------------------------------------------------------------------------------------------------------------------------------------------------------------------------------------------------------------------------------------------------------------------------------------------------------------------------------------------------------------------------------------------------------------------------------------------------------------------------------------------------------------------------------------------------------------------------------------------------------------------------------------------------------------------------------------------------------------------------------------------------------------------------------------------------------------------|
| <b>Authors, study year</b>    | Ludicke et al., 2017 & Ludicke et al., 2017 [10,Ludicke, 2017 #89]}                                                                                                                                                                                                                                                                                                                                                                                                                                                                                                                                                                                                                                                                                                                                                                                                                                                                                                                                                                                                                                                                                                                                                                                                                                                                                                                                                                                                                                                                                                                                                                                                                                                                                                                                                                                                                                                                                                                                                                                                                                                                   |
| <b>Funder/Affiliations</b>    | <b>Affiliations:</b> Philip Morris Products S.A., PMI Research and Development, Neuchâtel, Switzerland                                                                                                                                                                                                                                                                                                                                                                                                                                                                                                                                                                                                                                                                                                                                                                                                                                                                                                                                                                                                                                                                                                                                                                                                                                                                                                                                                                                                                                                                                                                                                                                                                                                                                                                                                                                                                                                                                                                                                                                                                                |
| <b>Primary aim</b>            | <ul style="list-style-type: none"> <li>Part 1: To compare exposure to HPHC during 5 days of use in confinement and further 85 days of use in an ambulatory setting</li> <li>Part 2: To compare effect on biologically and clinically relevant risk markers during 90 days of use</li> </ul>                                                                                                                                                                                                                                                                                                                                                                                                                                                                                                                                                                                                                                                                                                                                                                                                                                                                                                                                                                                                                                                                                                                                                                                                                                                                                                                                                                                                                                                                                                                                                                                                                                                                                                                                                                                                                                           |
| <b>Products used</b>          | <ul style="list-style-type: none"> <li>IQOS with menthol tobacco sticks</li> <li>Cigarettes: participants' preferred brand of menthol cigarettes</li> </ul>                                                                                                                                                                                                                                                                                                                                                                                                                                                                                                                                                                                                                                                                                                                                                                                                                                                                                                                                                                                                                                                                                                                                                                                                                                                                                                                                                                                                                                                                                                                                                                                                                                                                                                                                                                                                                                                                                                                                                                           |
| <b>Methods</b>                | <p><b>Design:</b> Randomised controlled trial</p> <p><b>Recruitment:</b> via the clinical site's database and by advertisements</p> <p><b>Study date and setting:</b> July 2013; Tokyo Heart Center Osaki Hospital, Japan</p> <p><b>Protocol registered:</b> 18 October, 2013 (NCT01970995 at clinicaltrials.org)</p> <p><b>Inclusion criteria:</b> healthy Japanese smokers; 23–65 years old; a body mass index of 18.5–32 kg/m<sup>2</sup>; smokers of ≥10 menthol CPD (nicotine ≤1 mg/cig) for 4 weeks prior start of the study; menthol cigarette smokers for ≥3 years before screening; do not plan to quit smoking in the next 3 months; ready to stop smoking for up to 90 days; ready to use the menthol IQOS tobacco sticks</p> <p><b>Exclusion criteria:</b> any medical, psychiatric, and/or social reason; legally incompetent, physically or mentally incapable of giving consent; medical condition requiring smoking cessation; use of nicotine-containing products other than menthol cigarettes or electronic cigarettes/similar devices within 4 weeks prior to enrolment; administration of drugs likely to affect CYP1A2 or CYP2A6 activity within 14 days or five half-lives of the drug 2 days before randomisation; administration of drugs within 14 days of Day 2 that were likely to interfere with the study objectives or the participant's safety; concomitant use of non-steroidal anti-inflammatory drugs (NSAIDs) or acetylsalicylic acid; positive alcohol test and/or history of alcohol abuse; positive urine drug test; positive serology test for human immunodeficiency virus, hepatitis B, or hepatitis C virus; donation/receipt of whole blood/blood products within 3 months prior to admission; current or former employee of the tobacco industry, or of their first-degree relatives (parent, sibling, or child); employee of the investigational site or of their first-degree relatives; participation in a clinical study within 3 months before screening; participation in the same study at a different time; pregnant/breast feeding; women not using effective contraception</p> |
| <b>Participants</b>           | 670 participants were screened; 454/670 (67.8%) were accepted before randomisation; 56/216 (25.9%) were not randomised<br>N=160; 57.5% male; mean age 37.2 ± 10.5; mean FTND=4.4 ± 1.9<br>Dropped-out: IQOS group=2; cigarette group=1; abstinence group=2                                                                                                                                                                                                                                                                                                                                                                                                                                                                                                                                                                                                                                                                                                                                                                                                                                                                                                                                                                                                                                                                                                                                                                                                                                                                                                                                                                                                                                                                                                                                                                                                                                                                                                                                                                                                                                                                            |
| <b>Interventions/Exposure</b> | <p>Randomised 2:1:1 to IQOS (n=78), menthol cigarette (n=42), and abstinence (n=40) conditions</p> <ul style="list-style-type: none"> <li>For first two baseline days in confinement participants smoked <i>ad libitum</i> their menthol cigarettes</li> <li>Then, for five days IQOS group <i>ad libitum</i> used menthol IQOS tobacco sticks, cigarette group continued to smoke their preferred menthol tobacco cigarettes, and abstinence group abstained from smoking. The abstinence group were provided with psychological support and the use of IQOS was strictly forbidden for the whole study duration (use of menthol or other cigarettes was not explicitly forbidden)</li> <li>During the 85-day ambulatory period, the participants returned to the study site and stayed overnight on the days 30, 60, and 90 visits. In the IQOS group during the ambulatory period dual use of IQOS and menthol cigarettes was possible. In the menthol cigarette and abstinence groups the use of IQOS was strictly forbidden. The use of nicotine replacement therapy was allowed during the ambulatory period in the abstinence group</li> </ul>                                                                                                                                                                                                                                                                                                                                                                                                                                                                                                                                                                                                                                                                                                                                                                                                                                                                                                                                                                                 |
| <b>Outcome/Key findings</b>   | <ul style="list-style-type: none"> <li>Part 1</li> </ul>                                                                                                                                                                                                                                                                                                                                                                                                                                                                                                                                                                                                                                                                                                                                                                                                                                                                                                                                                                                                                                                                                                                                                                                                                                                                                                                                                                                                                                                                                                                                                                                                                                                                                                                                                                                                                                                                                                                                                                                                                                                                              |

| Levels of biomarkers of exposure to HPHC at day 5 and day 90 in menthol IQOS, menthol cigarette and abstinence groups |                                                               |                            |                           |                           |                            |                            |
|-----------------------------------------------------------------------------------------------------------------------|---------------------------------------------------------------|----------------------------|---------------------------|---------------------------|----------------------------|----------------------------|
| Parent harmful and potentially harmful compound                                                                       | Geometric mean (95% CI) of exposure levels to HPHC biomarkers |                            |                           |                           |                            |                            |
|                                                                                                                       | Day 5                                                         |                            |                           | Day 90                    |                            |                            |
|                                                                                                                       | IQOS group                                                    | Smoking group              | Abstinence group          | IQOS group                | Smoking group              | Abstinence group           |
| Carbon monoxide (%)                                                                                                   | 2.48 (2.40, 2.57)                                             | 5.55 (5.06, 6.08)          | 2.50 (2.38, 2.64)         | 2.97 (2.88, 3.06)         | 5.73 (5.24, 6.25)          | 3.04 (2.84, 3.26)          |
| Acrolein (ng/mg creat)                                                                                                | 304.68 (284.63, 326.14)                                       | 591.33 (507.72, 688.69)    | 186.71 (163.39, 213.36)   | 386.37 (356.30, 418.97)   | 695.58 (602.43, 803.13)    | 276.13 (242.11, 314.93)    |
| 1,3-butadiene (pg/mg creat)                                                                                           | 81.71 (75.52, 88.41)                                          | 622.58 (454.60, 852.64)    | 80.72 (70.92, 91.88)      | 141.74 (120.62, 166.57)   | 785.27 (576.82, 1069.04)   | 136.83 (114.40, 163.66)    |
| Benzene (pg/mg creat)                                                                                                 | 118.36 (107.37, 130.48)                                       | 1096.47 (805.13, 1493.22)  | 102.51 (85.19, 123.34)    | 145.58 (121.67, 174.18)   | 1157.25 (848.59, 1578.17)  | 144.07 (109.87, 188.92)    |
| Nicotine-derived nitrosamine ketone (NNK) (pg/mg creat)                                                               | 37.90 (32.29, 44.48)                                          | 85.94 (70.93, 104.13)      | 29.58 (22.24, 39.35)      | 23.23 (19.34, 27.91)      | 95.03 (77.31, 116.82)      | 13.95 (9.00, 21.60)        |
| Pyrene (pg/mg creat)                                                                                                  | 46.36 (41.68, 51.55)                                          | 122.90 (104.71, 144.26)    | 41.14 (35.42, 47.78)      | 85.47 (76.64, 95.33)      | 167.38 (146.23, 191.58)    | 88.21 (75.53, 103.01)      |
| N-nitrosornicotine (NNN) (pg/mg creat)                                                                                | 1.20 (0.97, 1.49)                                             | 4.10 (2.94, 5.73)          | 0.15 (0.12, 0.18)         | 1.40 (1.13, 1.73)         | 4.28 (3.03, 6.05)          | 0.26 (0.17, 0.40)          |
| 4-Aminobiphenyl (pg/mg creat)                                                                                         | 1.97 (1.76, 2.21)                                             | 9.50 (8.15, 11.07)         | 2.16 (1.87, 2.50)         | 2.07 (1.82, 2.36)         | 9.62 (8.12, 11.39)         | 2.35 (1.90, 2.89)          |
| 1-aminonaphthalene (pg/mg creat)                                                                                      | 3.14 (2.85, 3.46)                                             | 53.27 (45.86, 61.89)       | 2.85 (2.50, 3.26)         | 3.55 (2.96, 4.26)         | 55.34 (46.21, 66.26)       | 4.22 (3.20, 5.55)          |
| 2-aminonaphthalene (pg/mg creat)                                                                                      | 1.97 (1.80, 2.15)                                             | 14.23 (12.18, 16.62)       | 2.04 (1.82, 2.28)         | 2.34 (2.11, 2.59)         | 14.84 (12.63, 17.44)       | 2.63 (2.20, 3.15)          |
| o-toluidine (pg/mg creat)                                                                                             | 51.64 (45.52, 58.59)                                          | 127.28 (103.27, 156.88)    | 48.82 (40.94, 58.21)      | 68.35 (53.91, 86.67)      | 125.64 (96.13, 164.20)     | 77.86 (56.72, 106.88)      |
| Acrylonitrile (ng/mg creat)                                                                                           | 12.43 (11.12, 13.90)                                          | 68.17 (56.39, 82.40)       | 11.78 (9.84, 14.10)       | 7.91 (6.74, 9.29)         | 83.98 (69.17, 101.95)      | 8.41 (5.99, 11.81)         |
| Ethylene oxide (pg/mg creat)                                                                                          | 1137.96 (995.5, 1300.81)                                      | 2235.37 (1742.88, 2867.03) | 1113.73 (923.72, 1342.83) | 1741.53 (1510.19, 2008.3) | 3739.46 (2858.39, 4892.12) | 1633.12 (1286.77, 2072.69) |
| Crotonaldehyde (ng/mg creat)                                                                                          | 124.47 (115.36, 134.30)                                       | 286.80 (251.37, 327.21)    | 113.48 (99.38, 129.59)    | 154.30 (137.07, 173.70)   | 299.41 (260.62, 343.97)    | 158.57 (132.95, 189.14)    |
| Benzo(a)pyrene                                                                                                        | 20.72 (18.61, 22.83)                                          | 75.10 (62.60, 87.60)       | 17.84 (15.45, 20.23)      | 30.02 (25.29, 34.75)      | 86.92 (71.78, 102.06)      | 28.88 (22.56, 35.20)       |



|                                      |                   |                   |                   |                   |                   |                   |
|--------------------------------------|-------------------|-------------------|-------------------|-------------------|-------------------|-------------------|
| (fg/mg creat)                        | 23.07)            | 90.08)            | 20.58)            | 35.65)            | 105.27)           | 36.98)            |
| Nicotine equivalents<br>(mg/g creat) | 6.16 (5.55, 6.83) | 5.22 (4.35, 6.27) | 0.16 (0.12, 0.20) | 6.85 (5.96, 7.88) | 6.33 (5.11, 7.84) | 0.37 (0.18, 0.78) |

Note: creat: creatinine.

**Daily use of IQOS menthol tobacco sticks and menthol cigarettes**

| Time       | Mean (SD) menthol IQOS | Mean (SD) menthol cigarettes | % IQOS:Cigarettes |
|------------|------------------------|------------------------------|-------------------|
| Day 1      | 11.4 (3.9)             | 11.0 (4.0)                   | 103.6%            |
| Day 5      | 13.9 (4.3)             | 13.6 (4.7)                   | 102.2%            |
| Days 6–30  | 11.7 (6.0)             | 13.8 (4.2)                   | 84.8%             |
| Days 30–60 | 12.7 (6.3)             | 14.9 (5.7)                   | 85.2%             |
| Days 60–90 | 12.7 (6.5)             | 15.2 (5.0)                   | 83.6%             |

**Human puffing topography** (results in figures only, summary is based on authors’ verbatim presentation of results)

- During confinement period:
  - Total smoking duration: decreased in IQOS and were stable in menthol cigarette group
  - Total number of puffs: at baseline IQOS group > menthol cigarette group, stable in both groups during confinement
  - Average puff interval: decreased in IQOS group and remained stable in menthol cigarette group
- During ambulatory period:
  - Total smoking duration: decreased in both groups
  - Total number of puffs: IQOS group > menthol cigarette group on day 90
  - Average puff interval: IQOS group < menthol cigarette group
  - Total puff volume: comparable in IQOS and menthol cigarette groups
  - Average puff volume: IQOS < menthol cigarette group

**Subjective effects of smoking** (results in figures only; summary is based on authors’ verbatim presentation of results)

- The IQOS scores (modified cigarette evaluation questionnaire) for the Craving Reduction, Enjoyment of Respiratory Tract Sensations, Psychological Reward, and Smoking Satisfaction subscales were lower in the IQOS group than in the menthol cigarette group from days 1 until 30. There was a negligible difference in the aversion subscale.
- From day 30 onwards, the subscale scores were comparable between the IQOS and menthol cigarette groups.

**Urges to smoke (QSU-brief) questionnaire**

- The QSU-brief total scores remained fairly stable in the IQOS and menthol cigarette groups throughout the confinement and ambulatory periods, albeit the scores were slightly higher in the IQOS group.

Part 2

|                                 |                                                                                                                                                                                                                                                                                                                                                                                                                                                                                                                                                                                                                                                                                                                                                                                                                                                                                                                                                                                                                                                                                                                                                                                                                                                                                                                                                                                                                                                                                                                                                                                                                                                                                                                                                                                                                                                                                                                                                                                                                                                                                                                                                                                                  |
|---------------------------------|--------------------------------------------------------------------------------------------------------------------------------------------------------------------------------------------------------------------------------------------------------------------------------------------------------------------------------------------------------------------------------------------------------------------------------------------------------------------------------------------------------------------------------------------------------------------------------------------------------------------------------------------------------------------------------------------------------------------------------------------------------------------------------------------------------------------------------------------------------------------------------------------------------------------------------------------------------------------------------------------------------------------------------------------------------------------------------------------------------------------------------------------------------------------------------------------------------------------------------------------------------------------------------------------------------------------------------------------------------------------------------------------------------------------------------------------------------------------------------------------------------------------------------------------------------------------------------------------------------------------------------------------------------------------------------------------------------------------------------------------------------------------------------------------------------------------------------------------------------------------------------------------------------------------------------------------------------------------------------------------------------------------------------------------------------------------------------------------------------------------------------------------------------------------------------------------------|
|                                 | <p><b>Changes in risk markers at day 90: least squares (LS) mean ratio (IQOS : menthol cigarette) in % (95% CI; p)</b></p> <ul style="list-style-type: none"> <li>• Endothelial dysfunction: soluble intercellular adhesion molecule-1 (sICAM-1; ng/ml) = 91.28% (85.06–97.95; p=.0116)</li> <li>• Oxidative stress: 8-epi-prostaglandin F2α (8-epi-PGF2α; pg/mg creat) = 87.29% (78.19–97.45; p=.0159)</li> <li>• Platelet activation 11-dehydro-thromboxane B2 (11-DTX-B2; pg/mg creat) = 91.02% (80.48–102.94; p=.1327)</li> <li>• Cardiovascular risk factors:</li> <li>• Fibrinogen (mg/dL) = 94.58% (87.87–101.8; p=.136)</li> <li>• Homocysteine (μmol/L) = 100.66% (93.35–108.54; p=.8638)</li> <li>• High-sensitivity C-reactive protein (hs-CRP) (mg/L) = 93.59% (62.23–140.75; p=.7487)</li> <li>• Metabolic syndrome: Glucose (mg/dL) = 98.8% (96.42–101.6; p=.437)</li> </ul> <p><b>Changes in risk markers at day 90: least squares (LS) mean difference (IQOS : menthol cigarette) (95% CI; p); proportion (%) of IQOS and menthol cigarette groups' arithmetic means</b></p> <ul style="list-style-type: none"> <li>• Inflammation: white blood cell count (WBC) (GI/L) = -0.57 (-1.03, -0.1; p=0.0173); 91.7%</li> <li>• Lipid metabolism:</li> <li>• Low-density lipoprotein (LDL) cholesterol (mg/dL) = 0.9 (-6.6, 8.3; p=.8162); 99.4%</li> <li>• High-density lipoprotein (HDL) cholesterol (mg/dL) = 4.5 (1.1, 7.9; p=.0084); 103.1%</li> <li>• Triglycerides (mg/dL) = -6.3 (-21.2, 8.7; p=.4095); 100.9%</li> <li>• Total cholesterol (mg/dL) = 2.0 (-6.7, 10.7; p=.6499); 99.5%</li> <li>• Metabolic syndrome</li> <li>• Hemoglobin A1c (%) = 0.02 (-0.06, 0.1; p=.5866); 99.4%</li> <li>• Body weight (kg) = -0.09 (-0.75, 0.57; p=.7926); 100.4%</li> <li>• Waist circumference (cm) = 1.6 (-2.4, 5.6; p=.4251); 101.0%</li> <li>• Cardiovascular risk factors</li> <li>• Systolic blood pressure (mmHg) = -0.59 (-3.8, 2.62; p=.7157); 98.8%</li> <li>• Diastolic blood pressure (mmHg) = -0.68 (-3.04, 1.69; p=.5705); 98.3%</li> <li>• Lung function: Forced expiratory volume in 1 second (% of those predicted) = 1.91 (-0.14, 3.97; p=.0669); 101.6%</li> </ul> |
| <p><b>Findings overview</b></p> | <ul style="list-style-type: none"> <li>• Switching from menthol cigarette use to menthol IQOS use reduced exposure to HPHC after five days in confinement and to a lesser extent after further 85 days throughout the ambulatory setting</li> <li>• Use of IQOS provided similar level of nicotine as smoking menthol cigarettes</li> <li>• Smaller and more frequent puffs with a shorter inter-puff interval and a lower average puff volume were taken with the IQOS than with menthol cigarettes</li> <li>• IQOS group on average used similar number of tobacco sticks per day during confinement as menthol cigarette smokers but less tobacco sticks throughout ambulatory period compared with menthol cigarette smokers</li> <li>• Participants rated menthol IQOS lower on four out of five subjective experience subscales than menthol cigarettes, these scores balanced after 25 days in ambulatory settings</li> </ul>                                                                                                                                                                                                                                                                                                                                                                                                                                                                                                                                                                                                                                                                                                                                                                                                                                                                                                                                                                                                                                                                                                                                                                                                                                                             |

|                               |                                                                                                                                                                                                                                                                                                                                                                                                                                                                                                                                                                                                                                                                                                                                                                                                                                                                                                                                                                                                                                                                                                                                                                                                                                                                                                                                                                           |
|-------------------------------|---------------------------------------------------------------------------------------------------------------------------------------------------------------------------------------------------------------------------------------------------------------------------------------------------------------------------------------------------------------------------------------------------------------------------------------------------------------------------------------------------------------------------------------------------------------------------------------------------------------------------------------------------------------------------------------------------------------------------------------------------------------------------------------------------------------------------------------------------------------------------------------------------------------------------------------------------------------------------------------------------------------------------------------------------------------------------------------------------------------------------------------------------------------------------------------------------------------------------------------------------------------------------------------------------------------------------------------------------------------------------|
|                               | <ul style="list-style-type: none"> <li>Switching from smoking menthol cigarettes to using menthol IQOS was associated with improvement in risk markers linked to oxidative stress, endothelial dysfunction, lipid metabolism, inflammation, and lung function</li> <li>Authors did not ascertain what part of abstinence group was still abstinent at 90-days follow-up</li> </ul>                                                                                                                                                                                                                                                                                                                                                                                                                                                                                                                                                                                                                                                                                                                                                                                                                                                                                                                                                                                        |
| <b>Authors, study year</b>    | <b>Gee et al., 2017 [12]</b>                                                                                                                                                                                                                                                                                                                                                                                                                                                                                                                                                                                                                                                                                                                                                                                                                                                                                                                                                                                                                                                                                                                                                                                                                                                                                                                                              |
| <b>Funder/Affiliations</b>    | <b>Affiliations:</b> British American Tobacco, Group Research and Development, Regents Park Road, Southampton, SO15 8TL, UK                                                                                                                                                                                                                                                                                                                                                                                                                                                                                                                                                                                                                                                                                                                                                                                                                                                                                                                                                                                                                                                                                                                                                                                                                                               |
| <b>Primary aim</b>            | To compare the puffing topography, mouth level exposure, and average daily consumption                                                                                                                                                                                                                                                                                                                                                                                                                                                                                                                                                                                                                                                                                                                                                                                                                                                                                                                                                                                                                                                                                                                                                                                                                                                                                    |
| <b>Products used</b>          | <ul style="list-style-type: none"> <li>Glo HnB product: with Bright Tobacco Kent Neostiks and mentholated Intensely Fresh Kent Neostiks (Japan)</li> <li>Cigarettes: according to participants' preferred type, either Lucky Strike Regular (7 mg tar ISO) or Lucky Strike Menthol (7 mg tar ISO) (Japan)</li> <li>IQOS: with Essence tobacco sticks (Japan)</li> </ul>                                                                                                                                                                                                                                                                                                                                                                                                                                                                                                                                                                                                                                                                                                                                                                                                                                                                                                                                                                                                   |
| <b>Methods</b>                | <p><b>Design:</b> Randomised crossover experimental trial</p> <p><b>Recruitment:</b> participants were recruited by a market research agency.</p> <p><b>Study time and setting:</b> 2016, Tokyo, Japan</p> <p><b>Protocol registered:</b> not reported</p> <p><b>Inclusion criteria:</b> Adult Japanese smokers naïve to heat-not-burn products, between 21 years and 7 months and 64 years of age, smokers of 5 or more menthol and non-menthol cigarettes per day (7–8 mg tar yield ISO) or users of IQOS for five or more sessions per day for a minimum of 3 months, including dual IQOS and cigarette users.</p> <p><b>Exclusion criteria:</b> possibility of pregnancy.</p> <p><b>Measures:</b> Natural puffing topography, mouth level exposure to tar and nicotine, and average daily consumption of test products</p>                                                                                                                                                                                                                                                                                                                                                                                                                                                                                                                                            |
| <b>Participants</b>           | Numbers of screened and excluded participants not reported<br>N=208, 52% female, mostly from 30–44 years old age group (52%).                                                                                                                                                                                                                                                                                                                                                                                                                                                                                                                                                                                                                                                                                                                                                                                                                                                                                                                                                                                                                                                                                                                                                                                                                                             |
| <b>Interventions/Exposure</b> | <p>Randomised 1:1:1:1 to:</p> <ul style="list-style-type: none"> <li>Group 1: three non-mentholated products randomly provided for 4-days familiarisation periods with Lucky Strike Regular cigarettes, glo with Bright Tobacco Kent Neostiks, and IQOS with Essence tobacco sticks.</li> <li>Group 2: two mentholated products randomly provided for 4-days familiarisation periods with Lucky Strike Menthol and glo with mentholated Intensely Fresh Kent Neostiks</li> <li>Group 3: two heat-not-burn products randomly provided for 4-days familiarisation periods with glo with Bright Tobacco Kent Neostiks and IQOS with Essence tobacco sticks.</li> <li>Group 4: completed a glo use session with regular tobacco sticks to assess mouth insertion depth.</li> </ul> <ul style="list-style-type: none"> <li>Participants in groups 1–3 during the product familiarisation periods were asked to replace their regularly used cigarettes with provided test products and record their consumption in their diary</li> <li>On day 5 of each product placement period, the participants attended the central location where their puffing topography was measured with the SA7 puffing topography device. The puffing topography was measured and recorded in duplicate for each study product with a minimum of a 20 minute break in-between sessions.</li> </ul> |

|                             | Puffing topography and daily consumption of cigarettes, glo and IQOS products                                                                                                                                                                                                                                                                                                                                                                                                                                                                                                                                                                                |                            |                      |                       |                             |                       |                       |                        |
|-----------------------------|--------------------------------------------------------------------------------------------------------------------------------------------------------------------------------------------------------------------------------------------------------------------------------------------------------------------------------------------------------------------------------------------------------------------------------------------------------------------------------------------------------------------------------------------------------------------------------------------------------------------------------------------------------------|----------------------------|----------------------|-----------------------|-----------------------------|-----------------------|-----------------------|------------------------|
|                             |                                                                                                                                                                                                                                                                                                                                                                                                                                                                                                                                                                                                                                                              | Group 1                    |                      |                       | Group 2                     |                       | Group 3               |                        |
|                             | Puffing topography measure                                                                                                                                                                                                                                                                                                                                                                                                                                                                                                                                                                                                                                   | Regular cigarette Mean ±SD | Regular glo Mean ±SD | Regular IQOS Mean ±SD | Menthol cigarette Mean ± SD | Menthol glo Mean ± SD | Regular glo Mean ± SD | Regular IQOS Mean ± SD |
| <b>Outcome/Key findings</b> | Total puff volume (ml)                                                                                                                                                                                                                                                                                                                                                                                                                                                                                                                                                                                                                                       | <b>489.0 ± 177.7</b>       | <b>736.4 ± 415.8</b> | 668.1 ± 322.6         | 493.7 ± 192.4               | 618.2 ± 389.6         | 773.5 ± 545.7         | 588.0 ± 360.0          |
|                             | Mean puff volume (ml)                                                                                                                                                                                                                                                                                                                                                                                                                                                                                                                                                                                                                                        | 48.9 ± 14.8                | <b>66.7 ± 23.7</b>   | 63.5 ± 20.3           | <b>51.1 ± 16.0</b>          | <b>62.2 ± 32.8</b>    | <b>60.9 ± 24.8</b>    | <b>55.1 ± 23.9</b>     |
|                             | Number of puffs (n/stick)                                                                                                                                                                                                                                                                                                                                                                                                                                                                                                                                                                                                                                    | 10.7 ± 5.0                 | 10.9 ± 5.6           | 10.3 ± 3.6            | 10.0 ± 3.7                  | 10.0 ± 4.5            | 12.3 ± 7.3            | 10.8 ± 5.1             |
|                             | Mean puff duration (s)                                                                                                                                                                                                                                                                                                                                                                                                                                                                                                                                                                                                                                       | 1.8 ± 0.6                  | 1.8 ± 0.6            | 1.8 ± 0.6             | 2.0 ± 0.5                   | 1.8 ± 0.5             | 1.8 ± 0.7             | 1.8 ± 0.7              |
|                             | Mean puff interval (s)                                                                                                                                                                                                                                                                                                                                                                                                                                                                                                                                                                                                                                       | <b>9.7 ± 3.4</b>           | 7.4 ± 2.7            | 8.3 ± 3.0             | <b>9.9 ± 3.4</b>            | <b>8.1 ± 3.0</b>      | 7.7 ± 3.9             | 8.6 ± 3.1              |
|                             | Average daily consumption                                                                                                                                                                                                                                                                                                                                                                                                                                                                                                                                                                                                                                    | <b>16.3 ± 7.9</b>          | <b>12.1 ± 5.5</b>    | <b>13.7 ± 5.6</b>     | <b>15.6 ± 6.9</b>           | <b>13.1 ± 6.0</b>     | <b>11.2 ± 6.2</b>     | <b>13.4 ± 7.8</b>      |
|                             | <b>Bolded</b> are the cells that differ statistically significantly from other groups                                                                                                                                                                                                                                                                                                                                                                                                                                                                                                                                                                        |                            |                      |                       |                             |                       |                       |                        |
| <b>Authors' conclusions</b> | <ul style="list-style-type: none"> <li>• In general, total and mean puff volumes were larger for glo than for cigarettes</li> <li>• Puff intervals were shortest for glo tobacco product use</li> <li>• There was lack of difference in puffing behaviour between naïve glo users and regular IQOS users (except for mean puff volume) which suggests that a familiarisation of 4 days is sufficient</li> <li>• Mean mouth insertion depth between users of glo was 7.7 mm, which suggests that the air inlet zone was not blocked by the users</li> </ul>                                                                                                   |                            |                      |                       |                             |                       |                       |                        |
| <b>Authors, study year</b>  | Yuki et al., 2017 [4]                                                                                                                                                                                                                                                                                                                                                                                                                                                                                                                                                                                                                                        |                            |                      |                       |                             |                       |                       |                        |
| <b>Funder/Affiliations</b>  | Affiliations: Scientific Product Assessment Centre, R&D Group, Japan Tobacco Inc., Japan                                                                                                                                                                                                                                                                                                                                                                                                                                                                                                                                                                     |                            |                      |                       |                             |                       |                       |                        |
| <b>Primary aim</b>          | To compare the pharmacokinetics of nicotine delivery                                                                                                                                                                                                                                                                                                                                                                                                                                                                                                                                                                                                         |                            |                      |                       |                             |                       |                       |                        |
| <b>Products used</b>        | <ul style="list-style-type: none"> <li>• Prototype novel tobacco vapour (PNTV) product</li> <li>• Cigarettes</li> </ul>                                                                                                                                                                                                                                                                                                                                                                                                                                                                                                                                      |                            |                      |                       |                             |                       |                       |                        |
| <b>Methods</b>              | <p><b>Design:</b> Randomised crossover experimental trial</p> <p><b>Recruitment:</b> the recruitment procedure is not described</p> <p><b>Study time and setting:</b> time is not reported, single centre in Japan</p> <p><b>Protocol registered:</b> not reported</p> <p><b>Inclusion criteria:</b> Healthy Japanese adult male smokers aged 21–65 years, smoked an average of 11 or more cigarettes per day, and had smoked for at least 12 months before entering the trial.</p> <p><b>Exclusion criteria:</b> body mass index less than 18.5 or more than 25 kg/m<sup>2</sup>, urinary cotinine level less than 200 ng/ml at screening, had used any</p> |                            |                      |                       |                             |                       |                       |                        |

|                                       | <p>prescription smoking cessation treatment within last 4 weeks before entering the study</p> <p><b>Measures:</b> the mouth level exposure of nicotine in cigarette smoking, analysis of the amount of nicotine delivered in the aerosol of PNTV, pharmacokinetics of the tested products was measured by collecting blood samples for plasma nicotine analysis</p>                                                                                                                                                                                                                                                                                                                                                                                                                                                                                                                                                                                                                                                                                                                                                                                                                                                                                                                                                                                                                                                                                                                                            |                                                    |                                 |                          |                                 |                                       |                                                    |                                                    |              |                                 |                          |                          |                             |                          |                          |                          |                             |                        |                                   |                                   |      |                      |                   |                   |                     |
|---------------------------------------|----------------------------------------------------------------------------------------------------------------------------------------------------------------------------------------------------------------------------------------------------------------------------------------------------------------------------------------------------------------------------------------------------------------------------------------------------------------------------------------------------------------------------------------------------------------------------------------------------------------------------------------------------------------------------------------------------------------------------------------------------------------------------------------------------------------------------------------------------------------------------------------------------------------------------------------------------------------------------------------------------------------------------------------------------------------------------------------------------------------------------------------------------------------------------------------------------------------------------------------------------------------------------------------------------------------------------------------------------------------------------------------------------------------------------------------------------------------------------------------------------------------|----------------------------------------------------|---------------------------------|--------------------------|---------------------------------|---------------------------------------|----------------------------------------------------|----------------------------------------------------|--------------|---------------------------------|--------------------------|--------------------------|-----------------------------|--------------------------|--------------------------|--------------------------|-----------------------------|------------------------|-----------------------------------|-----------------------------------|------|----------------------|-------------------|-------------------|---------------------|
| <b>Participants</b>                   | <p>Numbers of screened and excluded participants not reported</p> <p>N=24 (all completed the study), mean age 39 years (range: 21–63), mean tar value of subjects' usual brand of cigarettes 8.8 mg (range: 1–18 mg), mean daily cigarette consumption 18.1 cigarettes (range: 12–30), mean smoking history 18.9 years (range: 1–43 years).</p>                                                                                                                                                                                                                                                                                                                                                                                                                                                                                                                                                                                                                                                                                                                                                                                                                                                                                                                                                                                                                                                                                                                                                                |                                                    |                                 |                          |                                 |                                       |                                                    |                                                    |              |                                 |                          |                          |                             |                          |                          |                          |                             |                        |                                   |                                   |      |                      |                   |                   |                     |
| <b>Interventions/Exposure</b>         | <p><b>Procedure:</b> on Day 1 subjects checked in to a clinic and abstained from tobacco use. On days 2–3 participants used a PNTV or smoked a single cigarette under controlled use (10 puffs for 3 minutes at approximately 20 seconds intervals). On day 4 participants were discharged.</p>                                                                                                                                                                                                                                                                                                                                                                                                                                                                                                                                                                                                                                                                                                                                                                                                                                                                                                                                                                                                                                                                                                                                                                                                                |                                                    |                                 |                          |                                 |                                       |                                                    |                                                    |              |                                 |                          |                          |                             |                          |                          |                          |                             |                        |                                   |                                   |      |                      |                   |                   |                     |
| <b>Outcome/Key findings</b>           | <p><b>Nicotine delivery pharmacokinetics of PNTV single use in comparison with cigarettes</b></p> <table border="1"> <thead> <tr> <th></th> <th>PNTV, mean (95% CI)</th> <th>Cigarette, mean (95% CI)</th> <th>PNTV : Cigarette ratio (95% CI)</th> </tr> </thead> <tbody> <tr> <td>Mouth level of nicotine exposure (mg)</td> <td><b>Median=0.355</b><br/><b>(range: 0.180–0.580)</b></td> <td><b>Median=0.540</b><br/><b>(range: 0.310–0.940)</b></td> <td><b>65.7%</b></td> </tr> <tr> <td>AUC<sub>0–last</sub> (ng h/ml)</td> <td><b>4.12 (3.43, 4.95)</b></td> <td><b>6.03 (5.02, 7.25)</b></td> <td><b>68.3% (54.3%, 85.9%)</b></td> </tr> <tr> <td>C<sub>max</sub> (ng/ml)</td> <td><b>5.39 (4.34, 6.69)</b></td> <td><b>11.8 (9.49, 14.6)</b></td> <td><b>45.7% (34.1%, 61.4%)</b></td> </tr> <tr> <td>t<sub>mac</sub> (min)</td> <td>Median=3.83<br/>(range: 2.83–7.83)</td> <td>Median=3.83<br/>(range: 2.83–4.83)</td> <td>100%</td> </tr> <tr> <td>t<sub>1/2</sub> (h)</td> <td>1.66 (1.41, 1.95)</td> <td>1.86 (1.58, 2.19)</td> <td>89.1% (78.2%, 102%)</td> </tr> </tbody> </table> <p>Note: <b>Bolded</b> are statistically significant differences between tested products; AUC<sub>0–last</sub>: area under plasma concentration-time curve from start of product use extrapolated to the last measurable concentration; C<sub>max</sub>: maximum observed plasma concentration; t<sub>mac</sub>: time to maximum plasma concentration; t<sub>1/2</sub>: terminal elimination half-life.</p> |                                                    | PNTV, mean (95% CI)             | Cigarette, mean (95% CI) | PNTV : Cigarette ratio (95% CI) | Mouth level of nicotine exposure (mg) | <b>Median=0.355</b><br><b>(range: 0.180–0.580)</b> | <b>Median=0.540</b><br><b>(range: 0.310–0.940)</b> | <b>65.7%</b> | AUC <sub>0–last</sub> (ng h/ml) | <b>4.12 (3.43, 4.95)</b> | <b>6.03 (5.02, 7.25)</b> | <b>68.3% (54.3%, 85.9%)</b> | C <sub>max</sub> (ng/ml) | <b>5.39 (4.34, 6.69)</b> | <b>11.8 (9.49, 14.6)</b> | <b>45.7% (34.1%, 61.4%)</b> | t <sub>mac</sub> (min) | Median=3.83<br>(range: 2.83–7.83) | Median=3.83<br>(range: 2.83–4.83) | 100% | t <sub>1/2</sub> (h) | 1.66 (1.41, 1.95) | 1.86 (1.58, 2.19) | 89.1% (78.2%, 102%) |
|                                       | PNTV, mean (95% CI)                                                                                                                                                                                                                                                                                                                                                                                                                                                                                                                                                                                                                                                                                                                                                                                                                                                                                                                                                                                                                                                                                                                                                                                                                                                                                                                                                                                                                                                                                            | Cigarette, mean (95% CI)                           | PNTV : Cigarette ratio (95% CI) |                          |                                 |                                       |                                                    |                                                    |              |                                 |                          |                          |                             |                          |                          |                          |                             |                        |                                   |                                   |      |                      |                   |                   |                     |
| Mouth level of nicotine exposure (mg) | <b>Median=0.355</b><br><b>(range: 0.180–0.580)</b>                                                                                                                                                                                                                                                                                                                                                                                                                                                                                                                                                                                                                                                                                                                                                                                                                                                                                                                                                                                                                                                                                                                                                                                                                                                                                                                                                                                                                                                             | <b>Median=0.540</b><br><b>(range: 0.310–0.940)</b> | <b>65.7%</b>                    |                          |                                 |                                       |                                                    |                                                    |              |                                 |                          |                          |                             |                          |                          |                          |                             |                        |                                   |                                   |      |                      |                   |                   |                     |
| AUC <sub>0–last</sub> (ng h/ml)       | <b>4.12 (3.43, 4.95)</b>                                                                                                                                                                                                                                                                                                                                                                                                                                                                                                                                                                                                                                                                                                                                                                                                                                                                                                                                                                                                                                                                                                                                                                                                                                                                                                                                                                                                                                                                                       | <b>6.03 (5.02, 7.25)</b>                           | <b>68.3% (54.3%, 85.9%)</b>     |                          |                                 |                                       |                                                    |                                                    |              |                                 |                          |                          |                             |                          |                          |                          |                             |                        |                                   |                                   |      |                      |                   |                   |                     |
| C <sub>max</sub> (ng/ml)              | <b>5.39 (4.34, 6.69)</b>                                                                                                                                                                                                                                                                                                                                                                                                                                                                                                                                                                                                                                                                                                                                                                                                                                                                                                                                                                                                                                                                                                                                                                                                                                                                                                                                                                                                                                                                                       | <b>11.8 (9.49, 14.6)</b>                           | <b>45.7% (34.1%, 61.4%)</b>     |                          |                                 |                                       |                                                    |                                                    |              |                                 |                          |                          |                             |                          |                          |                          |                             |                        |                                   |                                   |      |                      |                   |                   |                     |
| t <sub>mac</sub> (min)                | Median=3.83<br>(range: 2.83–7.83)                                                                                                                                                                                                                                                                                                                                                                                                                                                                                                                                                                                                                                                                                                                                                                                                                                                                                                                                                                                                                                                                                                                                                                                                                                                                                                                                                                                                                                                                              | Median=3.83<br>(range: 2.83–4.83)                  | 100%                            |                          |                                 |                                       |                                                    |                                                    |              |                                 |                          |                          |                             |                          |                          |                          |                             |                        |                                   |                                   |      |                      |                   |                   |                     |
| t <sub>1/2</sub> (h)                  | 1.66 (1.41, 1.95)                                                                                                                                                                                                                                                                                                                                                                                                                                                                                                                                                                                                                                                                                                                                                                                                                                                                                                                                                                                                                                                                                                                                                                                                                                                                                                                                                                                                                                                                                              | 1.86 (1.58, 2.19)                                  | 89.1% (78.2%, 102%)             |                          |                                 |                                       |                                                    |                                                    |              |                                 |                          |                          |                             |                          |                          |                          |                             |                        |                                   |                                   |      |                      |                   |                   |                     |
| <b>Authors' conclusions</b>           | <ul style="list-style-type: none"> <li>As there was no significant difference in time to maximum nicotine plasma concentration, PNTV product seems to deliver nicotine via similar absorption sites as cigarettes</li> <li>Mouth level exposure to nicotine, maximum observed nicotine plasma concentration and exposure to nicotine after single use of the tested products were significantly lower for PNTV product in comparison with use of a single cigarette. PNTV product provided less nicotine than a cigarette following controlled use</li> </ul>                                                                                                                                                                                                                                                                                                                                                                                                                                                                                                                                                                                                                                                                                                                                                                                                                                                                                                                                                  |                                                    |                                 |                          |                                 |                                       |                                                    |                                                    |              |                                 |                          |                          |                             |                          |                          |                          |                             |                        |                                   |                                   |      |                      |                   |                   |                     |

Table A4 Findings of epidemiology studies on heat not burn use

|                             |                                                                                                                                                                                                                                                                                                                                                                                                                                                                                                                                                                                                                                                                                                             |
|-----------------------------|-------------------------------------------------------------------------------------------------------------------------------------------------------------------------------------------------------------------------------------------------------------------------------------------------------------------------------------------------------------------------------------------------------------------------------------------------------------------------------------------------------------------------------------------------------------------------------------------------------------------------------------------------------------------------------------------------------------|
| <b>Authors, study year</b>  | <b>Tabuchi et al., 2016 [31]</b>                                                                                                                                                                                                                                                                                                                                                                                                                                                                                                                                                                                                                                                                            |
| <b>Funder/Affiliations</b>  | <p><b>Affiliations:</b></p> <ul style="list-style-type: none"> <li>Center for Cancer Control and Statistics, Osaka Medical Center for Cancer and Cardiovascular Diseases, Osaka, Japan</li> <li>Department of Public Health, Tokyo Women’s Medical University, Tokyo, Japan</li> <li>Department of Economics, Keio University, Tokyo, Japan</li> <li>Department of Environmental Health, National Institute of Public Health, Saitama, Japan</li> </ul> <p><b>Funding:</b></p> <ul style="list-style-type: none"> <li>Ministry of Health, Labour and Welfare: Comprehensive Research on Lifestyle Related Diseases including Cardiovascular Diseases and Diabetes Mellitus (H25-010 and H26-023)</li> </ul> |
| <b>Primary aim</b>          | To report awareness and use of HnB products in a nationally representative sample                                                                                                                                                                                                                                                                                                                                                                                                                                                                                                                                                                                                                           |
| <b>Products used</b>        | <ul style="list-style-type: none"> <li>IQOS</li> <li>Ploom/Ploom TECH</li> <li>glo</li> </ul>                                                                                                                                                                                                                                                                                                                                                                                                                                                                                                                                                                                                               |
| <b>Methods</b>              | <p><b>Design:</b> Epidemiological study</p> <p><b>Data collection:</b> Internet survey inviting participants from a large survey panel managed by a internet research agency Rakuten Research</p> <p><b>Study time:</b> 31<sup>st</sup> January–17<sup>th</sup> February 2015</p> <p><b>Sampling frame:</b> defined by the Census in Japan</p> <p><b>Measures:</b> awareness and use of e-cigarettes and heat not burn tobacco products, smoking status, other variables (residence area, marital status, education, housing tenure, occupation, self-rated health)</p>                                                                                                                                     |
| <b>Participants</b>         | <p>Participation rate: 8.5% (9055/106202)</p> <p>N=8240 (after excluding participants with discrepancies in reported data)</p>                                                                                                                                                                                                                                                                                                                                                                                                                                                                                                                                                                              |
| <b>Key findings</b>         | <ul style="list-style-type: none"> <li>48.0% (95% CI: 46.9–49.1) were aware of e-cigarettes and HnB tobacco products</li> <li>Current smokers (66–68%) were more aware of e-cigarettes and HnB than never smokers (37–44%)</li> <li>6.6% (95% CI: 6.06–7.13) had ever used e-cigarettes or HnB</li> <li>Among those who had ever used e-cigarettes or HnB, 7.8% (or 0.5148% in total) had ever used Ploom and 8.4% (or 0.5544% in total) had ever used IQOS</li> </ul>                                                                                                                                                                                                                                      |
| <b>Authors’ conclusions</b> | <ul style="list-style-type: none"> <li>Approximately half of Japanese aged 15–69 were aware of e-cigarettes and HnB tobacco products, 6.6% had ever used, 1.3% used in the last 30 days and 1.3% had more than 50 sessions of ever use</li> <li>Among ever users of e-cigarettes and HnB, 7.8% and 8.4% used Ploom and iQOS, respectively</li> </ul>                                                                                                                                                                                                                                                                                                                                                        |
| <b>Authors, study year</b>  | <b>Tabuchi et al., 2017 [32]</b>                                                                                                                                                                                                                                                                                                                                                                                                                                                                                                                                                                                                                                                                            |
| <b>Funder/Affiliations</b>  | <p><b>Affiliations:</b></p> <ul style="list-style-type: none"> <li>Cancer Control Center, Osaka International Cancer Institute, Osaka, Japan</li> <li>Department of Epidemiology, Laboratory of Lifestyle Epidemiology, Istituto di Ricerche Farmacologiche ‘Mario Negri’, Milan, Italy</li> </ul>                                                                                                                                                                                                                                                                                                                                                                                                          |

|                             |                                                                                                                                                                                                                                                                                                                                                                                                                                                                                                                                                                                                                                                                                                                                                                                                                                                                                                                                                                                                                                                                                                                                                                            |
|-----------------------------|----------------------------------------------------------------------------------------------------------------------------------------------------------------------------------------------------------------------------------------------------------------------------------------------------------------------------------------------------------------------------------------------------------------------------------------------------------------------------------------------------------------------------------------------------------------------------------------------------------------------------------------------------------------------------------------------------------------------------------------------------------------------------------------------------------------------------------------------------------------------------------------------------------------------------------------------------------------------------------------------------------------------------------------------------------------------------------------------------------------------------------------------------------------------------|
|                             | <ul style="list-style-type: none"> <li>• Department of Biostatistics, School of Public Health, The University of Tokyo, Bunkyo-ku, Tokyo, Japan</li> <li>• Department of Geography, College of Letters, Ritsumeikan University, Kita-ku, Kyoto, Japan</li> <li>• Department of Environmental Health, National Institute of Public Health, Wako City, Saitama, Japan</li> <li>• School of Public Health, Texas A&amp;M University, College Station, Texas, USA</li> </ul> <p><b>Funding:</b></p> <ul style="list-style-type: none"> <li>• Health Labour Sciences Research Grants (H26-junkankitou-ippan-023, H28-junkankitou-ippan-002, H28-junkankitou- ippan-008 and H29-tokubetsu-shitei-006)</li> <li>• Japan Society for the Promotion of Science (JSPS) KAKENHI Grants (15H02964 and 15K19256).</li> </ul>                                                                                                                                                                                                                                                                                                                                                            |
| <b>Primary aim</b>          | To assess population interest, rate of use, predictors of use, and perceived effects of second-hand HnB aerosol                                                                                                                                                                                                                                                                                                                                                                                                                                                                                                                                                                                                                                                                                                                                                                                                                                                                                                                                                                                                                                                            |
| <b>Products used</b>        | <ul style="list-style-type: none"> <li>• IQOS</li> <li>• Ploom/Ploom TECH</li> <li>• glo</li> </ul>                                                                                                                                                                                                                                                                                                                                                                                                                                                                                                                                                                                                                                                                                                                                                                                                                                                                                                                                                                                                                                                                        |
| <b>Methods</b>              | <p><b>Design:</b> Epidemiological study</p> <p><b>Data collection:</b> Longitudinal internet survey and Google Trends analysis</p> <p><b>Study time:</b> Internet survey baseline 31<sup>st</sup> January–17<sup>th</sup> February 2015, follow-ups: 29<sup>th</sup> January–15<sup>th</sup> February 2016 &amp; 27<sup>th</sup> January–27<sup>th</sup> February 2017</p> <p><b>Sampling frame:</b> defined by the Census in Japan</p> <p><b>Measures:</b></p> <ul style="list-style-type: none"> <li>• Internet survey: awareness and use of e-cigarettes and heat not burn tobacco products, smoking status, exposure to tobacco-related media information (a question whether participants saw TV program which promoted IQOS products), symptoms from exposure to secondhand HnB tobacco aerosol and other variables (residence area, marital status, education, housing tenure, occupation, self-rated health)</li> <li>• Google trends: to evaluate search activity related to HnB tobacco products, weekly aggregated search trends from Japan were analysed using search terms ‘e-cigarettes’, ‘Ploom’, ‘IQOS’ and ‘glo’ both in English and Japanese.</li> </ul> |
| <b>Participants</b>         | <p><b>Response rates of eligible participants:</b> 2015: 8240, 2016: 5366 (65.1%), 2017: 4217 (51.2%)</p> <p>N=8240 (after excluding participants with discrepancies in reported data)</p>                                                                                                                                                                                                                                                                                                                                                                                                                                                                                                                                                                                                                                                                                                                                                                                                                                                                                                                                                                                 |
| <b>Key findings</b>         | <ul style="list-style-type: none"> <li>• The highest relative search volume spike for IQOS in Google was observed in the week of 24–30 April 2016 when IQOS was introduced in the TV show. For Ploom and glo, small spikes were notices corresponding to release times of these products</li> <li>• In 2017, the e-cigarette current user rate had increased to 1.9% (from 1.3% in 2015), while the IQOS current user rate had increased to 3.6% (from 0.3% in 2015). The Ploom Tech current user rate increased to 1.2% (from 0.3% in 2015), and the glo current user rate was 0.8% in 2017.</li> <li>• Respondents who had seen the IQOS promotion on the TV program in April 2016 were significantly more likely to use it than those who had not (10.3% vs 2.7%)</li> </ul>                                                                                                                                                                                                                                                                                                                                                                                            |
| <b>Authors’ conclusions</b> | <ul style="list-style-type: none"> <li>• The entertainment TV programme triggered IQOS diffusion in Japan</li> <li>• 3.6% of people currently used IQOS, while 4.7% currently used any HnB or e-cigarette product and 3.4% were dual users</li> </ul>                                                                                                                                                                                                                                                                                                                                                                                                                                                                                                                                                                                                                                                                                                                                                                                                                                                                                                                      |
|                             |                                                                                                                                                                                                                                                                                                                                                                                                                                                                                                                                                                                                                                                                                                                                                                                                                                                                                                                                                                                                                                                                                                                                                                            |

|                             |                                                                                                                                                                                                                                                                                                                                                                                                                                                                       |
|-----------------------------|-----------------------------------------------------------------------------------------------------------------------------------------------------------------------------------------------------------------------------------------------------------------------------------------------------------------------------------------------------------------------------------------------------------------------------------------------------------------------|
| <b>Authors, study year</b>  | <b>Brose et al., 2018 [33]</b>                                                                                                                                                                                                                                                                                                                                                                                                                                        |
| <b>Funder/Affiliations</b>  | <p><b>Affiliations:</b></p> <ul style="list-style-type: none"> <li>National Addiction Centre, Institute of Psychiatry, Psychology &amp; Neuroscience (IoPPN), London, UK</li> <li>Action on Smoking and Health, London, UK</li> </ul> <p><b>Funding:</b></p> <ul style="list-style-type: none"> <li>Cancer Research UK (CRUK)/BUPA Foundation Cancer Prevention Fellowship (grant number C52999/A19748)</li> </ul>                                                    |
| <b>Primary aim</b>          | To assess awareness and use of HnB products in a nationally representative sample                                                                                                                                                                                                                                                                                                                                                                                     |
| <b>Products used</b>        | <ul style="list-style-type: none"> <li>IQOS</li> <li>Ploom/Ploom TECH</li> </ul>                                                                                                                                                                                                                                                                                                                                                                                      |
| <b>Methods</b>              | <p><b>Design:</b> Epidemiological study</p> <p><b>Data collection:</b> National internet survey</p> <p><b>Study time:</b> February–March 2017</p> <p><b>Sampling frame:</b> defined by 2011 UK Census; large scale probability surveys; results of the 2015 general election; and population estimates from the Office for National Statistics</p> <p><b>Measures:</b> socio-demographics, smoking status, e-cigarette and HnB tobacco products awareness and use</p> |
| <b>Participants</b>         | N=12696                                                                                                                                                                                                                                                                                                                                                                                                                                                               |
| <b>Key findings</b>         | <ul style="list-style-type: none"> <li>9.3% of respondents were aware of HnB tobacco products, 1.7% had or were using them</li> <li>Never e-cigarette users were more likely to be unaware of HnB products, current e-cigarette triers/ users were more likely to be experimenting with HnB</li> </ul>                                                                                                                                                                |
| <b>Authors' conclusions</b> | <ul style="list-style-type: none"> <li>In 2017 in GB, awareness and use of HnB tobacco products was very low: about 9% were aware and less than 2% had tried or used these products</li> </ul>                                                                                                                                                                                                                                                                        |



## References

- [1] US Food and Drug Administration. Reporting Harmful and Potentially Harmful Constituents in Tobacco Products and Tobacco Smoke Under Section 904(a)(3) of the Federal Food, Drug, and Cosmetic Act. 2012.
- [2] Picavet P, Haziza C, Lama N, *et al.* Comparison of the Pharmacokinetics of Nicotine Following Single and Ad Libitum Use of a Tobacco Heating System or Combustible Cigarettes. *Nicotine Tob Res* 2016;**18**(5):557-563.
- [3] Brossard P, Weitkunat R, Poux V, *et al.* Nicotine pharmacokinetic profiles of the Tobacco Heating System 2.2, cigarettes and nicotine gum in Japanese smokers. *Regul Toxicol Pharmacol* 2017;**89**(November 2013):193-199.
- [4] Yuki D, Sakaguchi C, Kikuchi A, *et al.* Pharmacokinetics of nicotine following the controlled use of a prototype novel tobacco vapor product. *Regul Toxicol Pharmacol* 2017;**87**:30-35.
- [5] Ludicke F, Baker G, Magnette J, *et al.* Reduced Exposure to Harmful and Potentially Harmful Smoke Constituents With the Tobacco Heating System 2.1. *Nicotine Tob Res* 2017;**19**(2):168-175.
- [6] Ludicke F, Haziza C, Weitkunat R, *et al.* Evaluation of Biomarkers of Exposure in Smokers Switching to a Carbon-Heated Tobacco Product: A Controlled, Randomized, Open-Label 5-Day Exposure Study. *Nicotine Tob Res* 2016;**18**(7):1606-1613.
- [7] Lopez AA, Hiler M, Maloney S, *et al.* Expanding clinical laboratory tobacco product evaluation methods to loose-leaf tobacco vaporizers. *Drug Alcohol Depend* 2016;**169**:33-40.
- [8] Haziza C, de La Bourdonnaye G, Merlet S, *et al.* Assessment of the reduction in levels of exposure to harmful and potentially harmful constituents in Japanese subjects using a novel tobacco heating system compared with conventional cigarettes and smoking abstinence: A randomized controlled study in confinement. *Regul Toxicol Pharmacol* 2016;**81**:489-499.
- [9] Haziza C, de La Bourdonnaye G, Skiada D, *et al.* Evaluation of the Tobacco Heating System 2.2. Part 8: 5-Day randomized reduced exposure clinical study in Poland. *Regul Toxicol Pharmacol* 2016;**81 Suppl 2**:S139-S150.
- [10] Ludicke F, Picavet P, Baker G, *et al.* Effects of Switching to the Tobacco Heating System 2.2 Menthol, Smoking Abstinence, or Continued Cigarette Smoking on Biomarkers of Exposure: A Randomized, Controlled, Open-Label, Multicenter Study in Sequential Confinement and Ambulatory Settings (Part 1). *Nicotine Tob Res* 2017(February):1-10.
- [11] Ludicke F, Picavet P, Baker G, *et al.* Effects of Switching to the Menthol Tobacco Heating System 2.2, Smoking Abstinence, or Continued Cigarette Smoking on Clinically Relevant Risk Markers: A Randomized, Controlled, Open-Label, Multicenter Study in Sequential Confinement and Ambulatory Settings (Part 2). *Nicotine Tob Res* 2017(February):1-10.
- [12] Gee J, Prasad K, Slayford S, *et al.* Assessment of tobacco heating product THP1.0. Part 8: Study to determine puffing topography, mouth level exposure and consumption among Japanese users. *Regul Toxicol Pharmacol* 2017.
- [13] Auer R, Concha-Lozano N, Jacot-Sadowski I, *et al.* Heat-Not-Burn Tobacco Cigarettes: Smoke by Any Other Name. *JAMA Intern Med* 2017;**177**(7):1050-1052.
- [14] Vu AT, Taylor KM, Holman MR, *et al.* Polycyclic Aromatic Hydrocarbons in the Mainstream Smoke of Popular U.S. Cigarettes. *Chem Res Toxicol* 2015;**28**(8):1616-1626.

- [15] Farsalinos KE, Yannovits N, Sarri T, *et al.* Nicotine delivery to the aerosol of a heat-not-burn tobacco product: comparison with a tobacco cigarette and e-cigarettes. *Nicotine Tob Res* 2017.
- [16] Bekki K, Inaba Y, Uchiyama S, *et al.* Comparison of Chemicals in Mainstream Smoke in Heat-not-burn Tobacco and Combustion Cigarettes. *J UOEH* 2017;**39**(3):201-207.
- [17] Schaller JP, Keller D, Poget L, *et al.* Evaluation of the Tobacco Heating System 2.2. Part 2: Chemical composition, genotoxicity, cytotoxicity, and physical properties of the aerosol. *Regul Toxicol Pharmacol* 2016;**81 Suppl 2**:S27-S47.
- [18] Schaller JP, Pijnenburg JP, Ajithkumar A, *et al.* Evaluation of the Tobacco Heating System 2.2. Part 3: Influence of the tobacco blend on the formation of harmful and potentially harmful constituents of the Tobacco Heating System 2.2 aerosol. *Regul Toxicol Pharmacol* 2016;**81 Suppl 2**:S48-S58.
- [19] Protano C, Manigrasso M, Avino P, *et al.* Second-hand smoke exposure generated by new electronic devices (IQOS(R) and e-cigs) and traditional cigarettes: submicron particle behaviour in human respiratory system. *Ann Ig* 2016;**28**(2):109-112.
- [20] Ruprecht AA, De Marco C, Saffari A, *et al.* Environmental pollution and emission factors of electronic cigarettes, heat-not-burn tobacco products, and conventional cigarettes. *Aerosol Science and Technology* 2017;**51**(6):674-684.
- [21] Mitova MI, Campelos PB, Goujon-Ginglinger CG, *et al.* Comparison of the impact of the Tobacco Heating System 2.2 and a cigarette on indoor air quality. *Regul Toxicol Pharmacol* 2016;**80**:91-101.
- [22] O'Connell G, Wilkinson P, Burseg KMM, *et al.* Heated Tobacco Products Create Side-Stream Emissions: Implications for Regulation. *Journal of Environmental Analytical Chemistry* 2015;**02**(05):2-4.
- [23] Eaton D, Jakaj B, Forster M, *et al.* Assessment of tobacco heating product THP1.0. Part 2: Product design, operation and thermophysical characterisation. *Regul Toxicol Pharmacol* 2017.
- [24] Forster M, Fiebelkorn S, Yurteri C, *et al.* Assessment of novel tobacco heating product THP1.0. Part 3: Comprehensive chemical characterisation of harmful and potentially harmful aerosol emissions. *Regul Toxicol Pharmacol* 2017.
- [25] Forster M, McAughey J, Prasad K, *et al.* Assessment of tobacco heating product THP1.0. Part 4: Characterisation of indoor air quality and odour. *Regul Toxicol Pharmacol* 2017.
- [26] Protano C, Manigrasso M, Avino P, *et al.* Second-hand smoke generated by combustion and electronic smoking devices used in real scenarios: Ultrafine particle pollution and age-related dose assessment. *Environ Int* 2017;**107**:190-195.
- [27] Jaccard G, Tafin Djoko D, Moennikes O, *et al.* Comparative assessment of HPHC yields in the Tobacco Heating System THS2.2 and commercial cigarettes. *Regul Toxicol Pharmacol* 2017;**90**:1-8.
- [28] Poynton S, Sutton J, Goodall S, *et al.* A novel hybrid tobacco product that delivers a tobacco flavour note with vapour aerosol (Part 1): Product operation and preliminary aerosol chemistry assessment. *Food Chem Toxicol* 2017;**106**(Pt A):522-532.
- [29] Pratte P, Cosandey S, Goujon Ginglinger C. Investigation of solid particles in the mainstream aerosol of the Tobacco Heating System THS2.2 and mainstream smoke of a 3R4F reference cigarette. *Hum Exp Toxicol* 2017;**36**(11):1115-1120.

- [30] Haziza C, de La Bourdonnaye G, Skiada D, *et al.* Biomarker of exposure level data set in smokers switching from conventional cigarettes to Tobacco Heating System 2.2, continuing smoking or abstaining from smoking for 5 days. *Data Brief* 2017;**10**:283-293.
- [31] Tabuchi T, Kiyohara K, Hoshino T, *et al.* Awareness and use of electronic cigarettes and heat-not-burn tobacco products in Japan. *Addiction* 2016;**111**(4):706-713.
- [32] Tabuchi T, Gallus S, Shinozaki T, *et al.* Heat-not-burn tobacco product use in Japan: its prevalence, predictors, and perceived symptoms from exposure to secondhand heat-not-burn-tobacco aerosol. *Tobacco Control* 2017:1-9.
- [33] Brose L, Simonavicius E, Cheeseman H. Awareness and Use of 'Heat-not-burn' Tobacco Products in Great Britain. *Tobacco Regulatory Science* 2018;**4**(2):44-50.
